# Supplementary material for: Evaluation of extracellular polymeric substances extracted from waste activated sludge as a renewable corrosion inhibitor
Source: PeerJ. 2019 Jun 26;7:e7193. doi: 10.7717/peerj.7193 (PMC6599447; doi:10.7717/peerj.7193)
Supplement: Supplemental Information 1 [file peerj-07-7193-s001.xlsx]

## Sheet: WAS
blank	-0.956	-3.18006	batch 1	-0.956	-3.18006	batch 2	-0.956	-3.18006	batch 3	-0.956	-3.18006	avg		200 ppm	-0.9425	-3.23928	batch 1	-0.9389	-3.26616	batch 2	-0.939	-3.28811	batch 3	-0.9401	-3.26452	avg		400 ppm	-0.9416	-3.18052	batch 1	-0.9387	-3.28241	batch 2	-0.9387	-3.28777	batch 3	-0.9397	-3.25024	avg		600 ppm	-0.9421	-3.18105	batch 1	-0.9389	-3.19593	batch 2	-0.9371
	-0.955	-3.23882		-0.955	-3.23882		-0.955	-3.23882		-0.955	-3.23882				-0.9414	-3.29048		-0.9378	-3.32185		-0.9379	-3.34046		-0.939	-3.3176				-0.9405	-3.23121		-0.9377	-3.33876		-0.9377	-3.33942		-0.9386	-3.30313				-0.9411	-3.23388		-0.9378	-3.24826		-0.9361
	-0.9542	-3.27934		-0.9542	-3.27934		-0.9542	-3.27934		-0.9542	-3.27934				-0.9406	-3.32303		-0.937	-3.3535		-0.9371	-3.37192		-0.9382	-3.34948				-0.9397	-3.26289		-0.9369	-3.37438		-0.9369	-3.37243		-0.9378	-3.33657				-0.9403	-3.2672		-0.937	-3.28325		-0.9352
	-0.9534	-3.3106		-0.9534	-3.3106		-0.9534	-3.3106		-0.9534	-3.3106				-0.9398	-3.34679		-0.9361	-3.37893		-0.9362	-3.39534		-0.9374	-3.37369				-0.9389	-3.28601		-0.936	-3.4011		-0.936	-3.39383		-0.937	-3.36031				-0.9395	-3.29115		-0.9362	-3.30901		-0.9344
	-0.9525	-3.33592		-0.9525	-3.33592		-0.9525	-3.33592		-0.9525	-3.33592				-0.939	-3.36512		-0.9353	-3.40187		-0.9354	-3.4115		-0.9366	-3.39283				-0.9381	-3.30391		-0.9352	-3.42159		-0.9352	-3.41162		-0.9362	-3.37904				-0.9386	-3.30963		-0.9353	-3.32985		-0.9336
	-0.9517	-3.35724		-0.9517	-3.35724		-0.9517	-3.35724		-0.9517	-3.35724				-0.9381	-3.38038		-0.9345	-3.42216		-0.9346	-3.42435		-0.9357	-3.40897				-0.9372	-3.31894		-0.9344	-3.44057		-0.9344	-3.42724		-0.9353	-3.39559				-0.9378	-3.32486		-0.9345	-3.34824		-0.9327
	-0.9509	-3.37613		-0.9509	-3.37613		-0.9509	-3.37613		-0.9509	-3.37613				-0.9373	-3.39254		-0.9336	-3.43545		-0.9337	-3.43962		-0.9349	-3.42254				-0.9364	-3.33161		-0.9335	-3.45358		-0.9335	-3.43962		-0.9345	-3.40827				-0.937	-3.33847		-0.9337	-3.36522		-0.9319
	-0.9501	-3.39319		-0.9501	-3.39319		-0.9501	-3.39319		-0.9501	-3.39319				-0.9365	-3.40274		-0.9328	-3.44855		-0.9329	-3.45247		-0.9341	-3.43459				-0.9356	-3.34228		-0.9327	-3.46712		-0.9327	-3.45149		-0.9337	-3.42029				-0.9361	-3.35018		-0.9328	-3.38206		-0.9311
	-0.9492	-3.40838		-0.9492	-3.40838		-0.9492	-3.40838		-0.9492	-3.40838				-0.9356	-3.41274		-0.932	-3.4598		-0.9321	-3.46067		-0.9332	-3.4444				-0.9347	-3.35223		-0.9319	-3.4786		-0.9319	-3.46218		-0.9328	-3.431				-0.9353	-3.35952		-0.932	-3.39816		-0.9302
	-0.9484	-3.42251		-0.9484	-3.42251		-0.9484	-3.42251		-0.9484	-3.42251				-0.9348	-3.42182		-0.9312	-3.46839		-0.9312	-3.47108		-0.9324	-3.45377				-0.9339	-3.36171		-0.931	-3.48945		-0.931	-3.47289		-0.932	-3.44135				-0.9345	-3.36795		-0.9312	-3.41319		-0.9294
	-0.9475	-3.43427		-0.9475	-3.43427		-0.9475	-3.43427		-0.9475	-3.43427				-0.934	-3.43063		-0.9303	-3.47638		-0.9304	-3.48413		-0.9316	-3.46371				-0.9331	-3.3713		-0.9302	-3.49908		-0.9302	-3.48135		-0.9312	-3.45058				-0.9336	-3.37541		-0.9303	-3.42713		-0.9286
	-0.9467	-3.44394		-0.9467	-3.44394		-0.9467	-3.44394		-0.9467	-3.44394				-0.9331	-3.43938		-0.9295	-3.48625		-0.9296	-3.49093		-0.9307	-3.47219				-0.9322	-3.38038		-0.9294	-3.50962		-0.9294	-3.49107		-0.9303	-3.46036				-0.9328	-3.38216		-0.9295	-3.43962		-0.9278
	-0.9459	-3.45198		-0.9459	-3.45198		-0.9459	-3.45198		-0.9459	-3.45198				-0.9323	-3.44721		-0.9287	-3.4973		-0.9288	-3.49499		-0.9299	-3.47983				-0.9314	-3.38902		-0.9286	-3.51827		-0.9286	-3.49963		-0.9295	-3.46897				-0.932	-3.38966		-0.9287	-3.45075		-0.9269
	-0.9451	-3.4608		-0.9451	-3.4608		-0.9451	-3.4608		-0.9451	-3.4608				-0.9315	-3.45321		-0.9278	-3.51173		-0.9279	-3.50197		-0.9291	-3.48897				-0.9306	-3.39696		-0.9277	-3.52535		-0.9277	-3.5092		-0.9287	-3.47717				-0.9312	-3.3974		-0.9279	-3.46118		-0.9261
	-0.9442	-3.47134		-0.9442	-3.47134		-0.9442	-3.47134		-0.9442	-3.47134				-0.9307	-3.4603		-0.927	-3.52317		-0.9271	-3.51201		-0.9283	-3.49849				-0.9298	-3.40472		-0.9269	-3.53077		-0.9269	-3.51813		-0.9279	-3.48454				-0.9303	-3.40483		-0.927	-3.47095		-0.9253
	-0.9434	-3.48294		-0.9434	-3.48294		-0.9434	-3.48294		-0.9434	-3.48294				-0.9298	-3.4675		-0.9262	-3.5321		-0.9263	-3.52418		-0.9274	-3.50793				-0.9289	-3.41341		-0.9261	-3.54106		-0.9261	-3.52578		-0.927	-3.49342				-0.9295	-3.4133		-0.9262	-3.47912		-0.9244
	-0.9426	-3.49499		-0.9426	-3.49499		-0.9426	-3.49499		-0.9426	-3.49499				-0.929	-3.47483		-0.9254	-3.53925		-0.9255	-3.53077		-0.9266	-3.51495				-0.9281	-3.42205		-0.9252	-3.54867		-0.9253	-3.53003		-0.9262	-3.50025				-0.9287	-3.42182		-0.9254	-3.48532		-0.9236
	-0.9418	-3.50696		-0.9418	-3.50696		-0.9418	-3.50696		-0.9418	-3.50696				-0.9282	-3.48162		-0.9245	-3.54914		-0.9246	-3.5367		-0.9258	-3.52249				-0.9273	-3.43039		-0.9244	-3.55846		-0.9244	-3.53343		-0.9254	-3.50743				-0.9278	-3.43004		-0.9245	-3.48919		-0.9228
	-0.9409	-3.51827		-0.9409	-3.51827		-0.9409	-3.51827		-0.9409	-3.51827				-0.9273	-3.48758		-0.9237	-3.55972		-0.9238	-3.53955		-0.9249	-3.52895				-0.9264	-3.43806		-0.9236	-3.56543		-0.9236	-3.5385		-0.9245	-3.514				-0.927	-3.43795		-0.9237	-3.49553		-0.9219
	-0.9401	-3.52915		-0.9401	-3.52915		-0.9401	-3.52915		-0.9401	-3.52915				-0.9265	-3.49485		-0.9229	-3.56928		-0.923	-3.54409		-0.9241	-3.53607				-0.9256	-3.44515		-0.9227	-3.57025		-0.9228	-3.54714		-0.9237	-3.52085				-0.9262	-3.44539		-0.9229	-3.50404		-0.9211
	-0.9393	-3.5394		-0.9393	-3.5394		-0.9393	-3.5394		-0.9393	-3.5394				-0.9257	-3.50169		-0.922	-3.57594		-0.9221	-3.54944		-0.9233	-3.54236				-0.9248	-3.45124		-0.9219	-3.58054		-0.9219	-3.55284		-0.9229	-3.52821				-0.9254	-3.45235		-0.922	-3.51286		-0.9203
	-0.9384	-3.5496		-0.9384	-3.5496		-0.9384	-3.5496		-0.9384	-3.5496				-0.9248	-3.50878		-0.9212	-3.58419		-0.9213	-3.55956		-0.9224	-3.55084				-0.924	-3.4568		-0.9211	-3.59074		-0.9211	-3.55925		-0.9221	-3.5356				-0.9245	-3.45905		-0.9212	-3.52042		-0.9194
	-0.9376	-3.55941		-0.9376	-3.55941		-0.9376	-3.55941		-0.9376	-3.55941				-0.924	-3.51485		-0.9204	-3.5872		-0.9204	-3.57073		-0.9216	-3.55759				-0.9231	-3.46281		-0.9202	-3.59636		-0.9202	-3.56225		-0.9212	-3.54048				-0.9237	-3.46395		-0.9204	-3.52827		-0.9186
	-0.9368	-3.56848		-0.9368	-3.56848		-0.9368	-3.56848		-0.9368	-3.56848				-0.9232	-3.52014		-0.9195	-3.5899		-0.9196	-3.5822		-0.9208	-3.56408				-0.9223	-3.46801		-0.9194	-3.6031		-0.9194	-3.56976		-0.9204	-3.54696				-0.9229	-3.46954		-0.9195	-3.53745		-0.9178
	-0.9359	-3.57774		-0.9359	-3.57774		-0.9359	-3.57774		-0.9359	-3.57774				-0.9223	-3.52608		-0.9187	-3.59912		-0.9188	-3.58771		-0.9199	-3.57097				-0.9214	-3.47457		-0.9186	-3.61119		-0.9186	-3.58021		-0.9195	-3.55532				-0.922	-3.47664		-0.9187	-3.54683		-0.917
	-0.9351	-3.5867		-0.9351	-3.5867		-0.9351	-3.5867		-0.9351	-3.5867				-0.9215	-3.53343		-0.9179	-3.60871		-0.918	-3.59363		-0.9191	-3.57859				-0.9206	-3.48162		-0.9178	-3.61279		-0.9178	-3.5867		-0.9187	-3.56037				-0.9212	-3.48399		-0.9179	-3.55517		-0.9162
	-0.9343	-3.59551		-0.9343	-3.59551		-0.9343	-3.59551		-0.9343	-3.59551				-0.9207	-3.54166		-0.917	-3.61368		-0.9171	-3.59825		-0.9183	-3.58453				-0.9198	-3.48785		-0.9169	-3.61979		-0.9169	-3.59397		-0.9179	-3.5672				-0.9204	-3.49107		-0.9171	-3.56209		-0.9153
	-0.9334	-3.60398		-0.9334	-3.60398		-0.9334	-3.60398		-0.9334	-3.60398				-0.9198	-3.54975		-0.9162	-3.61997		-0.9163	-3.6045		-0.9174	-3.59141				-0.919	-3.49431		-0.9161	-3.62379		-0.9161	-3.59912		-0.9171	-3.5724				-0.9195	-3.49757		-0.9162	-3.56912		-0.9145
	-0.9326	-3.6119		-0.9326	-3.6119		-0.9326	-3.6119		-0.9326	-3.6119				-0.919	-3.55752		-0.9154	-3.62142		-0.9155	-3.61083		-0.9166	-3.59659				-0.9181	-3.5021		-0.9153	-3.63209		-0.9153	-3.60678		-0.9162	-3.58032				-0.9187	-3.50376		-0.9154	-3.57692		-0.9136
	-0.9318	-3.61997		-0.9318	-3.61997		-0.9318	-3.61997		-0.9318	-3.61997				-0.9182	-3.56479		-0.9145	-3.62415		-0.9147	-3.61154		-0.9158	-3.60016				-0.9173	-3.50934		-0.9144	-3.63695		-0.9144	-3.60801		-0.9154	-3.58477				-0.9179	-3.51018		-0.9146	-3.58286		-0.9128
	-0.9309	-3.62819		-0.9309	-3.62819		-0.9309	-3.62819		-0.9309	-3.62819				-0.9174	-3.57187		-0.9137	-3.62875		-0.9138	-3.61457		-0.915	-3.60506				-0.9165	-3.51713		-0.9136	-3.64628		-0.9136	-3.61013		-0.9146	-3.59118				-0.917	-3.51556		-0.9137	-3.58653		-0.912
	-0.9301	-3.63658		-0.9301	-3.63658		-0.9301	-3.63658		-0.9301	-3.63658				-0.9165	-3.57905		-0.9129	-3.63526		-0.913	-3.61834		-0.9141	-3.61089				-0.9157	-3.52491		-0.9128	-3.65659		-0.9128	-3.61744		-0.9138	-3.59965				-0.9162	-3.52158		-0.9129	-3.59024		-0.9112
	-0.9293	-3.64474		-0.9293	-3.64474		-0.9293	-3.64474		-0.9293	-3.64474				-0.9157	-3.58653		-0.9121	-3.6457		-0.9122	-3.62361		-0.9133	-3.61861				-0.9148	-3.5318		-0.912	-3.66474		-0.912	-3.62617		-0.9129	-3.60757				-0.9154	-3.52812		-0.9121	-3.59465		-0.9103
	-0.9285	-3.65189		-0.9285	-3.65189		-0.9285	-3.65189		-0.9285	-3.65189				-0.9149	-3.59193		-0.9113	-3.65758		-0.9113	-3.63227		-0.9125	-3.62726				-0.914	-3.53835		-0.9111	-3.66797		-0.9111	-3.63489		-0.9121	-3.61373				-0.9146	-3.53521		-0.9113	-3.60137		-0.9095
	-0.9277	-3.65936		-0.9277	-3.65936		-0.9277	-3.65936		-0.9277	-3.65936				-0.914	-3.59688		-0.9104	-3.65936		-0.9105	-3.63545		-0.9116	-3.63056				-0.9132	-3.54516		-0.9103	-3.67203		-0.9103	-3.63884		-0.9113	-3.61867				-0.9137	-3.54227		-0.9104	-3.60871		-0.9087
	-0.9268	-3.66675		-0.9268	-3.66675		-0.9268	-3.66675		-0.9268	-3.66675				-0.9132	-3.59946		-0.9096	-3.66314		-0.9097	-3.63695		-0.9108	-3.63318				-0.9123	-3.5516		-0.9094	-3.67861		-0.9095	-3.64245		-0.9104	-3.62422				-0.9129	-3.54867		-0.9096	-3.61654		-0.9078
	-0.926	-3.67325		-0.926	-3.67325		-0.926	-3.67325		-0.926	-3.67325				-0.9124	-3.60258		-0.9087	-3.67162		-0.9088	-3.64647		-0.91	-3.64022				-0.9115	-3.55815		-0.9086	-3.68529		-0.9086	-3.6484		-0.9096	-3.63061				-0.9121	-3.55549		-0.9087	-3.62489		-0.907
	-0.9252	-3.67985		-0.9252	-3.67985		-0.9252	-3.67985		-0.9252	-3.67985				-0.9116	-3.60765		-0.9079	-3.67778		-0.908	-3.65718		-0.9092	-3.64754				-0.9107	-3.56241		-0.9078	-3.68761		-0.9078	-3.6562		-0.9088	-3.63541				-0.9112	-3.56257		-0.9079	-3.63264		-0.9062
	-0.9243	-3.68655		-0.9243	-3.68655		-0.9243	-3.68655		-0.9243	-3.68655				-0.9107	-3.61457		-0.9071	-3.68319		-0.9072	-3.66334		-0.9083	-3.6537				-0.9098	-3.56799		-0.907	-3.68931		-0.907	-3.66454		-0.9079	-3.64061				-0.9104	-3.56976		-0.9071	-3.64073		-0.9053
	-0.9235	-3.69357		-0.9235	-3.69357		-0.9235	-3.69357		-0.9235	-3.69357				-0.9099	-3.62197		-0.9062	-3.68782		-0.9063	-3.66535		-0.9075	-3.65838				-0.909	-3.57479		-0.9061	-3.69724		-0.9061	-3.66878		-0.9071	-3.64693				-0.9096	-3.57692		-0.9063	-3.64628		-0.9045
	-0.9227	-3.70071		-0.9227	-3.70071		-0.9227	-3.70071		-0.9227	-3.70071				-0.9091	-3.62856		-0.9054	-3.68931		-0.9055	-3.66655		-0.9067	-3.66147				-0.9082	-3.5812		-0.9053	-3.70224		-0.9053	-3.67469		-0.9063	-3.65271				-0.9087	-3.58336		-0.9054	-3.6484		-0.9037
	-0.9218	-3.70774		-0.9218	-3.70774		-0.9218	-3.70774		-0.9218	-3.70774				-0.9082	-3.63432		-0.9046	-3.69443		-0.9047	-3.67285		-0.9058	-3.6672				-0.9073	-3.5872		-0.9045	-3.70686		-0.9045	-3.68152		-0.9054	-3.65853				-0.9079	-3.58872		-0.9046	-3.65247		-0.9028
	-0.921	-3.71489		-0.921	-3.71489		-0.921	-3.71489		-0.921	-3.71489				-0.9074	-3.64092		-0.9038	-3.69767		-0.9039	-3.67613		-0.905	-3.67157				-0.9065	-3.59431		-0.9037	-3.70908		-0.9037	-3.68613		-0.9046	-3.66317				-0.9071	-3.59346		-0.9038	-3.66035		-0.902
	-0.9201	-3.72193		-0.9201	-3.72193		-0.9201	-3.72193		-0.9201	-3.72193				-0.9066	-3.64724		-0.9029	-3.70202		-0.903	-3.68508		-0.9042	-3.67811				-0.9057	-3.60223		-0.9028	-3.71579		-0.9028	-3.68529		-0.9038	-3.66777				-0.9062	-3.59998		-0.9029	-3.66776		-0.9012
	-0.9193	-3.72862		-0.9193	-3.72862		-0.9193	-3.72862		-0.9193	-3.72862				-0.9058	-3.65208		-0.9021	-3.70642		-0.9022	-3.69486		-0.9034	-3.68445				-0.9049	-3.61066		-0.902	-3.71783		-0.902	-3.68888		-0.903	-3.67246				-0.9054	-3.60607		-0.9021	-3.67469		-0.9004
	-0.9185	-3.73495		-0.9185	-3.73495		-0.9185	-3.73495		-0.9185	-3.73495				-0.9049	-3.65758		-0.9013	-3.71467		-0.9014	-3.6981		-0.9025	-3.69012				-0.904	-3.61726		-0.9012	-3.72285		-0.9012	-3.69357		-0.9021	-3.6779				-0.9046	-3.61261		-0.9013	-3.68256		-0.8995
	-0.9177	-3.74065		-0.9177	-3.74065		-0.9177	-3.74065		-0.9177	-3.74065				-0.9041	-3.66214		-0.9005	-3.7167		-0.9006	-3.69984		-0.9017	-3.69289				-0.9032	-3.62342		-0.9003	-3.72239		-0.9004	-3.69832		-0.9013	-3.68138				-0.9038	-3.61979		-0.9005	-3.69144		-0.8987
	-0.9168	-3.74642		-0.9168	-3.74642		-0.9168	-3.74642		-0.9168	-3.74642				-0.9033	-3.66716		-0.8996	-3.72469		-0.8997	-3.70752		-0.9009	-3.69979				-0.9024	-3.62875		-0.8995	-3.72932		-0.8995	-3.70686		-0.9005	-3.68831				-0.9029	-3.62635		-0.8996	-3.69962		-0.8979
	-0.916	-3.75252		-0.916	-3.75252		-0.916	-3.75252		-0.916	-3.75252				-0.9024	-3.67305		-0.8988	-3.73424		-0.8989	-3.71489		-0.9	-3.70739				-0.9015	-3.63564		-0.8987	-3.73471		-0.8987	-3.71512		-0.8996	-3.69516				-0.9021	-3.63302		-0.8988	-3.70686		-0.8971
	-0.9152	-3.75845		-0.9152	-3.75845		-0.9152	-3.75845		-0.9152	-3.75845				-0.9016	-3.67944		-0.8979	-3.74208		-0.8981	-3.71783		-0.8992	-3.71312				-0.9007	-3.64264		-0.8978	-3.73802		-0.8978	-3.71897		-0.8988	-3.69988				-0.9013	-3.63865		-0.898	-3.71287		-0.8962
	-0.9144	-3.76422		-0.9144	-3.76422		-0.9144	-3.76422		-0.9144	-3.76422				-0.9008	-3.6855		-0.8971	-3.74328		-0.8972	-3.71829		-0.8984	-3.71569				-0.8999	-3.64898		-0.897	-3.74328		-0.897	-3.724		-0.898	-3.70542				-0.9004	-3.64436		-0.8971	-3.71897		-0.8954
	-0.9135	-3.76981		-0.9135	-3.76981		-0.9135	-3.76981		-0.9135	-3.76981				-0.8999	-3.69122		-0.8963	-3.74739		-0.8964	-3.72102		-0.8975	-3.71988				-0.899	-3.65561		-0.8962	-3.74982		-0.8962	-3.72932		-0.8971	-3.71158				-0.8996	-3.64917		-0.8963	-3.72515		-0.8946
	-0.9127	-3.77521		-0.9127	-3.77521		-0.9127	-3.77521		-0.9127	-3.77521				-0.8991	-3.69724		-0.8955	-3.74763		-0.8956	-3.72584		-0.8967	-3.72357				-0.8982	-3.66115		-0.8953	-3.75796		-0.8953	-3.734		-0.8963	-3.7177				-0.8988	-3.65561		-0.8955	-3.73189		-0.8937
	-0.9119	-3.78094		-0.9119	-3.78094		-0.9119	-3.78094		-0.9119	-3.78094				-0.8983	-3.70268		-0.8946	-3.75007		-0.8947	-3.73283		-0.8959	-3.72852				-0.8974	-3.66675		-0.8945	-3.76447		-0.8945	-3.73802		-0.8955	-3.72308				-0.8979	-3.66314		-0.8947	-3.73826		-0.8929
	-0.911	-3.78675		-0.911	-3.78675		-0.911	-3.78675		-0.911	-3.78675				-0.8975	-3.70708		-0.8938	-3.75252		-0.8939	-3.73755		-0.8951	-3.73238				-0.8965	-3.67142		-0.8937	-3.77314		-0.8937	-3.74497		-0.8946	-3.72984				-0.8971	-3.6704		-0.8938	-3.74112		-0.8921
	-0.9102	-3.79237		-0.9102	-3.79237		-0.9102	-3.79237		-0.9102	-3.79237				-0.8966	-3.70885		-0.893	-3.7587		-0.8931	-3.74065		-0.8942	-3.73607				-0.8957	-3.67654		-0.8929	-3.78278		-0.8929	-3.75399		-0.8938	-3.73777				-0.8963	-3.67716		-0.893	-3.74473		-0.8912
	-0.9094	-3.79806		-0.9094	-3.79806		-0.9094	-3.79806		-0.9094	-3.79806				-0.8958	-3.71489		-0.8922	-3.76447		-0.8922	-3.74136		-0.8934	-3.74024				-0.8949	-3.68277		-0.892	-3.78808		-0.892	-3.76045		-0.893	-3.74377				-0.8955	-3.68298		-0.8922	-3.75129		-0.8904
	-0.9085	-3.80272		-0.9085	-3.80272		-0.9085	-3.80272		-0.9085	-3.80272				-0.895	-3.72308		-0.8913	-3.77083		-0.8914	-3.74861		-0.8926	-3.7475				-0.8941	-3.68973		-0.8912	-3.78304		-0.8912	-3.76221		-0.8922	-3.74499				-0.8946	-3.68909		-0.8913	-3.75895		-0.8896
	-0.9077	-3.80771		-0.9077	-3.80771		-0.9077	-3.80771		-0.9077	-3.80771				-0.8941	-3.72955		-0.8905	-3.77833		-0.8906	-3.75548		-0.8917	-3.75445				-0.8932	-3.69745		-0.8904	-3.78357		-0.8904	-3.74934		-0.8913	-3.74345				-0.8938	-3.69508		-0.8905	-3.76574		-0.8888
	-0.9069	-3.81276		-0.9069	-3.81276		-0.9069	-3.81276		-0.9069	-3.81276				-0.8933	-3.73542		-0.8897	-3.78225		-0.8898	-3.75597		-0.8909	-3.75788				-0.8924	-3.70487		-0.8895	-3.79022		-0.8896	-3.74934		-0.8905	-3.74814				-0.893	-3.70071		-0.8897	-3.77186		-0.8879
	-0.906	-3.81759		-0.906	-3.81759		-0.906	-3.81759		-0.906	-3.81759				-0.8925	-3.74112		-0.8888	-3.78941		-0.8889	-3.7592		-0.8901	-3.76325				-0.8916	-3.71197		-0.8887	-3.79371		-0.8887	-3.75845		-0.8897	-3.75471				-0.8921	-3.70664		-0.8888	-3.77833		-0.8871
	-0.9052	-3.82218		-0.9052	-3.82218		-0.9052	-3.82218		-0.9052	-3.82218				-0.8916	-3.7469		-0.888	-3.79507		-0.8881	-3.76955		-0.8892	-3.77051				-0.8908	-3.71874		-0.8879	-3.79452		-0.8879	-3.76751		-0.8889	-3.76026				-0.8913	-3.71287		-0.888	-3.78436		-0.8863
	-0.9044	-3.82652		-0.9044	-3.82652		-0.9044	-3.82652		-0.9044	-3.82652				-0.8908	-3.75105		-0.8872	-3.79697		-0.8873	-3.76828		-0.8884	-3.7721				-0.8899	-3.72331		-0.887	-3.7997		-0.8871	-3.77211		-0.888	-3.76504				-0.8905	-3.71851		-0.8872	-3.79075		-0.8854
	-0.9036	-3.83121		-0.9036	-3.83121		-0.9036	-3.83121		-0.9036	-3.83121				-0.89	-3.75375		-0.8863	-3.7967		-0.8864	-3.77134		-0.8876	-3.77393				-0.8891	-3.72769		-0.8862	-3.80355		-0.8862	-3.77728		-0.8872	-3.76951				-0.8897	-3.72423		-0.8864	-3.79425		-0.8846
	-0.9027	-3.83565		-0.9027	-3.83565		-0.9027	-3.83565		-0.9027	-3.83565				-0.8892	-3.75945		-0.8855	-3.80355		-0.8856	-3.77911		-0.8868	-3.7807				-0.8883	-3.73353		-0.8854	-3.80355		-0.8854	-3.78068		-0.8864	-3.77259				-0.8888	-3.73072		-0.8855	-3.79724		-0.8838
	-0.9019	-3.83983		-0.9019	-3.83983		-0.9019	-3.83983		-0.9019	-3.83983				-0.8883	-3.7665		-0.8847	-3.80024		-0.8848	-3.78489		-0.8859	-3.78388				-0.8874	-3.73921		-0.8846	-3.81079		-0.8846	-3.78252		-0.8855	-3.77751				-0.888	-3.73589		-0.8847	-3.79997		-0.8829
	-0.9011	-3.84406		-0.9011	-3.84406		-0.9011	-3.84406		-0.9011	-3.84406				-0.8875	-3.77263		-0.8838	-3.80079		-0.8839	-3.79022		-0.8851	-3.78788				-0.8866	-3.74545		-0.8837	-3.81816		-0.8837	-3.78489		-0.8847	-3.78283				-0.8872	-3.74088		-0.8838	-3.80327		-0.8821
	-0.9002	-3.84771		-0.9002	-3.84771		-0.9002	-3.84771		-0.9002	-3.84771				-0.8867	-3.7778		-0.883	-3.79778		-0.8831	-3.79833		-0.8843	-3.79131				-0.8858	-3.75203		-0.8829	-3.82074		-0.8829	-3.78861		-0.8839	-3.78712				-0.8863	-3.74715		-0.883	-3.8066		-0.8813
	-0.8994	-3.85109		-0.8994	-3.85109		-0.8994	-3.85109		-0.8994	-3.85109				-0.8858	-3.78225		-0.8822	-3.79344		-0.8823	-3.8041		-0.8834	-3.79327				-0.885	-3.7587		-0.8821	-3.81901		-0.8821	-3.7929		-0.8831	-3.79021				-0.8855	-3.75326		-0.8822	-3.80883		-0.8805
	-0.8986	-3.85449		-0.8986	-3.85449		-0.8986	-3.85449		-0.8986	-3.85449				-0.885	-3.78357		-0.8814	-3.80107		-0.8814	-3.80549		-0.8826	-3.79671				-0.8841	-3.76548		-0.8812	-3.81079		-0.8813	-3.79642		-0.8822	-3.7909				-0.8847	-3.7597		-0.8814	-3.81163		-0.8796
	-0.8978	-3.85761		-0.8978	-3.85761		-0.8978	-3.85761		-0.8978	-3.85761				-0.8842	-3.78489		-0.8805	-3.81079		-0.8806	-3.80493		-0.8818	-3.8002				-0.8833	-3.77211		-0.8804	-3.80967		-0.8804	-3.7986		-0.8814	-3.79346				-0.8838	-3.76675		-0.8805	-3.81787		-0.8788
	-0.8969	-3.86107		-0.8969	-3.86107		-0.8969	-3.86107		-0.8969	-3.86107				-0.8833	-3.78915		-0.8797	-3.82218		-0.8798	-3.80382		-0.8809	-3.80505				-0.8825	-3.77859		-0.8796	-3.81333		-0.8796	-3.80244		-0.8806	-3.79812				-0.883	-3.77263		-0.8797	-3.82218		-0.878
	-0.8961	-3.86455		-0.8961	-3.86455		-0.8961	-3.86455		-0.8961	-3.86455				-0.8825	-3.79534		-0.8789	-3.82769		-0.879	-3.80244		-0.8801	-3.80849				-0.8816	-3.7841		-0.8788	-3.81987		-0.8788	-3.80493		-0.8797	-3.80297				-0.8822	-3.77754		-0.8789	-3.82594		-0.8771
	-0.8953	-3.86806		-0.8953	-3.86806		-0.8953	-3.86806		-0.8953	-3.86806				-0.8817	-3.80134		-0.878	-3.82478		-0.8781	-3.80189		-0.8793	-3.80934				-0.8808	-3.78781		-0.8779	-3.82798		-0.8779	-3.80827		-0.8789	-3.80802				-0.8814	-3.78252		-0.8781	-3.83003		-0.8763
	-0.8944	-3.87192		-0.8944	-3.87192		-0.8944	-3.87192		-0.8944	-3.87192				-0.8808	-3.80549		-0.8772	-3.81417		-0.8773	-3.8066		-0.8784	-3.80875				-0.88	-3.79075		-0.8771	-3.83268		-0.8771	-3.81389		-0.8781	-3.81244				-0.8805	-3.78516		-0.8772	-3.83298		-0.8755
	-0.8936	-3.87582		-0.8936	-3.87582		-0.8936	-3.87582		-0.8936	-3.87582				-0.88	-3.81051		-0.8764	-3.81759		-0.8765	-3.81645		-0.8776	-3.81485				-0.8791	-3.79398		-0.8762	-3.83803		-0.8763	-3.81248		-0.8772	-3.81483				-0.8797	-3.78728		-0.8764	-3.83446		-0.8746
	-0.8928	-3.87943		-0.8928	-3.87943		-0.8928	-3.87943		-0.8928	-3.87943				-0.8792	-3.81588		-0.8755	-3.82478		-0.8756	-3.82769		-0.8768	-3.82278				-0.8783	-3.79642		-0.8754	-3.84285		-0.8754	-3.80911		-0.8764	-3.81613				-0.8789	-3.78941		-0.8756	-3.83714		-0.8738
	-0.8919	-3.88339		-0.8919	-3.88339		-0.8919	-3.88339		-0.8919	-3.88339				-0.8784	-3.82016		-0.8747	-3.82886		-0.8748	-3.8315		-0.876	-3.82684				-0.8775	-3.7986		-0.8746	-3.84436		-0.8746	-3.81417		-0.8756	-3.81905				-0.878	-3.79371		-0.8747	-3.84043		-0.873
	-0.8911	-3.88673		-0.8911	-3.88673		-0.8911	-3.88673		-0.8911	-3.88673				-0.8775	-3.82391		-0.8739	-3.83091		-0.874	-3.83209		-0.8751	-3.82897				-0.8766	-3.8041		-0.8738	-3.84741		-0.8738	-3.8193		-0.8747	-3.8236				-0.8772	-3.80217		-0.8739	-3.84436		-0.8721
	-0.8903	-3.89042		-0.8903	-3.89042		-0.8903	-3.89042		-0.8903	-3.89042				-0.8767	-3.82769		-0.8731	-3.82944		-0.8731	-3.82681		-0.8743	-3.82798				-0.8758	-3.80995		-0.873	-3.84466		-0.873	-3.82275		-0.8739	-3.82579				-0.8764	-3.80967		-0.8731	-3.84986		-0.8713
	-0.8895	-3.89415		-0.8895	-3.89415		-0.8895	-3.89415		-0.8895	-3.89415				-0.8759	-3.83121		-0.8722	-3.83714		-0.8723	-3.82652		-0.8735	-3.83162				-0.875	-3.81588		-0.8721	-3.84164		-0.8721	-3.82769		-0.8731	-3.8284				-0.8755	-3.81702		-0.8722	-3.85543		-0.8705
	-0.8886	-3.89825		-0.8886	-3.89825		-0.8886	-3.89825		-0.8886	-3.89825				-0.8751	-3.83239		-0.8714	-3.83983		-0.8715	-3.82857		-0.8727	-3.8336				-0.8741	-3.8216		-0.8713	-3.84588		-0.8713	-3.83416		-0.8722	-3.83388				-0.8747	-3.82304		-0.8714	-3.86044		-0.8696
	-0.8878	-3.90205		-0.8878	-3.90205		-0.8878	-3.90205		-0.8878	-3.90205				-0.8742	-3.83565		-0.8706	-3.84588		-0.8706	-3.82478		-0.8718	-3.83544				-0.8733	-3.82652		-0.8704	-3.85387		-0.8704	-3.83062		-0.8714	-3.837				-0.8739	-3.82681		-0.8706	-3.86455		-0.8688
	-0.887	-3.90553		-0.887	-3.90553		-0.887	-3.90553		-0.887	-3.90553				-0.8734	-3.83923		-0.8697	-3.85636		-0.8698	-3.82449		-0.871	-3.84003				-0.8725	-3.83033		-0.8696	-3.86201		-0.8696	-3.8242		-0.8706	-3.83885				-0.8731	-3.82915		-0.8697	-3.86838		-0.868
	-0.8861	-3.90904		-0.8861	-3.90904		-0.8861	-3.90904		-0.8861	-3.90904				-0.8726	-3.84254		-0.8689	-3.86012		-0.869	-3.82275		-0.8702	-3.84181				-0.8717	-3.83476		-0.8688	-3.87063		-0.8688	-3.82886		-0.8698	-3.84475				-0.8722	-3.83416		-0.8689	-3.87031		-0.8672
	-0.8853	-3.91222		-0.8853	-3.91222		-0.8853	-3.91222		-0.8853	-3.91222				-0.8717	-3.84863		-0.8681	-3.8636		-0.8682	-3.8315		-0.8693	-3.84791				-0.8708	-3.83953		-0.868	-3.87517		-0.868	-3.83416		-0.8689	-3.84962				-0.8714	-3.83863		-0.8681	-3.87063		-0.8663
	-0.8845	-3.91542		-0.8845	-3.91542		-0.8845	-3.91542		-0.8845	-3.91542				-0.8709	-3.85449		-0.8672	-3.86806		-0.8673	-3.84224		-0.8685	-3.85493				-0.87	-3.84436		-0.8671	-3.87746		-0.8671	-3.84103		-0.8681	-3.85428				-0.8705	-3.84436		-0.8673	-3.87322		-0.8655
	-0.8836	-3.91901		-0.8836	-3.91901		-0.8836	-3.91901		-0.8836	-3.91901				-0.8701	-3.85918		-0.8664	-3.87517		-0.8665	-3.85078		-0.8677	-3.86171				-0.8691	-3.85017		-0.8663	-3.86999		-0.8663	-3.85017		-0.8672	-3.85677				-0.8697	-3.85017		-0.8664	-3.87877		-0.8647
	-0.8828	-3.92191		-0.8828	-3.92191		-0.8828	-3.92191		-0.8828	-3.92191				-0.8692	-3.86455		-0.8656	-3.87484		-0.8657	-3.85511		-0.8668	-3.86484				-0.8683	-3.85574		-0.8655	-3.86265		-0.8655	-3.8514		-0.8664	-3.85659				-0.8689	-3.8548		-0.8656	-3.88506		-0.8639
	-0.882	-3.92518		-0.882	-3.92518		-0.882	-3.92518		-0.882	-3.92518				-0.8684	-3.87063		-0.8648	-3.8755		-0.8649	-3.8548		-0.866	-3.86698				-0.8675	-3.86107		-0.8646	-3.86044		-0.8646	-3.8548		-0.8656	-3.85877				-0.8681	-3.85824		-0.8648	-3.88907		-0.863
	-0.8812	-3.92812		-0.8812	-3.92812		-0.8812	-3.92812		-0.8812	-3.92812				-0.8676	-3.8768		-0.8639	-3.87778		-0.864	-3.85232		-0.8652	-3.86897				-0.8667	-3.86614		-0.8638	-3.86614		-0.8638	-3.85356		-0.8648	-3.86195				-0.8672	-3.86265		-0.8639	-3.89211		-0.8622
	-0.8803	-3.9307		-0.8803	-3.9307		-0.8803	-3.9307		-0.8803	-3.9307				-0.8667	-3.88306		-0.8631	-3.8755		-0.8632	-3.85449		-0.8643	-3.87102				-0.8658	-3.87063		-0.863	-3.87484		-0.863	-3.8468		-0.8639	-3.86409				-0.8664	-3.86806		-0.8631	-3.89517		-0.8614
	-0.8795	-3.9333		-0.8795	-3.9333		-0.8795	-3.9333		-0.8795	-3.9333				-0.8659	-3.88874		-0.8623	-3.8791		-0.8624	-3.85855		-0.8635	-3.87546				-0.865	-3.87322		-0.8622	-3.87811		-0.8622	-3.84741		-0.8631	-3.86625				-0.8656	-3.87257		-0.8623	-3.89825		-0.8605
	-0.8787	-3.93592		-0.8787	-3.93592		-0.8787	-3.93592		-0.8787	-3.93592				-0.8651	-3.8911		-0.8614	-3.88606		-0.8615	-3.86806		-0.8627	-3.88174				-0.8642	-3.87419		-0.8613	-3.87976		-0.8613	-3.85636		-0.8623	-3.8701				-0.8648	-3.87615		-0.8615	-3.90066		-0.8597
	-0.8778	-3.93855		-0.8778	-3.93855		-0.8778	-3.93855		-0.8778	-3.93855				-0.8642	-3.88739		-0.8606	-3.88639		-0.8607	-3.88008		-0.8618	-3.88462				-0.8634	-3.87811		-0.8605	-3.88074		-0.8605	-3.86519		-0.8615	-3.87468				-0.8639	-3.88074		-0.8606	-3.90309		-0.8589
	-0.877	-3.94119		-0.877	-3.94119		-0.877	-3.94119		-0.877	-3.94119				-0.8634	-3.88606		-0.8598	-3.89042		-0.8599	-3.88807		-0.861	-3.88818				-0.8625	-3.88339		-0.8597	-3.88372		-0.8597	-3.8671		-0.8606	-3.87807				-0.8631	-3.88572		-0.8598	-3.90448		-0.858
	-0.8762	-3.94386		-0.8762	-3.94386		-0.8762	-3.94386		-0.8762	-3.94386				-0.8626	-3.89008		-0.859	-3.89551		-0.8591	-3.88673		-0.8602	-3.89077				-0.8617	-3.88773		-0.8588	-3.88639		-0.8588	-3.87063		-0.8598	-3.88158				-0.8623	-3.89008		-0.859	-3.90588		-0.8572
	-0.8753	-3.94654		-0.8753	-3.94654		-0.8753	-3.94654		-0.8753	-3.94654				-0.8618	-3.89654		-0.8581	-3.90379		-0.8582	-3.87811		-0.8594	-3.89281				-0.8609	-3.88706		-0.858	-3.89347		-0.858	-3.86838		-0.859	-3.88297				-0.8614	-3.89381		-0.8581	-3.90763		-0.8564
	-0.8745	-3.94923		-0.8745	-3.94923		-0.8745	-3.94923		-0.8745	-3.94923				-0.8609	-3.90309		-0.8573	-3.90066		-0.8574	-3.8824		-0.8585	-3.89538				-0.86	-3.8884		-0.8572	-3.8962		-0.8572	-3.86902		-0.8581	-3.88454				-0.8606	-3.89483		-0.8573	-3.91045		-0.8555
	-0.8737	-3.95156		-0.8737	-3.95156		-0.8737	-3.95156		-0.8737	-3.95156				-0.8601	-3.90868		-0.8564	-3.90518		-0.8565	-3.88074		-0.8577	-3.8982				-0.8592	-3.89279		-0.8563	-3.8962		-0.8563	-3.87063		-0.8573	-3.88654				-0.8598	-3.89483		-0.8565	-3.914		-0.8547
	-0.8729	-3.95429		-0.8729	-3.95429		-0.8729	-3.95429		-0.8729	-3.95429				-0.8593	-3.91116		-0.8556	-3.90728		-0.8557	-3.88706		-0.8569	-3.90183				-0.8584	-3.89791		-0.8555	-3.89688		-0.8555	-3.87031		-0.8565	-3.88837				-0.859	-3.89928		-0.8556	-3.91614		-0.8539
	-0.872	-3.95664		-0.872	-3.95664		-0.872	-3.95664		-0.872	-3.95664				-0.8585	-3.90939		-0.8548	-3.91471		-0.8549	-3.88874		-0.8561	-3.90428				-0.8575	-3.9024		-0.8547	-3.90066		-0.8547	-3.87387		-0.8556	-3.89231				-0.8581	-3.90518		-0.8548	-3.91829		-0.8531
	-0.8712	-3.9594		-0.8712	-3.9594		-0.8712	-3.9594		-0.8712	-3.9594				-0.8576	-3.90763		-0.854	-3.92191		-0.8541	-3.88673		-0.8552	-3.90542				-0.8567	-3.90763		-0.8539	-3.90483		-0.8539	-3.88406		-0.8548	-3.89884				-0.8573	-3.9108		-0.854	-3.92082		-0.8522
	-0.8703	-3.96218		-0.8703	-3.96218		-0.8703	-3.96218		-0.8703	-3.96218				-0.8568	-3.90939		-0.8531	-3.9201		-0.8532	-3.87877		-0.8544	-3.90275				-0.8559	-3.91364		-0.853	-3.91045		-0.853	-3.88673		-0.854	-3.9036				-0.8564	-3.91578		-0.8531	-3.92482		-0.8514
	-0.8695	-3.96457		-0.8695	-3.96457		-0.8695	-3.96457		-0.8695	-3.96457				-0.8559	-3.91186		-0.8523	-3.92082		-0.8524	-3.87128		-0.8535	-3.90132				-0.855	-3.91578		-0.8522	-3.90763		-0.8522	-3.88773		-0.8531	-3.90371				-0.8556	-3.91901		-0.8523	-3.92775		-0.8506
	-0.8687	-3.96617		-0.8687	-3.96617		-0.8687	-3.96617		-0.8687	-3.96617				-0.8551	-3.91257		-0.8515	-3.92082		-0.8516	-3.87225		-0.8527	-3.90188				-0.8542	-3.91328		-0.8514	-3.91507		-0.8514	-3.89042		-0.8523	-3.90626				-0.8548	-3.92154		-0.8515	-3.92849		-0.8497
	-0.8679	-3.96819		-0.8679	-3.96819		-0.8679	-3.96819		-0.8679	-3.96819				-0.8543	-3.91542		-0.8506	-3.92518		-0.8507	-3.88372		-0.8519	-3.90811				-0.8534	-3.9165		-0.8505	-3.92227		-0.8505	-3.89076		-0.8515	-3.90984				-0.854	-3.92409		-0.8507	-3.9307		-0.8489
	-0.867	-3.96981		-0.867	-3.96981		-0.867	-3.96981		-0.867	-3.96981				-0.8535	-3.91973		-0.8498	-3.92665		-0.8499	-3.88975		-0.8511	-3.91204				-0.8526	-3.92082		-0.8497	-3.92191		-0.8497	-3.88739		-0.8507	-3.91004				-0.8531	-3.92738		-0.8498	-3.93293		-0.8481
	-0.8662	-3.97102		-0.8662	-3.97102		-0.8662	-3.97102		-0.8662	-3.97102				-0.8526	-3.92592		-0.849	-3.923		-0.8491	-3.89211		-0.8502	-3.91367				-0.8517	-3.92555		-0.8489	-3.91578		-0.8489	-3.89008		-0.8498	-3.91047				-0.8523	-3.92775		-0.849	-3.93219		-0.8473
	-0.8654	-3.97265		-0.8654	-3.97265		-0.8654	-3.97265		-0.8654	-3.97265				-0.8518	-3.93367		-0.8482	-3.92628		-0.8483	-3.89688		-0.8494	-3.91895				-0.8509	-3.92775		-0.848	-3.91435		-0.8481	-3.89415		-0.849	-3.91208				-0.8515	-3.92775		-0.8482	-3.93256		-0.8464
	-0.8645	-3.97388		-0.8645	-3.97388		-0.8645	-3.97388		-0.8645	-3.97388				-0.851	-3.93892		-0.8473	-3.93219		-0.8474	-3.89825		-0.8486	-3.92312				-0.8501	-3.93033		-0.8472	-3.92046		-0.8472	-3.89245		-0.8482	-3.91441				-0.8506	-3.92922		-0.8473	-3.93479		-0.8456
	-0.8637	-3.97551		-0.8637	-3.97551		-0.8637	-3.97551		-0.8637	-3.97551				-0.8501	-3.94233		-0.8465	-3.93667		-0.8466	-3.90623		-0.8477	-3.92841				-0.8493	-3.93293		-0.8464	-3.91865		-0.8464	-3.89483		-0.8474	-3.91547				-0.8498	-3.93144		-0.8465	-3.9393		-0.8447
	-0.8629	-3.97716		-0.8629	-3.97716		-0.8629	-3.97716		-0.8629	-3.97716				-0.8493	-3.94424		-0.8457	-3.92592		-0.8458	-3.90136		-0.8469	-3.92384				-0.8484	-3.93629		-0.8455	-3.92738		-0.8455	-3.89928		-0.8465	-3.92099				-0.849	-3.93479		-0.8457	-3.94195		-0.8439
	-0.8621	-3.9784		-0.8621	-3.9784		-0.8621	-3.9784		-0.8621	-3.9784				-0.8485	-3.945		-0.8448	-3.92885		-0.8449	-3.90101		-0.8461	-3.92496				-0.8476	-3.93817		-0.8447	-3.93107		-0.8447	-3.90274		-0.8457	-3.924				-0.8482	-3.93968		-0.8449	-3.945		-0.8431
	-0.8612	-3.98005		-0.8612	-3.98005		-0.8612	-3.98005		-0.8612	-3.98005				-0.8477	-3.94462		-0.844	-3.93405		-0.8441	-3.90974		-0.8453	-3.92947				-0.8468	-3.93817		-0.8439	-3.92885		-0.8439	-3.90833		-0.8449	-3.92512				-0.8473	-3.945		-0.844	-3.94654		-0.8423
	-0.8604	-3.9813		-0.8604	-3.9813		-0.8604	-3.9813		-0.8604	-3.9813				-0.8468	-3.94615		-0.8432	-3.93629		-0.8433	-3.91186		-0.8444	-3.93144				-0.8459	-3.93968		-0.8431	-3.92775		-0.8431	-3.91364		-0.844	-3.92702				-0.8465	-3.94846		-0.8432	-3.94846		-0.8414
	-0.8596	-3.98213		-0.8596	-3.98213		-0.8596	-3.98213		-0.8596	-3.98213				-0.846	-3.95195		-0.8423	-3.93517		-0.8424	-3.91364		-0.8436	-3.93358				-0.8451	-3.94271		-0.8422	-3.92996		-0.8422	-3.91829		-0.8432	-3.93032				-0.8457	-3.94654		-0.8423	-3.9539		-0.8406
	-0.8588	-3.98338		-0.8588	-3.98338		-0.8588	-3.98338		-0.8588	-3.98338				-0.8451	-3.95782		-0.8415	-3.93405		-0.8416	-3.91757		-0.8427	-3.93648				-0.8443	-3.94577		-0.8414	-3.92885		-0.8414	-3.92227		-0.8424	-3.9323				-0.8448	-3.94615		-0.8415	-3.96019		-0.8398
	-0.8579	-3.98464		-0.8579	-3.98464		-0.8579	-3.98464		-0.8579	-3.98464				-0.8443	-3.96178		-0.8407	-3.94233		-0.8408	-3.91937		-0.8419	-3.94116				-0.8434	-3.94731		-0.8406	-3.92959		-0.8406	-3.92445		-0.8415	-3.93378				-0.844	-3.94962		-0.8407	-3.96658		-0.8389
	-0.8571	-3.9859		-0.8571	-3.9859		-0.8571	-3.9859		-0.8571	-3.9859				-0.8435	-3.96617		-0.8399	-3.94577		-0.84	-3.91542		-0.8411	-3.94246				-0.8426	-3.94923		-0.8397	-3.93855		-0.8398	-3.9201		-0.8407	-3.93596				-0.8432	-3.95311		-0.8399	-3.97306		-0.8381
	-0.8563	-3.98716		-0.8563	-3.98716		-0.8563	-3.98716		-0.8563	-3.98716				-0.8427	-3.96417		-0.839	-3.9535		-0.8391	-3.92482		-0.8403	-3.9475				-0.8418	-3.95195		-0.8389	-3.94006		-0.8389	-3.91507		-0.8399	-3.93569				-0.8423	-3.95585		-0.839	-3.97922		-0.8373
	-0.8554	-3.98843		-0.8554	-3.98843		-0.8554	-3.98843		-0.8554	-3.98843				-0.8418	-3.96098		-0.8382	-3.95078		-0.8383	-3.93779		-0.8394	-3.94985				-0.841	-3.95468		-0.8381	-3.93554		-0.8381	-3.91435		-0.8391	-3.93486				-0.8415	-3.95782		-0.8382	-3.9838		-0.8365
	-0.8546	-3.98928		-0.8546	-3.98928		-0.8546	-3.98928		-0.8546	-3.98928				-0.841	-3.96178		-0.8374	-3.95273		-0.8375	-3.93742		-0.8386	-3.95064				-0.8401	-3.95821		-0.8373	-3.93892		-0.8373	-3.91865		-0.8382	-3.9386				-0.8407	-3.96098		-0.8374	-3.98632		-0.8356
	-0.8538	-3.9897		-0.8538	-3.9897		-0.8538	-3.9897		-0.8538	-3.9897				-0.8402	-3.96497		-0.8365	-3.94577		-0.8366	-3.92996		-0.8378	-3.9469				-0.8393	-3.96218		-0.8364	-3.9431		-0.8364	-3.92263		-0.8374	-3.94263				-0.8399	-3.96577		-0.8366	-3.98716		-0.8348
	-0.8529	-3.99097		-0.8529	-3.99097		-0.8529	-3.99097		-0.8529	-3.99097				-0.8394	-3.96698		-0.8357	-3.92555		-0.8358	-3.9333		-0.837	-3.94194				-0.8385	-3.96377		-0.8356	-3.94539		-0.8356	-3.92812		-0.8366	-3.94576				-0.839	-3.9694		-0.8357	-3.98843		-0.834
	-0.8521	-3.99225		-0.8521	-3.99225		-0.8521	-3.99225		-0.8521	-3.99225				-0.8385	-3.96859		-0.8349	-3.92518		-0.835	-3.93405		-0.8361	-3.94261				-0.8376	-3.96377		-0.8348	-3.94846		-0.8348	-3.93181		-0.8357	-3.94802				-0.8382	-3.97143		-0.8349	-3.98885		-0.8332
	-0.8513	-3.99353		-0.8513	-3.99353		-0.8513	-3.99353		-0.8513	-3.99353				-0.8377	-3.96859		-0.8341	-3.93442		-0.8341	-3.93892		-0.8353	-3.94731				-0.8368	-3.96738		-0.8339	-3.95468		-0.834	-3.93629		-0.8349	-3.95278				-0.8374	-3.97347		-0.8341	-3.98548		-0.8323
	-0.8504	-3.99525		-0.8504	-3.99525		-0.8504	-3.99525		-0.8504	-3.99525				-0.8369	-3.96819		-0.8332	-3.94271		-0.8333	-3.94539		-0.8345	-3.9521				-0.836	-3.97306		-0.8331	-3.96218		-0.8331	-3.9431		-0.8341	-3.95944				-0.8366	-3.97551		-0.8332	-3.97922		-0.8315
	-0.8496	-3.99654		-0.8496	-3.99654		-0.8496	-3.99654		-0.8496	-3.99654				-0.836	-3.96698		-0.8324	-3.95234		-0.8325	-3.94923		-0.8336	-3.95618				-0.8352	-3.97881		-0.8323	-3.96497		-0.8323	-3.94424		-0.8333	-3.96267				-0.8357	-3.97922		-0.8324	-3.97634		-0.8306
	-0.8488	-3.99827		-0.8488	-3.99827		-0.8488	-3.99827		-0.8488	-3.99827				-0.8352	-3.97265		-0.8316	-3.95782		-0.8317	-3.94577		-0.8328	-3.95875				-0.8343	-3.98172		-0.8314	-3.96617		-0.8314	-3.94462		-0.8324	-3.96417				-0.8349	-3.9813		-0.8316	-3.97798		-0.8298
	-0.848	-3.99957		-0.848	-3.99957		-0.848	-3.99957		-0.848	-3.99957				-0.8344	-3.97798		-0.8307	-3.96497		-0.8308	-3.94386		-0.832	-3.96227				-0.8335	-3.98005		-0.8306	-3.96577		-0.8306	-3.95234		-0.8316	-3.96605				-0.834	-3.98422		-0.8307	-3.97964		-0.829
	-0.8471	-4.00117		-0.8471	-4.00117		-0.8471	-4.00117		-0.8471	-4.00117				-0.8336	-3.98088		-0.8299	-3.9694		-0.83	-3.94923		-0.8312	-3.96651				-0.8326	-3.97881		-0.8298	-3.96698		-0.8298	-3.95195		-0.8307	-3.96591				-0.8332	-3.98801		-0.8299	-3.98172		-0.8282
	-0.8463	-4.00288		-0.8463	-4.00288		-0.8463	-4.00288		-0.8463	-4.00288				-0.8327	-3.98338		-0.8291	-3.97428		-0.8292	-3.95624		-0.8303	-3.9713				-0.8318	-3.98088		-0.829	-3.96178		-0.829	-3.95311		-0.8299	-3.96526				-0.8324	-3.99268		-0.8291	-3.98464		-0.8273
	-0.8454	-4.00458		-0.8454	-4.00458		-0.8454	-4.00458		-0.8454	-4.00458				-0.8319	-3.98464		-0.8282	-3.97021		-0.8283	-3.96257		-0.8295	-3.97247				-0.831	-3.98674		-0.8281	-3.96698		-0.8281	-3.95468		-0.8291	-3.96947				-0.8316	-3.99783		-0.8283	-3.98422		-0.8265
	-0.8446	-4.00661		-0.8446	-4.00661		-0.8446	-4.00661		-0.8446	-4.00661				-0.831	-3.98928		-0.8274	-3.97021		-0.8275	-3.9694		-0.8286	-3.9763				-0.8302	-3.99311		-0.8273	-3.97265		-0.8273	-3.95234		-0.8283	-3.9727				-0.8307	-4.00144		-0.8274	-3.9838		-0.8257
	-0.8438	-4.00851		-0.8438	-4.00851		-0.8438	-4.00851		-0.8438	-4.00851				-0.8302	-3.99396		-0.8266	-3.96537		-0.8267	-3.96778		-0.8278	-3.97571				-0.8293	-3.99827		-0.8265	-3.96738		-0.8265	-3.95156		-0.8274	-3.9724				-0.8299	-4.00529		-0.8266	-3.98843		-0.8248
	-0.843	-4.01064		-0.843	-4.01064		-0.843	-4.01064		-0.843	-4.01064				-0.8294	-4		-0.8257	-3.96377		-0.8258	-3.9594		-0.827	-3.97439				-0.8285	-4.0027		-0.8256	-3.97347		-0.8257	-3.9539		-0.8266	-3.97669				-0.8291	-4.00749		-0.8258	-3.99568		-0.824
	-0.8421	-4.01274		-0.8421	-4.01274		-0.8421	-4.01274		-0.8421	-4.01274				-0.8286	-4.00432		-0.8249	-3.97102		-0.825	-3.95507		-0.8262	-3.9768				-0.8277	-4.00366		-0.8248	-3.969		-0.8248	-3.95429		-0.8258	-3.97565				-0.8282	-4.00979		-0.8249	-4.00353		-0.8232
	-0.8413	-4.0148		-0.8413	-4.0148		-0.8413	-4.0148		-0.8413	-4.0148				-0.8277	-4.00771		-0.8241	-3.97675		-0.8242	-3.95273		-0.8253	-3.97906				-0.8268	-4.00458		-0.824	-3.969		-0.824	-3.96377		-0.8249	-3.97912				-0.8274	-4.00891		-0.8241	-4.009		-0.8224
	-0.8405	-4.01719		-0.8405	-4.01719		-0.8405	-4.01719		-0.8405	-4.01719				-0.8269	-4.01055		-0.8233	-3.98338		-0.8234	-3.95234		-0.8245	-3.98209				-0.826	-4.00855		-0.8232	-3.97143		-0.8232	-3.97184		-0.8241	-3.98394				-0.8266	-4.00723		-0.8233	-4.00423		-0.8215
	-0.8397	-4.01913		-0.8397	-4.01913		-0.8397	-4.01913		-0.8397	-4.01913				-0.8261	-4.01242		-0.8224	-3.98674		-0.8225	-3.95234		-0.8237	-3.98383				-0.8252	-4.007		-0.8223	-3.97265		-0.8223	-3.97593		-0.8233	-3.98519				-0.8258	-4.00855		-0.8225	-3.99913		-0.8207
	-0.8388	-4.02114		-0.8388	-4.02114		-0.8388	-4.02114		-0.8388	-4.02114				-0.8253	-4.01547		-0.8216	-3.98422		-0.8217	-3.95624		-0.8229	-3.98531				-0.8244	-4.00577		-0.8215	-3.97716		-0.8215	-3.96819		-0.8225	-3.98371				-0.8249	-4.01278		-0.8216	-4.00056		-0.8199
	-0.838	-4.02283		-0.838	-4.02283		-0.838	-4.02283		-0.838	-4.02283				-0.8244	-4.01963		-0.8208	-3.98716		-0.8209	-3.95546		-0.822	-3.98742				-0.8235	-4.00599		-0.8207	-3.97757		-0.8207	-3.96417		-0.8216	-3.98258				-0.8241	-4.01786		-0.8208	-4.00379		-0.819
	-0.8372	-4.02461		-0.8372	-4.02461		-0.8372	-4.02461		-0.8372	-4.02461				-0.8236	-4.02319		-0.8199	-3.99482		-0.8201	-3.96138		-0.8212	-3.99313				-0.8227	-4.00971		-0.8198	-3.97469		-0.8198	-3.9751		-0.8208	-3.9865				-0.8233	-4.01922		-0.82	-4.00555		-0.8182
	-0.8363	-4.02641		-0.8363	-4.02641		-0.8363	-4.02641		-0.8363	-4.02641				-0.8228	-4.02356		-0.8191	-4.00274		-0.8192	-3.969		-0.8204	-3.99843				-0.8219	-4.01082		-0.819	-3.98297		-0.819	-3.98255		-0.82	-3.99211				-0.8224	-4.02		-0.8191	-4.00904		-0.8174
	-0.8355	-4.02808		-0.8355	-4.02808		-0.8355	-4.02808		-0.8355	-4.02808				-0.8219	-4.01941		-0.8183	-4.01426		-0.8184	-3.97593		-0.8195	-4.0032				-0.821	-4.01229		-0.8182	-3.99097		-0.8182	-3.9859		-0.8191	-3.99639				-0.8216	-4.02032		-0.8183	-4.01471		-0.8166
	-0.8347	-4.02956		-0.8347	-4.02956		-0.8347	-4.02956		-0.8347	-4.02956				-0.8211	-4.01579		-0.8175	-4.0254		-0.8176	-3.9813		-0.8187	-4.00749				-0.8202	-4.01615		-0.8174	-3.99913		-0.8174	-3.99012		-0.8183	-4.0018				-0.8208	-4.01633		-0.8175	-4.0171		-0.8157
	-0.8339	-4.03105		-0.8339	-4.03105		-0.8339	-4.03105		-0.8339	-4.03105				-0.8203	-4.01764		-0.8166	-4.02715		-0.8167	-3.98548		-0.8179	-4.01009				-0.8194	-4.01954		-0.8165	-4.00533		-0.8165	-3.99268		-0.8175	-4.00585				-0.8199	-4.01601		-0.8166	-4.0166		-0.8149
	-0.833	-4.03255		-0.833	-4.03255		-0.833	-4.03255		-0.833	-4.03255				-0.8194	-4.02059		-0.8158	-4.02004		-0.8159	-3.98758		-0.817	-4.0094				-0.8186	-4.02205		-0.8157	-4.00745		-0.8157	-3.99654		-0.8167	-4.00868				-0.8191	-4.01986		-0.8158	-4.01827		-0.8141
	-0.8322	-4.03423		-0.8322	-4.03423		-0.8322	-4.03423		-0.8322	-4.03423				-0.8186	-4.02283		-0.815	-4.02752		-0.8151	-3.9897		-0.8162	-4.01335				-0.8177	-4.02549		-0.8149	-4.00811		-0.8149	-4.002		-0.8158	-4.01187				-0.8183	-4.02292		-0.815	-4.02337		-0.8132
	-0.8314	-4.03565		-0.8314	-4.03565		-0.8314	-4.03565		-0.8314	-4.03565				-0.8178	-4.02411		-0.8142	-4.029		-0.8142	-3.98801		-0.8154	-4.01371				-0.8169	-4.02868		-0.8141	-4.01592		-0.814	-4.00559		-0.815	-4.01673				-0.8175	-4.02623		-0.8142	-4.02826		-0.8124
	-0.8305	-4.03702		-0.8305	-4.03702		-0.8305	-4.03702		-0.8305	-4.03702				-0.817	-4.02678		-0.8133	-4.03433		-0.8134	-3.98801		-0.8146	-4.01637				-0.8161	-4.0304		-0.8132	-4.02214		-0.8132	-4.00113		-0.8142	-4.01789				-0.8166	-4.03161		-0.8133	-4.03021		-0.8116
	-0.8297	-4.03844		-0.8297	-4.03844		-0.8297	-4.03844		-0.8297	-4.03844				-0.8161	-4.03301		-0.8125	-4.03438		-0.8126	-3.99225		-0.8137	-4.01988				-0.8152	-4.02563		-0.8124	-4.01863		-0.8124	-4.00393		-0.8133	-4.01606				-0.8158	-4.03503		-0.8125	-4.03287		-0.8108
	-0.8289	-4.03972		-0.8289	-4.03972		-0.8289	-4.03972		-0.8289	-4.03972				-0.8153	-4.03763		-0.8117	-4.03782		-0.8118	-3.99957		-0.8129	-4.02501				-0.8144	-4.02553		-0.8115	-4.02059		-0.8115	-4.00039		-0.8125	-4.0155				-0.815	-4.03796		-0.8117	-4.03161		-0.8099
	-0.828	-4.0411		-0.828	-4.0411		-0.828	-4.0411		-0.828	-4.0411				-0.8145	-4.04015		-0.8108	-4.03763		-0.8109	-3.99827		-0.8121	-4.02535				-0.8136	-4.03194		-0.8107	-4.02136		-0.8107	-3.99611		-0.8117	-4.01647				-0.8142	-4.04239		-0.8109	-4.0332		-0.8091
	-0.8272	-4.04239		-0.8272	-4.04239		-0.8272	-4.04239		-0.8272	-4.04239				-0.8137	-4.04101		-0.81	-4.03768		-0.8101	-3.99913		-0.8113	-4.02594				-0.8127	-4.03943		-0.8099	-4.01628		-0.8099	-3.9987		-0.8108	-4.01814				-0.8133	-4.04489		-0.81	-4.03815		-0.8083
	-0.8264	-4.04388		-0.8264	-4.04388		-0.8264	-4.04388		-0.8264	-4.04388				-0.8128	-4.03977		-0.8092	-4.04576		-0.8093	-4.00183		-0.8104	-4.02912				-0.8119	-4.04499		-0.8091	-4.01886		-0.8091	-3.99783		-0.81	-4.02056				-0.8125	-4.04571		-0.8092	-4.04062		-0.8074
	-0.8255	-4.04552		-0.8255	-4.04552		-0.8255	-4.04552		-0.8255	-4.04552				-0.812	-4.03598		-0.8083	-4.05306		-0.8084	-4.00344		-0.8096	-4.03083				-0.8111	-4.0476		-0.8082	-4.02618		-0.8082	-4.00056		-0.8092	-4.02478				-0.8117	-4.04648		-0.8084	-4.04091		-0.8066
	-0.8247	-4.04716		-0.8247	-4.04716		-0.8247	-4.04716		-0.8247	-4.04716				-0.8112	-4.03773		-0.8075	-4.05665		-0.8076	-3.99783		-0.8088	-4.03074				-0.8103	-4.05041		-0.8074	-4.02512		-0.8074	-4.00731		-0.8084	-4.02762				-0.8109	-4.04465		-0.8075	-4.04503		-0.8058
	-0.8239	-4.04891		-0.8239	-4.04891		-0.8239	-4.04891		-0.8239	-4.04891				-0.8103	-4.0365		-0.8067	-4.06318		-0.8067	-4.00226		-0.8079	-4.03398				-0.8094	-4.05483		-0.8066	-4.03358		-0.8066	-4.01296		-0.8075	-4.03379				-0.81	-4.04677		-0.8067	-4.05315		-0.8049
	-0.823	-4.05056		-0.823	-4.05056		-0.823	-4.05056		-0.823	-4.05056				-0.8095	-4.03635		-0.8059	-4.05626		-0.8059	-4.00869		-0.8071	-4.03377				-0.8086	-4.05809		-0.8057	-4.04001		-0.8057	-4.0118		-0.8067	-4.03663				-0.8092	-4.05051		-0.8059	-4.06088		-0.8041
	-0.8222	-4.05252		-0.8222	-4.05252		-0.8222	-4.05252		-0.8222	-4.05252				-0.8087	-4.04034		-0.805	-4.05173		-0.8051	-4.01868		-0.8063	-4.03692				-0.8078	-4.06188		-0.8049	-4.04605		-0.8049	-4.01507		-0.8059	-4.041				-0.8083	-4.0537		-0.805	-4.06854		-0.8033
	-0.8214	-4.05438		-0.8214	-4.05438		-0.8214	-4.05438		-0.8214	-4.05438				-0.8078	-4.04605		-0.8042	-4.05404		-0.8043	-4.0157		-0.8054	-4.03859				-0.8069	-4.06611		-0.8041	-4.03621		-0.8041	-4.01913		-0.805	-4.04048				-0.8075	-4.05884		-0.8042	-4.07325		-0.8025
	-0.8206	-4.05641		-0.8206	-4.05641		-0.8206	-4.05641		-0.8206	-4.05641				-0.807	-4.05311		-0.8033	-4.06208		-0.8034	-4.01583		-0.8046	-4.04367				-0.8061	-4.06651		-0.8032	-4.02535		-0.8032	-4.02305		-0.8042	-4.03831				-0.8067	-4.06298		-0.8034	-4.07712		-0.8016
	-0.8197	-4.05814		-0.8197	-4.05814		-0.8197	-4.05814		-0.8197	-4.05814				-0.8062	-4.05948		-0.8025	-4.07022		-0.8026	-4.00419		-0.8038	-4.04463				-0.8053	-4.06727		-0.8024	-4.02512		-0.8024	-4.02018		-0.8034	-4.03752				-0.8058	-4.06753		-0.8026	-4.08076		-0.8008
	-0.8189	-4.05983		-0.8189	-4.05983		-0.8189	-4.05983		-0.8189	-4.05983				-0.8053	-4.06505		-0.8017	-4.08019		-0.8018	-4.00833		-0.8029	-4.05119				-0.8044	-4.06875		-0.8016	-4.03678		-0.8016	-4.01471		-0.8025	-4.04008				-0.805	-4.07166		-0.8017	-4.08339		-0.8
	-0.8181	-4.06113		-0.8181	-4.06113		-0.8181	-4.06113		-0.8181	-4.06113				-0.8045	-4.07053		-0.8009	-4.08228		-0.801	-4.01051		-0.8021	-4.05444				-0.8036	-4.06992		-0.8008	-4.04359		-0.8008	-4.02177		-0.8017	-4.04509				-0.8042	-4.07624		-0.8009	-4.08244		-0.7991
	-0.8173	-4.06258		-0.8173	-4.06258		-0.8173	-4.06258		-0.8173	-4.06258				-0.8037	-4.07536		-0.8	-4.07951		-0.8001	-4.01493		-0.8013	-4.0566				-0.8028	-4.07033		-0.7999	-4.05262		-0.7999	-4.02998		-0.8009	-4.05097				-0.8033	-4.07665		-0.8001	-4.07977		-0.7983
	-0.8164	-4.06384		-0.8164	-4.06384		-0.8164	-4.06384		-0.8164	-4.06384				-0.8029	-4.07894		-0.7992	-4.08202		-0.7993	-4.01502		-0.8005	-4.05866				-0.802	-4.07284		-0.7991	-4.05448		-0.7991	-4.03616		-0.8001	-4.05449				-0.8025	-4.07263		-0.7992	-4.08291		-0.7975
	-0.8156	-4.0651		-0.8156	-4.0651		-0.8156	-4.0651		-0.8156	-4.0651				-0.802	-4.07972		-0.7984	-4.0792		-0.7985	-4.02374		-0.7996	-4.06089				-0.8011	-4.07495		-0.7983	-4.05968		-0.7983	-4.03853		-0.7992	-4.05772				-0.8017	-4.07258		-0.7984	-4.08539		-0.7966
	-0.8148	-4.06651		-0.8148	-4.06651		-0.8148	-4.06651		-0.8148	-4.06651				-0.8012	-4.07748		-0.7976	-4.07837		-0.7977	-4.03344		-0.7988	-4.06309				-0.8003	-4.07753		-0.7974	-4.06048		-0.7974	-4.04359		-0.7984	-4.06054				-0.8009	-4.07639		-0.7976	-4.08402		-0.7958
	-0.814	-4.06788		-0.814	-4.06788		-0.814	-4.06788		-0.814	-4.06788				-0.8004	-4.07639		-0.7967	-4.07831		-0.7968	-4.04201		-0.798	-4.06557				-0.7995	-4.08014		-0.7966	-4.06324		-0.7966	-4.04595		-0.7976	-4.06311				-0.8	-4.08239		-0.7967	-4.08234		-0.795
	-0.8131	-4.06946		-0.8131	-4.06946		-0.8131	-4.06946		-0.8131	-4.06946				-0.7995	-4.075		-0.7959	-4.07795		-0.796	-4.0447		-0.7971	-4.06588				-0.7987	-4.07998		-0.7958	-4.06687		-0.7958	-4.04475		-0.7968	-4.06386				-0.7992	-4.0856		-0.7959	-4.0846		-0.7941
	-0.8123	-4.07079		-0.8123	-4.07079		-0.8123	-4.07079		-0.8123	-4.07079				-0.7987	-4.07769		-0.7951	-4.07753		-0.7951	-4.05675		-0.7963	-4.07066				-0.7978	-4.07831		-0.7949	-4.06778		-0.795	-4.05085		-0.7959	-4.06565				-0.7984	-4.08741		-0.7951	-4.09178		-0.7933
	-0.8115	-4.07222		-0.8115	-4.07222		-0.8115	-4.07222		-0.8115	-4.07222				-0.7979	-4.08092		-0.7942	-4.07707		-0.7943	-4.06339		-0.7955	-4.07379				-0.797	-4.08134		-0.7941	-4.06038		-0.7941	-4.05621		-0.7951	-4.06598				-0.7976	-4.0897		-0.7942	-4.09931		-0.7925
	-0.8106	-4.07366		-0.8106	-4.07366		-0.8106	-4.07366		-0.8106	-4.07366				-0.797	-4.0767		-0.7934	-4.07951		-0.7935	-4.06469		-0.7946	-4.07364				-0.7962	-4.0873		-0.7933	-4.05037		-0.7933	-4.06143		-0.7943	-4.06637				-0.7967	-4.09561		-0.7934	-4.10243		-0.7917
	-0.8098	-4.07448		-0.8098	-4.07448		-0.8098	-4.07448		-0.8098	-4.07448				-0.7962	-4.07935		-0.7926	-4.08576		-0.7927	-4.07007		-0.7938	-4.0784				-0.7953	-4.09366		-0.7925	-4.05819		-0.7925	-4.06008		-0.7934	-4.07065				-0.7959	-4.09248		-0.7926	-4.10763		-0.7908
	-0.809	-4.0752		-0.809	-4.0752		-0.809	-4.0752		-0.809	-4.0752				-0.7954	-4.08788		-0.7917	-4.08922		-0.7918	-4.07253		-0.793	-4.08321				-0.7945	-4.09431		-0.7916	-4.06208		-0.7916	-4.06329		-0.7926	-4.07323				-0.795	-4.09469		-0.7917	-4.11278		-0.79
	-0.8081	-4.07588		-0.8081	-4.07588		-0.8081	-4.07588		-0.8081	-4.07588				-0.7946	-4.0948		-0.7909	-4.08624		-0.791	-4.07191		-0.7922	-4.08432				-0.7936	-4.09838		-0.7908	-4.06864		-0.7908	-4.06661		-0.7917	-4.07788				-0.7942	-4.10012		-0.7909	-4.11748		-0.7892
	-0.8073	-4.07645		-0.8073	-4.07645		-0.8073	-4.07645		-0.8073	-4.07645				-0.7937	-4.0974		-0.7901	-4.07774		-0.7902	-4.07191		-0.7913	-4.08235				-0.7928	-4.10358		-0.79	-4.06737		-0.79	-4.07753		-0.7909	-4.08283				-0.7934	-4.10325		-0.7901	-4.12033		-0.7883
	-0.8065	-4.07738		-0.8065	-4.07738		-0.8065	-4.07738		-0.8065	-4.07738				-0.7929	-4.09778		-0.7893	-4.08302		-0.7893	-4.06429		-0.7905	-4.0817				-0.792	-4.10607		-0.7891	-4.06384		-0.7891	-4.0865		-0.7901	-4.08547				-0.7926	-4.10674		-0.7893	-4.11976		-0.7875
	-0.8056	-4.07821		-0.8056	-4.07821		-0.8056	-4.07821		-0.8056	-4.07821				-0.7921	-4.09729		-0.7884	-4.09329		-0.7885	-4.05355		-0.7897	-4.08138				-0.7912	-4.10485		-0.7883	-4.07676		-0.7883	-4.08291		-0.7893	-4.08817				-0.7917	-4.1098		-0.7884	-4.11884		-0.7867
	-0.8048	-4.07904		-0.8048	-4.07904		-0.8048	-4.07904		-0.8048	-4.07904				-0.7912	-4.09865		-0.7876	-4.09745		-0.7877	-4.05611		-0.7888	-4.08407				-0.7903	-4.10874		-0.7875	-4.08778		-0.7875	-4.08276		-0.7884	-4.09309				-0.7909	-4.10813		-0.7876	-4.12344		-0.7859
	-0.804	-4.08035		-0.804	-4.08035		-0.804	-4.08035		-0.804	-4.08035				-0.7904	-4.10133		-0.7868	-4.10519		-0.7869	-4.06737		-0.788	-4.0913				-0.7895	-4.11402		-0.7867	-4.10138		-0.7867	-4.07753		-0.7876	-4.09765				-0.7901	-4.10618		-0.7868	-4.12558		-0.785
	-0.8031	-4.08181		-0.8031	-4.08181		-0.8031	-4.08181		-0.8031	-4.08181				-0.7896	-4.10458		-0.7859	-4.1107		-0.786	-4.06961		-0.7872	-4.09496				-0.7887	-4.11844		-0.7858	-4.1098		-0.7858	-4.07696		-0.7868	-4.10174				-0.7893	-4.10958		-0.7859	-4.12936		-0.7842
	-0.8023	-4.08365		-0.8023	-4.08365		-0.8023	-4.08365		-0.8023	-4.08365				-0.7887	-4.10729		-0.7851	-4.1134		-0.7852	-4.08265		-0.7863	-4.10111				-0.7879	-4.12251		-0.785	-4.11317		-0.785	-4.08413		-0.786	-4.1066				-0.7884	-4.116		-0.7851	-4.13159		-0.7834
	-0.8015	-4.08534		-0.8015	-4.08534		-0.8015	-4.08534		-0.8015	-4.08534				-0.7879	-4.1098		-0.7843	-4.1177		-0.7844	-4.09168		-0.7855	-4.10639				-0.787	-4.1296		-0.7842	-4.10963		-0.7842	-4.09507		-0.7851	-4.11143				-0.7876	-4.12205		-0.7843	-4.13573		-0.7825
	-0.8007	-4.08725		-0.8007	-4.08725		-0.8007	-4.08725		-0.8007	-4.08725				-0.7871	-4.10941		-0.7834	-4.12656		-0.7836	-4.08959		-0.7847	-4.10852				-0.7862	-4.13662		-0.7833	-4.11261		-0.7833	-4.10007		-0.7843	-4.11643				-0.7868	-4.12459		-0.7835	-4.14128		-0.7817
	-0.7998	-4.08927		-0.7998	-4.08927		-0.7998	-4.08927		-0.7998	-4.08927				-0.7863	-4.10331		-0.7826	-4.13194		-0.7827	-4.09291		-0.7839	-4.10939				-0.7854	-4.14333		-0.7825	-4.11953		-0.7825	-4.0974		-0.7835	-4.12009				-0.7859	-4.13047		-0.7826	-4.14691		-0.7809
	-0.799	-4.0913		-0.799	-4.0913		-0.799	-4.0913		-0.799	-4.0913				-0.7854	-4.10062		-0.7818	-4.13265		-0.7819	-4.10265		-0.783	-4.11197				-0.7845	-4.14917		-0.7817	-4.12211		-0.7817	-4.10188		-0.7826	-4.12439				-0.7851	-4.13247		-0.7818	-4.15206		-0.78
	-0.7982	-4.09275		-0.7982	-4.09275		-0.7982	-4.09275		-0.7982	-4.09275				-0.7846	-4.10735		-0.7809	-4.13763		-0.781	-4.11617		-0.7822	-4.12038				-0.7837	-4.15391		-0.7808	-4.12326		-0.7808	-4.11031		-0.7818	-4.12916				-0.7843	-4.13371		-0.781	-4.16065		-0.7792
	-0.7973	-4.09377		-0.7973	-4.09377		-0.7973	-4.09377		-0.7973	-4.09377				-0.7838	-4.1181		-0.7801	-4.13775		-0.7802	-4.12854		-0.7814	-4.12813				-0.7829	-4.15745		-0.78	-4.13018		-0.78	-4.12338		-0.781	-4.137				-0.7835	-4.13626		-0.7801	-4.17063		-0.7784
	-0.7965	-4.09474		-0.7965	-4.09474		-0.7965	-4.09474		-0.7965	-4.09474				-0.7829	-4.12837		-0.7793	-4.1359		-0.7794	-4.12913		-0.7805	-4.13113				-0.7821	-4.15379		-0.7792	-4.131		-0.7792	-4.12849		-0.7802	-4.13776				-0.7826	-4.13519		-0.7793	-4.17947		-0.7775
	-0.7957	-4.0961		-0.7957	-4.0961		-0.7957	-4.0961		-0.7957	-4.0961				-0.7821	-4.1368		-0.7785	-4.1365		-0.7786	-4.13224		-0.7797	-4.13518				-0.7812	-4.14715		-0.7783	-4.14255		-0.7784	-4.12796		-0.7793	-4.13922				-0.7818	-4.142		-0.7785	-4.18742		-0.7767
	-0.7949	-4.09767		-0.7949	-4.09767		-0.7949	-4.09767		-0.7949	-4.09767				-0.7813	-4.14491		-0.7776	-4.14375		-0.7777	-4.11064		-0.7789	-4.1331				-0.7804	-4.14825		-0.7775	-4.14339		-0.7775	-4.12257		-0.7785	-4.13807				-0.7809	-4.15298		-0.7776	-4.19443		-0.7759
	-0.794	-4.09969		-0.794	-4.09969		-0.794	-4.09969		-0.794	-4.09969				-0.7804	-4.14942		-0.7768	-4.14327		-0.7769	-4.1038		-0.778	-4.13216				-0.7796	-4.15565		-0.7767	-4.14406		-0.7767	-4.1279		-0.7777	-4.14254				-0.7801	-4.16247		-0.7768	-4.20045		-0.7751
	-0.7932	-4.10199		-0.7932	-4.10199		-0.7932	-4.10199		-0.7932	-4.10199				-0.7796	-4.14899		-0.776	-4.14466		-0.7761	-4.11799		-0.7772	-4.13721				-0.7787	-4.15852		-0.7759	-4.15237		-0.7759	-4.12936		-0.7768	-4.14675				-0.7793	-4.16992		-0.776	-4.20475		-0.7742
	-0.7924	-4.10425		-0.7924	-4.10425		-0.7924	-4.10425		-0.7924	-4.10425				-0.7788	-4.15144		-0.7751	-4.14856		-0.7752	-4.13159		-0.7764	-4.14386				-0.7779	-4.16002		-0.775	-4.15354		-0.775	-4.13757		-0.776	-4.15038				-0.7785	-4.17503		-0.7752	-4.20635		-0.7734
	-0.7915	-4.10629		-0.7915	-4.10629		-0.7915	-4.10629		-0.7915	-4.10629				-0.778	-4.15733		-0.7743	-4.14795		-0.7744	-4.1359		-0.7756	-4.14706				-0.7771	-4.16412		-0.7742	-4.16172		-0.7742	-4.1414		-0.7752	-4.15575				-0.7776	-4.17927		-0.7743	-4.20516		-0.7726
	-0.7907	-4.10852		-0.7907	-4.10852		-0.7907	-4.10852		-0.7907	-4.10852				-0.7771	-4.16292		-0.7735	-4.15292		-0.7736	-4.1408		-0.7747	-4.15221				-0.7762	-4.1705		-0.7734	-4.16634		-0.7734	-4.14606		-0.7743	-4.16097				-0.7768	-4.18649		-0.7735	-4.20733		-0.7717
	-0.7899	-4.11109		-0.7899	-4.11109		-0.7899	-4.11109		-0.7899	-4.11109				-0.7763	-4.16986		-0.7727	-4.14715		-0.7728	-4.14837		-0.7739	-4.15513				-0.7754	-4.17542		-0.7725	-4.16361		-0.7726	-4.14997		-0.7735	-4.163				-0.776	-4.19518		-0.7727	-4.20621		-0.7709
	-0.789	-4.11396		-0.789	-4.11396		-0.789	-4.11396		-0.789	-4.11396				-0.7755	-4.17659		-0.7718	-4.14303		-0.7719	-4.1577		-0.7731	-4.15911				-0.7746	-4.17646		-0.7717	-4.16698		-0.7717	-4.15627		-0.7727	-4.16657				-0.7751	-4.20169		-0.7718	-4.20544		-0.7701
	-0.7882	-4.11702		-0.7882	-4.11702		-0.7882	-4.11702		-0.7882	-4.11702				-0.7746	-4.18316		-0.771	-4.14905		-0.7711	-4.16679		-0.7722	-4.16633				-0.7738	-4.18191		-0.7709	-4.18475		-0.7709	-4.16058		-0.7719	-4.17575				-0.7743	-4.1997		-0.771	-4.20971		-0.7693
	-0.7874	-4.11959		-0.7874	-4.11959		-0.7874	-4.11959		-0.7874	-4.11959				-0.7738	-4.18522		-0.7702	-4.15752		-0.7703	-4.1716		-0.7714	-4.17144				-0.7729	-4.19037		-0.77	-4.19832		-0.77	-4.17082		-0.771	-4.18651				-0.7735	-4.19037		-0.7702	-4.2156		-0.7684
	-0.7866	-4.12171		-0.7866	-4.12171		-0.7866	-4.12171		-0.7866	-4.12171				-0.773	-4.18529		-0.7693	-4.16564		-0.7694	-4.17302		-0.7706	-4.17465				-0.7721	-4.19777		-0.7692	-4.20803		-0.7692	-4.17947		-0.7702	-4.19509				-0.7727	-4.18442		-0.7693	-4.22337		-0.7676
	-0.7857	-4.12349		-0.7857	-4.12349		-0.7857	-4.12349		-0.7857	-4.12349				-0.7722	-4.18977		-0.7685	-4.17783		-0.7686	-4.17457		-0.7698	-4.18072				-0.7713	-4.19894		-0.7684	-4.21219		-0.7684	-4.17862		-0.7694	-4.19658				-0.7718	-4.19199		-0.7685	-4.23018		-0.7668
	-0.7849	-4.12552		-0.7849	-4.12552		-0.7849	-4.12552		-0.7849	-4.12552				-0.7713	-4.1924		-0.7677	-4.18158		-0.7678	-4.18349		-0.7689	-4.18582				-0.7704	-4.19921		-0.7675	-4.21538		-0.7676	-4.17633		-0.7685	-4.19698				-0.771	-4.19764		-0.7677	-4.2386		-0.7659
	-0.7841	-4.12802		-0.7841	-4.12802		-0.7841	-4.12802		-0.7841	-4.12802				-0.7705	-4.18936		-0.7668	-4.18869		-0.7669	-4.17881		-0.7681	-4.18562				-0.7696	-4.20225		-0.7667	-4.21211		-0.7667	-4.18622		-0.7677	-4.20019				-0.7702	-4.20011		-0.7668	-4.24147		-0.7651
	-0.7833	-4.13083		-0.7833	-4.13083		-0.7833	-4.13083		-0.7833	-4.13083				-0.7697	-4.18816		-0.766	-4.19348		-0.7661	-4.17659		-0.7673	-4.18608				-0.7688	-4.20579		-0.7659	-4.21624		-0.7659	-4.19165		-0.7669	-4.20456				-0.7693	-4.20052		-0.766	-4.2426		-0.7643
	-0.7824	-4.13436		-0.7824	-4.13436		-0.7824	-4.13436		-0.7824	-4.13436				-0.7688	-4.19125		-0.7652	-4.19498		-0.7653	-4.17757		-0.7664	-4.18793				-0.7679	-4.21077		-0.7651	-4.21889		-0.7651	-4.18582		-0.766	-4.20516				-0.7685	-4.20377		-0.7652	-4.24147		-0.7635
	-0.7816	-4.13775		-0.7816	-4.13775		-0.7816	-4.13775		-0.7816	-4.13775				-0.768	-4.19301		-0.7643	-4.19942		-0.7644	-4.1762		-0.7656	-4.18954				-0.7671	-4.21667		-0.7642	-4.22207		-0.7642	-4.18555		-0.7652	-4.2081				-0.7677	-4.21204		-0.7644	-4.24496		-0.7626
	-0.7807	-4.1417		-0.7807	-4.1417		-0.7807	-4.1417		-0.7807	-4.1417				-0.7672	-4.19688		-0.7635	-4.2161		-0.7636	-4.18776		-0.7648	-4.20025				-0.7663	-4.22432		-0.7634	-4.20433		-0.7634	-4.18569		-0.7644	-4.20478				-0.7668	-4.22141		-0.7635	-4.25251		-0.7618
	-0.7799	-4.14618		-0.7799	-4.14618		-0.7799	-4.14618		-0.7799	-4.14618				-0.7663	-4.20287		-0.7627	-4.21638		-0.7628	-4.19613		-0.7639	-4.20513				-0.7654	-4.22643		-0.7626	-4.20993		-0.7626	-4.19274		-0.7635	-4.2097				-0.766	-4.22098		-0.7627	-4.26003		-0.761
	-0.7791	-4.15089		-0.7791	-4.15089		-0.7791	-4.15089		-0.7791	-4.15089				-0.7655	-4.20733		-0.7619	-4.21631		-0.762	-4.19641		-0.7631	-4.20668				-0.7646	-4.22621		-0.7618	-4.22149		-0.7618	-4.19702		-0.7627	-4.21491				-0.7652	-4.21481		-0.7619	-4.26512		-0.7601
	-0.7782	-4.15614		-0.7782	-4.15614		-0.7782	-4.15614		-0.7782	-4.15614				-0.7647	-4.21056		-0.761	-4.22265		-0.7611	-4.20232		-0.7623	-4.21184				-0.7638	-4.2304		-0.7609	-4.23084		-0.7609	-4.20211		-0.7619	-4.22112				-0.7643	-4.22783		-0.761	-4.26753		-0.7593
	-0.7774	-4.16153		-0.7774	-4.16153		-0.7774	-4.16153		-0.7774	-4.16153				-0.7638	-4.21774		-0.7602	-4.22599		-0.7603	-4.21176		-0.7614	-4.2185				-0.763	-4.23635		-0.7601	-4.24033		-0.7601	-4.20586		-0.7611	-4.22751				-0.7635	-4.24397		-0.7602	-4.27221		-0.7585
	-0.7766	-4.16679		-0.7766	-4.16679		-0.7766	-4.16679		-0.7766	-4.16679				-0.763	-4.22439		-0.7594	-4.23441		-0.7595	-4.22199		-0.7606	-4.22693				-0.7621	-4.24094		-0.7593	-4.24926		-0.7593	-4.21127		-0.7602	-4.23382				-0.7627	-4.25806		-0.7594	-4.27442		-0.7576
	-0.7758	-4.1725		-0.7758	-4.1725		-0.7758	-4.1725		-0.7758	-4.1725				-0.7622	-4.22907		-0.7586	-4.23441		-0.7586	-4.23003		-0.7598	-4.23117				-0.7613	-4.24527		-0.7584	-4.25104		-0.7584	-4.2119		-0.7594	-4.23607				-0.7619	-4.26881		-0.7586	-4.28425		-0.7568
	-0.7749	-4.17783		-0.7749	-4.17783		-0.7749	-4.17783		-0.7749	-4.17783				-0.7613	-4.23307		-0.7577	-4.23344		-0.7578	-4.23351		-0.7589	-4.23334				-0.7605	-4.2508		-0.7576	-4.24003		-0.7576	-4.22069		-0.7586	-4.23718				-0.761	-4.27116		-0.7577	-4.29594		-0.756
	-0.7741	-4.18363		-0.7741	-4.18363		-0.7741	-4.18363		-0.7741	-4.18363				-0.7605	-4.23047		-0.7569	-4.24207		-0.757	-4.23092		-0.7581	-4.23449				-0.7596	-4.25555		-0.7568	-4.2398		-0.7568	-4.22827		-0.7577	-4.24121				-0.7602	-4.26146		-0.7569	-4.30216		-0.7551
	-0.7733	-4.18903		-0.7733	-4.18903		-0.7733	-4.18903		-0.7733	-4.18903				-0.7597	-4.23552		-0.7561	-4.24405		-0.7562	-4.229		-0.7573	-4.23619				-0.7588	-4.25352		-0.756	-4.24926		-0.7559	-4.23973		-0.7569	-4.2475				-0.7594	-4.24573		-0.7561	-4.30504		-0.7543
	-0.7725	-4.1947		-0.7725	-4.1947		-0.7725	-4.1947		-0.7725	-4.1947				-0.7589	-4.2488		-0.7552	-4.25586		-0.7553	-4.23448		-0.7565	-4.24638				-0.758	-4.25368		-0.7551	-4.2568		-0.7551	-4.25127		-0.7561	-4.25392				-0.7585	-4.25104		-0.7552	-4.31034		-0.7535
	-0.7716	-4.20025		-0.7716	-4.20025		-0.7716	-4.20025		-0.7716	-4.20025				-0.758	-4.25735		-0.7544	-4.25547		-0.7545	-4.24222		-0.7556	-4.25168				-0.7572	-4.264		-0.7543	-4.26352		-0.7543	-4.2543		-0.7553	-4.26061				-0.7577	-4.2668		-0.7544	-4.31957		-0.7527
	-0.7708	-4.20593		-0.7708	-4.20593		-0.7708	-4.20593		-0.7708	-4.20593				-0.7572	-4.2609		-0.7536	-4.26914		-0.7537	-4.24965		-0.7548	-4.2599				-0.7563	-4.27011		-0.7534	-4.26704		-0.7535	-4.2579		-0.7544	-4.26502				-0.7569	-4.27877		-0.7536	-4.32827		-0.7518
	-0.77	-4.21127		-0.77	-4.21127		-0.77	-4.21127		-0.77	-4.21127				-0.7564	-4.26011		-0.7527	-4.28391		-0.7528	-4.25477		-0.754	-4.26626				-0.7555	-4.27654		-0.7526	-4.27753		-0.7526	-4.26313		-0.7536	-4.2724				-0.7561	-4.2871		-0.7528	-4.33517		-0.751
	-0.7691	-4.21703		-0.7691	-4.21703		-0.7691	-4.21703		-0.7691	-4.21703				-0.7555	-4.26592		-0.7519	-4.29226		-0.752	-4.25775		-0.7531	-4.27198				-0.7547	-4.28308		-0.7518	-4.28845		-0.7518	-4.26265		-0.7528	-4.27806				-0.7552	-4.29328		-0.7519	-4.34342		-0.7502
	-0.7683	-4.22243		-0.7683	-4.22243		-0.7683	-4.22243		-0.7683	-4.22243				-0.7547	-4.27786		-0.7511	-4.29115		-0.7512	-4.26801		-0.7523	-4.27901				-0.7538	-4.29081		-0.751	-4.29886		-0.751	-4.26193		-0.7519	-4.28387				-0.7544	-4.30051		-0.7511	-4.34833		-0.7493
	-0.7675	-4.22812		-0.7675	-4.22812		-0.7675	-4.22812		-0.7675	-4.22812				-0.7539	-4.29234		-0.7503	-4.30478		-0.7503	-4.27679		-0.7515	-4.29131				-0.753	-4.3012		-0.7501	-4.30364		-0.7501	-4.26384		-0.7511	-4.28956				-0.7536	-4.30242		-0.7503	-4.35665		-0.7485
	-0.7666	-4.23374		-0.7666	-4.23374		-0.7666	-4.23374		-0.7666	-4.23374				-0.7531	-4.30583		-0.7494	-4.31238		-0.7495	-4.27918		-0.7507	-4.29913				-0.7522	-4.31096		-0.7493	-4.31069		-0.7493	-4.27572		-0.7503	-4.29912				-0.7527	-4.30086		-0.7494	-4.36482		-0.7477
	-0.7658	-4.23965		-0.7658	-4.23965		-0.7658	-4.23965		-0.7658	-4.23965				-0.7522	-4.31795		-0.7486	-4.32303		-0.7487	-4.28483		-0.7498	-4.3086				-0.7513	-4.31858		-0.7485	-4.32084		-0.7485	-4.28668		-0.7494	-4.3087				-0.7519	-4.30539		-0.7486	-4.37274		-0.7469
	-0.765	-4.24535		-0.765	-4.24535		-0.765	-4.24535		-0.765	-4.24535				-0.7514	-4.3279		-0.7478	-4.33208		-0.7478	-4.29465		-0.749	-4.31821				-0.7505	-4.32459		-0.7476	-4.32021		-0.7477	-4.29585		-0.7486	-4.31355				-0.7511	-4.31229		-0.7478	-4.37966		-0.746
	-0.7642	-4.25111		-0.7642	-4.25111		-0.7642	-4.25111		-0.7642	-4.25111				-0.7506	-4.33564		-0.7469	-4.3379		-0.747	-4.30848		-0.7482	-4.32734				-0.7497	-4.33264		-0.7468	-4.32523		-0.7468	-4.30636		-0.7478	-4.32141				-0.7502	-4.3174		-0.7469	-4.38732		-0.7452
	-0.7633	-4.25759		-0.7633	-4.25759		-0.7633	-4.25759		-0.7633	-4.25759				-0.7497	-4.34189		-0.7461	-4.34496		-0.7462	-4.31948		-0.7473	-4.33544				-0.7488	-4.34525		-0.746	-4.32827		-0.746	-4.31007		-0.7469	-4.32786				-0.7494	-4.3279		-0.7461	-4.39968		-0.7444
	-0.7625	-4.26496		-0.7625	-4.26496		-0.7625	-4.26496		-0.7625	-4.26496				-0.7489	-4.34525		-0.7453	-4.34448		-0.7454	-4.32679		-0.7465	-4.33884				-0.748	-4.35105		-0.7452	-4.32836		-0.7452	-4.31185		-0.7461	-4.33042				-0.7486	-4.34285		-0.7453	-4.41601		-0.7435
	-0.7617	-4.27246		-0.7617	-4.27246		-0.7617	-4.27246		-0.7617	-4.27246				-0.7481	-4.34247		-0.7444	-4.33781		-0.7445	-4.33479		-0.7457	-4.33836				-0.7472	-4.35982		-0.7443	-4.34486		-0.7443	-4.31319		-0.7453	-4.33929				-0.7477	-4.35105		-0.7445	-4.4262		-0.7427
	-0.7608	-4.28059		-0.7608	-4.28059		-0.7608	-4.28059		-0.7608	-4.28059				-0.7473	-4.34371		-0.7436	-4.34419		-0.7437	-4.32929		-0.7449	-4.33906				-0.7464	-4.37397		-0.7435	-4.35086		-0.7435	-4.31444		-0.7445	-4.34642				-0.7469	-4.35823		-0.7436	-4.43747		-0.7419
	-0.76	-4.2871		-0.76	-4.2871		-0.76	-4.2871		-0.76	-4.2871				-0.7464	-4.35428		-0.7428	-4.35853		-0.7429	-4.32753		-0.744	-4.34678				-0.7455	-4.385		-0.7426	-4.35379		-0.7426	-4.32303		-0.7436	-4.35394				-0.7461	-4.36683		-0.7428	-4.44904		-0.741
	-0.7592	-4.29576		-0.7592	-4.29576		-0.7592	-4.29576		-0.7592	-4.29576				-0.7456	-4.36764		-0.7419	-4.37914		-0.742	-4.33857		-0.7432	-4.36178				-0.7447	-4.38479		-0.7418	-4.35615		-0.7418	-4.33932		-0.7428	-4.36009				-0.7453	-4.38237		-0.742	-4.46042		-0.7402
	-0.7583	-4.30364		-0.7583	-4.30364		-0.7583	-4.30364		-0.7583	-4.30364				-0.7448	-4.38289		-0.7411	-4.40285		-0.7412	-4.3496		-0.7424	-4.37845				-0.7439	-4.38785		-0.741	-4.37222		-0.741	-4.35301		-0.742	-4.37103				-0.7444	-4.39308		-0.7411	-4.47198		-0.7394
	-0.7575	-4.31274		-0.7575	-4.31274		-0.7575	-4.31274		-0.7575	-4.31274				-0.7439	-4.39805		-0.7403	-4.41128		-0.7404	-4.36432		-0.7415	-4.39121				-0.743	-4.39567		-0.7402	-4.38743		-0.7402	-4.35872		-0.7411	-4.38061				-0.7436	-4.40274		-0.7403	-4.4786		-0.7385
	-0.7567	-4.32221		-0.7567	-4.32221		-0.7567	-4.32221		-0.7567	-4.32221				-0.7431	-4.41072		-0.7394	-4.41061		-0.7395	-4.36764		-0.7407	-4.39632				-0.7422	-4.4133		-0.7393	-4.38331		-0.7393	-4.36542		-0.7403	-4.38735				-0.7428	-4.40705		-0.7395	-4.49282		-0.7377
	-0.7559	-4.33152		-0.7559	-4.33152		-0.7559	-4.33152		-0.7559	-4.33152				-0.7423	-4.42136		-0.7386	-4.43156		-0.7387	-4.37572		-0.7399	-4.40955				-0.7414	-4.42216		-0.7385	-4.38743		-0.7385	-4.38227		-0.7395	-4.39729				-0.7419	-4.41106		-0.7386	-4.51103		-0.7369
	-0.755	-4.34151		-0.755	-4.34151		-0.755	-4.34151		-0.755	-4.34151				-0.7414	-4.43368		-0.7378	-4.44491		-0.7379	-4.38955		-0.739	-4.42271				-0.7406	-4.43914		-0.7377	-4.40517		-0.7377	-4.39426		-0.7387	-4.41286				-0.7411	-4.42643		-0.7378	-4.52783		-0.7361
	-0.7542	-4.35125		-0.7542	-4.35125		-0.7542	-4.35125		-0.7542	-4.35125				-0.7406	-4.44358		-0.737	-4.46294		-0.7371	-4.40572		-0.7382	-4.43741				-0.7397	-4.45742		-0.7369	-4.42585		-0.7369	-4.41251		-0.7378	-4.43193				-0.7403	-4.44045		-0.737	-4.54683		-0.7352
	-0.7534	-4.36051		-0.7534	-4.36051		-0.7534	-4.36051		-0.7534	-4.36051				-0.7398	-4.4521		-0.7361	-4.46967		-0.7362	-4.42458		-0.7374	-4.44879				-0.7389	-4.47612		-0.736	-4.44249		-0.736	-4.42678		-0.737	-4.44847				-0.7394	-4.45643		-0.7362	-4.56848		-0.7344
	-0.7525	-4.37008		-0.7525	-4.37008		-0.7525	-4.37008		-0.7525	-4.37008				-0.7389	-4.46294		-0.7353	-4.49039		-0.7354	-4.44575		-0.7365	-4.46636				-0.7381	-4.50766		-0.7352	-4.46218		-0.7352	-4.44069		-0.7362	-4.47018				-0.7386	-4.46954		-0.7353	-4.59244		-0.7336
	-0.7517	-4.37893		-0.7517	-4.37893		-0.7517	-4.37893		-0.7517	-4.37893				-0.7381	-4.47431		-0.7345	-4.50501		-0.7346	-4.4675		-0.7357	-4.48227				-0.7372	-4.53655		-0.7344	-4.46954		-0.7344	-4.45124		-0.7353	-4.48578				-0.7378	-4.47782		-0.7345	-4.61816		-0.7327
	-0.7509	-4.38945		-0.7509	-4.38945		-0.7509	-4.38945		-0.7509	-4.38945				-0.7373	-4.48718		-0.7337	-4.51089		-0.7337	-4.48772		-0.7349	-4.49526				-0.7364	-4.55689		-0.7335	-4.46916		-0.7336	-4.45693		-0.7345	-4.49433				-0.737	-4.50224		-0.7337	-4.63808		-0.7319
	-0.75	-4.40143		-0.75	-4.40143		-0.75	-4.40143		-0.75	-4.40143				-0.7365	-4.50612		-0.7328	-4.521		-0.7329	-4.50224		-0.7341	-4.50979				-0.7356	-4.57447		-0.7327	-4.47599		-0.7327	-4.46445		-0.7337	-4.50497				-0.7361	-4.53224		-0.7328	-4.65267		-0.7311
	-0.7492	-4.4133		-0.7492	-4.4133		-0.7492	-4.4133		-0.7492	-4.4133				-0.7356	-4.52172		-0.732	-4.5318		-0.7321	-4.51032		-0.7332	-4.52128				-0.7347	-4.58905		-0.7319	-4.48162		-0.7319	-4.48333		-0.7328	-4.518				-0.7353	-4.56019		-0.732	-4.66959		-0.7302
	-0.7484	-4.42666		-0.7484	-4.42666		-0.7484	-4.42666		-0.7484	-4.42666				-0.7348	-4.5388		-0.7312	-4.54898		-0.7313	-4.51414		-0.7324	-4.53397				-0.7339	-4.60537		-0.7311	-4.48825		-0.7311	-4.50141		-0.732	-4.53168				-0.7345	-4.57692		-0.7312	-4.69529		-0.7294
	-0.7475	-4.4395		-0.7475	-4.4395		-0.7475	-4.4395		-0.7475	-4.4395				-0.734	-4.55191		-0.7303	-4.56639		-0.7304	-4.53091		-0.7316	-4.54974				-0.7331	-4.63171		-0.7302	-4.50349		-0.7302	-4.51656		-0.7312	-4.55058				-0.7337	-4.58137		-0.7303	-4.71851		-0.7286
	-0.7467	-4.45407		-0.7467	-4.45407		-0.7467	-4.45407		-0.7467	-4.45407				-0.7331	-4.57725		-0.7295	-4.57922		-0.7296	-4.55533		-0.7307	-4.5706				-0.7323	-4.65679		-0.7294	-4.52974		-0.7294	-4.5367		-0.7304	-4.57441				-0.7328	-4.61066		-0.7295	-4.74088		-0.7278
	-0.7459	-4.47057		-0.7459	-4.47057		-0.7459	-4.47057		-0.7459	-4.47057				-0.7323	-4.59619		-0.7287	-4.6031		-0.7288	-4.58603		-0.7299	-4.59511				-0.7314	-4.67203		-0.7286	-4.55471		-0.7286	-4.56098		-0.7295	-4.59591				-0.732	-4.62142		-0.7287	-4.77109		-0.7269
	-0.7451	-4.48758		-0.7451	-4.48758		-0.7451	-4.48758		-0.7451	-4.48758				-0.7315	-4.61961		-0.7278	-4.62251		-0.7279	-4.61529		-0.7291	-4.61914				-0.7306	-4.69315		-0.7277	-4.56976		-0.7277	-4.58403		-0.7287	-4.61565				-0.7312	-4.66716		-0.7278	-4.80576		-0.7261
	-0.7442	-4.50668		-0.7442	-4.50668		-0.7442	-4.50668		-0.7442	-4.50668				-0.7307	-4.64666		-0.727	-4.66334		-0.7271	-4.63771		-0.7283	-4.64924				-0.7298	-4.72584		-0.7269	-4.58855		-0.7269	-4.6059		-0.7279	-4.6401				-0.7303	-4.71806		-0.727	-4.85574		-0.7253
	-0.7434	-4.52812		-0.7434	-4.52812		-0.7434	-4.52812		-0.7434	-4.52812				-0.7298	-4.6706		-0.7262	-4.6968		-0.7263	-4.65699		-0.7274	-4.6748				-0.7289	-4.77469		-0.7261	-4.6005		-0.7261	-4.63752		-0.727	-4.6709				-0.7295	-4.7587		-0.7262	-4.91793		-0.7244
	-0.7426	-4.54944		-0.7426	-4.54944		-0.7426	-4.54944		-0.7426	-4.54944				-0.729	-4.68256		-0.7253	-4.72423		-0.7254	-4.6702		-0.7266	-4.69233				-0.7281	-4.83744		-0.7252	-4.6269		-0.7252	-4.66878		-0.7262	-4.71104				-0.7287	-4.78383		-0.7254	-4.99097		-0.7236
	-0.7417	-4.57365		-0.7417	-4.57365		-0.7417	-4.57365		-0.7417	-4.57365				-0.7282	-4.70797		-0.7245	-4.75178		-0.7246	-4.67965		-0.7258	-4.71313				-0.7273	-4.92665		-0.7244	-4.65718		-0.7244	-4.67695		-0.7254	-4.7536				-0.7278	-4.8471		-0.7245	-5.04789		-0.7228
	-0.7409	-4.59929		-0.7409	-4.59929		-0.7409	-4.59929		-0.7409	-4.59929				-0.7273	-4.7597		-0.7237	-4.76726		-0.7238	-4.6811		-0.7249	-4.73602				-0.7264	-5.01153		-0.7236	-4.6702		-0.7236	-4.69144		-0.7245	-4.79105				-0.727	-4.91364		-0.7237	-5.10364		-0.7219
	-0.7401	-4.6269		-0.7401	-4.6269		-0.7401	-4.6269		-0.7401	-4.6269				-0.7265	-4.81192		-0.7229	-4.80355		-0.7229	-4.70797		-0.7241	-4.77448				-0.7256	-5.06324		-0.7227	-4.70224		-0.7228	-4.73025		-0.7237	-4.83191				-0.7262	-4.9813		-0.7229	-5.1747		-0.7211
	-0.7393	-4.65916		-0.7393	-4.65916		-0.7393	-4.65916		-0.7393	-4.65916				-0.7257	-4.85047		-0.722	-4.85605		-0.7221	-4.74763		-0.7233	-4.81805				-0.7248	-5.12563		-0.7219	-4.74232		-0.7219	-4.76271		-0.7229	-4.87689				-0.7253	-5.089		-0.722	-5.27189		-0.7203
	-0.7384	-4.69315		-0.7384	-4.69315		-0.7384	-4.69315		-0.7384	-4.69315				-0.7248	-4.93742		-0.7212	-4.89997		-0.7213	-4.79642		-0.7224	-4.87794				-0.724	-5.25547		-0.7211	-4.79615		-0.7211	-4.7997		-0.7221	-4.95044				-0.7245	-5.25932		-0.7212	-5.45161		-0.7195
	-0.7376	-4.73283		-0.7376	-4.73283		-0.7376	-4.73283		-0.7376	-4.73283				-0.724	-5.04129		-0.7204	-4.96457		-0.7205	-4.84558		-0.7216	-4.95048				-0.7231	-5.51131		-0.7203	-4.85792		-0.7203	-4.8471		-0.7212	-5.07211				-0.7237	-5.49867		-0.7204	-5.694		-0.7186
	-0.7368	-4.77521		-0.7368	-4.77521		-0.7368	-4.77521		-0.7368	-4.77521				-0.7232	-5.1197		-0.7195	-5.05611		-0.7197	-4.8884		-0.7208	-5.0214				-0.7223	-6.42864		-0.7194	-4.91973		-0.7194	-4.88273		-0.7204	-5.41037				-0.7229	-5.71422		-0.7196	-6.33498		-0.7178
	-0.7359	-4.82333		-0.7359	-4.82333		-0.7359	-4.82333		-0.7359	-4.82333				-0.7224	-5.29192		-0.7187	-5.14783		-0.7188	-4.93181		-0.72	-5.12385				-0.7215	-5.7778		-0.7186	-4.97347		-0.7186	-4.92849		-0.7196	-5.22659				-0.722	-5.78489		-0.7187	-5.80715		-0.717
	-0.7351	-4.87976		-0.7351	-4.87976		-0.7351	-4.87976		-0.7351	-4.87976				-0.7215	-5.55253		-0.7179	-5.24041		-0.718	-4.95429		-0.7191	-5.24908				-0.7206	-5.40176		-0.7178	-5.04964		-0.7178	-4.98297		-0.7187	-5.14479				-0.7212	-6.62215		-0.7179	-5.66015		-0.7161
	-0.7343	-4.9393		-0.7343	-4.9393		-0.7343	-4.9393		-0.7343	-4.9393				-0.7207	-6.32496		-0.717	-5.34979		-0.7171	-5.02104		-0.7183	-5.56526				-0.7198	-5.17535		-0.7169	-5.11379		-0.7169	-5.06048		-0.7179	-5.11654				-0.7204	-5.66015		-0.717	-5.26122		-0.7153
	-0.7334	-5.01233		-0.7334	-5.01233		-0.7334	-5.01233		-0.7334	-5.01233				-0.7199	-5.67264		-0.7162	-5.56591		-0.7163	-5.08906		-0.7175	-5.44254				-0.719	-5.03264		-0.7161	-5.23822		-0.7161	-5.15883		-0.7171	-5.14323				-0.7196	-5.3535		-0.7162	-5.12552		-0.7145
	-0.7326	-5.10018		-0.7326	-5.10018		-0.7326	-5.10018		-0.7326	-5.10018				-0.719	-5.31444		-0.7154	-6.0752		-0.7155	-5.18237		-0.7166	-5.524				-0.7181	-4.93367		-0.7153	-5.37572		-0.7153	-5.26785		-0.7162	-5.19241				-0.7187	-5.14363		-0.7154	-5.01719		-0.7136
	-0.7318	-5.20986		-0.7318	-5.20986		-0.7318	-5.20986		-0.7318	-5.20986				-0.7182	-5.12022		-0.7146	-5.96377		-0.7146	-5.29964		-0.7158	-5.46121				-0.7173	-4.84863		-0.7144	-5.56928		-0.7144	-5.40905		-0.7154	-5.27565				-0.7179	-4.99439		-0.7146	-4.93629		-0.7128
	-0.731	-5.35803		-0.731	-5.35803		-0.731	-5.35803		-0.731	-5.35803				-0.7174	-4.99055		-0.7137	-5.66015		-0.7138	-5.54791		-0.715	-5.39954				-0.7165	-4.81844		-0.7136	-5.73636		-0.7136	-5.63227		-0.7146	-5.39569				-0.717	-4.8824		-0.7137	-4.87746		-0.712
	-0.7301	-5.58004		-0.7301	-5.58004		-0.7301	-5.58004		-0.7301	-5.58004				-0.7165	-4.89997		-0.7129	-5.40793		-0.713	-6.12779		-0.7141	-5.47856				-0.7156	-4.80493		-0.7128	-6.26536		-0.7128	-6.08703		-0.7137	-5.71911				-0.7162	-4.79183		-0.7129	-4.81474		-0.7112
	-0.7293	-6.09216		-0.7293	-6.09216		-0.7293	-6.09216		-0.7293	-6.09216				-0.7157	-4.82565		-0.7121	-5.24033		-0.7122	-6.27984		-0.7133	-5.44861				-0.7148	-4.72492		-0.712	-5.95861		-0.712	-6.32624		-0.7129	-5.66992				-0.7154	-4.73471		-0.7121	-4.77109		-0.7103
	-0.7285	-5.97964		-0.7285	-5.97964		-0.7285	-5.97964		-0.7285	-5.97964				-0.7149	-4.77417		-0.7112	-5.11902		-0.7113	-5.66015		-0.7125	-5.18445				-0.714	-4.64975		-0.7111	-5.66015		-0.7111	-5.73802		-0.7121	-5.34931				-0.7145	-4.69616		-0.7113	-4.72423		-0.7095
	-0.7276	-5.66015		-0.7276	-5.66015		-0.7276	-5.66015		-0.7276	-5.66015				-0.714	-4.75671		-0.7104	-5.04383		-0.7105	-5.35783		-0.7116	-5.05279				-0.7132	-4.60801		-0.7103	-5.35724		-0.7103	-5.46878		-0.7113	-5.14467				-0.7137	-4.65936		-0.7104	-4.67121		-0.7087
	-0.7268	-5.32166		-0.7268	-5.32166		-0.7268	-5.32166		-0.7268	-5.32166				-0.7132	-4.78225		-0.7096	-4.95624		-0.7097	-5.19192		-0.7108	-4.97681				-0.7123	-4.58453		-0.7095	-5.22243		-0.7095	-5.25555		-0.7104	-5.02083				-0.7129	-4.65404		-0.7096	-4.6216		-0.7078
	-0.726	-5.18131		-0.726	-5.18131		-0.726	-5.18131		-0.726	-5.18131				-0.7124	-4.76802		-0.7087	-4.86455		-0.7088	-5.09669		-0.71	-4.90975				-0.7115	-4.54975		-0.7086	-5.12529		-0.7086	-5.15342		-0.7096	-4.94282				-0.7121	-4.60119		-0.7088	-4.57971		-0.707
	-0.7252	-5.07433		-0.7252	-5.07433		-0.7252	-5.07433		-0.7252	-5.07433				-0.7116	-4.69854		-0.7079	-4.81333		-0.708	-5.01399		-0.7092	-4.84195				-0.7107	-4.49949		-0.7078	-5.06464		-0.7078	-5.05419		-0.7088	-4.87277				-0.7112	-4.5394		-0.7079	-4.54303		-0.7062
	-0.7243	-4.9859		-0.7243	-4.9859		-0.7243	-4.9859		-0.7243	-4.9859				-0.7107	-4.63526		-0.7071	-4.77885		-0.7072	-4.94577		-0.7083	-4.78663				-0.7098	-4.46067		-0.707	-5.00436		-0.707	-4.97388		-0.7079	-4.81297				-0.7104	-4.49134		-0.7071	-4.50668		-0.7054
	-0.7235	-4.91328		-0.7235	-4.91328		-0.7235	-4.91328		-0.7235	-4.91328				-0.7099	-4.57873		-0.7063	-4.74256		-0.7064	-4.89211		-0.7075	-4.7378				-0.709	-4.42022		-0.7061	-4.94348		-0.7062	-4.92154		-0.7071	-4.76175				-0.7096	-4.47534		-0.7063	-4.47185		-0.7045
	-0.7227	-4.84986		-0.7227	-4.84986		-0.7227	-4.84986		-0.7227	-4.84986				-0.7091	-4.52988		-0.7054	-4.69897		-0.7055	-4.85511		-0.7067	-4.69466				-0.7082	-4.37862		-0.7053	-4.87713		-0.7053	-4.86075		-0.7063	-4.7055				-0.7088	-4.4443		-0.7055	-4.44057		-0.7037
	-0.7218	-4.79398		-0.7218	-4.79398		-0.7218	-4.79398		-0.7218	-4.79398				-0.7082	-4.49107		-0.7046	-4.6558		-0.7047	-4.80465		-0.7058	-4.65051				-0.7073	-4.344		-0.7045	-4.82623		-0.7045	-4.79588		-0.7054	-4.65537				-0.7079	-4.41005		-0.7046	-4.4124		-0.7028
	-0.721	-4.74232		-0.721	-4.74232		-0.721	-4.74232		-0.721	-4.74232				-0.7074	-4.45469		-0.7038	-4.62342		-0.7039	-4.74836		-0.705	-4.60883				-0.7065	-4.31668		-0.7036	-4.77754		-0.7036	-4.74112		-0.7046	-4.61178				-0.7071	-4.37438		-0.7038	-4.38563		-0.702
	-0.7202	-4.69422		-0.7202	-4.69422		-0.7202	-4.69422		-0.7202	-4.69422				-0.7066	-4.42666		-0.7029	-4.59705		-0.703	-4.69919		-0.7042	-4.5743				-0.7057	-4.29422		-0.7028	-4.72308		-0.7028	-4.69854		-0.7038	-4.57195				-0.7063	-4.34228		-0.7029	-4.36012		-0.7012
	-0.7193	-4.6515		-0.7193	-4.6515		-0.7193	-4.6515		-0.7193	-4.6515				-0.7058	-4.40727		-0.7021	-4.56719		-0.7022	-4.66294		-0.7034	-4.5458				-0.7049	-4.27753		-0.702	-4.68006		-0.702	-4.66234		-0.703	-4.53998				-0.7054	-4.31229		-0.7021	-4.33847		-0.7004
	-0.7185	-4.6119		-0.7185	-4.6119		-0.7185	-4.6119		-0.7185	-4.6119				-0.7049	-4.39545		-0.7013	-4.53596		-0.7014	-4.62709		-0.7025	-4.5195				-0.704	-4.2636		-0.7012	-4.64207		-0.7012	-4.6319		-0.7021	-4.51252				-0.7046	-4.28693		-0.7013	-4.3213		-0.6995
	-0.7177	-4.57365		-0.7177	-4.57365		-0.7177	-4.57365		-0.7177	-4.57365				-0.7041	-4.37955		-0.7004	-4.50654		-0.7005	-4.59108		-0.7017	-4.49239				-0.7032	-4.24215		-0.7003	-4.60801		-0.7003	-4.59774		-0.7013	-4.48263				-0.7038	-4.26608		-0.7005	-4.30268		-0.6987
	-0.7168	-4.53865		-0.7168	-4.53865		-0.7168	-4.53865		-0.7168	-4.53865				-0.7032	-4.35291		-0.6996	-4.48017		-0.6997	-4.56703		-0.7008	-4.4667				-0.7024	-4.21574		-0.6995	-4.57545		-0.6995	-4.56751		-0.7005	-4.4529				-0.7029	-4.24634		-0.6996	-4.28542		-0.6979
	-0.716	-4.50501		-0.716	-4.50501		-0.716	-4.50501		-0.716	-4.50501				-0.7024	-4.32698		-0.6988	-4.45482		-0.6989	-4.53447		-0.7	-4.43875				-0.7015	-4.19368		-0.6987	-4.55207		-0.6987	-4.53655		-0.6996	-4.42744				-0.7021	-4.22885		-0.6988	-4.26632		-0.697
	-0.7152	-4.47444		-0.7152	-4.47444		-0.7152	-4.47444		-0.7152	-4.47444				-0.7016	-4.30557		-0.6979	-4.44093		-0.698	-4.50446		-0.6992	-4.41699				-0.7007	-4.17179		-0.6979	-4.53284		-0.6978	-4.50376		-0.6988	-4.4028				-0.7013	-4.20796		-0.698	-4.24542		-0.6962
	-0.7144	-4.44515		-0.7144	-4.44515		-0.7144	-4.44515		-0.7144	-4.44515				-0.7008	-4.28794		-0.6971	-4.42262		-0.6972	-4.48162		-0.6984	-4.39739				-0.6999	-4.15163		-0.697	-4.50169		-0.697	-4.47599		-0.698	-4.37644				-0.7004	-4.1897		-0.6971	-4.22636		-0.6954
	-0.7135	-4.41646		-0.7135	-4.41646		-0.7135	-4.41646		-0.7135	-4.41646				-0.6999	-4.27165		-0.6963	-4.40351		-0.6964	-4.46005		-0.6975	-4.3784				-0.6991	-4.13638		-0.6962	-4.47496		-0.6962	-4.45173		-0.6972	-4.35436				-0.6996	-4.17179		-0.6963	-4.20824		-0.6946
	-0.7127	-4.38987		-0.7127	-4.38987		-0.7127	-4.38987		-0.7127	-4.38987				-0.6991	-4.25469		-0.6955	-4.38258		-0.6956	-4.43403		-0.6967	-4.3571				-0.6982	-4.12714		-0.6954	-4.45063		-0.6954	-4.42969		-0.6963	-4.33582				-0.6988	-4.14954		-0.6955	-4.19335		-0.6937
	-0.7119	-4.36411		-0.7119	-4.36411		-0.7119	-4.36411		-0.7119	-4.36411				-0.6983	-4.2307		-0.6946	-4.36121		-0.6947	-4.41016		-0.6959	-4.33402				-0.6974	-4.11165		-0.6945	-4.42852		-0.6945	-4.40682		-0.6955	-4.31567				-0.698	-4.12954		-0.6947	-4.17954		-0.6929
	-0.711	-4.33857		-0.711	-4.33857		-0.711	-4.33857		-0.711	-4.33857				-0.6975	-4.20782		-0.6938	-4.34046		-0.6939	-4.38785		-0.6951	-4.31204				-0.6966	-4.09178		-0.6937	-4.40627		-0.6937	-4.38321		-0.6947	-4.29375				-0.6971	-4.11205		-0.6938	-4.16361		-0.6921
	-0.7102	-4.31354		-0.7102	-4.31354		-0.7102	-4.31354		-0.7102	-4.31354				-0.6966	-4.18729		-0.693	-4.32003		-0.6931	-4.36886		-0.6942	-4.29206				-0.6957	-4.07304		-0.6929	-4.38658		-0.6929	-4.36241		-0.6938	-4.27401				-0.6963	-4.09642		-0.693	-4.14813		-0.6912
	-0.7094	-4.28861		-0.7094	-4.28861		-0.7094	-4.28861		-0.7094	-4.28861				-0.6958	-4.1696		-0.6922	-4.30207		-0.6922	-4.34989		-0.6934	-4.27385				-0.6949	-4.05562		-0.692	-4.36937		-0.692	-4.344		-0.693	-4.25633				-0.6955	-4.07665		-0.6922	-4.13395		-0.6904
	-0.7085	-4.26456		-0.7085	-4.26456		-0.7085	-4.26456		-0.7085	-4.26456				-0.695	-4.15428		-0.6913	-4.28651		-0.6914	-4.33743		-0.6926	-4.25941				-0.6941	-4.03905		-0.6912	-4.35164		-0.6912	-4.32689		-0.6922	-4.23919				-0.6946	-4.06043		-0.6913	-4.11936		-0.6896
	-0.7077	-4.24056		-0.7077	-4.24056		-0.7077	-4.24056		-0.7077	-4.24056				-0.6941	-4.139		-0.6905	-4.27409		-0.6906	-4.3213		-0.6917	-4.2448				-0.6932	-4.02438		-0.6904	-4.33705		-0.6904	-4.30998		-0.6913	-4.22381				-0.6938	-4.04658		-0.6905	-4.10702		-0.6887
	-0.7069	-4.21796		-0.7069	-4.21796		-0.7069	-4.21796		-0.7069	-4.21796				-0.6933	-4.12651		-0.6896	-4.26011		-0.6897	-4.30077		-0.6909	-4.22913				-0.6924	-4.011		-0.6895	-4.32349		-0.6895	-4.29585		-0.6905	-4.21011				-0.693	-4.03438		-0.6897	-4.09334		-0.6879
	-0.7061	-4.19532		-0.7061	-4.19532		-0.7061	-4.19532		-0.7061	-4.19532				-0.6925	-4.11685		-0.6888	-4.24634		-0.6889	-4.282		-0.6901	-4.21506				-0.6916	-3.99783		-0.6887	-4.30786		-0.6887	-4.27852		-0.6897	-4.19474				-0.6921	-4.02821		-0.6888	-4.08103		-0.6871
	-0.7052	-4.17289		-0.7052	-4.17289		-0.7052	-4.17289		-0.7052	-4.17289				-0.6916	-4.10375		-0.688	-4.23129		-0.6881	-4.26336		-0.6892	-4.19947				-0.6907	-3.9859		-0.6879	-4.29132		-0.6879	-4.26059		-0.6888	-4.17927				-0.6913	-4.02086		-0.688	-4.06824		-0.6863
	-0.7044	-4.15132		-0.7044	-4.15132		-0.7044	-4.15132		-0.7044	-4.15132				-0.6908	-4.08842		-0.6872	-4.2171		-0.6873	-4.24787		-0.6884	-4.18446				-0.6899	-3.97675		-0.687	-4.27589		-0.6871	-4.2423		-0.688	-4.16498				-0.6905	-4.00244		-0.6872	-4.05655		-0.6854
	-0.7036	-4.12995		-0.7036	-4.12995		-0.7036	-4.12995		-0.7036	-4.12995				-0.69	-4.07371		-0.6863	-4.20482		-0.6864	-4.23463		-0.6876	-4.17105				-0.6891	-3.96778		-0.6862	-4.25908		-0.6862	-4.22724		-0.6872	-4.15137				-0.6896	-3.98632		-0.6864	-4.04639		-0.6846
	-0.7027	-4.10902		-0.7027	-4.10902		-0.7027	-4.10902		-0.7027	-4.10902				-0.6892	-4.05968		-0.6855	-4.19172		-0.6856	-4.22026		-0.6868	-4.15722				-0.6882	-3.96059		-0.6854	-4.24649		-0.6854	-4.21517		-0.6863	-4.14075				-0.6888	-3.97551		-0.6855	-4.03527		-0.6838
	-0.7019	-4.08874		-0.7019	-4.08874		-0.7019	-4.08874		-0.7019	-4.08874				-0.6883	-4.0445		-0.6847	-4.17986		-0.6848	-4.20817		-0.6859	-4.14418				-0.6874	-3.95039		-0.6846	-4.235		-0.6846	-4.20246		-0.6855	-4.12928				-0.688	-3.96658		-0.6847	-4.02425		-0.6829
	-0.7011	-4.06803		-0.7011	-4.06803		-0.7011	-4.06803		-0.7011	-4.06803				-0.6875	-4.03077		-0.6838	-4.16858		-0.6839	-4.19743		-0.6851	-4.13226				-0.6866	-3.93554		-0.6837	-4.22084		-0.6837	-4.18883		-0.6847	-4.11507				-0.6872	-3.9535		-0.6839	-4.01426		-0.6821
	-0.7002	-4.04857		-0.7002	-4.04857		-0.7002	-4.04857		-0.7002	-4.04857				-0.6867	-4.01891		-0.683	-4.15652		-0.6831	-4.18469		-0.6843	-4.12004				-0.6858	-3.92445		-0.6829	-4.20719		-0.6829	-4.1749		-0.6839	-4.10218				-0.6863	-3.93779		-0.683	-4.0045		-0.6813
	-0.6994	-4.02896		-0.6994	-4.02896		-0.6994	-4.02896		-0.6994	-4.02896				-0.6858	-4.01095		-0.6822	-4.14539		-0.6823	-4.17237		-0.6834	-4.10957				-0.6849	-3.914		-0.6821	-4.19777		-0.6821	-4.16134		-0.683	-4.09104				-0.6855	-3.92738		-0.6822	-3.99525		-0.6805
	-0.6986	-4.00944		-0.6986	-4.00944		-0.6986	-4.00944		-0.6986	-4.00944				-0.685	-4.00187		-0.6814	-4.1343		-0.6815	-4.16052		-0.6826	-4.0989				-0.6841	-3.9017		-0.6812	-4.18529		-0.6813	-4.14899		-0.6822	-4.07866				-0.6847	-3.92118		-0.6814	-3.98548		-0.6796
	-0.6978	-3.99012		-0.6978	-3.99012		-0.6978	-3.99012		-0.6978	-3.99012				-0.6842	-3.99055		-0.6805	-4.1239		-0.6806	-4.1507		-0.6818	-4.08838				-0.6833	-3.89042		-0.6804	-4.17237		-0.6804	-4.13823		-0.6814	-4.06701				-0.6839	-3.90763		-0.6805	-3.97593		-0.6788
	-0.6969	-3.97062		-0.6969	-3.97062		-0.6969	-3.97062		-0.6969	-3.97062				-0.6833	-3.9784		-0.6797	-4.1143		-0.6798	-4.139		-0.6809	-4.07723				-0.6825	-3.87844		-0.6796	-4.15958		-0.6796	-4.12866		-0.6806	-4.05556				-0.683	-3.89211		-0.6797	-3.96738		-0.678
	-0.6961	-3.95156		-0.6961	-3.95156		-0.6961	-3.95156		-0.6961	-3.95156				-0.6825	-3.96617		-0.6789	-4.1038		-0.679	-4.12755		-0.6801	-4.06584				-0.6816	-3.86646		-0.6788	-4.14703		-0.6788	-4.11964		-0.6797	-4.04438				-0.6822	-3.87976		-0.6789	-3.96019		-0.6771
	-0.6953	-3.93293		-0.6953	-3.93293		-0.6953	-3.93293		-0.6953	-3.93293				-0.6817	-3.95742		-0.678	-4.09404		-0.6781	-4.11856		-0.6793	-4.05668				-0.6808	-3.85605		-0.6779	-4.13507		-0.6779	-4.10891		-0.6789	-4.03334				-0.6814	-3.86967		-0.678	-3.95273		-0.6763
	-0.6944	-3.91435		-0.6944	-3.91435		-0.6944	-3.91435		-0.6944	-3.91435				-0.6809	-3.95078		-0.6772	-4.08391		-0.6773	-4.1098		-0.6785	-4.04817				-0.68	-3.84802		-0.6771	-4.12459		-0.6771	-4.09756		-0.6781	-4.02339				-0.6805	-3.85792		-0.6772	-3.94539		-0.6755
	-0.6936	-3.8962		-0.6936	-3.8962		-0.6936	-3.8962		-0.6936	-3.8962				-0.68	-3.9431		-0.6764	-4.07443		-0.6765	-4.10166		-0.6776	-4.03973				-0.6792	-3.83953		-0.6763	-4.11487		-0.6763	-4.08767		-0.6773	-4.01402				-0.6797	-3.84497		-0.6764	-3.93817		-0.6746
	-0.6928	-3.87811		-0.6928	-3.87811		-0.6928	-3.87811		-0.6928	-3.87811				-0.6792	-3.93367		-0.6755	-4.06742		-0.6756	-4.09162		-0.6768	-4.03091				-0.6783	-3.8315		-0.6754	-4.10635		-0.6754	-4.07904		-0.6764	-4.00563				-0.6789	-3.83416		-0.6756	-3.93107		-0.6738
	-0.6919	-3.85981		-0.6919	-3.85981		-0.6919	-3.85981		-0.6919	-3.85981				-0.6784	-3.923		-0.6747	-4.06003		-0.6748	-4.08276		-0.676	-4.02193				-0.6775	-3.82362		-0.6746	-4.09751		-0.6746	-4.06976		-0.6756	-3.99696				-0.678	-3.82652		-0.6747	-3.92445		-0.673
	-0.6911	-3.84224		-0.6911	-3.84224		-0.6911	-3.84224		-0.6911	-3.84224				-0.6775	-3.91364		-0.6739	-4.05237		-0.674	-4.07557		-0.6751	-4.01386				-0.6766	-3.81559		-0.6738	-4.08794		-0.6738	-4.06008		-0.6747	-3.98787				-0.6772	-3.82016		-0.6739	-3.91829		-0.6722
	-0.6903	-3.8242		-0.6903	-3.8242		-0.6903	-3.8242		-0.6903	-3.8242				-0.6767	-3.90413		-0.6731	-4.04441		-0.6732	-4.06844		-0.6743	-4.00566				-0.6758	-3.80743		-0.673	-4.08003		-0.673	-4.05315		-0.6739	-3.98021				-0.6764	-3.81304		-0.6731	-3.91186		-0.6713
	-0.6894	-3.80632		-0.6894	-3.80632		-0.6894	-3.80632		-0.6894	-3.80632				-0.6759	-3.89381		-0.6722	-4.03687		-0.6723	-4.06258		-0.6735	-3.99776				-0.675	-3.79778		-0.6721	-4.07145		-0.6721	-4.04619		-0.6731	-3.97181				-0.6756	-3.80521		-0.6722	-3.90588		-0.6705
	-0.6886	-3.78941		-0.6886	-3.78941		-0.6886	-3.78941		-0.6886	-3.78941				-0.675	-3.88207		-0.6714	-4.02984		-0.6715	-4.05616		-0.6726	-3.98935				-0.6742	-3.78888		-0.6713	-4.06434		-0.6713	-4.03934		-0.6723	-3.96419				-0.6747	-3.79507		-0.6714	-3.89963		-0.6697
	-0.6878	-3.77211		-0.6878	-3.77211		-0.6878	-3.77211		-0.6878	-3.77211				-0.6742	-3.87128		-0.6706	-4.02264		-0.6707	-4.04998		-0.6718	-3.9813				-0.6733	-3.77989		-0.6705	-4.05789		-0.6705	-4.03217		-0.6714	-3.95665				-0.6739	-3.78489		-0.6706	-3.89415		-0.6688
	-0.687	-3.75473		-0.687	-3.75473		-0.687	-3.75473		-0.687	-3.75473				-0.6734	-3.8617		-0.6697	-4.01624		-0.6698	-4.04369		-0.671	-3.97387				-0.6725	-3.77134		-0.6696	-4.05007		-0.6696	-4.02747		-0.6706	-3.94963				-0.6731	-3.77624		-0.6698	-3.88807		-0.668
	-0.6861	-3.73755		-0.6861	-3.73755		-0.6861	-3.73755		-0.6861	-3.73755				-0.6726	-3.85387		-0.6689	-4.00962		-0.669	-4.03777		-0.6702	-3.96709				-0.6717	-3.76271		-0.6688	-4.04369		-0.6688	-4.02305		-0.6698	-3.94315				-0.6722	-3.76726		-0.6689	-3.88372		-0.6672
	-0.6853	-3.71988		-0.6853	-3.71988		-0.6853	-3.71988		-0.6853	-3.71988				-0.6717	-3.84955		-0.6681	-4.00323		-0.6682	-4.03236		-0.6693	-3.96171				-0.6708	-3.75252		-0.668	-4.03668		-0.668	-4.019		-0.6689	-3.93607				-0.6714	-3.75696		-0.6681	-3.87877		-0.6663
	-0.6845	-3.70312		-0.6845	-3.70312		-0.6845	-3.70312		-0.6845	-3.70312				-0.6709	-3.84073		-0.6673	-3.99697		-0.6674	-4.02821		-0.6685	-3.95531				-0.67	-3.74328		-0.6671	-4.02891		-0.6671	-4.01265		-0.6681	-3.92828				-0.6706	-3.74715		-0.6673	-3.87484		-0.6655
	-0.6836	-3.68592		-0.6836	-3.68592		-0.6836	-3.68592		-0.6836	-3.68592				-0.6701	-3.8315		-0.6664	-3.9914		-0.6665	-4.02452		-0.6677	-3.94914				-0.6692	-3.73447		-0.6663	-4.02145		-0.6663	-4.00723		-0.6673	-3.92105				-0.6697	-3.74041		-0.6664	-3.87095		-0.6647
	-0.6828	-3.66878		-0.6828	-3.66878		-0.6828	-3.66878		-0.6828	-3.66878				-0.6692	-3.82478		-0.6656	-3.9859		-0.6657	-4.02072		-0.6668	-3.9438				-0.6683	-3.72654		-0.6655	-4.01471		-0.6655	-4.00192		-0.6664	-3.91439				-0.6689	-3.73353		-0.6656	-3.86678		-0.6638
	-0.682	-3.6517		-0.682	-3.6517		-0.682	-3.6517		-0.682	-3.6517				-0.6684	-3.81787		-0.6648	-3.98005		-0.6648	-4.0171		-0.666	-3.93834				-0.6675	-3.71829		-0.6646	-4.00855		-0.6646	-3.9974		-0.6656	-3.90808				-0.6681	-3.72216		-0.6648	-3.86265		-0.663
	-0.6812	-3.63451		-0.6812	-3.63451		-0.6812	-3.63451		-0.6812	-3.63451				-0.6676	-3.80939		-0.6639	-3.97469		-0.664	-4.01323		-0.6652	-3.93244				-0.6667	-3.70952		-0.6638	-4.00213		-0.6638	-3.99353		-0.6648	-3.90173				-0.6673	-3.71287		-0.6639	-3.85824		-0.6622
	-0.6803	-3.61762		-0.6803	-3.61762		-0.6803	-3.61762		-0.6803	-3.61762				-0.6667	-3.79942		-0.6631	-3.969		-0.6632	-4.00815		-0.6643	-3.92552				-0.6658	-3.70202		-0.663	-3.99568		-0.663	-3.98928		-0.6639	-3.89566				-0.6664	-3.70443		-0.6631	-3.85511		-0.6614
	-0.6795	-3.60067		-0.6795	-3.60067		-0.6795	-3.60067		-0.6795	-3.60067				-0.6659	-3.79048		-0.6623	-3.96377		-0.6624	-4.00283		-0.6635	-3.91903				-0.665	-3.69272		-0.6621	-3.98928		-0.6622	-3.9838		-0.6631	-3.8886				-0.6656	-3.69357		-0.6623	-3.85263		-0.6605
	-0.6787	-3.58386		-0.6787	-3.58386		-0.6787	-3.58386		-0.6787	-3.58386				-0.6651	-3.78331		-0.6614	-3.959		-0.6615	-3.9974		-0.6627	-3.91324				-0.6642	-3.68319		-0.6613	-3.98213		-0.6613	-3.97881		-0.6623	-3.88138				-0.6648	-3.68445		-0.6615	-3.85017		-0.6597
	-0.6778	-3.56735		-0.6778	-3.56735		-0.6778	-3.56735		-0.6778	-3.56735				-0.6642	-3.77806		-0.6606	-3.95311		-0.6607	-3.99183		-0.6618	-3.90767				-0.6634	-3.67469		-0.6605	-3.9751		-0.6605	-3.97428		-0.6615	-3.87469				-0.6639	-3.67675		-0.6606	-3.84741		-0.6589
	-0.677	-3.55068		-0.677	-3.55068		-0.677	-3.55068		-0.677	-3.55068				-0.6634	-3.76981		-0.6598	-3.94808		-0.6599	-3.9859		-0.661	-3.90126				-0.6625	-3.66635		-0.6597	-3.96738		-0.6597	-3.9694		-0.6606	-3.86771				-0.6631	-3.66776		-0.6598	-3.84436		-0.658
	-0.6762	-3.53462		-0.6762	-3.53462		-0.6762	-3.53462		-0.6762	-3.53462				-0.6626	-3.76045		-0.6589	-3.94271		-0.659	-3.98047		-0.6602	-3.89454				-0.6617	-3.65817		-0.6588	-3.95979		-0.6588	-3.96337		-0.6598	-3.86044				-0.6623	-3.65797		-0.659	-3.84164		-0.6572
	-0.6753	-3.51856		-0.6753	-3.51856		-0.6753	-3.51856		-0.6753	-3.51856				-0.6618	-3.7508		-0.6581	-3.93667		-0.6582	-3.97306		-0.6594	-3.88684				-0.6609	-3.65014		-0.658	-3.95156		-0.658	-3.95742		-0.659	-3.85304				-0.6614	-3.64724		-0.6581	-3.83863		-0.6564
	-0.6745	-3.50252		-0.6745	-3.50252		-0.6745	-3.50252		-0.6745	-3.50252				-0.6609	-3.74136		-0.6573	-3.92996		-0.6574	-3.96497		-0.6585	-3.87877				-0.66	-3.64073		-0.6572	-3.94348		-0.6572	-3.95001		-0.6581	-3.84474				-0.6606	-3.63658		-0.6573	-3.83565		-0.6555
	-0.6737	-3.48705		-0.6737	-3.48705		-0.6737	-3.48705		-0.6737	-3.48705				-0.6601	-3.73259		-0.6565	-3.92336		-0.6566	-3.95546		-0.6577	-3.87047				-0.6592	-3.63078		-0.6564	-3.93405		-0.6564	-3.94157		-0.6573	-3.83547				-0.6598	-3.62635		-0.6565	-3.83298		-0.6547
	-0.6729	-3.47134		-0.6729	-3.47134		-0.6729	-3.47134		-0.6729	-3.47134				-0.6593	-3.72331		-0.6556	-3.91614		-0.6557	-3.94539		-0.6569	-3.86161				-0.6584	-3.6216		-0.6555	-3.92445		-0.6555	-3.93219		-0.6565	-3.82608				-0.6589	-3.61601		-0.6557	-3.83003		-0.6539
	-0.672	-3.45581		-0.672	-3.45581		-0.672	-3.45581		-0.672	-3.45581				-0.6584	-3.71579		-0.6548	-3.90904		-0.6549	-3.93479		-0.656	-3.85321				-0.6576	-3.61314		-0.6547	-3.914		-0.6547	-3.92227		-0.6557	-3.81647				-0.6581	-3.60783		-0.6548	-3.82681		-0.6531
	-0.6712	-3.44033		-0.6712	-3.44033		-0.6712	-3.44033		-0.6712	-3.44033				-0.6576	-3.70885		-0.654	-3.89997		-0.6541	-3.92372		-0.6552	-3.84418				-0.6567	-3.60537		-0.6539	-3.90344		-0.6539	-3.91186		-0.6548	-3.80689				-0.6573	-3.59705		-0.654	-3.82362		-0.6522
	-0.6704	-3.4247		-0.6704	-3.4247		-0.6704	-3.4247		-0.6704	-3.4247				-0.6568	-3.70202		-0.6531	-3.89076		-0.6532	-3.91293		-0.6544	-3.83524				-0.6559	-3.59739		-0.653	-3.89245		-0.653	-3.90066		-0.654	-3.79684				-0.6565	-3.58637		-0.6531	-3.81987		-0.6514
	-0.6695	-3.40949		-0.6695	-3.40949		-0.6695	-3.40949		-0.6695	-3.40949				-0.656	-3.69486		-0.6523	-3.88074		-0.6524	-3.9017		-0.6536	-3.82577				-0.6551	-3.58939		-0.6522	-3.88008		-0.6522	-3.88874		-0.6532	-3.78607				-0.6556	-3.57757		-0.6523	-3.81616		-0.6506
	-0.6687	-3.39426		-0.6687	-3.39426		-0.6687	-3.39426		-0.6687	-3.39426				-0.6551	-3.68761		-0.6515	-3.87031		-0.6516	-3.88941		-0.6527	-3.81578				-0.6543	-3.57938		-0.6514	-3.86838		-0.6514	-3.87713		-0.6524	-3.77496				-0.6548	-3.56928		-0.6515	-3.81135		-0.6497
	-0.6679	-3.37945		-0.6679	-3.37945		-0.6679	-3.37945		-0.6679	-3.37945				-0.6543	-3.67985		-0.6506	-3.85918		-0.6507	-3.87713		-0.6519	-3.80539				-0.6534	-3.5696		-0.6505	-3.85574		-0.6505	-3.86487		-0.6515	-3.7634				-0.654	-3.55878		-0.6507	-3.80604		-0.6489
	-0.667	-3.36492		-0.667	-3.36492		-0.667	-3.36492		-0.667	-3.36492				-0.6535	-3.67121		-0.6498	-3.84771		-0.6499	-3.86423		-0.6511	-3.79439				-0.6526	-3.56067		-0.6497	-3.84254		-0.6497	-3.85263		-0.6507	-3.75195				-0.6531	-3.54929		-0.6498	-3.79997		-0.6481
	-0.6662	-3.35067		-0.6662	-3.35067		-0.6662	-3.35067		-0.6662	-3.35067				-0.6526	-3.66334		-0.649	-3.83565		-0.6491	-3.8514		-0.6502	-3.78346				-0.6517	-3.55129		-0.6489	-3.82974		-0.6489	-3.83983		-0.6498	-3.74029				-0.6523	-3.54		-0.649	-3.79344		-0.6473
	-0.6654	-3.33668		-0.6654	-3.33668		-0.6654	-3.33668		-0.6654	-3.33668				-0.6518	-3.6558		-0.6482	-3.82362		-0.6483	-3.83863		-0.6494	-3.77269				-0.6509	-3.54242		-0.6481	-3.81531		-0.6481	-3.82623		-0.649	-3.72799				-0.6515	-3.53018		-0.6482	-3.78622		-0.6464
	-0.6645	-3.32276		-0.6645	-3.32276		-0.6645	-3.32276		-0.6645	-3.32276				-0.651	-3.64724		-0.6473	-3.81107		-0.6474	-3.82565		-0.6486	-3.76132				-0.6501	-3.53417		-0.6472	-3.80189		-0.6472	-3.81333		-0.6482	-3.71646				-0.6506	-3.51999		-0.6474	-3.77859		-0.6456
	-0.6637	-3.3091		-0.6637	-3.3091		-0.6637	-3.3091		-0.6637	-3.3091				-0.6501	-3.63865		-0.6465	-3.79806		-0.6466	-3.81163		-0.6477	-3.74945				-0.6492	-3.52476		-0.6464	-3.78861		-0.6464	-3.80052		-0.6473	-3.70463				-0.6498	-3.5099		-0.6465	-3.76955		-0.6448
	-0.6629	-3.29576		-0.6629	-3.29576		-0.6629	-3.29576		-0.6629	-3.29576				-0.6493	-3.63041		-0.6457	-3.78489		-0.6458	-3.79751		-0.6469	-3.73761				-0.6484	-3.51599		-0.6456	-3.77469		-0.6456	-3.78781		-0.6465	-3.69283				-0.649	-3.50004		-0.6457	-3.7607		-0.6439
	-0.6621	-3.28225		-0.6621	-3.28225		-0.6621	-3.28225		-0.6621	-3.28225				-0.6485	-3.62069		-0.6449	-3.7716		-0.6449	-3.78436		-0.6461	-3.72555				-0.6476	-3.50808		-0.6447	-3.7612		-0.6447	-3.77521		-0.6457	-3.6815				-0.6482	-3.49093		-0.6449	-3.7508		-0.6431
	-0.6612	-3.26922		-0.6612	-3.26922		-0.6612	-3.26922		-0.6612	-3.26922				-0.6477	-3.61013		-0.644	-3.75845		-0.6441	-3.77186		-0.6453	-3.71348				-0.6468	-3.49716		-0.6439	-3.74788		-0.6439	-3.76221		-0.6449	-3.66908				-0.6473	-3.48214		-0.644	-3.73969		-0.6423
	-0.6604	-3.25618		-0.6604	-3.25618		-0.6604	-3.25618		-0.6604	-3.25618				-0.6468	-3.59963		-0.6432	-3.74521		-0.6433	-3.7592		-0.6444	-3.70135				-0.6459	-3.48758		-0.6431	-3.73424		-0.6431	-3.74958		-0.644	-3.65713				-0.6465	-3.4734		-0.6432	-3.72932		-0.6414
	-0.6596	-3.24298		-0.6596	-3.24298		-0.6596	-3.24298		-0.6596	-3.24298				-0.646	-3.58821		-0.6424	-3.73142		-0.6425	-3.74642		-0.6436	-3.68868				-0.6451	-3.47873		-0.6423	-3.72102		-0.6423	-3.7366		-0.6432	-3.64545				-0.6457	-3.46471		-0.6424	-3.71829		-0.6406
	-0.6587	-3.23003		-0.6587	-3.23003		-0.6587	-3.23003		-0.6587	-3.23003				-0.6452	-3.57675		-0.6415	-3.71806		-0.6416	-3.73306		-0.6428	-3.67596				-0.6443	-3.46954		-0.6414	-3.70797		-0.6414	-3.72423		-0.6424	-3.63391				-0.6448	-3.45469		-0.6415	-3.70708		-0.6398
	-0.6579	-3.21724		-0.6579	-3.21724		-0.6579	-3.21724		-0.6579	-3.21724				-0.6443	-3.56511		-0.6407	-3.70487		-0.6408	-3.72033		-0.6419	-3.66344				-0.6434	-3.45942		-0.6406	-3.69508		-0.6406	-3.71242		-0.6415	-3.62231				-0.644	-3.44491		-0.6407	-3.69572		-0.6389
	-0.6571	-3.20475		-0.6571	-3.20475		-0.6571	-3.20475		-0.6571	-3.20475				-0.6435	-3.55362		-0.6398	-3.69186		-0.6399	-3.70863		-0.6411	-3.65137				-0.6426	-3.44989		-0.6397	-3.68235		-0.6397	-3.70027		-0.6407	-3.61084				-0.6432	-3.43557		-0.6399	-3.68424		-0.6381
	-0.6563	-3.1924		-0.6563	-3.1924		-0.6563	-3.1924		-0.6563	-3.1924				-0.6427	-3.54166		-0.639	-3.67923		-0.6391	-3.69659		-0.6403	-3.63916				-0.6418	-3.44033		-0.6389	-3.66938		-0.6389	-3.68803		-0.6399	-3.59925				-0.6424	-3.42562		-0.639	-3.67244		-0.6373
	-0.6554	-3.18026		-0.6554	-3.18026		-0.6554	-3.18026		-0.6554	-3.18026				-0.6418	-3.53033		-0.6382	-3.66635		-0.6383	-3.68466		-0.6394	-3.62711				-0.641	-3.42992		-0.6381	-3.65679		-0.6381	-3.67613		-0.6391	-3.58761				-0.6415	-3.41567		-0.6382	-3.66075		-0.6365
	-0.6546	-3.16858		-0.6546	-3.16858		-0.6546	-3.16858		-0.6546	-3.16858				-0.641	-3.51971		-0.6374	-3.65365		-0.6375	-3.67285		-0.6386	-3.6154				-0.6401	-3.41999		-0.6372	-3.64455		-0.6373	-3.66454		-0.6382	-3.57636				-0.6407	-3.40528		-0.6374	-3.64917		-0.6356
	-0.6538	-3.15702		-0.6538	-3.15702		-0.6538	-3.15702		-0.6538	-3.15702				-0.6402	-3.50948		-0.6365	-3.64149		-0.6366	-3.66134		-0.6378	-3.60411				-0.6393	-3.41039		-0.6364	-3.63227		-0.6364	-3.65326		-0.6374	-3.5653				-0.6398	-3.39426		-0.6365	-3.63752		-0.6348
	-0.6529	-3.14582		-0.6529	-3.14582		-0.6529	-3.14582		-0.6529	-3.14582				-0.6393	-3.49963		-0.6357	-3.62893		-0.6358	-3.64975		-0.6369	-3.59277				-0.6385	-3.40066		-0.6356	-3.62033		-0.6356	-3.64187		-0.6366	-3.55429				-0.639	-3.38384		-0.6357	-3.6258		-0.634
	-0.6521	-3.1346		-0.6521	-3.1346		-0.6521	-3.1346		-0.6521	-3.1346				-0.6385	-3.48905		-0.6349	-3.61672		-0.635	-3.63827		-0.6361	-3.58135				-0.6376	-3.3903		-0.6348	-3.60836		-0.6348	-3.6306		-0.6357	-3.54309				-0.6382	-3.37376		-0.6349	-3.61404		-0.6331
	-0.6513	-3.12349		-0.6513	-3.12349		-0.6513	-3.12349		-0.6513	-3.12349				-0.6377	-3.47782		-0.634	-3.6045		-0.6341	-3.62672		-0.6353	-3.56968				-0.6368	-3.38018		-0.6339	-3.59671		-0.6339	-3.61979		-0.6349	-3.53222				-0.6374	-3.36361		-0.6341	-3.60258		-0.6323
	-0.6504	-3.11266		-0.6504	-3.11266		-0.6504	-3.11266		-0.6504	-3.11266				-0.6369	-3.46674		-0.6332	-3.59244		-0.6333	-3.61565		-0.6345	-3.55827				-0.636	-3.36957		-0.6331	-3.58486		-0.6331	-3.60854		-0.6341	-3.52099				-0.6365	-3.3532		-0.6332	-3.59108		-0.6315
	-0.6496	-3.10199		-0.6496	-3.10199		-0.6496	-3.10199		-0.6496	-3.10199				-0.636	-3.45606		-0.6324	-3.58071		-0.6325	-3.6045		-0.6336	-3.54709				-0.6351	-3.35853		-0.6323	-3.57349		-0.6323	-3.59791		-0.6332	-3.50998				-0.6357	-3.34323		-0.6324	-3.57971		-0.6307
	-0.6488	-3.09135		-0.6488	-3.09135		-0.6488	-3.09135		-0.6488	-3.09135				-0.6352	-3.44539		-0.6316	-3.56928		-0.6317	-3.59397		-0.6328	-3.53621				-0.6343	-3.34717		-0.6315	-3.56225		-0.6315	-3.5872		-0.6324	-3.49888				-0.6349	-3.33339		-0.6316	-3.56831		-0.6298
	-0.648	-3.08113		-0.648	-3.08113		-0.648	-3.08113		-0.648	-3.08113				-0.6344	-3.43415		-0.6307	-3.55783		-0.6308	-3.58319		-0.632	-3.52506				-0.6335	-3.33658		-0.6306	-3.55098		-0.6306	-3.57659		-0.6316	-3.48805				-0.634	-3.32248		-0.6308	-3.55721		-0.629
	-0.6471	-3.07094		-0.6471	-3.07094		-0.6471	-3.07094		-0.6471	-3.07094				-0.6335	-3.42343		-0.6299	-3.54668		-0.63	-3.57268		-0.6311	-3.51426				-0.6327	-3.32652		-0.6298	-3.54		-0.6298	-3.56639		-0.6308	-3.47764				-0.6332	-3.31185		-0.6299	-3.54592		-0.6282
	-0.6463	-3.06098		-0.6463	-3.06098		-0.6463	-3.06098		-0.6463	-3.06098				-0.6327	-3.41319		-0.6291	-3.53551		-0.6292	-3.56241		-0.6303	-3.5037				-0.6318	-3.31641		-0.629	-3.529		-0.629	-3.55611		-0.6299	-3.46718				-0.6324	-3.30146		-0.6291	-3.53477		-0.6273
	-0.6455	-3.051		-0.6455	-3.051		-0.6455	-3.051		-0.6455	-3.051				-0.6319	-3.40307		-0.6282	-3.52447		-0.6284	-3.55207		-0.6295	-3.4932				-0.631	-3.30619		-0.6281	-3.51813		-0.6281	-3.54592		-0.6291	-3.45674				-0.6316	-3.29115		-0.6283	-3.52389		-0.6265
	-0.6446	-3.04091		-0.6446	-3.04091		-0.6446	-3.04091		-0.6446	-3.04091				-0.6311	-3.39276		-0.6274	-3.51357		-0.6275	-3.54197		-0.6287	-3.48277				-0.6302	-3.29516		-0.6273	-3.50752		-0.6273	-3.53581		-0.6283	-3.44616				-0.6307	-3.2805		-0.6274	-3.513		-0.6257
	-0.6438	-3.03114		-0.6438	-3.03114		-0.6438	-3.03114		-0.6438	-3.03114				-0.6302	-3.38258		-0.6266	-3.50266		-0.6267	-3.5318		-0.6278	-3.47235				-0.6293	-3.28441		-0.6265	-3.49703		-0.6265	-3.52578		-0.6274	-3.43574				-0.6299	-3.27019		-0.6266	-3.50224		-0.6248
	-0.643	-3.02136		-0.643	-3.02136		-0.643	-3.02136		-0.643	-3.02136				-0.6294	-3.37335		-0.6257	-3.49228		-0.6258	-3.52172		-0.627	-3.46245				-0.6285	-3.27409		-0.6256	-3.48665		-0.6256	-3.51627		-0.6266	-3.42567				-0.6291	-3.2598		-0.6258	-3.49174		-0.624
	-0.6422	-3.01189		-0.6422	-3.01189		-0.6422	-3.01189		-0.6422	-3.01189				-0.6286	-3.36583		-0.6249	-3.48149		-0.625	-3.51201		-0.6262	-3.45311				-0.6277	-3.26344		-0.6248	-3.47638		-0.6248	-3.50668		-0.6258	-3.4155				-0.6283	-3.24972		-0.6249	-3.48122		-0.6232
	-0.6413	-3.00244		-0.6413	-3.00244		-0.6413	-3.00244		-0.6413	-3.00244				-0.6277	-3.35635		-0.6241	-3.47108		-0.6242	-3.5021		-0.6253	-3.44318				-0.6268	-3.25259		-0.624	-3.46597		-0.624	-3.49703		-0.6249	-3.4052				-0.6274	-3.23928		-0.6241	-3.47095		-0.6223
	-0.6405	-2.99311		-0.6405	-2.99311		-0.6405	-2.99311		-0.6405	-2.99311				-0.6269	-3.34621		-0.6233	-3.4608		-0.6233	-3.49241		-0.6245	-3.43314				-0.626	-3.242		-0.6231	-3.45606		-0.6231	-3.48758		-0.6241	-3.39521				-0.6266	-3.22915		-0.6233	-3.46067		-0.6215
	-0.6396	-2.98422		-0.6396	-2.98422		-0.6396	-2.98422		-0.6396	-2.98422				-0.6261	-3.3363		-0.6224	-3.45075		-0.6225	-3.48294		-0.6237	-3.42333				-0.6252	-3.23203		-0.6223	-3.446		-0.6223	-3.47821		-0.6233	-3.38541				-0.6257	-3.21911		-0.6224	-3.45038		-0.6207
	-0.6388	-2.97551		-0.6388	-2.97551		-0.6388	-2.97551		-0.6388	-2.97551				-0.6252	-3.32652		-0.6216	-3.44045		-0.6217	-3.47353		-0.6228	-3.4135				-0.6244	-3.22214		-0.6215	-3.43616		-0.6215	-3.46903		-0.6225	-3.37578				-0.6249	-3.20901		-0.6216	-3.44045		-0.6199
	-0.638	-2.96698		-0.638	-2.96698		-0.638	-2.96698		-0.638	-2.96698				-0.6244	-3.31668		-0.6208	-3.43051		-0.6209	-3.46445		-0.622	-3.40388				-0.6235	-3.2124		-0.6207	-3.42655		-0.6207	-3.46005		-0.6216	-3.36633				-0.6241	-3.19956		-0.6208	-3.43016		-0.619
	-0.6372	-2.95821		-0.6372	-2.95821		-0.6372	-2.95821		-0.6372	-2.95821				-0.6236	-3.30715		-0.6199	-3.42067		-0.62	-3.45544		-0.6212	-3.39442				-0.6227	-3.20266		-0.6198	-3.41703		-0.6198	-3.45087		-0.6208	-3.35686				-0.6232	-3.18963		-0.6199	-3.42033		-0.6182
	-0.6363	-2.95001		-0.6363	-2.95001		-0.6363	-2.95001		-0.6363	-2.95001				-0.6227	-3.29748		-0.6191	-3.41094		-0.6192	-3.44612		-0.6203	-3.38485				-0.6219	-3.19321		-0.619	-3.40749		-0.619	-3.44213		-0.62	-3.34761				-0.6224	-3.18019		-0.6191	-3.41072		-0.6174
	-0.6355	-2.94195		-0.6355	-2.94195		-0.6355	-2.94195		-0.6355	-2.94195				-0.6219	-3.28828		-0.6183	-3.40121		-0.6184	-3.43711		-0.6195	-3.37553				-0.621	-3.18369		-0.6182	-3.39837		-0.6182	-3.43333		-0.6191	-3.33846				-0.6216	-3.17057		-0.6183	-3.40088		-0.6165
	-0.6347	-2.93367		-0.6347	-2.93367		-0.6347	-2.93367		-0.6347	-2.93367				-0.6211	-3.27885		-0.6175	-3.39179		-0.6175	-3.42806		-0.6187	-3.36623				-0.6202	-3.17477		-0.6173	-3.38913		-0.6173	-3.42447		-0.6183	-3.32945				-0.6208	-3.16121		-0.6175	-3.39137		-0.6157
	-0.6338	-2.92518		-0.6338	-2.92518		-0.6338	-2.92518		-0.6338	-2.92518				-0.6203	-3.26938		-0.6166	-3.38227		-0.6167	-3.41942		-0.6179	-3.35702				-0.6194	-3.16571		-0.6165	-3.38007		-0.6165	-3.4159		-0.6175	-3.32056				-0.6199	-3.152		-0.6166	-3.38153		-0.6149
	-0.633	-2.91721		-0.633	-2.91721		-0.633	-2.91721		-0.633	-2.91721				-0.6194	-3.26003		-0.6158	-3.37284		-0.6159	-3.41072		-0.617	-3.34786				-0.6186	-3.15683		-0.6157	-3.3709		-0.6157	-3.40727		-0.6167	-3.31166				-0.6191	-3.14309		-0.6158	-3.37212		-0.614
	-0.6322	-2.90939		-0.6322	-2.90939		-0.6322	-2.90939		-0.6322	-2.90939				-0.6186	-3.2508		-0.6149	-3.36371		-0.615	-3.40209		-0.6162	-3.33887				-0.6177	-3.1485		-0.6148	-3.36181		-0.6148	-3.3987		-0.6158	-3.303				-0.6183	-3.13407		-0.615	-3.36281		-0.6132
	-0.6314	-2.9017		-0.6314	-2.9017		-0.6314	-2.9017		-0.6314	-2.9017				-0.6178	-3.24207		-0.6141	-3.35418		-0.6142	-3.39362		-0.6154	-3.32996				-0.6169	-3.1396		-0.614	-3.35291		-0.614	-3.3903		-0.615	-3.29427				-0.6175	-3.125		-0.6141	-3.3535		-0.6124
	-0.6305	-2.89415		-0.6305	-2.89415		-0.6305	-2.89415		-0.6305	-2.89415				-0.6169	-3.23329		-0.6133	-3.34525		-0.6134	-3.38521		-0.6145	-3.32125				-0.616	-3.13083		-0.6132	-3.344		-0.6132	-3.38174		-0.6141	-3.28552				-0.6166	-3.11605		-0.6133	-3.34448		-0.6115
	-0.6297	-2.88673		-0.6297	-2.88673		-0.6297	-2.88673		-0.6297	-2.88673				-0.6161	-3.22454		-0.6125	-3.3363		-0.6126	-3.37654		-0.6137	-3.31246				-0.6152	-3.12182		-0.6123	-3.33517		-0.6124	-3.37366		-0.6133	-3.27688				-0.6158	-3.10724		-0.6125	-3.3347		-0.6107
	-0.6289	-2.87943		-0.6289	-2.87943		-0.6289	-2.87943		-0.6289	-2.87943				-0.6153	-3.21602		-0.6116	-3.32753		-0.6117	-3.36825		-0.6129	-3.30394				-0.6144	-3.11317		-0.6115	-3.32633		-0.6115	-3.36552		-0.6125	-3.26834				-0.615	-3.09865		-0.6116	-3.32578		-0.6099
	-0.628	-2.87192		-0.628	-2.87192		-0.628	-2.87192		-0.628	-2.87192				-0.6144	-3.20754		-0.6108	-3.31867		-0.6109	-3.35982		-0.612	-3.29534				-0.6136	-3.10447		-0.6107	-3.31785		-0.6107	-3.35724		-0.6117	-3.25985				-0.6141	-3.09002		-0.6108	-3.31686		-0.6091
	-0.6272	-2.86487		-0.6272	-2.86487		-0.6272	-2.86487		-0.6272	-2.86487				-0.6136	-3.19949		-0.61	-3.31016		-0.6101	-3.35174		-0.6112	-3.28713				-0.6127	-3.09561		-0.6099	-3.30972		-0.6099	-3.34901		-0.6108	-3.25145				-0.6133	-3.08139		-0.61	-3.30795		-0.6082
	-0.6264	-2.85792		-0.6264	-2.85792		-0.6264	-2.85792		-0.6264	-2.85792				-0.6128	-3.19159		-0.6091	-3.30146		-0.6092	-3.34361		-0.6104	-3.27889				-0.6119	-3.08714		-0.609	-3.3012		-0.609	-3.34104		-0.61	-3.24313				-0.6124	-3.07273		-0.6092	-3.29921		-0.6074
	-0.6255	-2.85078		-0.6255	-2.85078		-0.6255	-2.85078		-0.6255	-2.85078				-0.6119	-3.1831		-0.6083	-3.29294		-0.6084	-3.33545		-0.6095	-3.2705				-0.6111	-3.07863		-0.6082	-3.29311		-0.6082	-3.3332		-0.6092	-3.23498				-0.6116	-3.06439		-0.6083	-3.29056		-0.6066
	-0.6247	-2.84406		-0.6247	-2.84406		-0.6247	-2.84406		-0.6247	-2.84406				-0.6111	-3.17444		-0.6075	-3.28433		-0.6076	-3.32753		-0.6087	-3.2621				-0.6102	-3.07007		-0.6074	-3.28483		-0.6074	-3.32486		-0.6083	-3.22659				-0.6108	-3.05646		-0.6075	-3.282		-0.6057
	-0.6239	-2.83714		-0.6239	-2.83714		-0.6239	-2.83714		-0.6239	-2.83714				-0.6103	-3.16577		-0.6066	-3.27589		-0.6067	-3.31948		-0.6079	-3.25371				-0.6094	-3.06188		-0.6065	-3.27679		-0.6065	-3.31659		-0.6075	-3.21842				-0.61	-3.04837		-0.6067	-3.27344		-0.6049
	-0.6231	-2.83062		-0.6231	-2.83062		-0.6231	-2.83062		-0.6231	-2.83062				-0.6095	-3.15727		-0.6058	-3.26761		-0.6059	-3.31158		-0.6071	-3.24548				-0.6086	-3.0537		-0.6057	-3.26865		-0.6057	-3.30901		-0.6067	-3.21045				-0.6091	-3.0401		-0.6058	-3.2648		-0.6041
	-0.6222	-2.82391		-0.6222	-2.82391		-0.6222	-2.82391		-0.6222	-2.82391				-0.6086	-3.14868		-0.605	-3.25916		-0.6051	-3.30391		-0.6062	-3.23725				-0.6078	-3.04581		-0.6049	-3.26043		-0.6049	-3.3012		-0.6059	-3.20248				-0.6083	-3.03208		-0.605	-3.25633		-0.6033
	-0.6214	-2.8173		-0.6214	-2.8173		-0.6214	-2.8173		-0.6214	-2.8173				-0.6078	-3.14032		-0.6042	-3.25104		-0.6043	-3.29611		-0.6054	-3.22916				-0.6069	-3.03763		-0.6041	-3.25267		-0.6041	-3.29362		-0.605	-3.19464				-0.6075	-3.02406		-0.6042	-3.24803		-0.6024
	-0.6206	-2.81107		-0.6206	-2.81107		-0.6206	-2.81107		-0.6206	-2.81107				-0.607	-3.13218		-0.6033	-3.24276		-0.6034	-3.28836		-0.6046	-3.2211				-0.6061	-3.02961		-0.6032	-3.24451		-0.6032	-3.28601		-0.6042	-3.18671				-0.6067	-3.01619		-0.6034	-3.23965		-0.6016
	-0.6197	-2.80493		-0.6197	-2.80493		-0.6197	-2.80493		-0.6197	-2.80493				-0.6061	-3.12448		-0.6025	-3.23493		-0.6026	-3.28092		-0.6037	-3.21344				-0.6053	-3.02196		-0.6024	-3.23672		-0.6024	-3.27844		-0.6034	-3.17904				-0.6058	-3.00811		-0.6025	-3.23136		-0.6007
	-0.6189	-2.7986		-0.6189	-2.7986		-0.6189	-2.7986		-0.6189	-2.7986				-0.6053	-3.11679		-0.6017	-3.22702		-0.6017	-3.27311		-0.6029	-3.20564				-0.6044	-3.01439		-0.6016	-3.22885		-0.6016	-3.27116		-0.6025	-3.17147				-0.605	-3.00056		-0.6017	-3.22315		-0.5999
	-0.6181	-2.79237		-0.6181	-2.79237		-0.6181	-2.79237		-0.6181	-2.79237				-0.6045	-3.1088		-0.6008	-3.21896		-0.6009	-3.2656		-0.6021	-3.19779				-0.6036	-3.00665		-0.6007	-3.22105		-0.6007	-3.26352		-0.6017	-3.16374				-0.6042	-2.99311		-0.6008	-3.21496		-0.5991
	-0.6173	-2.78648		-0.6173	-2.78648		-0.6173	-2.78648		-0.6173	-2.78648				-0.6037	-3.10084		-0.6	-3.21112		-0.6001	-3.25806		-0.6013	-3.19001				-0.6028	-2.99913		-0.5999	-3.21339		-0.5999	-3.25633		-0.6009	-3.15629				-0.6033	-2.9859		-0.6	-3.20691		-0.5983
	-0.6164	-2.78042		-0.6164	-2.78042		-0.6164	-2.78042		-0.6164	-2.78042				-0.6028	-3.09291		-0.5992	-3.20322		-0.5993	-3.25057		-0.6004	-3.18223				-0.6019	-2.99183		-0.5991	-3.20502		-0.5991	-3.24903		-0.6	-3.14863				-0.6025	-2.9784		-0.5992	-3.19873		-0.5974
	-0.6156	-2.77443		-0.6156	-2.77443		-0.6156	-2.77443		-0.6156	-2.77443				-0.602	-3.08497		-0.5983	-3.19552		-0.5984	-3.24336		-0.5996	-3.17462				-0.6011	-2.98422		-0.5982	-3.19757		-0.5982	-3.24162		-0.5992	-3.14114				-0.6017	-2.97143		-0.5984	-3.19078		-0.5966
	-0.6147	-2.76828		-0.6147	-2.76828		-0.6147	-2.76828		-0.6147	-2.76828				-0.6011	-3.07707		-0.5975	-3.18802		-0.5976	-3.23605		-0.5987	-3.16705				-0.6003	-2.97675		-0.5974	-3.19017		-0.5974	-3.23374		-0.5984	-3.13355				-0.6008	-2.96417		-0.5975	-3.18296		-0.5958
	-0.6139	-2.76246		-0.6139	-2.76246		-0.6139	-2.76246		-0.6139	-2.76246				-0.6003	-3.06956		-0.5967	-3.18059		-0.5968	-3.22885		-0.5979	-3.15967				-0.5994	-2.9694		-0.5966	-3.18277		-0.5966	-3.22643		-0.5975	-3.1262				-0.6	-2.95703		-0.5967	-3.17509		-0.5949
	-0.6131	-2.75696		-0.6131	-2.75696		-0.6131	-2.75696		-0.6131	-2.75696				-0.5995	-3.06168		-0.5959	-3.17321		-0.5959	-3.22163		-0.5971	-3.15217				-0.5986	-2.96218		-0.5957	-3.17555		-0.5957	-3.21911		-0.5967	-3.11894				-0.5992	-2.94923		-0.5959	-3.16749		-0.5941
	-0.6123	-2.75129		-0.6123	-2.75129		-0.6123	-2.75129		-0.6123	-2.75129				-0.5987	-3.05379		-0.595	-3.16571		-0.5951	-3.21453		-0.5963	-3.14468				-0.5978	-2.95468		-0.5949	-3.16819		-0.5949	-3.21197		-0.5959	-3.11161				-0.5984	-2.94195		-0.595	-3.15958		-0.5933
	-0.6114	-2.74521		-0.6114	-2.74521		-0.6114	-2.74521		-0.6114	-2.74521				-0.5978	-3.04585		-0.5942	-3.15839		-0.5943	-3.20705		-0.5954	-3.1371				-0.597	-2.94731		-0.5941	-3.16109		-0.5941	-3.20475		-0.5951	-3.10438				-0.5975	-2.93442		-0.5942	-3.15187		-0.5925
	-0.6106	-2.73945		-0.6106	-2.73945		-0.6106	-2.73945		-0.6106	-2.73945				-0.597	-3.0381		-0.5934	-3.15095		-0.5935	-3.19997		-0.5946	-3.12967				-0.5961	-2.94006		-0.5933	-3.15403		-0.5933	-3.19784		-0.5942	-3.09731				-0.5967	-2.92738		-0.5934	-3.14418		-0.5916
	-0.6098	-2.734		-0.6098	-2.734		-0.6098	-2.734		-0.6098	-2.734				-0.5962	-3.03054		-0.5925	-3.14357		-0.5926	-3.19301		-0.5938	-3.12237				-0.5953	-2.93293		-0.5924	-3.14709		-0.5924	-3.19084		-0.5934	-3.09029				-0.5959	-2.92046		-0.5926	-3.1365		-0.5908
	-0.6089	-2.72862		-0.6089	-2.72862		-0.6089	-2.72862		-0.6089	-2.72862				-0.5953	-3.02264		-0.5917	-3.13638		-0.5918	-3.18609		-0.5929	-3.11504				-0.5945	-2.92628		-0.5916	-3.13996		-0.5916	-3.18376		-0.5926	-3.08333				-0.595	-2.91328		-0.5917	-3.12913		-0.59
	-0.6081	-2.72308		-0.6081	-2.72308		-0.6081	-2.72308		-0.6081	-2.72308				-0.5945	-3.01471		-0.5909	-3.12901		-0.591	-3.17908		-0.5921	-3.1076				-0.5936	-2.91901		-0.5908	-3.13295		-0.5908	-3.17698		-0.5917	-3.07631				-0.5942	-2.90658		-0.5909	-3.12171		-0.5891
	-0.6073	-2.7176		-0.6073	-2.7176		-0.6073	-2.7176		-0.6073	-2.7176				-0.5937	-3.00723		-0.59	-3.12154		-0.5902	-3.17224		-0.5913	-3.10033				-0.5928	-2.91257		-0.5899	-3.12587		-0.5899	-3.17005		-0.5909	-3.0695				-0.5934	-2.89928		-0.5901	-3.11424		-0.5883
	-0.6064	-2.7122		-0.6064	-2.7122		-0.6064	-2.7122		-0.6064	-2.7122				-0.5929	-3		-0.5892	-3.11436		-0.5893	-3.16526		-0.5905	-3.09321				-0.592	-2.90588		-0.5891	-3.11902		-0.5891	-3.16323		-0.5901	-3.06271				-0.5925	-2.89279		-0.5892	-3.10685		-0.5875
	-0.6056	-2.70708		-0.6056	-2.70708		-0.6056	-2.70708		-0.6056	-2.70708				-0.5921	-2.99268		-0.5884	-3.10729		-0.5885	-3.1587		-0.5897	-3.08623				-0.5912	-2.8986		-0.5883	-3.11227		-0.5883	-3.15652		-0.5893	-3.05579				-0.5917	-2.88639		-0.5884	-3.09947		-0.5866
	-0.6048	-2.70202		-0.6048	-2.70202		-0.6048	-2.70202		-0.6048	-2.70202				-0.5912	-2.98548		-0.5875	-3.10012		-0.5877	-3.15193		-0.5888	-3.07918				-0.5903	-2.89211		-0.5874	-3.1053		-0.5874	-3.14972		-0.5884	-3.04904				-0.5909	-2.87976		-0.5876	-3.09221		-0.5858
	-0.604	-2.6968		-0.604	-2.6968		-0.604	-2.6968		-0.604	-2.6968				-0.5904	-2.9784		-0.5867	-3.09318		-0.5868	-3.14515		-0.588	-3.07224				-0.5895	-2.88539		-0.5866	-3.0986		-0.5866	-3.14297		-0.5876	-3.04232				-0.5901	-2.87322		-0.5867	-3.08497		-0.585
	-0.6031	-2.69186		-0.6031	-2.69186		-0.6031	-2.69186		-0.6031	-2.69186				-0.5896	-2.97143		-0.5859	-3.08624		-0.586	-3.13841		-0.5872	-3.06536				-0.5886	-2.8791		-0.5858	-3.09184		-0.5858	-3.13626		-0.5867	-3.03573				-0.5892	-2.86678		-0.5859	-3.07769		-0.5842
	-0.6023	-2.68719		-0.6023	-2.68719		-0.6023	-2.68719		-0.6023	-2.68719				-0.5887	-2.96377		-0.5851	-3.07935		-0.5852	-3.13165		-0.5863	-3.05826				-0.5878	-2.87225		-0.585	-3.08508		-0.585	-3.12965		-0.5859	-3.02899				-0.5884	-2.86044		-0.5851	-3.07033		-0.5833
	-0.6015	-2.68256		-0.6015	-2.68256		-0.6015	-2.68256		-0.6015	-2.68256				-0.5879	-2.95664		-0.5842	-3.07268		-0.5843	-3.12505		-0.5855	-3.05146				-0.587	-2.8655		-0.5841	-3.07847		-0.5841	-3.12303		-0.5851	-3.02234				-0.5876	-2.85418		-0.5842	-3.06298		-0.5825
	-0.6006	-2.67778		-0.6006	-2.67778		-0.6006	-2.67778		-0.6006	-2.67778				-0.587	-2.94923		-0.5834	-3.06596		-0.5835	-3.11856		-0.5846	-3.04458				-0.5862	-2.85855		-0.5833	-3.07155		-0.5833	-3.11645		-0.5843	-3.01552				-0.5867	-2.84771		-0.5834	-3.05562		-0.5817
	-0.5998	-2.67305		-0.5998	-2.67305		-0.5998	-2.67305		-0.5998	-2.67305				-0.5862	-2.94233		-0.5826	-3.05938		-0.5827	-3.11193		-0.5838	-3.03788				-0.5853	-2.85201		-0.5825	-3.06495		-0.5825	-3.10975		-0.5834	-3.0089				-0.5859	-2.84134		-0.5826	-3.04823		-0.5808
	-0.599	-2.66837		-0.599	-2.66837		-0.599	-2.66837		-0.599	-2.66837				-0.5854	-2.93479		-0.5817	-3.05276		-0.5818	-3.10552		-0.583	-3.03102				-0.5845	-2.84558		-0.5816	-3.05809		-0.5816	-3.10331		-0.5826	-3.00233				-0.5851	-2.83476		-0.5818	-3.04082		-0.58
	-0.5981	-2.66394		-0.5981	-2.66394		-0.5981	-2.66394		-0.5981	-2.66394				-0.5846	-2.92775		-0.5809	-3.04619		-0.581	-3.09903		-0.5822	-3.02432				-0.5837	-2.83923		-0.5808	-3.05139		-0.5808	-3.0968		-0.5818	-2.99581				-0.5842	-2.82857		-0.5809	-3.03353		-0.5792
	-0.5973	-2.65936		-0.5973	-2.65936		-0.5973	-2.65936		-0.5973	-2.65936				-0.5837	-2.92082		-0.5801	-3.03958		-0.5802	-3.09264		-0.5813	-3.01768				-0.5828	-2.83327		-0.58	-3.04494		-0.58	-3.09028		-0.5809	-2.9895				-0.5834	-2.82218		-0.5801	-3.0265		-0.5784
	-0.5965	-2.65482		-0.5965	-2.65482		-0.5965	-2.65482		-0.5965	-2.65482				-0.5829	-2.914		-0.5793	-3.03287		-0.5794	-3.08635		-0.5805	-3.01107				-0.582	-2.82681		-0.5792	-3.03848		-0.5792	-3.08386		-0.5801	-2.98305				-0.5826	-2.81616		-0.5793	-3.01941		-0.5775
	-0.5957	-2.65014		-0.5957	-2.65014		-0.5957	-2.65014		-0.5957	-2.65014				-0.5821	-2.90693		-0.5784	-3.02613		-0.5785	-3.07982		-0.5797	-3.0043				-0.5812	-2.82074		-0.5783	-3.03217		-0.5783	-3.07753		-0.5793	-2.97681				-0.5818	-2.80967		-0.5785	-3.01251		-0.5767
	-0.5948	-2.64589		-0.5948	-2.64589		-0.5948	-2.64589		-0.5948	-2.64589				-0.5812	-2.89997		-0.5776	-3.01927		-0.5777	-3.07345		-0.5788	-2.99757				-0.5804	-2.81446		-0.5775	-3.02572		-0.5775	-3.07109		-0.5785	-2.97042				-0.5809	-2.80355		-0.5776	-3.00529		-0.5759
	-0.594	-2.64149		-0.594	-2.64149		-0.594	-2.64149		-0.594	-2.64149				-0.5804	-2.89347		-0.5768	-3.01269		-0.5769	-3.06722		-0.578	-2.99113				-0.5795	-2.80855		-0.5767	-3.01932		-0.5767	-3.0648		-0.5776	-2.96422				-0.5801	-2.79724		-0.5768	-2.99827		-0.575
	-0.5932	-2.63733		-0.5932	-2.63733		-0.5932	-2.63733		-0.5932	-2.63733				-0.5796	-2.88673		-0.5759	-3.00626		-0.576	-3.06078		-0.5772	-2.98459				-0.5787	-2.80217		-0.5758	-3.01305		-0.5758	-3.05854		-0.5768	-2.95792				-0.5793	-2.79129		-0.576	-2.9914		-0.5742
	-0.5923	-2.63264		-0.5923	-2.63264		-0.5923	-2.63264		-0.5923	-2.63264				-0.5788	-2.88008		-0.5751	-2.99957		-0.5752	-3.05473		-0.5764	-2.97813				-0.5779	-2.79615		-0.575	-3.00656		-0.575	-3.05213		-0.576	-2.95161				-0.5785	-2.78542		-0.5751	-2.9838		-0.5734
	-0.5915	-2.62838		-0.5915	-2.62838		-0.5915	-2.62838		-0.5915	-2.62838				-0.5779	-2.87322		-0.5743	-2.99353		-0.5744	-3.04847		-0.5755	-2.97174				-0.5771	-2.78995		-0.5742	-3.0003		-0.5742	-3.04595		-0.5752	-2.9454				-0.5776	-2.77937		-0.5743	-2.97675		-0.5725
	-0.5907	-2.62415		-0.5907	-2.62415		-0.5907	-2.62415		-0.5907	-2.62415				-0.5771	-2.86678		-0.5735	-2.98716		-0.5735	-3.04234		-0.5747	-2.96543				-0.5762	-2.78357		-0.5734	-2.99396		-0.5734	-3.03962		-0.5743	-2.93905				-0.5768	-2.7734		-0.5735	-2.9694		-0.5717
	-0.5899	-2.61997		-0.5899	-2.61997		-0.5899	-2.61997		-0.5899	-2.61997				-0.5763	-2.86012		-0.5726	-2.9813		-0.5727	-3.03626		-0.5739	-2.95923				-0.5754	-2.77754		-0.5725	-2.98758		-0.5725	-3.03339		-0.5735	-2.93284				-0.5759	-2.767		-0.5726	-2.96218		-0.5709
	-0.589	-2.61565		-0.589	-2.61565		-0.589	-2.61565		-0.589	-2.61565				-0.5754	-2.85356		-0.5718	-2.97469		-0.5719	-3.02989		-0.573	-2.95271				-0.5746	-2.77134		-0.5717	-2.98172		-0.5717	-3.0271		-0.5727	-2.92672				-0.5751	-2.76095		-0.5718	-2.95507		-0.5701
	-0.5882	-2.61137		-0.5882	-2.61137		-0.5882	-2.61137		-0.5882	-2.61137				-0.5746	-2.84741		-0.571	-2.96859		-0.5711	-3.02379		-0.5722	-2.9466				-0.5737	-2.76523		-0.5709	-2.9751		-0.5709	-3.02082		-0.5718	-2.92038				-0.5743	-2.75473		-0.571	-2.94769		-0.5692
	-0.5873	-2.6073		-0.5873	-2.6073		-0.5873	-2.6073		-0.5873	-2.6073				-0.5738	-2.84103		-0.5701	-2.96257		-0.5702	-3.01782		-0.5714	-2.94048				-0.5729	-2.75945		-0.57	-2.969		-0.57	-3.01462		-0.571	-2.91435				-0.5735	-2.74885		-0.5702	-2.94044		-0.5684
	-0.5865	-2.60345		-0.5865	-2.60345		-0.5865	-2.60345		-0.5865	-2.60345				-0.573	-2.83446		-0.5693	-2.95664		-0.5694	-3.01153		-0.5706	-2.93421				-0.5721	-2.7535		-0.5692	-2.96297		-0.5692	-3.00838		-0.5702	-2.90828				-0.5726	-2.7428		-0.5693	-2.93293		-0.5676
	-0.5857	-2.59946		-0.5857	-2.59946		-0.5857	-2.59946		-0.5857	-2.59946				-0.5721	-2.82827		-0.5685	-2.95039		-0.5686	-3.00555		-0.5697	-2.92807				-0.5712	-2.74715		-0.5684	-2.95664		-0.5684	-3.00187		-0.5693	-2.90189				-0.5718	-2.73684		-0.5685	-2.92592		-0.5667
	-0.5849	-2.59534		-0.5849	-2.59534		-0.5849	-2.59534		-0.5849	-2.59534				-0.5713	-2.82189		-0.5677	-2.94424		-0.5677	-2.99957		-0.5689	-2.9219				-0.5704	-2.74112		-0.5675	-2.95039		-0.5675	-2.99568		-0.5685	-2.89573				-0.571	-2.73095		-0.5677	-2.91865		-0.5659
	-0.584	-2.59125		-0.584	-2.59125		-0.584	-2.59125		-0.584	-2.59125				-0.5705	-2.81559		-0.5668	-2.93855		-0.5669	-2.99353		-0.5681	-2.91589				-0.5696	-2.73495		-0.5667	-2.94424		-0.5667	-2.98928		-0.5677	-2.88949				-0.5701	-2.72515		-0.5668	-2.91116		-0.5651
	-0.5832	-2.58754		-0.5832	-2.58754		-0.5832	-2.58754		-0.5832	-2.58754				-0.5696	-2.80911		-0.566	-2.93256		-0.5661	-2.98716		-0.5672	-2.90961				-0.5687	-2.72909		-0.5659	-2.93779		-0.5659	-2.98297		-0.5668	-2.88328				-0.5693	-2.71897		-0.566	-2.90379		-0.5642
	-0.5824	-2.58369		-0.5824	-2.58369		-0.5824	-2.58369		-0.5824	-2.58369				-0.5688	-2.803		-0.5652	-2.92665		-0.5653	-2.98088		-0.5664	-2.90351				-0.5679	-2.72285		-0.565	-2.93181		-0.5651	-2.97675		-0.566	-2.87714				-0.5685	-2.71287		-0.5652	-2.8962		-0.5634
	-0.5815	-2.57988		-0.5815	-2.57988		-0.5815	-2.57988		-0.5815	-2.57988				-0.568	-2.79697		-0.5643	-2.92082		-0.5644	-2.9751		-0.5656	-2.89763				-0.5671	-2.71693		-0.5642	-2.92518		-0.5642	-2.97021		-0.5652	-2.87077				-0.5677	-2.70664		-0.5643	-2.88874		-0.5626
	-0.5807	-2.57577		-0.5807	-2.57577		-0.5807	-2.57577		-0.5807	-2.57577				-0.5671	-2.79048		-0.5635	-2.91471		-0.5636	-2.969		-0.5647	-2.8914				-0.5663	-2.71086		-0.5634	-2.91865		-0.5634	-2.96417		-0.5644	-2.86456				-0.5668	-2.70093		-0.5635	-2.88107		-0.5618
	-0.5799	-2.57203		-0.5799	-2.57203		-0.5799	-2.57203		-0.5799	-2.57203				-0.5663	-2.78436		-0.5627	-2.90904		-0.5628	-2.96297		-0.5639	-2.88546				-0.5654	-2.70509		-0.5626	-2.91257		-0.5626	-2.95782		-0.5635	-2.8585				-0.566	-2.69508		-0.5627	-2.87322		-0.5609
	-0.5791	-2.56848		-0.5791	-2.56848		-0.5791	-2.56848		-0.5791	-2.56848				-0.5655	-2.77806		-0.5618	-2.90274		-0.5619	-2.95703		-0.5631	-2.87928				-0.5646	-2.69897		-0.5617	-2.90623		-0.5617	-2.95156		-0.5627	-2.85225				-0.5652	-2.68931		-0.5618	-2.8655		-0.5601
	-0.5782	-2.56479		-0.5782	-2.56479		-0.5782	-2.56479		-0.5782	-2.56479				-0.5646	-2.77186		-0.561	-2.89688		-0.5611	-2.95117		-0.5622	-2.8733				-0.5638	-2.69315		-0.5609	-2.89997		-0.5609	-2.94539		-0.5619	-2.84617				-0.5643	-2.68319		-0.561	-2.85792		-0.5593
	-0.5774	-2.56114		-0.5774	-2.56114		-0.5774	-2.56114		-0.5774	-2.56114				-0.5638	-2.76574		-0.5602	-2.89076		-0.5603	-2.945		-0.5614	-2.86717				-0.5629	-2.68719		-0.56	-2.89347		-0.5601	-2.93892		-0.561	-2.83986				-0.5635	-2.67716		-0.5602	-2.85017		-0.5584
	-0.5766	-2.55736		-0.5766	-2.55736		-0.5766	-2.55736		-0.5766	-2.55736				-0.563	-2.75945		-0.5593	-2.88439		-0.5594	-2.93892		-0.5606	-2.86092				-0.5621	-2.6811		-0.5592	-2.88706		-0.5592	-2.93256		-0.5602	-2.83357				-0.5627	-2.67142		-0.5594	-2.84224		-0.5576
	-0.5757	-2.55377		-0.5757	-2.55377		-0.5757	-2.55377		-0.5757	-2.55377				-0.5622	-2.75326		-0.5585	-2.87844		-0.5586	-2.9333		-0.5598	-2.855				-0.5613	-2.6751		-0.5584	-2.88074		-0.5584	-2.92628		-0.5594	-2.82738				-0.5618	-2.66555		-0.5585	-2.83446		-0.5568
	-0.5749	-2.55037		-0.5749	-2.55037		-0.5749	-2.55037		-0.5749	-2.55037				-0.5613	-2.74666		-0.5577	-2.87225		-0.5578	-2.92702		-0.5589	-2.84864				-0.5604	-2.66918		-0.5576	-2.87419		-0.5576	-2.91973		-0.5585	-2.82104				-0.561	-2.65956		-0.5577	-2.82652		-0.5559
	-0.5741	-2.54668		-0.5741	-2.54668		-0.5741	-2.54668		-0.5741	-2.54668				-0.5605	-2.74065		-0.5568	-2.86646		-0.5569	-2.92082		-0.5581	-2.84264				-0.5596	-2.66354		-0.5567	-2.86774		-0.5567	-2.91293		-0.5577	-2.81474				-0.5602	-2.65345		-0.5569	-2.81844		-0.5551
	-0.5732	-2.54303		-0.5732	-2.54303		-0.5732	-2.54303		-0.5732	-2.54303				-0.5597	-2.73471		-0.556	-2.86012		-0.5561	-2.91507		-0.5573	-2.83663				-0.5588	-2.65738		-0.5559	-2.86107		-0.5559	-2.90658		-0.5569	-2.80834				-0.5593	-2.64724		-0.556	-2.81023		-0.5543
	-0.5724	-2.53955		-0.5724	-2.53955		-0.5724	-2.53955		-0.5724	-2.53955				-0.5588	-2.72862		-0.5552	-2.85418		-0.5553	-2.90868		-0.5564	-2.8305				-0.558	-2.65131		-0.5551	-2.85449		-0.5551	-2.89997		-0.5561	-2.80192				-0.5585	-2.6413		-0.5552	-2.80217		-0.5535
	-0.5716	-2.53626		-0.5716	-2.53626		-0.5716	-2.53626		-0.5716	-2.53626				-0.558	-2.72239		-0.5544	-2.84802		-0.5545	-2.90274		-0.5556	-2.82438				-0.5571	-2.64512		-0.5543	-2.84741		-0.5543	-2.89347		-0.5552	-2.79533				-0.5577	-2.63507		-0.5544	-2.79398		-0.5527
	-0.5708	-2.53284		-0.5708	-2.53284		-0.5708	-2.53284		-0.5708	-2.53284				-0.5572	-2.71625		-0.5535	-2.84164		-0.5536	-2.89654		-0.5548	-2.81814				-0.5563	-2.63922		-0.5534	-2.84073		-0.5534	-2.88673		-0.5544	-2.78889				-0.5569	-2.62893		-0.5535	-2.78542		-0.5518
	-0.5699	-2.52915		-0.5699	-2.52915		-0.5699	-2.52915		-0.5699	-2.52915				-0.5563	-2.71019		-0.5527	-2.83565		-0.5528	-2.89008		-0.5539	-2.81197				-0.5555	-2.63302		-0.5526	-2.83387		-0.5526	-2.87976		-0.5536	-2.78221				-0.556	-2.62269		-0.5527	-2.77702		-0.551
	-0.5691	-2.52564		-0.5691	-2.52564		-0.5691	-2.52564		-0.5691	-2.52564				-0.5555	-2.70421		-0.5519	-2.82944		-0.552	-2.88406		-0.5531	-2.8059				-0.5546	-2.62654		-0.5518	-2.82681		-0.5518	-2.8729		-0.5527	-2.77542				-0.5552	-2.61654		-0.5519	-2.76853		-0.5501
	-0.5683	-2.52244		-0.5683	-2.52244		-0.5683	-2.52244		-0.5683	-2.52244				-0.5547	-2.6981		-0.5511	-2.82333		-0.5512	-2.87778		-0.5523	-2.79974				-0.5538	-2.62051		-0.551	-2.81959		-0.551	-2.86582		-0.5519	-2.76864				-0.5544	-2.61013		-0.5511	-2.7602		-0.5493
	-0.5674	-2.51913		-0.5674	-2.51913		-0.5674	-2.51913		-0.5674	-2.51913				-0.5539	-2.69208		-0.5502	-2.8173		-0.5503	-2.87128		-0.5515	-2.79355				-0.553	-2.61422		-0.5501	-2.81248		-0.5501	-2.85886		-0.5511	-2.76185				-0.5535	-2.60398		-0.5502	-2.75178		-0.5485
	-0.5666	-2.5157		-0.5666	-2.5157		-0.5666	-2.5157		-0.5666	-2.5157				-0.553	-2.68592		-0.5494	-2.81107		-0.5495	-2.86487		-0.5506	-2.78729				-0.5522	-2.60818		-0.5493	-2.80549		-0.5493	-2.85171		-0.5503	-2.75512				-0.5527	-2.59791		-0.5494	-2.74256		-0.5476
	-0.5658	-2.5123		-0.5658	-2.5123		-0.5658	-2.5123		-0.5658	-2.5123				-0.5522	-2.67965		-0.5485	-2.80465		-0.5486	-2.85824		-0.5498	-2.78085				-0.5513	-2.60189		-0.5484	-2.79806		-0.5484	-2.84466		-0.5494	-2.7482				-0.5519	-2.59159		-0.5486	-2.73424		-0.5468
	-0.565	-2.50906		-0.565	-2.50906		-0.565	-2.50906		-0.565	-2.50906				-0.5514	-2.67325		-0.5477	-2.79833		-0.5478	-2.85201		-0.549	-2.77453				-0.5505	-2.59568		-0.5476	-2.79075		-0.5476	-2.83744		-0.5486	-2.74129				-0.5511	-2.5857		-0.5477	-2.72538		-0.546
	-0.5641	-2.50598		-0.5641	-2.50598		-0.5641	-2.50598		-0.5641	-2.50598				-0.5505	-2.66736		-0.5469	-2.79183		-0.547	-2.84527		-0.5481	-2.76815				-0.5496	-2.58956		-0.5468	-2.78357		-0.5468	-2.83003		-0.5477	-2.73439				-0.5502	-2.57938		-0.5469	-2.71693		-0.5452
	-0.5633	-2.50279		-0.5633	-2.50279		-0.5633	-2.50279		-0.5633	-2.50279				-0.5497	-2.66095		-0.5461	-2.78516		-0.5462	-2.83833		-0.5473	-2.76148				-0.5488	-2.58303		-0.546	-2.77624		-0.546	-2.82275		-0.5469	-2.72734				-0.5494	-2.573		-0.5461	-2.70797		-0.5443
	-0.5625	-2.49963		-0.5625	-2.49963		-0.5625	-2.49963		-0.5625	-2.49963				-0.5489	-2.65502		-0.5452	-2.77859		-0.5453	-2.8315		-0.5465	-2.75504				-0.548	-2.57692		-0.5451	-2.76853		-0.5451	-2.81502		-0.5461	-2.72016				-0.5486	-2.56671		-0.5452	-2.69897		-0.5435
	-0.5616	-2.49635		-0.5616	-2.49635		-0.5616	-2.49635		-0.5616	-2.49635				-0.548	-2.64878		-0.5444	-2.77186		-0.5445	-2.82478		-0.5456	-2.74847				-0.5472	-2.57057		-0.5443	-2.7607		-0.5443	-2.80771		-0.5453	-2.71299				-0.5477	-2.56019		-0.5444	-2.69058		-0.5427
	-0.5608	-2.49322		-0.5608	-2.49322		-0.5608	-2.49322		-0.5608	-2.49322				-0.5472	-2.64264		-0.5436	-2.76548		-0.5437	-2.81787		-0.5448	-2.742				-0.5463	-2.56431		-0.5435	-2.75301		-0.5435	-2.79997		-0.5444	-2.70576				-0.5469	-2.55408		-0.5436	-2.68173		-0.5418
	-0.56	-2.49039		-0.56	-2.49039		-0.56	-2.49039		-0.56	-2.49039				-0.5464	-2.63658		-0.5427	-2.75895		-0.5429	-2.81135		-0.544	-2.73563				-0.5455	-2.55783		-0.5426	-2.74449		-0.5426	-2.79237		-0.5436	-2.69823				-0.5461	-2.54775		-0.5428	-2.67325		-0.541
	-0.5591	-2.48718		-0.5591	-2.48718		-0.5591	-2.48718		-0.5591	-2.48718				-0.5456	-2.63004		-0.5419	-2.75203		-0.542	-2.8041		-0.5432	-2.72872				-0.5447	-2.55129		-0.5418	-2.73636		-0.5418	-2.78463		-0.5428	-2.69076				-0.5452	-2.54121		-0.5419	-2.66474		-0.5402
	-0.5583	-2.48399		-0.5583	-2.48399		-0.5583	-2.48399		-0.5583	-2.48399				-0.5447	-2.62397		-0.5411	-2.74521		-0.5412	-2.79697		-0.5423	-2.72205				-0.5438	-2.54485		-0.541	-2.72839		-0.541	-2.77702		-0.5419	-2.68342				-0.5444	-2.53506		-0.5411	-2.6562		-0.5393
	-0.5575	-2.48096		-0.5575	-2.48096		-0.5575	-2.48096		-0.5575	-2.48096				-0.5439	-2.61744		-0.5403	-2.73802		-0.5404	-2.78995		-0.5415	-2.71514				-0.543	-2.53835		-0.5401	-2.71988		-0.5402	-2.76904		-0.5411	-2.67576				-0.5436	-2.52856		-0.5403	-2.64762		-0.5385
	-0.5566	-2.47808		-0.5566	-2.47808		-0.5566	-2.47808		-0.5566	-2.47808				-0.5431	-2.61119		-0.5394	-2.73095		-0.5395	-2.78252		-0.5407	-2.70822				-0.5422	-2.5321		-0.5393	-2.71153		-0.5393	-2.7612		-0.5403	-2.66827				-0.5427	-2.52244		-0.5394	-2.63903		-0.5377
	-0.5558	-2.47508		-0.5558	-2.47508		-0.5558	-2.47508		-0.5558	-2.47508				-0.5422	-2.60485		-0.5386	-2.72354		-0.5387	-2.77521		-0.5398	-2.7012				-0.5414	-2.52578		-0.5385	-2.70268		-0.5385	-2.75301		-0.5395	-2.66049				-0.5419	-2.51599		-0.5386	-2.6306		-0.5368
	-0.555	-2.47211		-0.555	-2.47211		-0.555	-2.47211		-0.555	-2.47211				-0.5414	-2.59825		-0.5377	-2.71625		-0.5378	-2.76802		-0.539	-2.69417				-0.5405	-2.51971		-0.5376	-2.69422		-0.5376	-2.74449		-0.5386	-2.6528				-0.5411	-2.50962		-0.5378	-2.62197		-0.536
	-0.5542	-2.46903		-0.5542	-2.46903		-0.5542	-2.46903		-0.5542	-2.46903				-0.5406	-2.59193		-0.5369	-2.70885		-0.537	-2.7602		-0.5382	-2.68699				-0.5397	-2.51343		-0.5368	-2.68571		-0.5368	-2.73589		-0.5378	-2.64501				-0.5403	-2.50349		-0.5369	-2.61368		-0.5352
	-0.5533	-2.4661		-0.5533	-2.4661		-0.5533	-2.4661		-0.5533	-2.4661				-0.5398	-2.58536		-0.5361	-2.70137		-0.5362	-2.75301		-0.5374	-2.67991				-0.5389	-2.5071		-0.536	-2.67675		-0.536	-2.72746		-0.537	-2.6371				-0.5394	-2.4973		-0.5361	-2.60555		-0.5344
	-0.5525	-2.46344		-0.5525	-2.46344		-0.5525	-2.46344		-0.5525	-2.46344				-0.5389	-2.57922		-0.5353	-2.694		-0.5354	-2.74449		-0.5365	-2.67257				-0.538	-2.50059		-0.5352	-2.66817		-0.5352	-2.71874		-0.5361	-2.62917				-0.5386	-2.49147		-0.5353	-2.59757		-0.5335
	-0.5517	-2.46055		-0.5517	-2.46055		-0.5517	-2.46055		-0.5517	-2.46055				-0.5381	-2.57284		-0.5344	-2.68613		-0.5345	-2.7366		-0.5357	-2.66519				-0.5372	-2.49404		-0.5343	-2.65916		-0.5343	-2.70974		-0.5353	-2.62098				-0.5378	-2.48505		-0.5344	-2.58956		-0.5327
	-0.5508	-2.45767		-0.5508	-2.45767		-0.5508	-2.45767		-0.5508	-2.45767				-0.5372	-2.56655		-0.5336	-2.6784		-0.5337	-2.72886		-0.5348	-2.65794				-0.5364	-2.48825		-0.5335	-2.65014		-0.5335	-2.70093		-0.5345	-2.61311				-0.5369	-2.47912		-0.5336	-2.58137		-0.5319
	-0.55	-2.45469		-0.55	-2.45469		-0.55	-2.45469		-0.55	-2.45469				-0.5364	-2.56019		-0.5328	-2.6706		-0.5329	-2.72056		-0.534	-2.65045				-0.5355	-2.48214		-0.5327	-2.64149		-0.5327	-2.69208		-0.5336	-2.60524				-0.5361	-2.47301		-0.5328	-2.57381		-0.531
	-0.5492	-2.45198		-0.5492	-2.45198		-0.5492	-2.45198		-0.5492	-2.45198				-0.5356	-2.55362		-0.532	-2.66254		-0.5321	-2.71242		-0.5332	-2.64286				-0.5347	-2.47638		-0.5318	-2.63246		-0.5318	-2.68277		-0.5328	-2.5972				-0.5353	-2.46686		-0.532	-2.56607		-0.5302
	-0.5483	-2.44928		-0.5483	-2.44928		-0.5483	-2.44928		-0.5483	-2.44928				-0.5348	-2.54745		-0.5311	-2.65482		-0.5312	-2.70421		-0.5324	-2.63549				-0.5339	-2.47044		-0.531	-2.62361		-0.531	-2.67407		-0.532	-2.58937				-0.5344	-2.46105		-0.5311	-2.55878		-0.5294
	-0.5475	-2.44648		-0.5475	-2.44648		-0.5475	-2.44648		-0.5475	-2.44648				-0.5339	-2.54091		-0.5303	-2.64666		-0.5304	-2.69572		-0.5315	-2.62777				-0.533	-2.46445		-0.5302	-2.61475		-0.5302	-2.66454		-0.5311	-2.58125				-0.5336	-2.45519		-0.5303	-2.55129		-0.5286
	-0.5467	-2.4437		-0.5467	-2.4437		-0.5467	-2.4437		-0.5467	-2.4437				-0.5331	-2.53462		-0.5295	-2.63846		-0.5296	-2.6874		-0.5307	-2.62016				-0.5322	-2.45855		-0.5293	-2.60642		-0.5294	-2.65541		-0.5303	-2.57346				-0.5328	-2.44965		-0.5295	-2.54379		-0.5277
	-0.5459	-2.44105		-0.5459	-2.44105		-0.5459	-2.44105		-0.5459	-2.44105				-0.5323	-2.52812		-0.5286	-2.63004		-0.5287	-2.67861		-0.5299	-2.61226				-0.5314	-2.4521		-0.5285	-2.59791		-0.5285	-2.64628		-0.5295	-2.56543				-0.532	-2.44394		-0.5287	-2.5367		-0.5269
	-0.545	-2.43854		-0.545	-2.43854		-0.545	-2.43854		-0.545	-2.43854				-0.5314	-2.52158		-0.5278	-2.6216		-0.5279	-2.66999		-0.529	-2.60439				-0.5306	-2.44624		-0.5277	-2.58922		-0.5277	-2.63714		-0.5287	-2.55753				-0.5311	-2.43854		-0.5278	-2.5293		-0.5261
	-0.5442	-2.43593		-0.5442	-2.43593		-0.5442	-2.43593		-0.5442	-2.43593				-0.5306	-2.51527		-0.527	-2.6135		-0.5271	-2.66154		-0.5282	-2.59677				-0.5297	-2.44033		-0.5269	-2.58087		-0.5269	-2.62819		-0.5278	-2.5498				-0.5303	-2.43321		-0.527	-2.52216		-0.5252
	-0.5434	-2.43333		-0.5434	-2.43333		-0.5434	-2.43333		-0.5434	-2.43333				-0.5298	-2.50892		-0.5262	-2.60537		-0.5262	-2.65287		-0.5274	-2.58905				-0.5289	-2.43474		-0.526	-2.57251		-0.526	-2.61925		-0.527	-2.54217				-0.5295	-2.42771		-0.5262	-2.51513		-0.5244
	-0.5425	-2.43063		-0.5425	-2.43063		-0.5425	-2.43063		-0.5425	-2.43063				-0.5289	-2.50266		-0.5253	-2.59722		-0.5254	-2.64397		-0.5265	-2.58128				-0.5281	-2.42911		-0.5252	-2.56431		-0.5252	-2.60995		-0.5262	-2.53446				-0.5286	-2.42239		-0.5253	-2.50822		-0.5236
	-0.5417	-2.42806		-0.5417	-2.42806		-0.5417	-2.42806		-0.5417	-2.42806				-0.5281	-2.49635		-0.5245	-2.58889		-0.5246	-2.63526		-0.5257	-2.5735				-0.5273	-2.42354		-0.5244	-2.55596		-0.5244	-2.60119		-0.5254	-2.5269				-0.5278	-2.41691		-0.5245	-2.50141		-0.5227
	-0.5409	-2.42562		-0.5409	-2.42562		-0.5409	-2.42562		-0.5409	-2.42562				-0.5273	-2.49026		-0.5236	-2.58087		-0.5237	-2.62635		-0.5249	-2.56583				-0.5264	-2.41805		-0.5235	-2.54806		-0.5235	-2.59227		-0.5245	-2.51946				-0.527	-2.41162		-0.5236	-2.49444		-0.5219
	-0.5401	-2.42297		-0.5401	-2.42297		-0.5401	-2.42297		-0.5401	-2.42297				-0.5265	-2.48399		-0.5228	-2.57284		-0.5229	-2.61744		-0.5241	-2.55809				-0.5256	-2.41251		-0.5227	-2.54		-0.5227	-2.58336		-0.5237	-2.51196				-0.5262	-2.40616		-0.5228	-2.48812		-0.5211
	-0.5392	-2.42033		-0.5392	-2.42033		-0.5392	-2.42033		-0.5392	-2.42033				-0.5256	-2.47782		-0.522	-2.56511		-0.5221	-2.60889		-0.5232	-2.55061				-0.5247	-2.40716		-0.5219	-2.5321		-0.5219	-2.57496		-0.5228	-2.50474				-0.5253	-2.40099		-0.522	-2.48149		-0.5203
	-0.5384	-2.41782		-0.5384	-2.41782		-0.5384	-2.41782		-0.5384	-2.41782				-0.5248	-2.47185		-0.5212	-2.55721		-0.5213	-2.59998		-0.5224	-2.54301				-0.5239	-2.40176		-0.521	-2.52418		-0.521	-2.56623		-0.522	-2.49739				-0.5245	-2.39599		-0.5212	-2.47496		-0.5194
	-0.5375	-2.41544		-0.5375	-2.41544		-0.5375	-2.41544		-0.5375	-2.41544				-0.524	-2.46572		-0.5203	-2.54914		-0.5204	-2.59142		-0.5216	-2.53543				-0.5231	-2.39653		-0.5202	-2.51656		-0.5202	-2.55783		-0.5212	-2.49031				-0.5236	-2.39094		-0.5203	-2.46865		-0.5186
	-0.5367	-2.41308		-0.5367	-2.41308		-0.5367	-2.41308		-0.5367	-2.41308				-0.5232	-2.4598		-0.5195	-2.54166		-0.5196	-2.58286		-0.5208	-2.52811				-0.5223	-2.39115		-0.5194	-2.5092		-0.5194	-2.54975		-0.5204	-2.48337				-0.5228	-2.38616		-0.5195	-2.46231		-0.5177
	-0.5359	-2.41061		-0.5359	-2.41061		-0.5359	-2.41061		-0.5359	-2.41061				-0.5223	-2.45395		-0.5187	-2.53402		-0.5188	-2.5743		-0.5199	-2.52076				-0.5214	-2.38595		-0.5186	-2.50169		-0.5186	-2.54151		-0.5195	-2.47638				-0.522	-2.38112		-0.5187	-2.45643		-0.5169
	-0.5351	-2.40805		-0.5351	-2.40805		-0.5351	-2.40805		-0.5351	-2.40805				-0.5215	-2.44818		-0.5178	-2.52666		-0.5179	-2.56575		-0.5191	-2.51353				-0.5206	-2.38101		-0.5177	-2.49458		-0.5177	-2.53373		-0.5187	-2.46977				-0.5212	-2.37613		-0.5179	-2.45026		-0.5161
	-0.5342	-2.40583		-0.5342	-2.40583		-0.5342	-2.40583		-0.5342	-2.40583				-0.5207	-2.44261		-0.517	-2.51942		-0.5171	-2.55721		-0.5183	-2.50641				-0.5198	-2.37603		-0.5169	-2.48758		-0.5169	-2.52549		-0.5179	-2.46303				-0.5203	-2.37141		-0.517	-2.44442		-0.5153
	-0.5334	-2.40362		-0.5334	-2.40362		-0.5334	-2.40362		-0.5334	-2.40362				-0.5198	-2.43676		-0.5162	-2.51215		-0.5163	-2.54883		-0.5174	-2.49925				-0.5189	-2.3713		-0.5161	-2.4807		-0.5161	-2.51741		-0.517	-2.45647				-0.5195	-2.36653		-0.5162	-2.43842		-0.5144
	-0.5326	-2.40132		-0.5326	-2.40132		-0.5326	-2.40132		-0.5326	-2.40132				-0.519	-2.43133		-0.5154	-2.50501		-0.5154	-2.54106		-0.5166	-2.49247				-0.5181	-2.36623		-0.5152	-2.47405		-0.5152	-2.50976		-0.5162	-2.45001				-0.5187	-2.36211		-0.5154	-2.43274		-0.5136
	-0.5318	-2.39881		-0.5318	-2.39881		-0.5318	-2.39881		-0.5318	-2.39881				-0.5182	-2.42551		-0.5145	-2.49771		-0.5146	-2.53313		-0.5158	-2.48545				-0.5173	-2.36141		-0.5144	-2.46712		-0.5144	-2.5021		-0.5154	-2.44354				-0.5178	-2.35734		-0.5145	-2.4269		-0.5128
	-0.5309	-2.39642		-0.5309	-2.39642		-0.5309	-2.39642		-0.5309	-2.39642				-0.5173	-2.41987		-0.5137	-2.49093		-0.5138	-2.52506		-0.5149	-2.47862				-0.5165	-2.35645		-0.5136	-2.46092		-0.5136	-2.49471		-0.5146	-2.43736				-0.517	-2.35301		-0.5137	-2.42102		-0.5119
	-0.5301	-2.39426		-0.5301	-2.39426		-0.5301	-2.39426		-0.5301	-2.39426				-0.5165	-2.4142		-0.5128	-2.48386		-0.513	-2.51741		-0.5141	-2.47182				-0.5156	-2.35135		-0.5127	-2.4542		-0.5128	-2.48745		-0.5137	-2.431				-0.5162	-2.34863		-0.5129	-2.41544		-0.5111
	-0.5293	-2.39212		-0.5293	-2.39212		-0.5293	-2.39212		-0.5293	-2.39212				-0.5157	-2.40849		-0.512	-2.47703		-0.5121	-2.50962		-0.5133	-2.46505				-0.5148	-2.34669		-0.5119	-2.44794		-0.5119	-2.47991		-0.5129	-2.42485				-0.5154	-2.34409		-0.512	-2.40972		-0.5103
	-0.5284	-2.38977		-0.5284	-2.38977		-0.5284	-2.38977		-0.5284	-2.38977				-0.5148	-2.40318		-0.5112	-2.47044		-0.5113	-2.5021		-0.5124	-2.45858				-0.514	-2.3418		-0.5111	-2.44177		-0.5111	-2.47289		-0.5121	-2.41882				-0.5145	-2.3397		-0.5112	-2.40428		-0.5095
	-0.5276	-2.38732		-0.5276	-2.38732		-0.5276	-2.38732		-0.5276	-2.38732				-0.514	-2.39761		-0.5103	-2.46382		-0.5105	-2.49458		-0.5116	-2.452				-0.5131	-2.33743		-0.5102	-2.43545		-0.5102	-2.46585		-0.5112	-2.41291				-0.5137	-2.33489		-0.5104	-2.39903		-0.5086
	-0.5268	-2.38521		-0.5268	-2.38521		-0.5268	-2.38521		-0.5268	-2.38521				-0.5132	-2.39265		-0.5095	-2.45767		-0.5096	-2.48678		-0.5108	-2.4457				-0.5123	-2.33273		-0.5094	-2.42922		-0.5094	-2.4588		-0.5104	-2.40692				-0.5129	-2.3305		-0.5095	-2.39373		-0.5078
	-0.5259	-2.3831		-0.5259	-2.3831		-0.5259	-2.3831		-0.5259	-2.3831				-0.5123	-2.38753		-0.5087	-2.45112		-0.5088	-2.47965		-0.5099	-2.43943				-0.5115	-2.32836		-0.5086	-2.42285		-0.5086	-2.4521		-0.5096	-2.40111				-0.512	-2.32615		-0.5087	-2.3886		-0.507
	-0.5251	-2.38091		-0.5251	-2.38091		-0.5251	-2.38091		-0.5251	-2.38091				-0.5115	-2.38237		-0.5079	-2.44515		-0.508	-2.4725		-0.5091	-2.43334				-0.5106	-2.32395		-0.5078	-2.41691		-0.5078	-2.44539		-0.5087	-2.39542				-0.5112	-2.32194		-0.5079	-2.38331		-0.5061
	-0.5243	-2.37851		-0.5243	-2.37851		-0.5243	-2.37851		-0.5243	-2.37851				-0.5107	-2.37706		-0.507	-2.43878		-0.5071	-2.46534		-0.5083	-2.42706				-0.5098	-2.31948		-0.5069	-2.41094		-0.5069	-2.43878		-0.5079	-2.38974				-0.5104	-2.31785		-0.5071	-2.37862		-0.5053
	-0.5234	-2.37634		-0.5234	-2.37634		-0.5234	-2.37634		-0.5234	-2.37634				-0.5099	-2.37182		-0.5062	-2.43262		-0.5063	-2.45855		-0.5075	-2.42099				-0.509	-2.31533		-0.5061	-2.40517		-0.5061	-2.43239		-0.5071	-2.3843				-0.5095	-2.31363		-0.5062	-2.37345		-0.5045
	-0.5226	-2.37428		-0.5226	-2.37428		-0.5226	-2.37428		-0.5226	-2.37428				-0.509	-2.36683		-0.5054	-2.42608		-0.5055	-2.45173		-0.5066	-2.41488				-0.5081	-2.31087		-0.5053	-2.39979		-0.5053	-2.42574		-0.5062	-2.3788				-0.5087	-2.3098		-0.5054	-2.36866		-0.5036
	-0.5218	-2.37222		-0.5218	-2.37222		-0.5218	-2.37222		-0.5218	-2.37222				-0.5082	-2.36191		-0.5046	-2.41999		-0.5046	-2.44503		-0.5058	-2.40897				-0.5073	-2.30662		-0.5044	-2.39426		-0.5044	-2.41953		-0.5054	-2.37347				-0.5079	-2.30583		-0.5046	-2.36401		-0.5028
	-0.521	-2.37008		-0.521	-2.37008		-0.521	-2.37008		-0.521	-2.37008				-0.5074	-2.35724		-0.5037	-2.41443		-0.5038	-2.43866		-0.505	-2.40344				-0.5065	-2.30207		-0.5036	-2.38902		-0.5036	-2.41341		-0.5046	-2.36817				-0.507	-2.3019		-0.5037	-2.35922		-0.502
	-0.5201	-2.36785		-0.5201	-2.36785		-0.5201	-2.36785		-0.5201	-2.36785				-0.5065	-2.35242		-0.5029	-2.40849		-0.503	-2.43239		-0.5041	-2.39777				-0.5057	-2.29791		-0.5028	-2.38373		-0.5028	-2.40738		-0.5038	-2.36301				-0.5062	-2.298		-0.5029	-2.35487		-0.5012
	-0.5193	-2.36583		-0.5193	-2.36583		-0.5193	-2.36583		-0.5193	-2.36583				-0.5057	-2.34775		-0.5021	-2.40263		-0.5022	-2.42632		-0.5033	-2.39223				-0.5048	-2.29379		-0.502	-2.37851		-0.502	-2.40165		-0.5029	-2.35798				-0.5054	-2.29414		-0.5021	-2.35018		-0.5003
	-0.5185	-2.36391		-0.5185	-2.36391		-0.5185	-2.36391		-0.5185	-2.36391				-0.5049	-2.34314		-0.5012	-2.39707		-0.5013	-2.42022		-0.5025	-2.38681				-0.504	-2.2898		-0.5011	-2.37335		-0.5011	-2.39588		-0.5021	-2.35301				-0.5046	-2.29056		-0.5013	-2.34573		-0.4995
	-0.5176	-2.36181		-0.5176	-2.36181		-0.5176	-2.36181		-0.5176	-2.36181				-0.5041	-2.33828		-0.5004	-2.3919		-0.5005	-2.41386		-0.5017	-2.38135				-0.5032	-2.28601		-0.5003	-2.36815		-0.5003	-2.39009		-0.5013	-2.34808				-0.5037	-2.28668		-0.5004	-2.34094		-0.4987
	-0.5168	-2.35962		-0.5168	-2.35962		-0.5168	-2.35962		-0.5168	-2.35962				-0.5032	-2.33386		-0.4996	-2.38669		-0.4997	-2.40816		-0.5008	-2.37623				-0.5023	-2.28191		-0.4994	-2.36311		-0.4994	-2.38458		-0.5004	-2.3432				-0.5029	-2.28316		-0.4996	-2.33649		-0.4978
	-0.516	-2.35754		-0.516	-2.35754		-0.516	-2.35754		-0.516	-2.35754				-0.5024	-2.32911		-0.4987	-2.38122		-0.4988	-2.4022		-0.5	-2.37084				-0.5015	-2.27827		-0.4986	-2.35793		-0.4986	-2.37872		-0.4996	-2.33831				-0.5021	-2.27926		-0.4987	-2.33208		-0.497
	-0.5151	-2.35576		-0.5151	-2.35576		-0.5151	-2.35576		-0.5151	-2.35576				-0.5016	-2.32468		-0.4979	-2.37623		-0.498	-2.39621		-0.4992	-2.36571				-0.5007	-2.27433		-0.4978	-2.3532		-0.4978	-2.37325		-0.4988	-2.3336				-0.5012	-2.2754		-0.4979	-2.32735		-0.4962
	-0.5143	-2.35389		-0.5143	-2.35389		-0.5143	-2.35389		-0.5143	-2.35389				-0.5007	-2.32021		-0.4971	-2.3709		-0.4972	-2.39083		-0.4983	-2.36065				-0.4999	-2.27059		-0.497	-2.34824		-0.497	-2.36805		-0.498	-2.32896				-0.5004	-2.27181		-0.4971	-2.32276		-0.4953
	-0.5135	-2.35193		-0.5135	-2.35193		-0.5135	-2.35193		-0.5135	-2.35193				-0.4999	-2.31569		-0.4962	-2.36613		-0.4963	-2.385		-0.4975	-2.35561				-0.499	-2.2668		-0.4961	-2.34361		-0.4961	-2.36261		-0.4971	-2.32434				-0.4996	-2.26825		-0.4963	-2.31822		-0.4945
	-0.5127	-2.34979		-0.5127	-2.34979		-0.5127	-2.34979		-0.5127	-2.34979				-0.4991	-2.31149		-0.4954	-2.36131		-0.4955	-2.37924		-0.4967	-2.35068				-0.4982	-2.26297		-0.4953	-2.33885		-0.4953	-2.35744		-0.4963	-2.31975				-0.4987	-2.26496		-0.4954	-2.31417		-0.4937
	-0.5118	-2.34795		-0.5118	-2.34795		-0.5118	-2.34795		-0.5118	-2.34795				-0.4982	-2.30706		-0.4946	-2.35615		-0.4947	-2.37376		-0.4958	-2.34566				-0.4974	-2.25948		-0.4945	-2.33386		-0.4945	-2.35223		-0.4955	-2.31519				-0.4979	-2.26138		-0.4946	-2.30998		-0.4928
	-0.511	-2.34621		-0.511	-2.34621		-0.511	-2.34621		-0.511	-2.34621				-0.4974	-2.30312		-0.4938	-2.35135		-0.4939	-2.36825		-0.495	-2.34091				-0.4965	-2.25563		-0.4937	-2.32948		-0.4937	-2.34688		-0.4946	-2.31066				-0.4971	-2.25814		-0.4938	-2.30583		-0.492
	-0.5102	-2.34448		-0.5102	-2.34448		-0.5102	-2.34448		-0.5102	-2.34448				-0.4966	-2.29886		-0.4929	-2.34602		-0.493	-2.36321		-0.4942	-2.33603				-0.4957	-2.2522		-0.4928	-2.32477		-0.4928	-2.34189		-0.4938	-2.30629				-0.4962	-2.25461		-0.4929	-2.30173		-0.4912
	-0.5093	-2.34247		-0.5093	-2.34247		-0.5093	-2.34247		-0.5093	-2.34247				-0.4957	-2.29491		-0.4921	-2.34151		-0.4922	-2.35803		-0.4933	-2.33148				-0.4949	-2.24841		-0.492	-2.32012		-0.492	-2.33668		-0.493	-2.30174				-0.4954	-2.25135		-0.4921	-2.29731		-0.4904
	-0.5085	-2.34056		-0.5085	-2.34056		-0.5085	-2.34056		-0.5085	-2.34056				-0.4949	-2.29107		-0.4913	-2.33677		-0.4914	-2.35281		-0.4925	-2.32688				-0.494	-2.24481		-0.4912	-2.31524		-0.4912	-2.33152		-0.4921	-2.29719				-0.4946	-2.24826		-0.4913	-2.29328		-0.4895
	-0.5077	-2.33885		-0.5077	-2.33885		-0.5077	-2.33885		-0.5077	-2.33885				-0.4941	-2.28693		-0.4905	-2.33227		-0.4905	-2.34785		-0.4917	-2.32235				-0.4932	-2.24132		-0.4903	-2.31096		-0.4903	-2.32698		-0.4913	-2.29308				-0.4938	-2.24481		-0.4905	-2.28912		-0.4887
	-0.5068	-2.33724		-0.5068	-2.33724		-0.5068	-2.33724		-0.5068	-2.33724				-0.4933	-2.28308		-0.4896	-2.32781		-0.4897	-2.34294		-0.4909	-2.31794				-0.4924	-2.2377		-0.4895	-2.3068		-0.4895	-2.3223		-0.4905	-2.28893				-0.4929	-2.24169		-0.4896	-2.28517		-0.4879
	-0.506	-2.33555		-0.506	-2.33555		-0.506	-2.33555		-0.506	-2.33555				-0.4924	-2.27885		-0.4888	-2.32312		-0.4889	-2.3379		-0.49	-2.31329				-0.4915	-2.23455		-0.4887	-2.30277		-0.4887	-2.31758		-0.4896	-2.28497				-0.4921	-2.2383		-0.4888	-2.28125		-0.487
	-0.5052	-2.33367		-0.5052	-2.33367		-0.5052	-2.33367		-0.5052	-2.33367				-0.4916	-2.27499		-0.488	-2.31912		-0.488	-2.33329		-0.4892	-2.30913				-0.4907	-2.23114		-0.4878	-2.29895		-0.4879	-2.31319		-0.4888	-2.28109				-0.4913	-2.2353		-0.488	-2.27728		-0.4862
	-0.5043	-2.33199		-0.5043	-2.33199		-0.5043	-2.33199		-0.5043	-2.33199				-0.4908	-2.27092		-0.4871	-2.31444		-0.4872	-2.32855		-0.4884	-2.30463				-0.4899	-2.22805		-0.487	-2.29482		-0.487	-2.30839		-0.488	-2.27708				-0.4905	-2.23232		-0.4871	-2.27368		-0.4854
	-0.5035	-2.3305		-0.5035	-2.3305		-0.5035	-2.3305		-0.5035	-2.3305				-0.4899	-2.26696		-0.4863	-2.31025		-0.4864	-2.32376		-0.4875	-2.30032				-0.4891	-2.22483		-0.4862	-2.29065		-0.4862	-2.30382		-0.4872	-2.2731				-0.4896	-2.22907		-0.4863	-2.26978		-0.4845
	-0.5027	-2.32883		-0.5027	-2.32883		-0.5027	-2.32883		-0.5027	-2.32883				-0.4891	-2.26313		-0.4855	-2.30592		-0.4855	-2.31939		-0.4867	-2.29615				-0.4882	-2.22178		-0.4853	-2.28651		-0.4853	-2.29912		-0.4863	-2.26914				-0.4888	-2.22607		-0.4855	-2.26624		-0.4837
	-0.5019	-2.32707		-0.5019	-2.32707		-0.5019	-2.32707		-0.5019	-2.32707				-0.4883	-2.25916		-0.4846	-2.30164		-0.4847	-2.3148		-0.4859	-2.29187				-0.4874	-2.21875		-0.4845	-2.28258		-0.4845	-2.29431		-0.4855	-2.26521				-0.488	-2.22279		-0.4846	-2.26225		-0.4829
	-0.501	-2.32541		-0.501	-2.32541		-0.501	-2.32541		-0.501	-2.32541				-0.4874	-2.25555		-0.4838	-2.29757		-0.4839	-2.31042		-0.485	-2.28785				-0.4866	-2.2156		-0.4837	-2.27868		-0.4837	-2.29014		-0.4847	-2.26147				-0.4871	-2.2199		-0.4838	-2.25861		-0.4821
	-0.5002	-2.32404		-0.5002	-2.32404		-0.5002	-2.32404		-0.5002	-2.32404				-0.4866	-2.25189		-0.483	-2.2932		-0.4831	-2.30619		-0.4842	-2.28376				-0.4857	-2.21254		-0.4829	-2.27433		-0.4829	-2.28601		-0.4838	-2.25763				-0.4863	-2.21688		-0.483	-2.25508		-0.4812
	-0.4994	-2.32276		-0.4994	-2.32276		-0.4994	-2.32276		-0.4994	-2.32276				-0.4858	-2.24834		-0.4821	-2.28937		-0.4822	-2.30146		-0.4834	-2.27973				-0.4849	-2.20915		-0.482	-2.27051		-0.482	-2.28166		-0.483	-2.25378				-0.4855	-2.21396		-0.4822	-2.2515		-0.4804
	-0.4985	-2.3213		-0.4985	-2.3213		-0.4985	-2.3213		-0.4985	-2.3213				-0.4849	-2.24474		-0.4813	-2.28525		-0.4814	-2.29731		-0.4825	-2.27577				-0.4841	-2.206		-0.4812	-2.26656		-0.4812	-2.27794		-0.4822	-2.25017				-0.4846	-2.2112		-0.4813	-2.24826		-0.4796
	-0.4977	-2.31976		-0.4977	-2.31976		-0.4977	-2.31976		-0.4977	-2.31976				-0.4841	-2.24116		-0.4805	-2.28125		-0.4806	-2.29311		-0.4817	-2.27184				-0.4832	-2.20266		-0.4804	-2.26305		-0.4804	-2.27368		-0.4813	-2.24646				-0.4838	-2.2081		-0.4805	-2.24458		-0.4787
	-0.4969	-2.31831		-0.4969	-2.31831		-0.4969	-2.31831		-0.4969	-2.31831				-0.4833	-2.23785		-0.4797	-2.27728		-0.4797	-2.28845		-0.4809	-2.26786				-0.4824	-2.19976		-0.4795	-2.25908		-0.4796	-2.26946		-0.4805	-2.24277				-0.483	-2.20544		-0.4797	-2.24139		-0.4779
	-0.496	-2.31722		-0.496	-2.31722		-0.496	-2.31722		-0.496	-2.31722				-0.4825	-2.23426		-0.4788	-2.27311		-0.4789	-2.28458		-0.4801	-2.26398				-0.4816	-2.19675		-0.4787	-2.25532		-0.4787	-2.26552		-0.4797	-2.23919				-0.4821	-2.20266		-0.4788	-2.23815		-0.4771
	-0.4952	-2.31605		-0.4952	-2.31605		-0.4952	-2.31605		-0.4952	-2.31605				-0.4816	-2.23092		-0.478	-2.26946		-0.4781	-2.28034		-0.4792	-2.26024				-0.4808	-2.19362		-0.4779	-2.25181		-0.4779	-2.26138		-0.4789	-2.2356				-0.4813	-2.19997		-0.478	-2.23493		-0.4763
	-0.4944	-2.3148		-0.4944	-2.3148		-0.4944	-2.3148		-0.4944	-2.3148				-0.4808	-2.22717		-0.4772	-2.26568		-0.4773	-2.27597		-0.4784	-2.25627				-0.4799	-2.19084		-0.4771	-2.24811		-0.4771	-2.25751		-0.478	-2.23215				-0.4805	-2.19723		-0.4772	-2.23166		-0.4754
	-0.4936	-2.31363		-0.4936	-2.31363		-0.4936	-2.31363		-0.4936	-2.31363				-0.48	-2.22359		-0.4763	-2.26162		-0.4764	-2.27221		-0.4776	-2.25247				-0.4791	-2.18769		-0.4762	-2.24466		-0.4762	-2.25368		-0.4772	-2.22867				-0.4797	-2.19423		-0.4763	-2.22805		-0.4746
	-0.4927	-2.31274		-0.4927	-2.31274		-0.4927	-2.31274		-0.4927	-2.31274				-0.4791	-2.21997		-0.4755	-2.25751		-0.4756	-2.26825		-0.4767	-2.24858				-0.4783	-2.18509		-0.4754	-2.24086		-0.4754	-2.24949		-0.4764	-2.22515				-0.4788	-2.19152		-0.4755	-2.2249		-0.4738
	-0.4919	-2.31194		-0.4919	-2.31194		-0.4919	-2.31194		-0.4919	-2.31194				-0.4783	-2.21653		-0.4747	-2.25383		-0.4748	-2.2644		-0.4759	-2.24492				-0.4774	-2.18217		-0.4746	-2.2374		-0.4746	-2.24573		-0.4755	-2.22176				-0.478	-2.18883		-0.4747	-2.22149		-0.4729
	-0.4911	-2.31131		-0.4911	-2.31131		-0.4911	-2.31131		-0.4911	-2.31131				-0.4775	-2.21339		-0.4738	-2.25034		-0.4739	-2.26059		-0.4751	-2.24144				-0.4766	-2.17947		-0.4737	-2.23381		-0.4737	-2.24192		-0.4747	-2.2184				-0.4772	-2.18649		-0.4738	-2.21839		-0.4721
	-0.4903	-2.31051		-0.4903	-2.31051		-0.4903	-2.31051		-0.4903	-2.31051				-0.4767	-2.20993		-0.473	-2.24657		-0.4731	-2.25649		-0.4743	-2.23766				-0.4758	-2.17666		-0.4729	-2.23018		-0.4729	-2.238		-0.4739	-2.21494				-0.4763	-2.18376		-0.473	-2.21488		-0.4713
	-0.4894	-2.30989		-0.4894	-2.30989		-0.4894	-2.30989		-0.4894	-2.30989				-0.4758	-2.20684		-0.4722	-2.24321		-0.4723	-2.25282		-0.4734	-2.23429				-0.475	-2.17367		-0.4721	-2.22695		-0.4721	-2.23478		-0.4731	-2.2118				-0.4755	-2.18125		-0.4722	-2.21105		-0.4704
	-0.4886	-2.30954		-0.4886	-2.30954		-0.4886	-2.30954		-0.4886	-2.30954				-0.475	-2.2035		-0.4713	-2.23935		-0.4715	-2.24911		-0.4726	-2.23065				-0.4741	-2.17095		-0.4712	-2.22337		-0.4712	-2.23107		-0.4722	-2.20846				-0.4747	-2.17881		-0.4714	-2.20775		-0.4696
	-0.4877	-2.3091		-0.4877	-2.3091		-0.4877	-2.3091		-0.4877	-2.3091				-0.4742	-2.20052		-0.4705	-2.2359		-0.4706	-2.24527		-0.4718	-2.22723				-0.4733	-2.16813		-0.4704	-2.22004		-0.4704	-2.22731		-0.4714	-2.20516				-0.4738	-2.17613		-0.4705	-2.20447		-0.4688
	-0.4869	-2.30865		-0.4869	-2.30865		-0.4869	-2.30865		-0.4869	-2.30865				-0.4733	-2.1975		-0.4697	-2.23247		-0.4698	-2.24192		-0.4709	-2.22396				-0.4724	-2.16571		-0.4696	-2.21638		-0.4696	-2.22403		-0.4705	-2.20204				-0.473	-2.17393		-0.4697	-2.20169		-0.468
	-0.4861	-2.30812		-0.4861	-2.30812		-0.4861	-2.30812		-0.4861	-2.30812				-0.4725	-2.1943		-0.4689	-2.2293		-0.469	-2.23822		-0.4701	-2.2206				-0.4716	-2.16304		-0.4688	-2.21311		-0.4688	-2.22048		-0.4697	-2.19888				-0.4722	-2.17128		-0.4689	-2.19853		-0.4671
	-0.4853	-2.30795		-0.4853	-2.30795		-0.4853	-2.30795		-0.4853	-2.30795				-0.4717	-2.19132		-0.468	-2.22629		-0.4681	-2.23448		-0.4693	-2.21736				-0.4708	-2.16052		-0.4679	-2.20993		-0.4679	-2.21667		-0.4689	-2.19571				-0.4714	-2.16896		-0.4681	-2.19566		-0.4663
	-0.4844	-2.30795		-0.4844	-2.30795		-0.4844	-2.30795		-0.4844	-2.30795				-0.4708	-2.18796		-0.4672	-2.22286		-0.4673	-2.23121		-0.4684	-2.21401				-0.47	-2.15808		-0.4671	-2.20656		-0.4671	-2.21339		-0.4681	-2.19268				-0.4705	-2.1666		-0.4672	-2.19267		-0.4655
	-0.4836	-2.30786		-0.4836	-2.30786		-0.4836	-2.30786		-0.4836	-2.30786				-0.47	-2.18515		-0.4664	-2.21983		-0.4665	-2.2276		-0.4676	-2.21086				-0.4691	-2.15552		-0.4663	-2.20363		-0.4663	-2.20993		-0.4672	-2.18969				-0.4697	-2.16412		-0.4664	-2.18963		-0.4647
	-0.4828	-2.30786		-0.4828	-2.30786		-0.4828	-2.30786		-0.4828	-2.30786				-0.4692	-2.18217		-0.4655	-2.21624		-0.4656	-2.22417		-0.4668	-2.20753				-0.4683	-2.15323		-0.4654	-2.20045		-0.4654	-2.20663		-0.4664	-2.18677				-0.4689	-2.16197		-0.4656	-2.18669		-0.4638
	-0.4819	-2.30795		-0.4819	-2.30795		-0.4819	-2.30795		-0.4819	-2.30795				-0.4684	-2.17934		-0.4647	-2.21275		-0.4648	-2.22105		-0.466	-2.20438				-0.4675	-2.15058		-0.4646	-2.19736		-0.4646	-2.20343		-0.4656	-2.18379				-0.468	-2.15952		-0.4647	-2.18336		-0.463
	-0.4811	-2.3083		-0.4811	-2.3083		-0.4811	-2.3083		-0.4811	-2.3083				-0.4675	-2.17659		-0.4639	-2.20957		-0.464	-2.21738		-0.4651	-2.20118				-0.4666	-2.14825		-0.4638	-2.19389		-0.4638	-2.20004		-0.4647	-2.18073				-0.4672	-2.15752		-0.4639	-2.18059		-0.4622
	-0.4803	-2.30874		-0.4803	-2.30874		-0.4803	-2.30874		-0.4803	-2.30874				-0.4667	-2.17354		-0.4631	-2.20607		-0.4632	-2.21403		-0.4643	-2.19788				-0.4658	-2.14569		-0.463	-2.19071		-0.463	-2.19688		-0.4639	-2.17776				-0.4664	-2.15521		-0.4631	-2.1777		-0.4613
	-0.4794	-2.30901		-0.4794	-2.30901		-0.4794	-2.30901		-0.4794	-2.30901				-0.4659	-2.17095		-0.4622	-2.2028		-0.4623	-2.21056		-0.4635	-2.19477				-0.465	-2.14321		-0.4621	-2.18796		-0.4621	-2.19362		-0.4631	-2.17493				-0.4655	-2.15311		-0.4623	-2.17496		-0.4605
	-0.4786	-2.30927		-0.4786	-2.30927		-0.4786	-2.30927		-0.4786	-2.30927				-0.4651	-2.16813		-0.4614	-2.19935		-0.4615	-2.20712		-0.4627	-2.19153				-0.4642	-2.14086		-0.4613	-2.18495		-0.4613	-2.19024		-0.4623	-2.17202				-0.4647	-2.15101		-0.4614	-2.17211		-0.4596
	-0.4778	-2.30972		-0.4778	-2.30972		-0.4778	-2.30972		-0.4778	-2.30972				-0.4642	-2.16545		-0.4606	-2.19634		-0.4607	-2.20426		-0.4618	-2.18868				-0.4633	-2.13835		-0.4604	-2.18224		-0.4604	-2.18742		-0.4614	-2.16933				-0.4639	-2.14868		-0.4606	-2.16896		-0.4588
	-0.477	-2.31025		-0.477	-2.31025		-0.477	-2.31025		-0.477	-2.31025				-0.4634	-2.1626		-0.4597	-2.19301		-0.4598	-2.20107		-0.461	-2.18556				-0.4625	-2.1362		-0.4596	-2.17914		-0.4596	-2.18436		-0.4606	-2.16657				-0.4631	-2.14667		-0.4597	-2.16615		-0.458
	-0.4761	-2.31087		-0.4761	-2.31087		-0.4761	-2.31087		-0.4761	-2.31087				-0.4626	-2.15971		-0.4589	-2.1901		-0.459	-2.19777		-0.4602	-2.18253				-0.4617	-2.13377		-0.4588	-2.17607		-0.4588	-2.18111		-0.4598	-2.16365				-0.4622	-2.14436		-0.4589	-2.16279		-0.4572
	-0.4753	-2.31114		-0.4753	-2.31114		-0.4753	-2.31114		-0.4753	-2.31114				-0.4617	-2.15695		-0.4581	-2.18715		-0.4582	-2.19498		-0.4593	-2.17969				-0.4608	-2.13177		-0.458	-2.17321		-0.458	-2.17849		-0.4589	-2.16116				-0.4614	-2.14243		-0.4581	-2.16021		-0.4563
	-0.4745	-2.31158		-0.4745	-2.31158		-0.4745	-2.31158		-0.4745	-2.31158				-0.4609	-2.15391		-0.4572	-2.18422		-0.4573	-2.19186		-0.4585	-2.17666				-0.46	-2.12936		-0.4571	-2.17005		-0.4571	-2.17535		-0.4581	-2.15826				-0.4606	-2.14038		-0.4572	-2.15764		-0.4555
	-0.4736	-2.31229		-0.4736	-2.31229		-0.4736	-2.31229		-0.4736	-2.31229				-0.46	-2.15138		-0.4564	-2.18151		-0.4565	-2.18863		-0.4576	-2.17384				-0.4592	-2.1272		-0.4563	-2.16698		-0.4563	-2.17231		-0.4573	-2.1555				-0.4597	-2.13823		-0.4564	-2.15509		-0.4547
	-0.4728	-2.31292		-0.4728	-2.31292		-0.4728	-2.31292		-0.4728	-2.31292				-0.4592	-2.1485		-0.4556	-2.17842		-0.4557	-2.18569		-0.4568	-2.17087				-0.4583	-2.12523		-0.4555	-2.16336		-0.4555	-2.16935		-0.4564	-2.15265				-0.4589	-2.1365		-0.4556	-2.15267		-0.4538
	-0.472	-2.31354		-0.472	-2.31354		-0.472	-2.31354		-0.472	-2.31354				-0.4584	-2.14606		-0.4547	-2.17548		-0.4549	-2.18243		-0.456	-2.16799				-0.4575	-2.12303		-0.4546	-2.16021		-0.4546	-2.1659		-0.4556	-2.14971				-0.4581	-2.13436		-0.4548	-2.14991		-0.453
	-0.4712	-2.3139		-0.4712	-2.3139		-0.4712	-2.3139		-0.4712	-2.3139				-0.4576	-2.14339		-0.4539	-2.17224		-0.454	-2.17947		-0.4552	-2.16504				-0.4567	-2.12113		-0.4538	-2.15695		-0.4538	-2.16304		-0.4548	-2.14704				-0.4572	-2.13265		-0.4539	-2.14722		-0.4522
	-0.4703	-2.31453		-0.4703	-2.31453		-0.4703	-2.31453		-0.4703	-2.31453				-0.4567	-2.14086		-0.4531	-2.16935		-0.4532	-2.17646		-0.4543	-2.16222				-0.4558	-2.11879		-0.453	-2.15428		-0.453	-2.16015		-0.4539	-2.1444				-0.4564	-2.13077		-0.4531	-2.14424		-0.4514
	-0.4695	-2.31524		-0.4695	-2.31524		-0.4695	-2.31524		-0.4695	-2.31524				-0.4559	-2.13859		-0.4523	-2.16647		-0.4524	-2.17315		-0.4535	-2.1594				-0.455	-2.11679		-0.4521	-2.15163		-0.4521	-2.15708		-0.4531	-2.14183				-0.4556	-2.12919		-0.4523	-2.14152		-0.4505
	-0.4687	-2.31578		-0.4687	-2.31578		-0.4687	-2.31578		-0.4687	-2.31578				-0.4551	-2.13602		-0.4514	-2.16355		-0.4515	-2.17037		-0.4527	-2.15665				-0.4542	-2.11475		-0.4513	-2.14893		-0.4513	-2.15447		-0.4523	-2.13938				-0.4548	-2.12726		-0.4515	-2.13876		-0.4497
	-0.4678	-2.31623		-0.4678	-2.31623		-0.4678	-2.31623		-0.4678	-2.31623				-0.4543	-2.13371		-0.4506	-2.16115		-0.4507	-2.16749		-0.4519	-2.15412				-0.4534	-2.11278		-0.4505	-2.14642		-0.4505	-2.15144		-0.4515	-2.13688				-0.4539	-2.12529		-0.4506	-2.13614		-0.4489
	-0.467	-2.3165		-0.467	-2.3165		-0.467	-2.3165		-0.467	-2.3165				-0.4534	-2.131		-0.4498	-2.1582		-0.4499	-2.1645		-0.451	-2.15124				-0.4525	-2.11098		-0.4497	-2.14333		-0.4497	-2.14819		-0.4506	-2.13417				-0.4531	-2.12349		-0.4498	-2.13371		-0.448
	-0.4662	-2.31695		-0.4662	-2.31695		-0.4662	-2.31695		-0.4662	-2.31695				-0.4526	-2.12854		-0.449	-2.15521		-0.4491	-2.16203		-0.4502	-2.1486				-0.4517	-2.10891		-0.4489	-2.14086		-0.4488	-2.14569		-0.4498	-2.13182				-0.4523	-2.12142		-0.449	-2.13112		-0.4472
	-0.4653	-2.31731		-0.4653	-2.31731		-0.4653	-2.31731		-0.4653	-2.31731				-0.4518	-2.1261		-0.4481	-2.15218		-0.4482	-2.15927		-0.4494	-2.14585				-0.4509	-2.1074		-0.448	-2.13829		-0.448	-2.14279		-0.449	-2.12949				-0.4514	-2.1197		-0.4481	-2.12889		-0.4464
	-0.4645	-2.3174		-0.4645	-2.3174		-0.4645	-2.3174		-0.4645	-2.3174				-0.4509	-2.12355		-0.4473	-2.14923		-0.4474	-2.15639		-0.4485	-2.14306				-0.4501	-2.10535		-0.4472	-2.13579		-0.4472	-2.13978		-0.4482	-2.12697				-0.4506	-2.11776		-0.4473	-2.12639		-0.4455
	-0.4637	-2.31713		-0.4637	-2.31713		-0.4637	-2.31713		-0.4637	-2.31713				-0.4501	-2.12148		-0.4464	-2.14685		-0.4465	-2.1536		-0.4477	-2.14064				-0.4492	-2.10342		-0.4463	-2.13342		-0.4463	-2.13733		-0.4473	-2.12472				-0.4498	-2.11611		-0.4464	-2.12378		-0.4447
	-0.4629	-2.31704		-0.4629	-2.31704		-0.4629	-2.31704		-0.4629	-2.31704				-0.4493	-2.11896		-0.4456	-2.14418		-0.4457	-2.15052		-0.4469	-2.13789				-0.4484	-2.10144		-0.4455	-2.13071		-0.4455	-2.13436		-0.4465	-2.12217				-0.449	-2.11441		-0.4456	-2.12136		-0.4439
	-0.462	-2.31695		-0.462	-2.31695		-0.462	-2.31695		-0.462	-2.31695				-0.4485	-2.11679		-0.4448	-2.1417		-0.4449	-2.14783		-0.4461	-2.13544				-0.4475	-2.09947		-0.4447	-2.12854		-0.4447	-2.13153		-0.4456	-2.11985				-0.4481	-2.11266		-0.4448	-2.11867		-0.443
	-0.4612	-2.31677		-0.4612	-2.31677		-0.4612	-2.31677		-0.4612	-2.31677				-0.4476	-2.11436		-0.4439	-2.1387		-0.4441	-2.14533		-0.4452	-2.1328				-0.4467	-2.09773		-0.4438	-2.12598		-0.4438	-2.12907		-0.4448	-2.11759				-0.4473	-2.11137		-0.444	-2.11628		-0.4422
	-0.4604	-2.31641		-0.4604	-2.31641		-0.4604	-2.31641		-0.4604	-2.31641				-0.4468	-2.11182		-0.4431	-2.13608		-0.4432	-2.14243		-0.4444	-2.13011				-0.4459	-2.09577		-0.443	-2.12367		-0.443	-2.12639		-0.444	-2.11528				-0.4464	-2.10963		-0.4431	-2.11357		-0.4414
	-0.4595	-2.31587		-0.4595	-2.31587		-0.4595	-2.31587		-0.4595	-2.31587				-0.446	-2.10958		-0.4423	-2.13342		-0.4424	-2.1399		-0.4436	-2.12763				-0.4451	-2.09426		-0.4422	-2.12113		-0.4422	-2.12384		-0.4432	-2.11308				-0.4456	-2.10813		-0.4423	-2.11137		-0.4406
	-0.4587	-2.3156		-0.4587	-2.3156		-0.4587	-2.3156		-0.4587	-2.3156				-0.4451	-2.10707		-0.4415	-2.13047		-0.4416	-2.13709		-0.4427	-2.12488				-0.4442	-2.09243		-0.4414	-2.1185		-0.4414	-2.12136		-0.4423	-2.11076				-0.4448	-2.10635		-0.4415	-2.10902		-0.4397
	-0.4579	-2.31524		-0.4579	-2.31524		-0.4579	-2.31524		-0.4579	-2.31524				-0.4443	-2.10502		-0.4406	-2.12814		-0.4407	-2.13401		-0.4419	-2.12239				-0.4434	-2.09087		-0.4405	-2.11611		-0.4405	-2.11844		-0.4415	-2.10848				-0.444	-2.10458		-0.4407	-2.10663		-0.4389
	-0.457	-2.31471		-0.457	-2.31471		-0.457	-2.31471		-0.457	-2.31471				-0.4435	-2.10265		-0.4398	-2.1254		-0.4399	-2.13159		-0.4411	-2.11988				-0.4426	-2.08906		-0.4397	-2.11289		-0.4397	-2.11623		-0.4407	-2.10606				-0.4431	-2.10303		-0.4398	-2.10419		-0.4381
	-0.4562	-2.31408		-0.4562	-2.31408		-0.4562	-2.31408		-0.4562	-2.31408				-0.4426	-2.10051		-0.439	-2.12292		-0.4391	-2.12901		-0.4402	-2.11748				-0.4417	-2.0873		-0.4389	-2.11036		-0.4389	-2.11368		-0.4398	-2.10378				-0.4423	-2.10111		-0.439	-2.1016		-0.4372
[truncated: 32 more columns]

## Sheet: EPS
Blank	-0.956	-3.18006	batch 1	-0.954	-3.18006	batch 2	-0.956	-3.17776	batch 3	-0.9553	-3.17929	avg		200ppm	-0.9303	-2.59739	batch 1	-0.9303	-2.60739	batch 2	-0.9303	-2.59619	batch 3	-0.9303	-2.60033	avg		400ppm	-0.9373	-2.60206	batch 1	-0.9373	-2.61206	batch 2	-0.9373	-2.61206	batch 3	-0.9373	-2.60873	avg		600ppm	-0.9426	-2.57774	batch 1	-0.9426	-2.58774	batch 2	-0.9426
	-0.955	-3.23882		-0.953	-3.23882		-0.955	-3.23652		-0.9543	-3.23806				-0.9293	-2.6515		-0.9293	-2.6615		-0.9293	-2.65014		-0.9293	-2.65438				-0.9362	-2.65306		-0.9362	-2.66306		-0.9362	-2.66306		-0.9362	-2.65973				-0.9415	-2.62727		-0.9415	-2.63727		-0.9415
	-0.9542	-3.27934		-0.9522	-3.27934		-0.9542	-3.27704		-0.9535	-3.27858				-0.9284	-2.68487		-0.9284	-2.69487		-0.9284	-2.6834		-0.9284	-2.68771				-0.9353	-2.68592		-0.9353	-2.69592		-0.9353	-2.69592		-0.9353	-2.69259				-0.9407	-2.65857		-0.9407	-2.66857		-0.9407
	-0.9534	-3.3106		-0.9514	-3.3106		-0.9534	-3.3083		-0.9527	-3.30984				-0.9276	-2.70575		-0.9276	-2.71575		-0.9276	-2.70421		-0.9276	-2.70857				-0.9345	-2.70774		-0.9345	-2.71774		-0.9345	-2.71774		-0.9345	-2.71441				-0.9399	-2.67985		-0.9399	-2.68985		-0.9399
	-0.9525	-3.33592		-0.9505	-3.33592		-0.9525	-3.33362		-0.9518	-3.33516				-0.9268	-2.72079		-0.9268	-2.73079		-0.9268	-2.71919		-0.9268	-2.72359				-0.9337	-2.72331		-0.9337	-2.73331		-0.9337	-2.73331		-0.9337	-2.72998				-0.9391	-2.69486		-0.9391	-2.70486		-0.9391
	-0.9517	-3.35724		-0.9497	-3.35724		-0.9517	-3.35494		-0.951	-3.35647				-0.9259	-2.73236		-0.9259	-2.74236		-0.9259	-2.73072		-0.9259	-2.73515				-0.9328	-2.73471		-0.9328	-2.74471		-0.9328	-2.74471		-0.9328	-2.74138				-0.9382	-2.70642		-0.9382	-2.71642		-0.9382
	-0.9509	-3.37613		-0.9489	-3.37613		-0.9509	-3.37383		-0.9502	-3.37536				-0.9251	-2.74184		-0.9251	-2.75184		-0.9251	-2.74017		-0.9251	-2.74462				-0.932	-2.744		-0.932	-2.754		-0.932	-2.754		-0.932	-2.75067				-0.9374	-2.71579		-0.9374	-2.72579		-0.9374
	-0.9501	-3.39319		-0.9481	-3.39319		-0.9501	-3.39089		-0.9494	-3.39242				-0.9243	-2.75007		-0.9243	-2.76007		-0.9243	-2.74836		-0.9243	-2.75283				-0.9312	-2.75154		-0.9312	-2.76154		-0.9312	-2.76154		-0.9312	-2.7582				-0.9366	-2.72354		-0.9366	-2.73354		-0.9366
	-0.9492	-3.40838		-0.9472	-3.40838		-0.9492	-3.40608		-0.9485	-3.40761				-0.9234	-2.75721		-0.9234	-2.76721		-0.9234	-2.75548		-0.9234	-2.75997				-0.9304	-2.75796		-0.9304	-2.76796		-0.9304	-2.76796		-0.9304	-2.76462				-0.9357	-2.73072		-0.9357	-2.74072		-0.9357
	-0.9484	-3.42251		-0.9464	-3.42251		-0.9484	-3.42021		-0.9477	-3.42174				-0.9226	-2.76422		-0.9226	-2.77422		-0.9226	-2.76246		-0.9226	-2.76696				-0.9295	-2.76371		-0.9295	-2.77371		-0.9295	-2.77371		-0.9295	-2.77038				-0.9349	-2.73755		-0.9349	-2.74755		-0.9349
	-0.9475	-3.43427		-0.9455	-3.43427		-0.9475	-3.43197		-0.9468	-3.4335				-0.9218	-2.77083		-0.9218	-2.78083		-0.9218	-2.76904		-0.9218	-2.77357				-0.9287	-2.76904		-0.9287	-2.77904		-0.9287	-2.77904		-0.9287	-2.77571				-0.9341	-2.744		-0.9341	-2.754		-0.9341
	-0.9467	-3.44394		-0.9447	-3.44394		-0.9467	-3.44164		-0.946	-3.44317				-0.9209	-2.7778		-0.9209	-2.7878		-0.9209	-2.77599		-0.9209	-2.78053				-0.9279	-2.77443		-0.9279	-2.78443		-0.9279	-2.78443		-0.9279	-2.7811				-0.9332	-2.75031		-0.9332	-2.76031		-0.9332
	-0.9459	-3.45198		-0.9439	-3.45198		-0.9459	-3.44968		-0.9452	-3.45121				-0.9201	-2.78463		-0.9201	-2.79463		-0.9201	-2.78278		-0.9201	-2.78734				-0.927	-2.77989		-0.927	-2.78989		-0.927	-2.78989		-0.927	-2.78656				-0.9324	-2.75647		-0.9324	-2.76647		-0.9324
	-0.9451	-3.4608		-0.9431	-3.4608		-0.9451	-3.4585		-0.9444	-3.46003				-0.9193	-2.79156		-0.9193	-2.80156		-0.9193	-2.78968		-0.9193	-2.79427				-0.9262	-2.78542		-0.9262	-2.79542		-0.9262	-2.79542		-0.9262	-2.79209				-0.9316	-2.76271		-0.9316	-2.77271		-0.9316
	-0.9442	-3.47134		-0.9422	-3.47134		-0.9442	-3.46904		-0.9435	-3.47057				-0.9184	-2.7986		-0.9184	-2.8086		-0.9184	-2.7967		-0.9184	-2.8013				-0.9254	-2.79075		-0.9254	-2.80075		-0.9254	-2.80075		-0.9254	-2.79742				-0.9308	-2.76904		-0.9308	-2.77904		-0.9308
	-0.9434	-3.48294		-0.9414	-3.48294		-0.9434	-3.48064		-0.9427	-3.48217				-0.9176	-2.80576		-0.9176	-2.81576		-0.9176	-2.80382		-0.9176	-2.80845				-0.9246	-2.79642		-0.9246	-2.80642		-0.9246	-2.80642		-0.9246	-2.80309				-0.9299	-2.77547		-0.9299	-2.78547		-0.9299
	-0.9426	-3.49499		-0.9406	-3.49499		-0.9426	-3.49269		-0.9419	-3.49422				-0.9168	-2.81333		-0.9168	-2.82333		-0.9168	-2.81135		-0.9168	-2.816				-0.9237	-2.80189		-0.9237	-2.81189		-0.9237	-2.81189		-0.9237	-2.80856				-0.9291	-2.78199		-0.9291	-2.79199		-0.9291
	-0.9418	-3.50696		-0.9398	-3.50696		-0.9418	-3.50466		-0.9411	-3.50619				-0.9159	-2.82131		-0.9159	-2.83131		-0.9159	-2.8193		-0.9159	-2.82397				-0.9229	-2.80799		-0.9229	-2.81799		-0.9229	-2.81799		-0.9229	-2.81466				-0.9283	-2.78861		-0.9283	-2.79861		-0.9283
	-0.9409	-3.51827		-0.9389	-3.51827		-0.9409	-3.51597		-0.9402	-3.5175				-0.9151	-2.82915		-0.9151	-2.83915		-0.9151	-2.82711		-0.9151	-2.8318				-0.922	-2.81417		-0.922	-2.82417		-0.922	-2.82417		-0.922	-2.82084				-0.9275	-2.79507		-0.9275	-2.80507		-0.9275
	-0.9401	-3.52915		-0.9381	-3.52915		-0.9401	-3.52685		-0.9394	-3.52838				-0.9143	-2.83744		-0.9143	-2.84744		-0.9143	-2.83535		-0.9143	-2.84007				-0.9212	-2.82045		-0.9212	-2.83045		-0.9212	-2.83045		-0.9212	-2.82711				-0.9266	-2.80189		-0.9266	-2.81189		-0.9266
	-0.9393	-3.5394		-0.9373	-3.5394		-0.9393	-3.5371		-0.9386	-3.53864				-0.9135	-2.84558		-0.9135	-2.85558		-0.9135	-2.84345		-0.9135	-2.8482				-0.9204	-2.82681		-0.9204	-2.83681		-0.9204	-2.83681		-0.9204	-2.83348				-0.9258	-2.80883		-0.9258	-2.81883		-0.9258
	-0.9384	-3.5496		-0.9364	-3.5496		-0.9384	-3.5473		-0.9377	-3.54883				-0.9126	-2.85387		-0.9126	-2.86387		-0.9126	-2.85171		-0.9126	-2.85648				-0.9196	-2.83327		-0.9196	-2.84327		-0.9196	-2.84327		-0.9196	-2.83994				-0.9249	-2.81588		-0.9249	-2.82588		-0.9249
	-0.9376	-3.55941		-0.9356	-3.55941		-0.9376	-3.55711		-0.9369	-3.55864				-0.9118	-2.86296		-0.9118	-2.87296		-0.9118	-2.86075		-0.9118	-2.86556				-0.9187	-2.83983		-0.9187	-2.84983		-0.9187	-2.84983		-0.9187	-2.8465				-0.9241	-2.82275		-0.9241	-2.83275		-0.9241
	-0.9368	-3.56848		-0.9348	-3.56848		-0.9368	-3.56618		-0.9361	-3.56771				-0.911	-2.87192		-0.911	-2.88192		-0.911	-2.86967		-0.911	-2.8745				-0.9179	-2.8468		-0.9179	-2.8568		-0.9179	-2.8568		-0.9179	-2.85346				-0.9233	-2.82974		-0.9233	-2.83974		-0.9233
	-0.9359	-3.57774		-0.9339	-3.57774		-0.9359	-3.57544		-0.9352	-3.57697				-0.9102	-2.88074		-0.9102	-2.89074		-0.9102	-2.87844		-0.9102	-2.88331				-0.9171	-2.85387		-0.9171	-2.86387		-0.9171	-2.86387		-0.9171	-2.86054				-0.9224	-2.83684		-0.9224	-2.84684		-0.9224
	-0.9351	-3.5867		-0.9331	-3.5867		-0.9351	-3.5844		-0.9344	-3.58593				-0.9093	-2.89008		-0.9093	-2.90008		-0.9093	-2.88773		-0.9093	-2.89263				-0.9162	-2.86107		-0.9162	-2.87107		-0.9162	-2.87107		-0.9162	-2.86773				-0.9216	-2.84375		-0.9216	-2.85375		-0.9216
	-0.9343	-3.59551		-0.9323	-3.59551		-0.9343	-3.59321		-0.9336	-3.59474				-0.9085	-2.89928		-0.9085	-2.90928		-0.9085	-2.89688		-0.9085	-2.90182				-0.9154	-2.86838		-0.9154	-2.87838		-0.9154	-2.87838		-0.9154	-2.87505				-0.9208	-2.8514		-0.9208	-2.8614		-0.9208
	-0.9334	-3.60398		-0.9314	-3.60398		-0.9334	-3.60168		-0.9327	-3.60321				-0.9076	-2.90868		-0.9076	-2.91868		-0.9076	-2.90623		-0.9076	-2.9112				-0.9146	-2.8755		-0.9146	-2.8855		-0.9146	-2.8855		-0.9146	-2.88216				-0.9199	-2.85855		-0.9199	-2.86855		-0.9199
	-0.9326	-3.6119		-0.9306	-3.6119		-0.9326	-3.6096		-0.9319	-3.61113				-0.9068	-2.91829		-0.9068	-2.92829		-0.9068	-2.91578		-0.9068	-2.92079				-0.9137	-2.88273		-0.9137	-2.89273		-0.9137	-2.89273		-0.9137	-2.8894				-0.9191	-2.86582		-0.9191	-2.87582		-0.9191
	-0.9318	-3.61997		-0.9298	-3.61997		-0.9318	-3.61767		-0.9311	-3.6192				-0.906	-2.92775		-0.906	-2.93775		-0.906	-2.92518		-0.906	-2.93023				-0.9129	-2.89076		-0.9129	-2.90076		-0.9129	-2.90076		-0.9129	-2.89743				-0.9183	-2.87322		-0.9183	-2.88322		-0.9183
	-0.9309	-3.62819		-0.9289	-3.62819		-0.9309	-3.62589		-0.9302	-3.62743				-0.9052	-2.93779		-0.9052	-2.94779		-0.9052	-2.93517		-0.9052	-2.94025				-0.9121	-2.89825		-0.9121	-2.90825		-0.9121	-2.90825		-0.9121	-2.90492				-0.9175	-2.88074		-0.9175	-2.89074		-0.9175
	-0.9301	-3.63658		-0.9281	-3.63658		-0.9301	-3.63428		-0.9294	-3.63581				-0.9043	-2.94731		-0.9043	-2.95731		-0.9043	-2.94462		-0.9043	-2.94974				-0.9113	-2.90588		-0.9113	-2.91588		-0.9113	-2.91588		-0.9113	-2.91255				-0.9166	-2.8884		-0.9166	-2.8984		-0.9166
	-0.9293	-3.64474		-0.9273	-3.64474		-0.9293	-3.64244		-0.9286	-3.64397				-0.9035	-2.95703		-0.9035	-2.96703		-0.9035	-2.95429		-0.9035	-2.95945				-0.9104	-2.91364		-0.9104	-2.92364		-0.9104	-2.92364		-0.9104	-2.92031				-0.9158	-2.89585		-0.9158	-2.90585		-0.9158
	-0.9285	-3.65189		-0.9265	-3.65189		-0.9285	-3.64959		-0.9278	-3.65112				-0.9027	-2.96738		-0.9027	-2.97738		-0.9027	-2.96457		-0.9027	-2.96978				-0.9096	-2.92154		-0.9096	-2.93154		-0.9096	-2.93154		-0.9096	-2.92821				-0.915	-2.90379		-0.915	-2.91379		-0.915
	-0.9277	-3.65936		-0.9257	-3.65936		-0.9277	-3.65706		-0.927	-3.65859				-0.9019	-2.97757		-0.9019	-2.98757		-0.9019	-2.97469		-0.9019	-2.97995				-0.9088	-2.92959		-0.9088	-2.93959		-0.9088	-2.93959		-0.9088	-2.93626				-0.9141	-2.91151		-0.9141	-2.92151		-0.9141
	-0.9268	-3.66675		-0.9248	-3.66675		-0.9268	-3.66445		-0.9261	-3.66599				-0.901	-2.98758		-0.901	-2.99758		-0.901	-2.98464		-0.901	-2.98994				-0.9079	-2.93817		-0.9079	-2.94817		-0.9079	-2.94817		-0.9079	-2.94484				-0.9133	-2.91937		-0.9133	-2.92937		-0.9133
	-0.926	-3.67325		-0.924	-3.67325		-0.926	-3.67095		-0.9253	-3.67249				-0.9002	-2.99783		-0.9002	-3.00783		-0.9002	-2.99482		-0.9002	-3.00016				-0.9071	-2.94615		-0.9071	-2.95615		-0.9071	-2.95615		-0.9071	-2.95282				-0.9125	-2.92702		-0.9125	-2.93702		-0.9125
	-0.9252	-3.67985		-0.9232	-3.67985		-0.9252	-3.67755		-0.9245	-3.67909				-0.8994	-3.00802		-0.8994	-3.01802		-0.8994	-3.00494		-0.8994	-3.01033				-0.9063	-2.95468		-0.9063	-2.96468		-0.9063	-2.96468		-0.9063	-2.96134				-0.9117	-2.93517		-0.9117	-2.94517		-0.9117
	-0.9243	-3.68655		-0.9223	-3.68655		-0.9243	-3.68425		-0.9236	-3.68579				-0.8985	-3.01845		-0.8985	-3.02845		-0.8985	-3.01529		-0.8985	-3.02073				-0.9054	-2.96297		-0.9054	-2.97297		-0.9054	-2.97297		-0.9054	-2.96964				-0.9108	-2.9431		-0.9108	-2.9531		-0.9108
	-0.9235	-3.69357		-0.9215	-3.69357		-0.9235	-3.69127		-0.9228	-3.69281				-0.8977	-3.02886		-0.8977	-3.03886		-0.8977	-3.02563		-0.8977	-3.03112				-0.9046	-2.97102		-0.9046	-2.98102		-0.9046	-2.98102		-0.9046	-2.97769				-0.91	-2.95156		-0.91	-2.96156		-0.91
	-0.9227	-3.70071		-0.9207	-3.70071		-0.9227	-3.69841		-0.922	-3.69994				-0.8968	-3.03953		-0.8968	-3.04953		-0.8968	-3.03621		-0.8968	-3.04176				-0.9038	-2.98005		-0.9038	-2.99005		-0.9038	-2.99005		-0.9038	-2.98672				-0.9092	-2.95979		-0.9092	-2.96979		-0.9092
	-0.9218	-3.70774		-0.9198	-3.70774		-0.9218	-3.70544		-0.9211	-3.70698				-0.896	-3.05017		-0.896	-3.06017		-0.896	-3.04677		-0.896	-3.05237				-0.9029	-2.98885		-0.9029	-2.99885		-0.9029	-2.99885		-0.9029	-2.99552				-0.9083	-2.96778		-0.9083	-2.97778		-0.9083
	-0.921	-3.71489		-0.919	-3.71489		-0.921	-3.71259		-0.9203	-3.71413				-0.8952	-3.06063		-0.8952	-3.07063		-0.8952	-3.05715		-0.8952	-3.0628				-0.9021	-2.9974		-0.9021	-3.0074		-0.9021	-3.0074		-0.9021	-3.00407				-0.9075	-2.97634		-0.9075	-2.98634		-0.9075
	-0.9201	-3.72193		-0.9181	-3.72193		-0.9201	-3.71963		-0.9194	-3.72117				-0.8944	-3.0714		-0.8944	-3.0814		-0.8944	-3.06783		-0.8944	-3.07354				-0.9013	-3.00634		-0.9013	-3.01634		-0.9013	-3.01634		-0.9013	-3.01301				-0.9067	-2.98464		-0.9067	-2.99464		-0.9067
	-0.9193	-3.72862		-0.9173	-3.72862		-0.9193	-3.72632		-0.9186	-3.72786				-0.8935	-3.08202		-0.8935	-3.09202		-0.8935	-3.07837		-0.8935	-3.08414				-0.9005	-3.01502		-0.9005	-3.02502		-0.9005	-3.02502		-0.9005	-3.02169				-0.9058	-2.99311		-0.9058	-3.00311		-0.9058
	-0.9185	-3.73495		-0.9165	-3.73495		-0.9185	-3.73265		-0.9178	-3.73418				-0.8927	-3.09291		-0.8927	-3.10291		-0.8927	-3.08916		-0.8927	-3.09499				-0.8996	-3.02415		-0.8996	-3.03415		-0.8996	-3.03415		-0.8996	-3.03082				-0.905	-3.00174		-0.905	-3.01174		-0.905
	-0.9177	-3.74065		-0.9157	-3.74065		-0.9177	-3.73835		-0.917	-3.73988				-0.8919	-3.1038		-0.8919	-3.1138		-0.8919	-3.09996		-0.8919	-3.10586				-0.8988	-3.03325		-0.8988	-3.04325		-0.8988	-3.04325		-0.8988	-3.03992				-0.9042	-3.01042		-0.9042	-3.02042		-0.9042
	-0.9168	-3.74642		-0.9148	-3.74642		-0.9168	-3.74412		-0.9161	-3.74565				-0.8911	-3.11475		-0.8911	-3.12475		-0.8911	-3.11081		-0.8911	-3.11677				-0.898	-3.04244		-0.898	-3.05244		-0.898	-3.05244		-0.898	-3.04911				-0.9034	-3.01904		-0.9034	-3.02904		-0.9034
	-0.916	-3.75252		-0.914	-3.75252		-0.916	-3.75022		-0.9153	-3.75175				-0.8902	-3.12569		-0.8902	-3.13569		-0.8902	-3.12165		-0.8902	-3.12768				-0.8971	-3.05203		-0.8971	-3.06203		-0.8971	-3.06203		-0.8971	-3.05869				-0.9025	-3.02789		-0.9025	-3.03789		-0.9025
	-0.9152	-3.75845		-0.9132	-3.75845		-0.9152	-3.75615		-0.9145	-3.75769				-0.8894	-3.13656		-0.8894	-3.14656		-0.8894	-3.13241		-0.8894	-3.13851				-0.8963	-3.06113		-0.8963	-3.07113		-0.8963	-3.07113		-0.8963	-3.0678				-0.9017	-3.03687		-0.9017	-3.04687		-0.9017
	-0.9144	-3.76422		-0.9124	-3.76422		-0.9144	-3.76192		-0.9137	-3.76345				-0.8886	-3.14783		-0.8886	-3.15783		-0.8886	-3.14357		-0.8886	-3.14974				-0.8955	-3.07043		-0.8955	-3.08043		-0.8955	-3.08043		-0.8955	-3.07709				-0.9009	-3.0459		-0.9009	-3.0559		-0.9009
	-0.9135	-3.76981		-0.9115	-3.76981		-0.9135	-3.76751		-0.9128	-3.76904				-0.8877	-3.15883		-0.8877	-3.16883		-0.8877	-3.15447		-0.8877	-3.16071				-0.8946	-3.07993		-0.8946	-3.08993		-0.8946	-3.08993		-0.8946	-3.0866				-0.9	-3.05507		-0.9	-3.06507		-0.9
	-0.9127	-3.77521		-0.9107	-3.77521		-0.9127	-3.77291		-0.912	-3.77444				-0.8869	-3.17005		-0.8869	-3.18005		-0.8869	-3.16558		-0.8869	-3.1719				-0.8938	-3.08959		-0.8938	-3.09959		-0.8938	-3.09959		-0.8938	-3.09626				-0.8992	-3.06434		-0.8992	-3.07434		-0.8992
	-0.9119	-3.78094		-0.9099	-3.78094		-0.9119	-3.77864		-0.9112	-3.78017				-0.8861	-3.18138		-0.8861	-3.19138		-0.8861	-3.17679		-0.8861	-3.18318				-0.893	-3.09941		-0.893	-3.10941		-0.893	-3.10941		-0.893	-3.10608				-0.8984	-3.07345		-0.8984	-3.08345		-0.8984
	-0.911	-3.78675		-0.909	-3.78675		-0.911	-3.78445		-0.9103	-3.78598				-0.8853	-3.19246		-0.8853	-3.20246		-0.8853	-3.18776		-0.8853	-3.19423				-0.8922	-3.10924		-0.8922	-3.11924		-0.8922	-3.11924		-0.8922	-3.11591				-0.8976	-3.08276		-0.8976	-3.09276		-0.8976
	-0.9102	-3.79237		-0.9082	-3.79237		-0.9102	-3.79007		-0.9095	-3.7916				-0.8844	-3.20363		-0.8844	-3.21363		-0.8844	-3.1988		-0.8844	-3.20536				-0.8913	-3.11919		-0.8913	-3.12919		-0.8913	-3.12919		-0.8913	-3.12585				-0.8967	-3.09237		-0.8967	-3.10237		-0.8967
	-0.9094	-3.79806		-0.9074	-3.79806		-0.9094	-3.79576		-0.9087	-3.79729				-0.8836	-3.2151		-0.8836	-3.2251		-0.8836	-3.21014		-0.8836	-3.21678				-0.8905	-3.12889		-0.8905	-3.13889		-0.8905	-3.13889		-0.8905	-3.13556				-0.8959	-3.10199		-0.8959	-3.11199		-0.8959
	-0.9085	-3.80272		-0.9065	-3.80272		-0.9085	-3.80042		-0.9078	-3.80195				-0.8828	-3.22665		-0.8828	-3.23665		-0.8828	-3.22156		-0.8828	-3.22829				-0.8897	-3.139		-0.8897	-3.149		-0.8897	-3.149		-0.8897	-3.14567				-0.8951	-3.11176		-0.8951	-3.12176		-0.8951
	-0.9077	-3.80771		-0.9057	-3.80771		-0.9077	-3.80541		-0.907	-3.80694				-0.8819	-3.238		-0.8819	-3.248		-0.8819	-3.23277		-0.8819	-3.23959				-0.8888	-3.14929		-0.8888	-3.15929		-0.8888	-3.15929		-0.8888	-3.15596				-0.8942	-3.12119		-0.8942	-3.13119		-0.8942
	-0.9069	-3.81276		-0.9049	-3.81276		-0.9069	-3.81046		-0.9062	-3.81199				-0.8811	-3.24957		-0.8811	-3.25957		-0.8811	-3.2442		-0.8811	-3.25111				-0.888	-3.15952		-0.888	-3.16952		-0.888	-3.16952		-0.888	-3.16618				-0.8934	-3.131		-0.8934	-3.141		-0.8934
	-0.906	-3.81759		-0.904	-3.81759		-0.906	-3.81529		-0.9053	-3.81682				-0.8803	-3.26098		-0.8803	-3.27098		-0.8803	-3.25547		-0.8803	-3.26248				-0.8872	-3.16973		-0.8872	-3.17973		-0.8872	-3.17973		-0.8872	-3.1764				-0.8926	-3.14104		-0.8926	-3.15104		-0.8926
	-0.9052	-3.82218		-0.9032	-3.82218		-0.9052	-3.81988		-0.9045	-3.82141				-0.8794	-3.27262		-0.8794	-3.28262		-0.8794	-3.26696		-0.8794	-3.27407				-0.8864	-3.18006		-0.8864	-3.19006		-0.8864	-3.19006		-0.8864	-3.18673				-0.8917	-3.15107		-0.8917	-3.16107		-0.8917
	-0.9044	-3.82652		-0.9024	-3.82652		-0.9044	-3.82422		-0.9037	-3.82576				-0.8786	-3.284		-0.8786	-3.294		-0.8786	-3.27819		-0.8786	-3.28539				-0.8855	-3.19044		-0.8855	-3.20044		-0.8855	-3.20044		-0.8855	-3.19711				-0.8909	-3.16103		-0.8909	-3.17103		-0.8909
	-0.9036	-3.83121		-0.9016	-3.83121		-0.9036	-3.82891		-0.9029	-3.83044				-0.8778	-3.29585		-0.8778	-3.30585		-0.8778	-3.28988		-0.8778	-3.29719				-0.8847	-3.20121		-0.8847	-3.21121		-0.8847	-3.21121		-0.8847	-3.20788				-0.8901	-3.17147		-0.8901	-3.18147		-0.8901
	-0.9027	-3.83565		-0.9007	-3.83565		-0.9027	-3.83335		-0.902	-3.83488				-0.8769	-3.30733		-0.8769	-3.31733		-0.8769	-3.3012		-0.8769	-3.30862				-0.8839	-3.21197		-0.8839	-3.22197		-0.8839	-3.22197		-0.8839	-3.21864				-0.8893	-3.18158		-0.8893	-3.19158		-0.8893
	-0.9019	-3.83983		-0.8999	-3.83983		-0.9019	-3.83753		-0.9012	-3.83907				-0.8761	-3.31894		-0.8761	-3.32894		-0.8761	-3.31265		-0.8761	-3.32018				-0.883	-3.22265		-0.883	-3.23265		-0.883	-3.23265		-0.883	-3.22931				-0.8884	-3.19199		-0.8884	-3.20199		-0.8884
	-0.9011	-3.84406		-0.8991	-3.84406		-0.9011	-3.84176		-0.9004	-3.84329				-0.8753	-3.33068		-0.8753	-3.34068		-0.8753	-3.32422		-0.8753	-3.33186				-0.8822	-3.23351		-0.8822	-3.24351		-0.8822	-3.24351		-0.8822	-3.24018				-0.8876	-3.20252		-0.8876	-3.21252		-0.8876
	-0.9002	-3.84771		-0.8982	-3.84771		-0.9002	-3.84541		-0.8995	-3.84694				-0.8745	-3.34237		-0.8745	-3.35237		-0.8745	-3.33573		-0.8745	-3.34349				-0.8814	-3.2442		-0.8814	-3.2542		-0.8814	-3.2542		-0.8814	-3.25087				-0.8868	-3.21304		-0.8868	-3.22304		-0.8868
	-0.8994	-3.85109		-0.8974	-3.85109		-0.8994	-3.84879		-0.8987	-3.85032				-0.8736	-3.35399		-0.8736	-3.36399		-0.8736	-3.34717		-0.8736	-3.35505				-0.8805	-3.25539		-0.8805	-3.26539		-0.8805	-3.26539		-0.8805	-3.26206				-0.8859	-3.22381		-0.8859	-3.23381		-0.8859
	-0.8986	-3.85449		-0.8966	-3.85449		-0.8986	-3.85219		-0.8979	-3.85373				-0.8728	-3.36593		-0.8728	-3.37593		-0.8728	-3.35892		-0.8728	-3.36692				-0.8797	-3.2664		-0.8797	-3.2764		-0.8797	-3.2764		-0.8797	-3.27307				-0.8851	-3.23455		-0.8851	-3.24455		-0.8851
	-0.8978	-3.85761		-0.8958	-3.85761		-0.8978	-3.85531		-0.8971	-3.85684				-0.872	-3.37768		-0.872	-3.38768		-0.872	-3.37049		-0.872	-3.37862				-0.8789	-3.27745		-0.8789	-3.28745		-0.8789	-3.28745		-0.8789	-3.28412				-0.8843	-3.24535		-0.8843	-3.25535		-0.8843
	-0.8969	-3.86107		-0.8949	-3.86107		-0.8969	-3.85877		-0.8962	-3.8603				-0.8711	-3.38955		-0.8711	-3.39955		-0.8711	-3.38216		-0.8711	-3.39042				-0.8781	-3.28887		-0.8781	-3.29887		-0.8781	-3.29887		-0.8781	-3.29553				-0.8834	-3.25618		-0.8834	-3.26618		-0.8834
	-0.8961	-3.86455		-0.8941	-3.86455		-0.8961	-3.86225		-0.8954	-3.86378				-0.8703	-3.40121		-0.8703	-3.41121		-0.8703	-3.39362		-0.8703	-3.40201				-0.8772	-3.29999		-0.8772	-3.30999		-0.8772	-3.30999		-0.8772	-3.30666				-0.8826	-3.26728		-0.8826	-3.27728		-0.8826
	-0.8953	-3.86806		-0.8933	-3.86806		-0.8953	-3.86576		-0.8946	-3.86729				-0.8695	-3.41274		-0.8695	-3.42274		-0.8695	-3.40494		-0.8695	-3.41347				-0.8764	-3.31114		-0.8764	-3.32114		-0.8764	-3.32114		-0.8764	-3.3178				-0.8818	-3.27844		-0.8818	-3.28844		-0.8818
	-0.8944	-3.87192		-0.8924	-3.87192		-0.8944	-3.86962		-0.8937	-3.87116				-0.8686	-3.42493		-0.8686	-3.43493		-0.8686	-3.41691		-0.8686	-3.42559				-0.8756	-3.32267		-0.8756	-3.33267		-0.8756	-3.33267		-0.8756	-3.32933				-0.881	-3.28963		-0.881	-3.29963		-0.881
	-0.8936	-3.87582		-0.8916	-3.87582		-0.8936	-3.87352		-0.8929	-3.87506				-0.8678	-3.43652		-0.8678	-3.44652		-0.8678	-3.42829		-0.8678	-3.43711				-0.8748	-3.33395		-0.8748	-3.34395		-0.8748	-3.34395		-0.8748	-3.34062				-0.8801	-3.30094		-0.8801	-3.31094		-0.8801
	-0.8928	-3.87943		-0.8908	-3.87943		-0.8928	-3.87713		-0.8921	-3.87866				-0.867	-3.44843		-0.867	-3.45843		-0.867	-3.43997		-0.867	-3.44894				-0.8739	-3.34553		-0.8739	-3.35553		-0.8739	-3.35553		-0.8739	-3.3522				-0.8793	-3.3122		-0.8793	-3.3222		-0.8793
	-0.8919	-3.88339		-0.8899	-3.88339		-0.8919	-3.88109		-0.8912	-3.88263				-0.8662	-3.46005		-0.8662	-3.47005		-0.8662	-3.45136		-0.8662	-3.46049				-0.8731	-3.35724		-0.8731	-3.36724		-0.8731	-3.36724		-0.8731	-3.36391				-0.8785	-3.32367		-0.8785	-3.33367		-0.8785
	-0.8911	-3.88673		-0.8891	-3.88673		-0.8911	-3.88443		-0.8904	-3.88596				-0.8653	-3.47173		-0.8653	-3.48173		-0.8653	-3.46281		-0.8653	-3.47209				-0.8723	-3.36876		-0.8723	-3.37876		-0.8723	-3.37876		-0.8723	-3.37543				-0.8776	-3.33526		-0.8776	-3.34526		-0.8776
	-0.8903	-3.89042		-0.8883	-3.89042		-0.8903	-3.88812		-0.8896	-3.88965				-0.8645	-3.48346		-0.8645	-3.49346		-0.8645	-3.47431		-0.8645	-3.48375				-0.8714	-3.38059		-0.8714	-3.39059		-0.8714	-3.39059		-0.8714	-3.38726				-0.8768	-3.34698		-0.8768	-3.35698		-0.8768
	-0.8895	-3.89415		-0.8875	-3.89415		-0.8895	-3.89185		-0.8888	-3.89338				-0.8637	-3.49526		-0.8637	-3.50526		-0.8637	-3.48585		-0.8637	-3.49546				-0.8706	-3.39233		-0.8706	-3.40233		-0.8706	-3.40233		-0.8706	-3.399				-0.876	-3.35853		-0.876	-3.36853		-0.876
	-0.8886	-3.89825		-0.8866	-3.89825		-0.8886	-3.89595		-0.8879	-3.89749				-0.8629	-3.50696		-0.8629	-3.51696		-0.8629	-3.4973		-0.8629	-3.50707				-0.8697	-3.40439		-0.8697	-3.41439		-0.8697	-3.41439		-0.8697	-3.41106				-0.8752	-3.37028		-0.8752	-3.38028		-0.8752
	-0.8878	-3.90205		-0.8858	-3.90205		-0.8878	-3.89975		-0.8871	-3.90128				-0.862	-3.51841		-0.862	-3.52841		-0.862	-3.5085		-0.862	-3.51844				-0.8689	-3.41635		-0.8689	-3.42635		-0.8689	-3.42635		-0.8689	-3.42301				-0.8743	-3.38206		-0.8743	-3.39206		-0.8743
	-0.887	-3.90553		-0.885	-3.90553		-0.887	-3.90323		-0.8863	-3.90476				-0.8612	-3.53003		-0.8612	-3.54003		-0.8612	-3.51985		-0.8612	-3.52997				-0.8681	-3.42829		-0.8681	-3.43829		-0.8681	-3.43829		-0.8681	-3.43496				-0.8735	-3.39416		-0.8735	-3.40416		-0.8735
	-0.8861	-3.90904		-0.8841	-3.90904		-0.8861	-3.90674		-0.8854	-3.90827				-0.8604	-3.54151		-0.8604	-3.55151		-0.8604	-3.53106		-0.8604	-3.54136				-0.8673	-3.44033		-0.8673	-3.45033		-0.8673	-3.45033		-0.8673	-3.447				-0.8727	-3.40605		-0.8727	-3.41605		-0.8727
	-0.8853	-3.91222		-0.8833	-3.91222		-0.8853	-3.90992		-0.8846	-3.91145				-0.8595	-3.55331		-0.8595	-3.56331		-0.8595	-3.54257		-0.8595	-3.55306				-0.8664	-3.45223		-0.8664	-3.46223		-0.8664	-3.46223		-0.8664	-3.45889				-0.8718	-3.41816		-0.8718	-3.42816		-0.8718
	-0.8845	-3.91542		-0.8825	-3.91542		-0.8845	-3.91312		-0.8838	-3.91466				-0.8587	-3.56463		-0.8587	-3.57463		-0.8587	-3.55362		-0.8587	-3.5643				-0.8656	-3.46433		-0.8656	-3.47433		-0.8656	-3.47433		-0.8656	-3.47099				-0.871	-3.43016		-0.871	-3.44016		-0.871
	-0.8836	-3.91901		-0.8816	-3.91901		-0.8836	-3.91671		-0.8829	-3.91825				-0.8579	-3.57626		-0.8579	-3.58626		-0.8579	-3.56495		-0.8579	-3.57583				-0.8648	-3.47664		-0.8648	-3.48664		-0.8648	-3.48664		-0.8648	-3.48331				-0.8702	-3.44225		-0.8702	-3.45225		-0.8702
	-0.8828	-3.92191		-0.8808	-3.92191		-0.8828	-3.91961		-0.8821	-3.92114				-0.857	-3.58754		-0.857	-3.59754		-0.857	-3.57594		-0.857	-3.587				-0.864	-3.48892		-0.864	-3.49892		-0.864	-3.49892		-0.864	-3.49559				-0.8693	-3.45445		-0.8693	-3.46445		-0.8693
	-0.882	-3.92518		-0.88	-3.92518		-0.882	-3.92288		-0.8813	-3.92442				-0.8562	-3.59912		-0.8562	-3.60912		-0.8562	-3.5872		-0.8562	-3.59848				-0.8631	-3.501		-0.8631	-3.511		-0.8631	-3.511		-0.8631	-3.50767				-0.8685	-3.46674		-0.8685	-3.47674		-0.8685
	-0.8812	-3.92812		-0.8792	-3.92812		-0.8812	-3.92582		-0.8805	-3.92735				-0.8554	-3.61013		-0.8554	-3.62013		-0.8554	-3.59791		-0.8554	-3.60939				-0.8623	-3.51314		-0.8623	-3.52314		-0.8623	-3.52314		-0.8623	-3.51981				-0.8677	-3.47912		-0.8677	-3.48912		-0.8677
	-0.8803	-3.9307		-0.8783	-3.9307		-0.8803	-3.9284		-0.8796	-3.92994				-0.8545	-3.62142		-0.8545	-3.63142		-0.8545	-3.60889		-0.8545	-3.62058				-0.8615	-3.5252		-0.8615	-3.5352		-0.8615	-3.5352		-0.8615	-3.53187				-0.8668	-3.49147		-0.8668	-3.50147		-0.8668
	-0.8795	-3.9333		-0.8775	-3.9333		-0.8795	-3.931		-0.8788	-3.93253				-0.8537	-3.63246		-0.8537	-3.64246		-0.8537	-3.61961		-0.8537	-3.63151				-0.8606	-3.53775		-0.8606	-3.54775		-0.8606	-3.54775		-0.8606	-3.54442				-0.866	-3.50362		-0.866	-3.51362		-0.866
	-0.8787	-3.93592		-0.8767	-3.93592		-0.8787	-3.93362		-0.878	-3.93515				-0.8529	-3.64359		-0.8529	-3.65359		-0.8529	-3.63041		-0.8529	-3.64253				-0.8598	-3.55006		-0.8598	-3.56006		-0.8598	-3.56006		-0.8598	-3.55673				-0.8652	-3.51599		-0.8652	-3.52599		-0.8652
	-0.8778	-3.93855		-0.8758	-3.93855		-0.8778	-3.93625		-0.8771	-3.93778				-0.8521	-3.65463		-0.8521	-3.66463		-0.8521	-3.64111		-0.8521	-3.65346				-0.859	-3.56225		-0.859	-3.57225		-0.859	-3.57225		-0.859	-3.56892				-0.8644	-3.52841		-0.8644	-3.53841		-0.8644
	-0.877	-3.94119		-0.875	-3.94119		-0.877	-3.93889		-0.8763	-3.94043				-0.8512	-3.66535		-0.8512	-3.67535		-0.8512	-3.6515		-0.8512	-3.66406				-0.8581	-3.57447		-0.8581	-3.58447		-0.8581	-3.58447		-0.8581	-3.58113				-0.8635	-3.54076		-0.8635	-3.55076		-0.8635
	-0.8762	-3.94386		-0.8742	-3.94386		-0.8762	-3.94156		-0.8755	-3.94309				-0.8504	-3.67634		-0.8504	-3.68634		-0.8504	-3.66214		-0.8504	-3.67494				-0.8573	-3.5867		-0.8573	-3.5967		-0.8573	-3.5967		-0.8573	-3.59337				-0.8627	-3.55346		-0.8627	-3.56346		-0.8627
	-0.8753	-3.94654		-0.8733	-3.94654		-0.8753	-3.94424		-0.8746	-3.94577				-0.8496	-3.68719		-0.8496	-3.69719		-0.8496	-3.67264		-0.8496	-3.68567				-0.8565	-3.59894		-0.8565	-3.60894		-0.8565	-3.60894		-0.8565	-3.60561				-0.8619	-3.56575		-0.8619	-3.57575		-0.8619
	-0.8745	-3.94923		-0.8725	-3.94923		-0.8745	-3.94693		-0.8738	-3.94847				-0.8487	-3.69789		-0.8487	-3.70789		-0.8487	-3.68298		-0.8487	-3.69625				-0.8557	-3.61154		-0.8557	-3.62154		-0.8557	-3.62154		-0.8557	-3.61821				-0.861	-3.57823		-0.861	-3.58823		-0.861
	-0.8737	-3.95156		-0.8717	-3.95156		-0.8737	-3.94926		-0.873	-3.95079				-0.8479	-3.70841		-0.8479	-3.71841		-0.8479	-3.69315		-0.8479	-3.70665				-0.8548	-3.62342		-0.8548	-3.63342		-0.8548	-3.63342		-0.8548	-3.63009				-0.8602	-3.59074		-0.8602	-3.60074		-0.8602
	-0.8729	-3.95429		-0.8709	-3.95429		-0.8729	-3.95199		-0.8722	-3.95352				-0.8471	-3.71919		-0.8471	-3.72919		-0.8471	-3.70355		-0.8471	-3.71731				-0.854	-3.63582		-0.854	-3.64582		-0.854	-3.64582		-0.854	-3.64249				-0.8594	-3.6031		-0.8594	-3.6131		-0.8594
	-0.872	-3.95664		-0.87	-3.95664		-0.872	-3.95434		-0.8713	-3.95587				-0.8463	-3.72955		-0.8463	-3.73955		-0.8463	-3.71354		-0.8463	-3.72755				-0.8532	-3.64782		-0.8532	-3.65782		-0.8532	-3.65782		-0.8532	-3.65448				-0.8586	-3.61583		-0.8586	-3.62583		-0.8586
	-0.8712	-3.9594		-0.8692	-3.9594		-0.8712	-3.9571		-0.8705	-3.95863				-0.8454	-3.73993		-0.8454	-3.74993		-0.8454	-3.72354		-0.8454	-3.7378				-0.8523	-3.65995		-0.8523	-3.66995		-0.8523	-3.66995		-0.8523	-3.66662				-0.8577	-3.62819		-0.8577	-3.63819		-0.8577
	-0.8703	-3.96218		-0.8683	-3.96218		-0.8703	-3.95988		-0.8696	-3.96141				-0.8446	-3.75007		-0.8446	-3.76007		-0.8446	-3.7333		-0.8446	-3.74781				-0.8515	-3.67223		-0.8515	-3.68223		-0.8515	-3.68223		-0.8515	-3.6789				-0.8569	-3.64054		-0.8569	-3.65054		-0.8569
	-0.8695	-3.96457		-0.8675	-3.96457		-0.8695	-3.96227		-0.8688	-3.9638				-0.8438	-3.7602		-0.8438	-3.7702		-0.8438	-3.74304		-0.8438	-3.75781				-0.8507	-3.68382		-0.8507	-3.69382		-0.8507	-3.69382		-0.8507	-3.69049				-0.8561	-3.65306		-0.8561	-3.66306		-0.8561
	-0.8687	-3.96617		-0.8667	-3.96617		-0.8687	-3.96387		-0.868	-3.96541				-0.8429	-3.77006		-0.8429	-3.78006		-0.8429	-3.75252		-0.8429	-3.76755				-0.8498	-3.69616		-0.8498	-3.70616		-0.8498	-3.70616		-0.8498	-3.70282				-0.8552	-3.66535		-0.8552	-3.67535		-0.8552
	-0.8679	-3.96819		-0.8659	-3.96819		-0.8679	-3.96589		-0.8672	-3.96742				-0.8421	-3.78015		-0.8421	-3.79015		-0.8421	-3.76221		-0.8421	-3.7775				-0.849	-3.70819		-0.849	-3.71819		-0.849	-3.71819		-0.849	-3.71485				-0.8544	-3.67778		-0.8544	-3.68778		-0.8544
	-0.867	-3.96981		-0.865	-3.96981		-0.867	-3.96751		-0.8663	-3.96904				-0.8413	-3.78968		-0.8413	-3.79968		-0.8413	-3.77134		-0.8413	-3.7869				-0.8482	-3.71988		-0.8482	-3.72988		-0.8482	-3.72988		-0.8482	-3.72654				-0.8536	-3.69016		-0.8536	-3.70016		-0.8536
	-0.8662	-3.97102		-0.8642	-3.97102		-0.8662	-3.96872		-0.8655	-3.97026				-0.8404	-3.7997		-0.8404	-3.8097		-0.8404	-3.78094		-0.8404	-3.79678				-0.8474	-3.73189		-0.8474	-3.74189		-0.8474	-3.74189		-0.8474	-3.73856				-0.8527	-3.70268		-0.8527	-3.71268		-0.8527
	-0.8654	-3.97265		-0.8634	-3.97265		-0.8654	-3.97035		-0.8647	-3.97188				-0.8396	-3.80855		-0.8396	-3.81855		-0.8396	-3.78941		-0.8396	-3.8055				-0.8465	-3.74376		-0.8465	-3.75376		-0.8465	-3.75376		-0.8465	-3.75043				-0.8519	-3.71489		-0.8519	-3.72489		-0.8519
	-0.8645	-3.97388		-0.8625	-3.97388		-0.8645	-3.97158		-0.8638	-3.97311				-0.8388	-3.81816		-0.8388	-3.82816		-0.8388	-3.7986		-0.8388	-3.81497				-0.8457	-3.75548		-0.8457	-3.76548		-0.8457	-3.76548		-0.8457	-3.76214				-0.8511	-3.72677		-0.8511	-3.73677		-0.8511
	-0.8637	-3.97551		-0.8617	-3.97551		-0.8637	-3.97321		-0.863	-3.97475				-0.8379	-3.8274		-0.8379	-3.8374		-0.8379	-3.80743		-0.8379	-3.82408				-0.8449	-3.767		-0.8449	-3.777		-0.8449	-3.777		-0.8449	-3.77367				-0.8503	-3.73898		-0.8503	-3.74898		-0.8503
	-0.8629	-3.97716		-0.8609	-3.97716		-0.8629	-3.97486		-0.8622	-3.97639				-0.8371	-3.83654		-0.8371	-3.84654		-0.8371	-3.81616		-0.8371	-3.83308				-0.844	-3.77885		-0.844	-3.78885		-0.844	-3.78885		-0.844	-3.78551				-0.8494	-3.75105		-0.8494	-3.76105		-0.8494
	-0.8621	-3.9784		-0.8601	-3.9784		-0.8621	-3.9761		-0.8614	-3.97763				-0.8363	-3.84588		-0.8363	-3.85588		-0.8363	-3.82507		-0.8363	-3.84228				-0.8432	-3.78995		-0.8432	-3.79995		-0.8432	-3.79995		-0.8432	-3.79662				-0.8486	-3.76296		-0.8486	-3.77296		-0.8486
	-0.8612	-3.98005		-0.8592	-3.98005		-0.8612	-3.97775		-0.8605	-3.97929				-0.8355	-3.85511		-0.8355	-3.86511		-0.8355	-3.83387		-0.8355	-3.85137				-0.8424	-3.80162		-0.8424	-3.81162		-0.8424	-3.81162		-0.8424	-3.80828				-0.8478	-3.77495		-0.8478	-3.78495		-0.8478
	-0.8604	-3.9813		-0.8584	-3.9813		-0.8604	-3.979		-0.8597	-3.98053				-0.8346	-3.86391		-0.8346	-3.87391		-0.8346	-3.84224		-0.8346	-3.86002				-0.8415	-3.81248		-0.8415	-3.82248		-0.8415	-3.82248		-0.8415	-3.81915				-0.8469	-3.78701		-0.8469	-3.79701		-0.8469
	-0.8596	-3.98213		-0.8576	-3.98213		-0.8596	-3.97983		-0.8589	-3.98137				-0.8338	-3.87257		-0.8338	-3.88257		-0.8338	-3.85047		-0.8338	-3.86854				-0.8407	-3.82362		-0.8407	-3.83362		-0.8407	-3.83362		-0.8407	-3.83029				-0.8461	-3.7986		-0.8461	-3.8086		-0.8461
	-0.8588	-3.98338		-0.8568	-3.98338		-0.8588	-3.98108		-0.8581	-3.98262				-0.833	-3.88174		-0.833	-3.89174		-0.833	-3.85918		-0.833	-3.87755				-0.8399	-3.83476		-0.8399	-3.84476		-0.8399	-3.84476		-0.8399	-3.84142				-0.8452	-3.80967		-0.8452	-3.81967		-0.8452
	-0.8579	-3.98464		-0.8559	-3.98464		-0.8579	-3.98234		-0.8572	-3.98387				-0.8321	-3.89042		-0.8321	-3.90042		-0.8321	-3.86742		-0.8321	-3.88609				-0.839	-3.84588		-0.839	-3.85588		-0.839	-3.85588		-0.839	-3.85255				-0.8444	-3.82131		-0.8444	-3.83131		-0.8444
	-0.8571	-3.9859		-0.8551	-3.9859		-0.8571	-3.9836		-0.8564	-3.98513				-0.8313	-3.89894		-0.8313	-3.90894		-0.8313	-3.8755		-0.8313	-3.89446				-0.8382	-3.85667		-0.8382	-3.86667		-0.8382	-3.86667		-0.8382	-3.86334				-0.8436	-3.83327		-0.8436	-3.84327		-0.8436
	-0.8563	-3.98716		-0.8543	-3.98716		-0.8563	-3.98486		-0.8556	-3.9864				-0.8305	-3.90728		-0.8305	-3.91728		-0.8305	-3.88339		-0.8305	-3.90265				-0.8374	-3.86742		-0.8374	-3.87742		-0.8374	-3.87742		-0.8374	-3.87409				-0.8428	-3.84436		-0.8428	-3.85436		-0.8428
	-0.8554	-3.98843		-0.8534	-3.98843		-0.8554	-3.98613		-0.8547	-3.98766				-0.8296	-3.91578		-0.8296	-3.92578		-0.8296	-3.89143		-0.8296	-3.911				-0.8366	-3.87844		-0.8366	-3.88844		-0.8366	-3.88844		-0.8366	-3.88511				-0.8419	-3.85574		-0.8419	-3.86574		-0.8419
	-0.8546	-3.98928		-0.8526	-3.98928		-0.8546	-3.98698		-0.8539	-3.98851				-0.8288	-3.92409		-0.8288	-3.93409		-0.8288	-3.89928		-0.8288	-3.91915				-0.8357	-3.88874		-0.8357	-3.89874		-0.8357	-3.89874		-0.8357	-3.8954				-0.8411	-3.86678		-0.8411	-3.87678		-0.8411
	-0.8538	-3.9897		-0.8518	-3.9897		-0.8538	-3.9874		-0.8531	-3.98893				-0.828	-3.93181		-0.828	-3.94181		-0.828	-3.90658		-0.828	-3.92674				-0.8349	-3.89963		-0.8349	-3.90963		-0.8349	-3.90963		-0.8349	-3.9063				-0.8403	-3.87811		-0.8403	-3.88811		-0.8403
	-0.8529	-3.99097		-0.8509	-3.99097		-0.8529	-3.98867		-0.8522	-3.99021				-0.8272	-3.94006		-0.8272	-3.95006		-0.8272	-3.91435		-0.8272	-3.93482				-0.8341	-3.91009		-0.8341	-3.92009		-0.8341	-3.92009		-0.8341	-3.91676				-0.8395	-3.88907		-0.8395	-3.89907		-0.8395
	-0.8521	-3.99225		-0.8501	-3.99225		-0.8521	-3.98995		-0.8514	-3.99149				-0.8263	-3.94769		-0.8263	-3.95769		-0.8263	-3.92154		-0.8263	-3.94231				-0.8332	-3.91973		-0.8332	-3.92973		-0.8332	-3.92973		-0.8332	-3.9264				-0.8386	-3.89997		-0.8386	-3.90997		-0.8386
	-0.8513	-3.99353		-0.8493	-3.99353		-0.8513	-3.99123		-0.8506	-3.99277				-0.8255	-3.95546		-0.8255	-3.96546		-0.8255	-3.92885		-0.8255	-3.94993				-0.8324	-3.92959		-0.8324	-3.93959		-0.8324	-3.93959		-0.8324	-3.93626				-0.8378	-3.9108		-0.8378	-3.9208		-0.8378
	-0.8504	-3.99525		-0.8484	-3.99525		-0.8504	-3.99295		-0.8497	-3.99448				-0.8247	-3.96377		-0.8247	-3.97377		-0.8247	-3.93667		-0.8247	-3.95807				-0.8316	-3.94044		-0.8316	-3.95044		-0.8316	-3.95044		-0.8316	-3.9471				-0.837	-3.92154		-0.837	-3.93154		-0.837
	-0.8496	-3.99654		-0.8476	-3.99654		-0.8496	-3.99424		-0.8489	-3.99577				-0.8238	-3.97143		-0.8238	-3.98143		-0.8238	-3.94386		-0.8238	-3.96557				-0.8307	-3.95039		-0.8307	-3.96039		-0.8307	-3.96039		-0.8307	-3.95706				-0.8361	-3.93219		-0.8361	-3.94219		-0.8361
	-0.8488	-3.99827		-0.8468	-3.99827		-0.8488	-3.99597		-0.8481	-3.9975				-0.823	-3.97881		-0.823	-3.98881		-0.823	-3.95078		-0.823	-3.9728				-0.8299	-3.96059		-0.8299	-3.97059		-0.8299	-3.97059		-0.8299	-3.96725				-0.8353	-3.94271		-0.8353	-3.95271		-0.8353
	-0.848	-3.99957		-0.846	-3.99957		-0.848	-3.99727		-0.8473	-3.9988				-0.8222	-3.9859		-0.8222	-3.9959		-0.8222	-3.95742		-0.8222	-3.97974				-0.8291	-3.9694		-0.8291	-3.9794		-0.8291	-3.9794		-0.8291	-3.97607				-0.8345	-3.95311		-0.8345	-3.96311		-0.8345
	-0.8471	-4.00117		-0.8451	-4.00117		-0.8471	-3.99887		-0.8464	-4.00041				-0.8214	-3.99353		-0.8214	-4.00353		-0.8214	-3.96457		-0.8214	-3.98721				-0.8283	-3.97964		-0.8283	-3.98964		-0.8283	-3.98964		-0.8283	-3.98631				-0.8337	-3.96337		-0.8337	-3.97337		-0.8337
	-0.8463	-4.00288		-0.8443	-4.00288		-0.8463	-4.00058		-0.8456	-4.00211				-0.8205	-4.0013		-0.8205	-4.0113		-0.8205	-3.97184		-0.8205	-3.99482				-0.8274	-3.98928		-0.8274	-3.99928		-0.8274	-3.99928		-0.8274	-3.99594				-0.8328	-3.97347		-0.8328	-3.98347		-0.8328
	-0.8454	-4.00458		-0.8434	-4.00458		-0.8454	-4.00228		-0.8447	-4.00382				-0.8197	-4.00855		-0.8197	-4.01855		-0.8197	-3.9786		-0.8197	-4.0019				-0.8266	-3.99957		-0.8266	-4.00957		-0.8266	-4.00957		-0.8266	-4.00623				-0.832	-3.98338		-0.832	-3.99338		-0.832
	-0.8446	-4.00661		-0.8426	-4.00661		-0.8446	-4.00431		-0.8439	-4.00584				-0.8189	-4.01538		-0.8189	-4.02538		-0.8189	-3.98498		-0.8189	-4.00858				-0.8258	-4.00802		-0.8258	-4.01802		-0.8258	-4.01802		-0.8258	-4.01469				-0.8312	-3.99353		-0.8312	-4.00353		-0.8312
	-0.8438	-4.00851		-0.8418	-4.00851		-0.8438	-4.00621		-0.8431	-4.00774				-0.818	-4.02292		-0.818	-4.03292		-0.818	-3.992		-0.818	-4.01594				-0.8249	-4.01777		-0.8249	-4.02777		-0.8249	-4.02777		-0.8249	-4.02444				-0.8303	-4.00309		-0.8303	-4.01309		-0.8303
	-0.843	-4.01064		-0.841	-4.01064		-0.843	-4.00834		-0.8423	-4.00987				-0.8172	-4.03054		-0.8172	-4.04054		-0.8172	-3.99909		-0.8172	-4.02339				-0.8241	-4.0272		-0.8241	-4.0372		-0.8241	-4.0372		-0.8241	-4.03386				-0.8295	-4.01336		-0.8295	-4.02336		-0.8295
	-0.8421	-4.01274		-0.8401	-4.01274		-0.8421	-4.01044		-0.8414	-4.01197				-0.8164	-4.0372		-0.8164	-4.0472		-0.8164	-4.00529		-0.8164	-4.0299				-0.8233	-4.0356		-0.8233	-4.0456		-0.8233	-4.0456		-0.8233	-4.04227				-0.8287	-4.02283		-0.8287	-4.03283		-0.8287
	-0.8413	-4.0148		-0.8393	-4.0148		-0.8413	-4.0125		-0.8406	-4.01403				-0.8156	-4.04335		-0.8156	-4.05335		-0.8156	-4.011		-0.8156	-4.0359				-0.8225	-4.04513		-0.8225	-4.05513		-0.8225	-4.05513		-0.8225	-4.0518				-0.8278	-4.03203		-0.8278	-4.04203		-0.8278
	-0.8405	-4.01719		-0.8385	-4.01719		-0.8405	-4.01489		-0.8398	-4.01642				-0.8147	-4.05115		-0.8147	-4.06115		-0.8147	-4.01823		-0.8147	-4.04351				-0.8216	-4.05345		-0.8216	-4.06345		-0.8216	-4.06345		-0.8216	-4.06012				-0.827	-4.04168		-0.827	-4.05168		-0.827
	-0.8397	-4.01913		-0.8377	-4.01913		-0.8397	-4.01683		-0.839	-4.01837				-0.8139	-4.05745		-0.8139	-4.06745		-0.8139	-4.02406		-0.8139	-4.04965				-0.8208	-4.06233		-0.8208	-4.07233		-0.8208	-4.07233		-0.8208	-4.069				-0.8262	-4.05076		-0.8262	-4.06076		-0.8262
	-0.8388	-4.02114		-0.8368	-4.02114		-0.8388	-4.01884		-0.8381	-4.02037				-0.8131	-4.06434		-0.8131	-4.07434		-0.8131	-4.03044		-0.8131	-4.05638				-0.82	-4.0714		-0.82	-4.0814		-0.82	-4.0814		-0.82	-4.07807				-0.8254	-4.06008		-0.8254	-4.07008		-0.8254
	-0.838	-4.02283		-0.836	-4.02283		-0.838	-4.02053		-0.8373	-4.02206				-0.8122	-4.07079		-0.8122	-4.08079		-0.8122	-4.0364		-0.8122	-4.06266				-0.8191	-4.07967		-0.8191	-4.08967		-0.8191	-4.08967		-0.8191	-4.08633				-0.8245	-4.06834		-0.8245	-4.07834		-0.8245
	-0.8372	-4.02461		-0.8352	-4.02461		-0.8372	-4.02231		-0.8365	-4.02385				-0.8114	-4.07753		-0.8114	-4.08753		-0.8114	-4.04263		-0.8114	-4.06923				-0.8183	-4.08799		-0.8183	-4.09799		-0.8183	-4.09799		-0.8183	-4.09466				-0.8237	-4.07779		-0.8237	-4.08779		-0.8237
	-0.8363	-4.02641		-0.8343	-4.02641		-0.8363	-4.02411		-0.8356	-4.02564				-0.8106	-4.08434		-0.8106	-4.09434		-0.8106	-4.04891		-0.8106	-4.07586				-0.8175	-4.09648		-0.8175	-4.10648		-0.8175	-4.10648		-0.8175	-4.10314				-0.8229	-4.08635		-0.8229	-4.09635		-0.8229
	-0.8355	-4.02808		-0.8335	-4.02808		-0.8355	-4.02578		-0.8348	-4.02731				-0.8097	-4.09034		-0.8097	-4.10034		-0.8097	-4.05443		-0.8097	-4.0817				-0.8167	-4.10508		-0.8167	-4.11508		-0.8167	-4.11508		-0.8167	-4.11174				-0.822	-4.09501		-0.822	-4.10501		-0.822
	-0.8347	-4.02956		-0.8327	-4.02956		-0.8347	-4.02726		-0.834	-4.02879				-0.8089	-4.09707		-0.8089	-4.10707		-0.8089	-4.06063		-0.8089	-4.08826				-0.8158	-4.11317		-0.8158	-4.12317		-0.8158	-4.12317		-0.8158	-4.11984				-0.8212	-4.10414		-0.8212	-4.11414		-0.8212
	-0.8339	-4.03105		-0.8319	-4.03105		-0.8339	-4.02875		-0.8332	-4.03028				-0.8081	-4.10353		-0.8081	-4.11353		-0.8081	-4.06656		-0.8081	-4.09454				-0.815	-4.12165		-0.815	-4.13165		-0.815	-4.13165		-0.815	-4.12832				-0.8204	-4.11216		-0.8204	-4.12216		-0.8204
	-0.833	-4.03255		-0.831	-4.03255		-0.833	-4.03025		-0.8323	-4.03178				-0.8073	-4.10969		-0.8073	-4.11969		-0.8073	-4.07222		-0.8073	-4.10053				-0.8142	-4.12919		-0.8142	-4.13919		-0.8142	-4.13919		-0.8142	-4.13585				-0.8195	-4.12039		-0.8195	-4.13039		-0.8195
	-0.8322	-4.03423		-0.8302	-4.03423		-0.8322	-4.03193		-0.8315	-4.03347				-0.8064	-4.11617		-0.8064	-4.12617		-0.8064	-4.07816		-0.8064	-4.10683				-0.8133	-4.13733		-0.8133	-4.14733		-0.8133	-4.14733		-0.8133	-4.144				-0.8187	-4.12925		-0.8187	-4.13925		-0.8187
	-0.8314	-4.03565		-0.8294	-4.03565		-0.8314	-4.03335		-0.8307	-4.03488				-0.8056	-4.12286		-0.8056	-4.13286		-0.8056	-4.08428		-0.8056	-4.11333				-0.8125	-4.14527		-0.8125	-4.15527		-0.8125	-4.15527		-0.8125	-4.15194				-0.8179	-4.13817		-0.8179	-4.14817		-0.8179
	-0.8305	-4.03702		-0.8285	-4.03702		-0.8305	-4.03472		-0.8298	-4.03625				-0.8048	-4.12854		-0.8048	-4.13854		-0.8048	-4.08948		-0.8048	-4.11886				-0.8117	-4.1528		-0.8117	-4.1628		-0.8117	-4.1628		-0.8117	-4.15946				-0.8171	-4.14606		-0.8171	-4.15606		-0.8171
	-0.8297	-4.03844		-0.8277	-4.03844		-0.8297	-4.03614		-0.829	-4.03767				-0.8039	-4.13513		-0.8039	-4.14513		-0.8039	-4.0955		-0.8039	-4.12526				-0.8109	-4.16115		-0.8109	-4.17115		-0.8109	-4.17115		-0.8109	-4.16782				-0.8162	-4.15416		-0.8162	-4.16416		-0.8162
	-0.8289	-4.03972		-0.8269	-4.03972		-0.8289	-4.03742		-0.8282	-4.03895				-0.8031	-4.14092		-0.8031	-4.15092		-0.8031	-4.10078		-0.8031	-4.13088				-0.81	-4.1689		-0.81	-4.1789		-0.81	-4.1789		-0.81	-4.17557				-0.8154	-4.16216		-0.8154	-4.17216		-0.8154
	-0.828	-4.0411		-0.826	-4.0411		-0.828	-4.0388		-0.8273	-4.04034				-0.8023	-4.14795		-0.8023	-4.15795		-0.8023	-4.10718		-0.8023	-4.13769				-0.8092	-4.17666		-0.8092	-4.18666		-0.8092	-4.18666		-0.8092	-4.18332				-0.8146	-4.17037		-0.8146	-4.18037		-0.8146
	-0.8272	-4.04239		-0.8252	-4.04239		-0.8272	-4.04009		-0.8265	-4.04163				-0.8015	-4.15397		-0.8015	-4.16397		-0.8015	-4.11266		-0.8015	-4.14354				-0.8084	-4.18409		-0.8084	-4.19409		-0.8084	-4.19409		-0.8084	-4.19076				-0.8138	-4.17862		-0.8138	-4.18862		-0.8138
	-0.8264	-4.04388		-0.8244	-4.04388		-0.8264	-4.04158		-0.8257	-4.04311				-0.8006	-4.1604		-0.8006	-4.1704		-0.8006	-4.1185		-0.8006	-4.14976				-0.8075	-4.19159		-0.8075	-4.20159		-0.8075	-4.20159		-0.8075	-4.19825				-0.8129	-4.18622		-0.8129	-4.19622		-0.8129
	-0.8255	-4.04552		-0.8235	-4.04552		-0.8255	-4.04322		-0.8248	-4.04475				-0.7998	-4.16615		-0.7998	-4.17615		-0.7998	-4.12372		-0.7998	-4.15534				-0.8067	-4.1988		-0.8067	-4.2088		-0.8067	-4.2088		-0.8067	-4.20547				-0.8121	-4.1945		-0.8121	-4.2045		-0.8121
	-0.8247	-4.04716		-0.8227	-4.04716		-0.8247	-4.04486		-0.824	-4.04639				-0.799	-4.17179		-0.799	-4.18179		-0.799	-4.12884		-0.799	-4.16081				-0.8059	-4.2067		-0.8059	-4.2167		-0.8059	-4.2167		-0.8059	-4.21337				-0.8113	-4.20259		-0.8113	-4.21259		-0.8113
	-0.8239	-4.04891		-0.8219	-4.04891		-0.8239	-4.04661		-0.8232	-4.04814				-0.7981	-4.17842		-0.7981	-4.18842		-0.7981	-4.13484		-0.7981	-4.16723				-0.805	-4.2141		-0.805	-4.2241		-0.805	-4.2241		-0.805	-4.22077				-0.8104	-4.2095		-0.8104	-4.2195		-0.8104
	-0.823	-4.05056		-0.821	-4.05056		-0.823	-4.04826		-0.8223	-4.04979				-0.7973	-4.18462		-0.7973	-4.19462		-0.7973	-4.14044		-0.7973	-4.17323				-0.8042	-4.22185		-0.8042	-4.23185		-0.8042	-4.23185		-0.8042	-4.22852				-0.8096	-4.21703		-0.8096	-4.22703		-0.8096
	-0.8222	-4.05252		-0.8202	-4.05252		-0.8222	-4.05022		-0.8215	-4.05175				-0.7965	-4.19091		-0.7965	-4.20091		-0.7965	-4.14612		-0.7965	-4.17931				-0.8034	-4.22952		-0.8034	-4.23952		-0.8034	-4.23952		-0.8034	-4.23618				-0.8088	-4.22512		-0.8088	-4.23512		-0.8088
	-0.8214	-4.05438		-0.8194	-4.05438		-0.8214	-4.05208		-0.8207	-4.05362				-0.7956	-4.19688		-0.7956	-4.20688		-0.7956	-4.1515		-0.7956	-4.18509				-0.8026	-4.23575		-0.8026	-4.24575		-0.8026	-4.24575		-0.8026	-4.24242				-0.8079	-4.23292		-0.8079	-4.24292		-0.8079
	-0.8206	-4.05641		-0.8186	-4.05641		-0.8206	-4.05411		-0.8199	-4.05564				-0.7948	-4.20301		-0.7948	-4.21301		-0.7948	-4.15702		-0.7948	-4.19101				-0.8017	-4.24314		-0.8017	-4.25314		-0.8017	-4.25314		-0.8017	-4.2498				-0.8071	-4.24003		-0.8071	-4.25003		-0.8071
	-0.8197	-4.05814		-0.8177	-4.05814		-0.8197	-4.05584		-0.819	-4.05737				-0.794	-4.20964		-0.794	-4.21964		-0.794	-4.16298		-0.794	-4.19742				-0.8009	-4.25019		-0.8009	-4.26019		-0.8009	-4.26019		-0.8009	-4.25685				-0.8063	-4.24734		-0.8063	-4.25734		-0.8063
	-0.8189	-4.05983		-0.8169	-4.05983		-0.8189	-4.05753		-0.8182	-4.05907				-0.7931	-4.2146		-0.7931	-4.2246		-0.7931	-4.16743		-0.7931	-4.20221				-0.8001	-4.25712		-0.8001	-4.26712		-0.8001	-4.26712		-0.8001	-4.26378				-0.8054	-4.25508		-0.8054	-4.26508		-0.8054
	-0.8181	-4.06113		-0.8161	-4.06113		-0.8181	-4.05883		-0.8174	-4.06036				-0.7923	-4.22055		-0.7923	-4.23055		-0.7923	-4.17276		-0.7923	-4.20795				-0.7992	-4.26448		-0.7992	-4.27448		-0.7992	-4.27448		-0.7992	-4.27115				-0.8046	-4.26217		-0.8046	-4.27217		-0.8046
	-0.8173	-4.06258		-0.8153	-4.06258		-0.8173	-4.06028		-0.8166	-4.06182				-0.7915	-4.22738		-0.7915	-4.23738		-0.7915	-4.17888		-0.7915	-4.21455				-0.7984	-4.27197		-0.7984	-4.28197		-0.7984	-4.28197		-0.7984	-4.27864				-0.8038	-4.26954		-0.8038	-4.27954		-0.8038
	-0.8164	-4.06384		-0.8144	-4.06384		-0.8164	-4.06154		-0.8157	-4.06307				-0.7907	-4.23307		-0.7907	-4.24307		-0.7907	-4.18396		-0.7907	-4.22003				-0.7976	-4.27934		-0.7976	-4.28934		-0.7976	-4.28934		-0.7976	-4.28601				-0.803	-4.27704		-0.803	-4.28704		-0.803
	-0.8156	-4.0651		-0.8136	-4.0651		-0.8156	-4.0628		-0.8149	-4.06433				-0.7898	-4.2386		-0.7898	-4.2486		-0.7898	-4.18889		-0.7898	-4.22536				-0.7967	-4.28609		-0.7967	-4.29609		-0.7967	-4.29609		-0.7967	-4.29276				-0.8021	-4.2845		-0.8021	-4.2945		-0.8021
	-0.8148	-4.06651		-0.8128	-4.06651		-0.8148	-4.06421		-0.8141	-4.06575				-0.789	-4.24504		-0.789	-4.25504		-0.789	-4.19464		-0.789	-4.23157				-0.7959	-4.29337		-0.7959	-4.30337		-0.7959	-4.30337		-0.7959	-4.30003				-0.8013	-4.292		-0.8013	-4.302		-0.8013
	-0.814	-4.06788		-0.812	-4.06788		-0.814	-4.06558		-0.8133	-4.06711				-0.7882	-4.25228		-0.7882	-4.26228		-0.7882	-4.20107		-0.7882	-4.23854				-0.7951	-4.30155		-0.7951	-4.31155		-0.7951	-4.31155		-0.7951	-4.30822				-0.8005	-4.2993		-0.8005	-4.3093		-0.8005
	-0.8131	-4.06946		-0.8111	-4.06946		-0.8131	-4.06716		-0.8124	-4.06869				-0.7873	-4.25908		-0.7873	-4.26908		-0.7873	-4.20712		-0.7873	-4.2451				-0.7942	-4.30795		-0.7942	-4.31795		-0.7942	-4.31795		-0.7942	-4.31461				-0.7996	-4.30583		-0.7996	-4.31583		-0.7996
	-0.8123	-4.07079		-0.8103	-4.07079		-0.8123	-4.06849		-0.8116	-4.07002				-0.7865	-4.26305		-0.7865	-4.27305		-0.7865	-4.21063		-0.7865	-4.24891				-0.7934	-4.31533		-0.7934	-4.32533		-0.7934	-4.32533		-0.7934	-4.322				-0.7988	-4.31426		-0.7988	-4.32426		-0.7988
	-0.8115	-4.07222		-0.8095	-4.07222		-0.8115	-4.06992		-0.8108	-4.07145				-0.7857	-4.27011		-0.7857	-4.28011		-0.7857	-4.21688		-0.7857	-4.2557				-0.7926	-4.32221		-0.7926	-4.33221		-0.7926	-4.33221		-0.7926	-4.32888				-0.798	-4.32084		-0.798	-4.33084		-0.798
	-0.8106	-4.07366		-0.8086	-4.07366		-0.8106	-4.07136		-0.8099	-4.07289				-0.7849	-4.27638		-0.7849	-4.28638		-0.7849	-4.22243		-0.7849	-4.26173				-0.7918	-4.32883		-0.7918	-4.33883		-0.7918	-4.33883		-0.7918	-4.33549				-0.7972	-4.32855		-0.7972	-4.33855		-0.7972
	-0.8098	-4.07448		-0.8078	-4.07448		-0.8098	-4.07218		-0.8091	-4.07371				-0.784	-4.28291		-0.784	-4.29291		-0.784	-4.22819		-0.784	-4.26801				-0.7909	-4.33592		-0.7909	-4.34592		-0.7909	-4.34592		-0.7909	-4.34259				-0.7963	-4.33573		-0.7963	-4.34573		-0.7963
	-0.809	-4.0752		-0.807	-4.0752		-0.809	-4.0729		-0.8083	-4.07444				-0.7832	-4.28946		-0.7832	-4.29946		-0.7832	-4.23396		-0.7832	-4.27429				-0.7901	-4.34323		-0.7901	-4.35323		-0.7901	-4.35323		-0.7901	-4.3499				-0.7955	-4.34352		-0.7955	-4.35352		-0.7955
	-0.8081	-4.07588		-0.8061	-4.07588		-0.8081	-4.07358		-0.8074	-4.07511				-0.7824	-4.29542		-0.7824	-4.30542		-0.7824	-4.2392		-0.7824	-4.28001				-0.7893	-4.35018		-0.7893	-4.36018		-0.7893	-4.36018		-0.7893	-4.35685				-0.7947	-4.35008		-0.7947	-4.36008		-0.7947
	-0.8073	-4.07645		-0.8053	-4.07645		-0.8073	-4.07415		-0.8066	-4.07568				-0.7815	-4.30181		-0.7815	-4.31181		-0.7815	-4.24481		-0.7815	-4.28615				-0.7885	-4.35773		-0.7885	-4.36773		-0.7885	-4.36773		-0.7885	-4.3644				-0.7938	-4.35724		-0.7938	-4.36724		-0.7938
	-0.8065	-4.07738		-0.8045	-4.07738		-0.8065	-4.07508		-0.8058	-4.07661				-0.7807	-4.30927		-0.7807	-4.31927		-0.7807	-4.25135		-0.7807	-4.2933				-0.7876	-4.36472		-0.7876	-4.37472		-0.7876	-4.37472		-0.7876	-4.37138				-0.793	-4.36492		-0.793	-4.37492		-0.793
	-0.8056	-4.07821		-0.8036	-4.07821		-0.8056	-4.07591		-0.8049	-4.07744				-0.7799	-4.3156		-0.7799	-4.3256		-0.7799	-4.25688		-0.7799	-4.29936				-0.7868	-4.37233		-0.7868	-4.38233		-0.7868	-4.38233		-0.7868	-4.37899				-0.7922	-4.37253		-0.7922	-4.38253		-0.7922
	-0.8048	-4.07904		-0.8028	-4.07904		-0.8048	-4.07674		-0.8041	-4.07828				-0.779	-4.32094		-0.779	-4.33094		-0.779	-4.26154		-0.779	-4.30447				-0.786	-4.37903		-0.786	-4.38903		-0.786	-4.38903		-0.786	-4.3857				-0.7913	-4.38018		-0.7913	-4.39018		-0.7913
	-0.804	-4.08035		-0.802	-4.08035		-0.804	-4.07805		-0.8033	-4.07958				-0.7782	-4.32818		-0.7782	-4.33818		-0.7782	-4.26785		-0.7782	-4.3114				-0.7851	-4.38669		-0.7851	-4.39669		-0.7851	-4.39669		-0.7851	-4.39335				-0.7905	-4.38711		-0.7905	-4.39711		-0.7905
	-0.8031	-4.08181		-0.8011	-4.08181		-0.8031	-4.07951		-0.8024	-4.08105				-0.7774	-4.33555		-0.7774	-4.34555		-0.7774	-4.27425		-0.7774	-4.31845				-0.7843	-4.39405		-0.7843	-4.40405		-0.7843	-4.40405		-0.7843	-4.40072				-0.7897	-4.39513		-0.7897	-4.40513		-0.7897
	-0.8023	-4.08365		-0.8003	-4.08365		-0.8023	-4.08135		-0.8016	-4.08288				-0.7765	-4.34208		-0.7765	-4.35208		-0.7765	-4.27992		-0.7765	-4.3247				-0.7835	-4.40121		-0.7835	-4.41121		-0.7835	-4.41121		-0.7835	-4.40788				-0.7889	-4.4022		-0.7889	-4.4122		-0.7889
	-0.8015	-4.08534		-0.7995	-4.08534		-0.8015	-4.08304		-0.8008	-4.08457				-0.7757	-4.34853		-0.7757	-4.35853		-0.7757	-4.2855		-0.7757	-4.33085				-0.7827	-4.40916		-0.7827	-4.41916		-0.7827	-4.41916		-0.7827	-4.41582				-0.788	-4.41005		-0.788	-4.42005		-0.788
	-0.8007	-4.08725		-0.7987	-4.08725		-0.8007	-4.08495		-0.8	-4.08648				-0.7749	-4.35556		-0.7749	-4.36556		-0.7749	-4.29158		-0.7749	-4.33757				-0.7818	-4.41567		-0.7818	-4.42567		-0.7818	-4.42567		-0.7818	-4.42234				-0.7872	-4.41737		-0.7872	-4.42737		-0.7872
	-0.7998	-4.08927		-0.7978	-4.08927		-0.7998	-4.08697		-0.7991	-4.0885				-0.7741	-4.36241		-0.7741	-4.37241		-0.7741	-4.29748		-0.7741	-4.3441				-0.781	-4.42447		-0.781	-4.43447		-0.781	-4.43447		-0.781	-4.43113				-0.7864	-4.42562		-0.7864	-4.43562		-0.7864
	-0.799	-4.0913		-0.797	-4.0913		-0.799	-4.089		-0.7983	-4.09053				-0.7732	-4.36988		-0.7732	-4.37988		-0.7732	-4.30391		-0.7732	-4.35122				-0.7802	-4.43086		-0.7802	-4.44086		-0.7802	-4.44086		-0.7802	-4.43753				-0.7855	-4.43297		-0.7855	-4.44297		-0.7855
	-0.7982	-4.09275		-0.7962	-4.09275		-0.7982	-4.09045		-0.7975	-4.09198				-0.7724	-4.37634		-0.7724	-4.38634		-0.7724	-4.30945		-0.7724	-4.35737				-0.7793	-4.44009		-0.7793	-4.45009		-0.7793	-4.45009		-0.7793	-4.44676				-0.7847	-4.44117		-0.7847	-4.45117		-0.7847
	-0.7973	-4.09377		-0.7953	-4.09377		-0.7973	-4.09147		-0.7966	-4.09301				-0.7716	-4.38426		-0.7716	-4.39426		-0.7716	-4.31623		-0.7716	-4.36492				-0.7785	-4.44806		-0.7785	-4.45806		-0.7785	-4.45806		-0.7785	-4.45473				-0.7839	-4.44855		-0.7839	-4.45855		-0.7839
	-0.7965	-4.09474		-0.7945	-4.09474		-0.7965	-4.09244		-0.7958	-4.09398				-0.7707	-4.39115		-0.7707	-4.40115		-0.7707	-4.32212		-0.7707	-4.37148				-0.7777	-4.45531		-0.7777	-4.46531		-0.7777	-4.46531		-0.7777	-4.46198				-0.783	-4.4578		-0.783	-4.4678		-0.783
	-0.7957	-4.0961		-0.7937	-4.0961		-0.7957	-4.0938		-0.795	-4.09533				-0.7699	-4.39924		-0.7699	-4.40924		-0.7699	-4.32901		-0.7699	-4.37917				-0.7768	-4.46332		-0.7768	-4.47332		-0.7768	-4.47332		-0.7768	-4.46998				-0.7822	-4.46648		-0.7822	-4.47648		-0.7822
	-0.7949	-4.09767		-0.7929	-4.09767		-0.7949	-4.09537		-0.7942	-4.0969				-0.7691	-4.40539		-0.7691	-4.41539		-0.7691	-4.33423		-0.7691	-4.385				-0.776	-4.4716		-0.776	-4.4816		-0.776	-4.4816		-0.776	-4.47826				-0.7814	-4.47314		-0.7814	-4.48314		-0.7814
	-0.794	-4.09969		-0.792	-4.09969		-0.794	-4.09739		-0.7933	-4.09892				-0.7682	-4.41296		-0.7682	-4.42296		-0.7682	-4.34065		-0.7682	-4.39219				-0.7752	-4.48017		-0.7752	-4.49017		-0.7752	-4.49017		-0.7752	-4.48684				-0.7805	-4.48175		-0.7805	-4.49175		-0.7805
	-0.7932	-4.10199		-0.7912	-4.10199		-0.7932	-4.09969		-0.7925	-4.10122				-0.7674	-4.42251		-0.7674	-4.43251		-0.7674	-4.34872		-0.7674	-4.40125				-0.7743	-4.48705		-0.7743	-4.49705		-0.7743	-4.49705		-0.7743	-4.49372				-0.7797	-4.48945		-0.7797	-4.49945		-0.7797
	-0.7924	-4.10425		-0.7904	-4.10425		-0.7924	-4.10195		-0.7917	-4.10348				-0.7666	-4.42922		-0.7666	-4.43922		-0.7666	-4.35438		-0.7666	-4.40761				-0.7735	-4.49526		-0.7735	-4.50526		-0.7735	-4.50526		-0.7735	-4.50192				-0.7789	-4.49908		-0.7789	-4.50908		-0.7789
	-0.7915	-4.10629		-0.7895	-4.10629		-0.7915	-4.10399		-0.7908	-4.10553				-0.7658	-4.43747		-0.7658	-4.44747		-0.7658	-4.36131		-0.7658	-4.41542				-0.7727	-4.50362		-0.7727	-4.51362		-0.7727	-4.51362		-0.7727	-4.51029				-0.7781	-4.50738		-0.7781	-4.51738		-0.7781
	-0.7907	-4.10852		-0.7887	-4.10852		-0.7907	-4.10622		-0.79	-4.10775				-0.7649	-4.44503		-0.7649	-4.45503		-0.7649	-4.36764		-0.7649	-4.42257				-0.7719	-4.513		-0.7719	-4.523		-0.7719	-4.523		-0.7719	-4.51967				-0.7772	-4.51542		-0.7772	-4.52542		-0.7772
	-0.7899	-4.11109		-0.7879	-4.11109		-0.7899	-4.10879		-0.7892	-4.11032				-0.7641	-4.45272		-0.7641	-4.46272		-0.7641	-4.37407		-0.7641	-4.42984				-0.771	-4.52187		-0.771	-4.53187		-0.771	-4.53187		-0.771	-4.52853				-0.7764	-4.52549		-0.7764	-4.53549		-0.7764
	-0.789	-4.11396		-0.787	-4.11396		-0.789	-4.11166		-0.7883	-4.11319				-0.7633	-4.4618		-0.7633	-4.4718		-0.7633	-4.38164		-0.7633	-4.43841				-0.7702	-4.52988		-0.7702	-4.53988		-0.7702	-4.53988		-0.7702	-4.53655				-0.7756	-4.53417		-0.7756	-4.54417		-0.7756
	-0.7882	-4.11702		-0.7862	-4.11702		-0.7882	-4.11472		-0.7875	-4.11625				-0.7624	-4.47006		-0.7624	-4.48006		-0.7624	-4.38849		-0.7624	-4.4462				-0.7694	-4.53955		-0.7694	-4.54955		-0.7694	-4.54955		-0.7694	-4.54622				-0.7748	-4.54197		-0.7748	-4.55197		-0.7748
	-0.7874	-4.11959		-0.7854	-4.11959		-0.7874	-4.11729		-0.7867	-4.11882				-0.7616	-4.47925		-0.7616	-4.48925		-0.7616	-4.3961		-0.7616	-4.45487				-0.7685	-4.55006		-0.7685	-4.56006		-0.7685	-4.56006		-0.7685	-4.55673				-0.7739	-4.55191		-0.7739	-4.56191		-0.7739
	-0.7866	-4.12171		-0.7846	-4.12171		-0.7866	-4.11941		-0.7859	-4.12094				-0.7608	-4.48852		-0.7608	-4.49852		-0.7608	-4.40373		-0.7608	-4.46359				-0.7677	-4.55815		-0.7677	-4.56815		-0.7677	-4.56815		-0.7677	-4.56481				-0.7731	-4.56083		-0.7731	-4.57083		-0.7731
	-0.7857	-4.12349		-0.7837	-4.12349		-0.7857	-4.12119		-0.785	-4.12273				-0.76	-4.49689		-0.76	-4.50689		-0.76	-4.41061		-0.76	-4.47146				-0.7669	-4.56607		-0.7669	-4.57607		-0.7669	-4.57607		-0.7669	-4.57274				-0.7723	-4.57089		-0.7723	-4.58089		-0.7723
	-0.7849	-4.12552		-0.7829	-4.12552		-0.7849	-4.12322		-0.7842	-4.12475				-0.7591	-4.50766		-0.7591	-4.51766		-0.7591	-4.41942		-0.7591	-4.48158				-0.766	-4.57577		-0.766	-4.58577		-0.766	-4.58577		-0.766	-4.58244				-0.7714	-4.58104		-0.7714	-4.59104		-0.7714
	-0.7841	-4.12802		-0.7821	-4.12802		-0.7841	-4.12572		-0.7834	-4.12725				-0.7583	-4.51456		-0.7583	-4.52456		-0.7583	-4.42504		-0.7583	-4.48806				-0.7652	-4.58804		-0.7652	-4.59804		-0.7652	-4.59804		-0.7652	-4.59471				-0.7706	-4.59125		-0.7706	-4.60125		-0.7706
	-0.7833	-4.13083		-0.7813	-4.13083		-0.7833	-4.12853		-0.7826	-4.13006				-0.7575	-4.52535		-0.7575	-4.53535		-0.7575	-4.4338		-0.7575	-4.49816				-0.7644	-4.59757		-0.7644	-4.60757		-0.7644	-4.60757		-0.7644	-4.60423				-0.7698	-4.6038		-0.7698	-4.6138		-0.7698
	-0.7824	-4.13436		-0.7804	-4.13436		-0.7824	-4.13206		-0.7817	-4.1336				-0.7566	-4.53462		-0.7566	-4.54462		-0.7566	-4.44129		-0.7566	-4.50684				-0.7635	-4.60642		-0.7635	-4.61642		-0.7635	-4.61642		-0.7635	-4.61309				-0.7689	-4.6103		-0.7689	-4.6203		-0.7689
	-0.7816	-4.13775		-0.7796	-4.13775		-0.7816	-4.13545		-0.7809	-4.13698				-0.7558	-4.54455		-0.7558	-4.55455		-0.7558	-4.44928		-0.7558	-4.51612				-0.7627	-4.61798		-0.7627	-4.62798		-0.7627	-4.62798		-0.7627	-4.62465				-0.7681	-4.62197		-0.7681	-4.63197		-0.7681
	-0.7807	-4.1417		-0.7787	-4.1417		-0.7807	-4.1394		-0.78	-4.14094				-0.7549	-4.55549		-0.7549	-4.56549		-0.7549	-4.45805		-0.7549	-4.52634				-0.7619	-4.6293		-0.7619	-4.6393		-0.7619	-4.6393		-0.7619	-4.63597				-0.7673	-4.6332		-0.7673	-4.6432		-0.7673
	-0.7799	-4.14618		-0.7779	-4.14618		-0.7799	-4.14388		-0.7792	-4.14541				-0.7541	-4.56543		-0.7541	-4.57543		-0.7541	-4.46597		-0.7541	-4.53561				-0.7611	-4.63979		-0.7611	-4.64979		-0.7611	-4.64979		-0.7611	-4.64645				-0.7664	-4.64436		-0.7664	-4.65436		-0.7664
	-0.7791	-4.15089		-0.7771	-4.15089		-0.7791	-4.14859		-0.7784	-4.15012				-0.7533	-4.57577		-0.7533	-4.58577		-0.7533	-4.47418		-0.7533	-4.54524				-0.7602	-4.65189		-0.7602	-4.66189		-0.7602	-4.66189		-0.7602	-4.65856				-0.7656	-4.6558		-0.7656	-4.6658		-0.7656
	-0.7782	-4.15614		-0.7762	-4.15614		-0.7782	-4.15384		-0.7775	-4.15538				-0.7525	-4.58637		-0.7525	-4.59637		-0.7525	-4.48254		-0.7525	-4.55509				-0.7594	-4.66274		-0.7594	-4.67274		-0.7594	-4.67274		-0.7594	-4.66941				-0.7648	-4.66716		-0.7648	-4.67716		-0.7648
	-0.7774	-4.16153		-0.7754	-4.16153		-0.7774	-4.15923		-0.7767	-4.16076				-0.7516	-4.59877		-0.7516	-4.60877		-0.7516	-4.49228		-0.7516	-4.56661				-0.7586	-4.67387		-0.7586	-4.68387		-0.7586	-4.68387		-0.7586	-4.68054				-0.764	-4.67944		-0.764	-4.68944		-0.764
	-0.7766	-4.16679		-0.7746	-4.16679		-0.7766	-4.16449		-0.7759	-4.16602				-0.7508	-4.61083		-0.7508	-4.62083		-0.7508	-4.50169		-0.7508	-4.57779				-0.7577	-4.68909		-0.7577	-4.69909		-0.7577	-4.69909		-0.7577	-4.69576				-0.7631	-4.6925		-0.7631	-4.7025		-0.7631
	-0.7758	-4.1725		-0.7738	-4.1725		-0.7758	-4.1702		-0.7751	-4.17173				-0.75	-4.62178		-0.75	-4.63178		-0.75	-4.51018		-0.75	-4.58792				-0.7569	-4.70049		-0.7569	-4.71049		-0.7569	-4.71049		-0.7569	-4.70716				-0.7623	-4.70597		-0.7623	-4.71597		-0.7623
	-0.7749	-4.17783		-0.7729	-4.17783		-0.7749	-4.17553		-0.7742	-4.17707				-0.7492	-4.63601		-0.7492	-4.64601		-0.7492	-4.52115		-0.7492	-4.60106				-0.7561	-4.71265		-0.7561	-4.72265		-0.7561	-4.72265		-0.7561	-4.71931				-0.7615	-4.71806		-0.7615	-4.72806		-0.7615
	-0.7741	-4.18363		-0.7721	-4.18363		-0.7741	-4.18133		-0.7734	-4.18286				-0.7483	-4.64956		-0.7483	-4.65956		-0.7483	-4.5315		-0.7483	-4.61354				-0.7552	-4.72909		-0.7552	-4.73909		-0.7552	-4.73909		-0.7552	-4.73576				-0.7606	-4.73189		-0.7606	-4.74189		-0.7606
	-0.7733	-4.18903		-0.7713	-4.18903		-0.7733	-4.18673		-0.7726	-4.18826				-0.7475	-4.66134		-0.7475	-4.67134		-0.7475	-4.54046		-0.7475	-4.62438				-0.7544	-4.74232		-0.7544	-4.75232		-0.7544	-4.75232		-0.7544	-4.74899				-0.7598	-4.74666		-0.7598	-4.75666		-0.7598
	-0.7725	-4.1947		-0.7705	-4.1947		-0.7725	-4.1924		-0.7718	-4.19394				-0.7467	-4.6751		-0.7467	-4.6851		-0.7467	-4.55083		-0.7467	-4.63701				-0.7536	-4.75647		-0.7536	-4.76647		-0.7536	-4.76647		-0.7536	-4.76313				-0.759	-4.76145		-0.759	-4.77145		-0.759
	-0.7716	-4.20025		-0.7696	-4.20025		-0.7716	-4.19795		-0.7709	-4.19948				-0.7458	-4.69165		-0.7458	-4.70165		-0.7458	-4.5632		-0.7458	-4.65217				-0.7528	-4.7716		-0.7528	-4.7816		-0.7528	-4.7816		-0.7528	-4.77827				-0.7582	-4.77702		-0.7582	-4.78702		-0.7582
	-0.7708	-4.20593		-0.7688	-4.20593		-0.7708	-4.20363		-0.7701	-4.20516				-0.745	-4.70399		-0.745	-4.71399		-0.745	-4.57235		-0.745	-4.66345				-0.7519	-4.78675		-0.7519	-4.79675		-0.7519	-4.79675		-0.7519	-4.79341				-0.7573	-4.7929		-0.7573	-4.8029		-0.7573
	-0.77	-4.21127		-0.768	-4.21127		-0.77	-4.20897		-0.7693	-4.2105				-0.7442	-4.72148		-0.7442	-4.73148		-0.7442	-4.58519		-0.7442	-4.67938				-0.7511	-4.80549		-0.7511	-4.81549		-0.7511	-4.81549		-0.7511	-4.81215				-0.7565	-4.81163		-0.7565	-4.82163		-0.7565
	-0.7691	-4.21703		-0.7671	-4.21703		-0.7691	-4.21473		-0.7684	-4.21626				-0.7434	-4.73707		-0.7434	-4.74707		-0.7434	-4.59654		-0.7434	-4.69356				-0.7503	-4.82131		-0.7503	-4.83131		-0.7503	-4.83131		-0.7503	-4.82798				-0.7556	-4.82478		-0.7556	-4.83478		-0.7556
	-0.7683	-4.22243		-0.7663	-4.22243		-0.7683	-4.22013		-0.7676	-4.22166				-0.7425	-4.75424		-0.7425	-4.76424		-0.7425	-4.60889		-0.7425	-4.70912				-0.7494	-4.84013		-0.7494	-4.85013		-0.7494	-4.85013		-0.7494	-4.8468				-0.7548	-4.8471		-0.7548	-4.8571		-0.7548
	-0.7675	-4.22812		-0.7655	-4.22812		-0.7675	-4.22582		-0.7668	-4.22735				-0.7417	-4.7716		-0.7417	-4.7816		-0.7417	-4.62124		-0.7417	-4.72481				-0.7486	-4.85981		-0.7486	-4.86981		-0.7486	-4.86981		-0.7486	-4.86647				-0.754	-4.86328		-0.754	-4.87328		-0.754
	-0.7666	-4.23374		-0.7646	-4.23374		-0.7666	-4.23144		-0.7659	-4.23297				-0.7409	-4.79156		-0.7409	-4.80156		-0.7409	-4.63526		-0.7409	-4.74279				-0.7478	-4.87648		-0.7478	-4.88648		-0.7478	-4.88648		-0.7478	-4.88314				-0.7532	-4.88174		-0.7532	-4.89174		-0.7532
	-0.7658	-4.23965		-0.7638	-4.23965		-0.7658	-4.23735		-0.7651	-4.23889				-0.74	-4.80827		-0.74	-4.81827		-0.74	-4.64685		-0.74	-4.7578				-0.747	-4.89963		-0.747	-4.90963		-0.747	-4.90963		-0.747	-4.9063				-0.7523	-4.90483		-0.7523	-4.91483		-0.7523
	-0.765	-4.24535		-0.763	-4.24535		-0.765	-4.24305		-0.7643	-4.24458				-0.7392	-4.83209		-0.7392	-4.84209		-0.7392	-4.66314		-0.7392	-4.77911				-0.7461	-4.92082		-0.7461	-4.93082		-0.7461	-4.93082		-0.7461	-4.92749				-0.7515	-4.92628		-0.7515	-4.93628		-0.7515
	-0.7642	-4.25111		-0.7622	-4.25111		-0.7642	-4.24881		-0.7635	-4.25035				-0.7384	-4.85356		-0.7384	-4.86356		-0.7384	-4.67757		-0.7384	-4.79823				-0.7453	-4.9431		-0.7453	-4.9531		-0.7453	-4.9531		-0.7453	-4.94976				-0.7507	-4.95039		-0.7507	-4.96039		-0.7507
	-0.7633	-4.25759		-0.7613	-4.25759		-0.7633	-4.25529		-0.7626	-4.25682				-0.7375	-4.87615		-0.7375	-4.88615		-0.7375	-4.6925		-0.7375	-4.81827				-0.7445	-4.969		-0.7445	-4.979		-0.7445	-4.979		-0.7445	-4.97566				-0.7498	-4.97306		-0.7498	-4.98306		-0.7498
	-0.7625	-4.26496		-0.7605	-4.26496		-0.7625	-4.26266		-0.7618	-4.26419				-0.7367	-4.89928		-0.7367	-4.90928		-0.7367	-4.70752		-0.7367	-4.8387				-0.7436	-4.99568		-0.7436	-5.00568		-0.7436	-5.00568		-0.7436	-5.00235				-0.749	-4.9974		-0.749	-5.0074		-0.749
	-0.7617	-4.27246		-0.7597	-4.27246		-0.7617	-4.27016		-0.761	-4.27169				-0.7359	-4.92812		-0.7359	-4.93812		-0.7359	-4.72584		-0.7359	-4.86403				-0.7428	-5.02494		-0.7428	-5.03494		-0.7428	-5.03494		-0.7428	-5.0316				-0.7482	-5.0284		-0.7482	-5.0384		-0.7482
	-0.7608	-4.28059		-0.7588	-4.28059		-0.7608	-4.27829		-0.7601	-4.27982				-0.7351	-4.95624		-0.7351	-4.96624		-0.7351	-4.74328		-0.7351	-4.88859				-0.742	-5.05394		-0.742	-5.06394		-0.742	-5.06394		-0.742	-5.06061				-0.7474	-5.06344		-0.7474	-5.07344		-0.7474
	-0.76	-4.2871		-0.758	-4.2871		-0.76	-4.2848		-0.7593	-4.28633				-0.7342	-4.98464		-0.7342	-4.99464		-0.7342	-4.76045		-0.7342	-4.91324				-0.7411	-5.08725		-0.7411	-5.09725		-0.7411	-5.09725		-0.7411	-5.09391				-0.7465	-5.09329		-0.7465	-5.10329		-0.7465
	-0.7592	-4.29576		-0.7572	-4.29576		-0.7592	-4.29346		-0.7585	-4.295				-0.7334	-5.02109		-0.7334	-5.03109		-0.7334	-4.78183		-0.7334	-4.94467				-0.7403	-5.12621		-0.7403	-5.13621		-0.7403	-5.13621		-0.7403	-5.13288				-0.7457	-5.1293		-0.7457	-5.1393		-0.7457
	-0.7583	-4.30364		-0.7563	-4.30364		-0.7583	-4.30134		-0.7576	-4.30288				-0.7326	-5.05443		-0.7326	-5.06443		-0.7326	-4.80074		-0.7326	-4.9732				-0.7395	-5.16724		-0.7395	-5.17724		-0.7395	-5.17724		-0.7395	-5.1739				-0.7449	-5.16622		-0.7449	-5.17622		-0.7449
	-0.7575	-4.31274		-0.7555	-4.31274		-0.7575	-4.31044		-0.7568	-4.31197				-0.7317	-5.09794		-0.7317	-5.10794		-0.7317	-4.82446		-0.7317	-5.01011				-0.7386	-5.21084		-0.7386	-5.22084		-0.7386	-5.22084		-0.7386	-5.21751				-0.744	-5.21796		-0.744	-5.22796		-0.744
	-0.7567	-4.32221		-0.7547	-4.32221		-0.7567	-4.31991		-0.756	-4.32144				-0.7309	-5.14807		-0.7309	-5.15807		-0.7309	-4.85044		-0.7309	-5.05219				-0.7378	-5.25641		-0.7378	-5.26641		-0.7378	-5.26641		-0.7378	-5.26308				-0.7432	-5.26138		-0.7432	-5.27138		-0.7432
	-0.7559	-4.33152		-0.7539	-4.33152		-0.7559	-4.32922		-0.7552	-4.33075				-0.7301	-5.19477		-0.7301	-5.20477		-0.7301	-4.87335		-0.7301	-5.09096				-0.737	-5.31042		-0.737	-5.32042		-0.737	-5.32042		-0.737	-5.31709				-0.7424	-5.32221		-0.7424	-5.33221		-0.7424
	-0.755	-4.34151		-0.753	-4.34151		-0.755	-4.33921		-0.7543	-4.34074				-0.7292	-5.25532		-0.7292	-5.26532		-0.7292	-4.90118		-0.7292	-5.14061				-0.7362	-5.37561		-0.7362	-5.38561		-0.7362	-5.38561		-0.7362	-5.38228				-0.7415	-5.38934		-0.7415	-5.39934		-0.7415
	-0.7542	-4.35125		-0.7522	-4.35125		-0.7542	-4.34895		-0.7535	-4.35048				-0.7284	-5.31623		-0.7284	-5.32623		-0.7284	-4.92709		-0.7284	-5.18985				-0.7353	-5.4593		-0.7353	-5.4693		-0.7353	-5.4693		-0.7353	-5.46596				-0.7407	-5.46763		-0.7407	-5.47763		-0.7407
	-0.7534	-4.36051		-0.7514	-4.36051		-0.7534	-4.35821		-0.7527	-4.35975				-0.7276	-5.40165		-0.7276	-5.41165		-0.7276	-4.95995		-0.7276	-5.25775				-0.7345	-5.56019		-0.7345	-5.57019		-0.7345	-5.57019		-0.7345	-5.56686				-0.7399	-5.58269		-0.7399	-5.59269		-0.7399
	-0.7525	-4.37008		-0.7505	-4.37008		-0.7525	-4.36778		-0.7518	-4.36931				-0.7267	-5.51713		-0.7267	-5.52713		-0.7267	-4.99827		-0.7267	-5.34751				-0.7337	-5.7018		-0.7337	-5.7118		-0.7337	-5.7118		-0.7337	-5.70847				-0.7391	-5.7029		-0.7391	-5.7129		-0.7391
	-0.7517	-4.37893		-0.7497	-4.37893		-0.7517	-4.37663		-0.751	-4.37816				-0.7259	-5.66635		-0.7259	-5.67635		-0.7259	-5.03829		-0.7259	-5.46033				-0.7328	-5.88207		-0.7328	-5.89207		-0.7328	-5.89207		-0.7328	-5.88873				-0.7382	-5.88008		-0.7382	-5.89008		-0.7382
	-0.7509	-4.38945		-0.7489	-4.38945		-0.7509	-4.38715		-0.7502	-4.38868				-0.7251	-5.89654		-0.7251	-5.90654		-0.7251	-5.08255		-0.7251	-5.62854				-0.732	-6.42331		-0.732	-6.43331		-0.732	-6.43331		-0.732	-6.42998				-0.7374	-6.37304		-0.7374	-6.38304		-0.7374
	-0.75	-4.40143		-0.748	-4.40143		-0.75	-4.39913		-0.7493	-4.40066				-0.7243	-6.69919		-0.7243	-6.70919		-0.7243	-5.14267		-0.7243	-6.18368				-0.7312	-6.48585		-0.7312	-6.49585		-0.7312	-6.49585		-0.7312	-6.49252				-0.7366	-6.43985		-0.7366	-6.44985		-0.7366
	-0.7492	-4.4133		-0.7472	-4.4133		-0.7492	-4.411		-0.7485	-4.41253				-0.7234	-6.18682		-0.7234	-6.19682		-0.7234	-5.11632		-0.7234	-5.83332				-0.7304	-5.91793		-0.7304	-5.92793		-0.7304	-5.92793		-0.7304	-5.9246				-0.7357	-5.90728		-0.7357	-5.91728		-0.7357
	-0.7484	-4.42666		-0.7464	-4.42666		-0.7484	-4.42436		-0.7477	-4.4259				-0.7226	-5.77211		-0.7226	-5.78211		-0.7226	-5.06098		-0.7226	-5.5384				-0.7295	-5.68361		-0.7295	-5.69361		-0.7295	-5.69361		-0.7295	-5.69028				-0.7349	-5.72193		-0.7349	-5.73193		-0.7349
	-0.7475	-4.4395		-0.7455	-4.4395		-0.7475	-4.4372		-0.7468	-4.43873				-0.7218	-5.56035		-0.7218	-5.57035		-0.7218	-5.01091		-0.7218	-5.38054				-0.7287	-5.53387		-0.7287	-5.54387		-0.7287	-5.54387		-0.7287	-5.54054				-0.7341	-5.55207		-0.7341	-5.56207		-0.7341
	-0.7467	-4.45407		-0.7447	-4.45407		-0.7467	-4.45177		-0.746	-4.45331				-0.721	-5.42794		-0.721	-5.43794		-0.721	-4.96928		-0.721	-5.27839				-0.7278	-5.41816		-0.7278	-5.42816		-0.7278	-5.42816		-0.7278	-5.42483				-0.7332	-5.41386		-0.7332	-5.42386		-0.7332
	-0.7459	-4.47057		-0.7439	-4.47057		-0.7459	-4.46827		-0.7452	-4.4698				-0.7201	-5.31274		-0.7201	-5.32274		-0.7201	-4.92566		-0.7201	-5.18705				-0.727	-5.31921		-0.727	-5.32921		-0.727	-5.32921		-0.727	-5.32588				-0.7324	-5.32624		-0.7324	-5.33624		-0.7324
	-0.7451	-4.48758		-0.7431	-4.48758		-0.7451	-4.48528		-0.7444	-4.48682				-0.7193	-5.21896		-0.7193	-5.22896		-0.7193	-4.88472		-0.7193	-5.11088				-0.7262	-5.23538		-0.7262	-5.24538		-0.7262	-5.24538		-0.7262	-5.24204				-0.7316	-5.2389		-0.7316	-5.2489		-0.7316
	-0.7442	-4.50668		-0.7422	-4.50668		-0.7442	-4.50438		-0.7435	-4.50591				-0.7184	-5.13978		-0.7184	-5.14978		-0.7184	-4.84625		-0.7184	-5.04527				-0.7254	-5.16021		-0.7254	-5.17021		-0.7254	-5.17021		-0.7254	-5.16687				-0.7308	-5.1666		-0.7308	-5.1766		-0.7308
	-0.7434	-4.52812		-0.7414	-4.52812		-0.7434	-4.52582		-0.7427	-4.52736				-0.7176	-5.07608		-0.7176	-5.08608		-0.7176	-4.81268		-0.7176	-4.99161				-0.7245	-5.09778		-0.7245	-5.10778		-0.7245	-5.10778		-0.7245	-5.10445				-0.7299	-5.10309		-0.7299	-5.11309		-0.7299
	-0.7426	-4.54944		-0.7406	-4.54944		-0.7426	-4.54714		-0.7419	-4.54868				-0.7168	-5.01291		-0.7168	-5.02291		-0.7168	-4.7771		-0.7168	-4.93764				-0.7237	-5.03692		-0.7237	-5.04692		-0.7237	-5.04692		-0.7237	-5.04359				-0.7291	-5.04163		-0.7291	-5.05163		-0.7291
	-0.7417	-4.57365		-0.7397	-4.57365		-0.7417	-4.57135		-0.741	-4.57288				-0.716	-4.95311		-0.716	-4.96311		-0.716	-4.74136		-0.716	-4.88586				-0.7229	-4.98422		-0.7229	-4.99422		-0.7229	-4.99422		-0.7229	-4.99089				-0.7283	-4.9859		-0.7283	-4.9959		-0.7283
	-0.7409	-4.59929		-0.7389	-4.59929		-0.7409	-4.59699		-0.7402	-4.59852				-0.7151	-4.90309		-0.7151	-4.91309		-0.7151	-4.70997		-0.7151	-4.84205				-0.7221	-4.93144		-0.7221	-4.94144		-0.7221	-4.94144		-0.7221	-4.93811				-0.7274	-4.93817		-0.7274	-4.94817		-0.7274
	-0.7401	-4.6269		-0.7381	-4.6269		-0.7401	-4.6246		-0.7394	-4.62614				-0.7143	-4.85418		-0.7143	-4.86418		-0.7143	-4.67799		-0.7143	-4.79878				-0.7212	-4.88273		-0.7212	-4.89273		-0.7212	-4.89273		-0.7212	-4.8894				-0.7266	-4.88639		-0.7266	-4.89639		-0.7266
	-0.7393	-4.65916		-0.7373	-4.65916		-0.7393	-4.65686		-0.7386	-4.65839				-0.7135	-4.81051		-0.7135	-4.82051		-0.7135	-4.6484		-0.7135	-4.75981				-0.7204	-4.83803		-0.7204	-4.84803		-0.7204	-4.84803		-0.7204	-4.8447				-0.7258	-4.84375		-0.7258	-4.85375		-0.7258
	-0.7384	-4.69315		-0.7364	-4.69315		-0.7384	-4.69085		-0.7377	-4.69238				-0.7127	-4.76828		-0.7127	-4.77828		-0.7127	-4.61888		-0.7127	-4.72181				-0.7196	-4.7997		-0.7196	-4.8097		-0.7196	-4.8097		-0.7196	-4.80636				-0.7249	-4.7997		-0.7249	-4.8097		-0.7249
	-0.7376	-4.73283		-0.7356	-4.73283		-0.7376	-4.73053		-0.7369	-4.73206				-0.7118	-4.72469		-0.7118	-4.73469		-0.7118	-4.58754		-0.7118	-4.68231				-0.7187	-4.75721		-0.7187	-4.76721		-0.7187	-4.76721		-0.7187	-4.76388				-0.7241	-4.76095		-0.7241	-4.77095		-0.7241
	-0.7368	-4.77521		-0.7348	-4.77521		-0.7368	-4.77291		-0.7361	-4.77444				-0.711	-4.68782		-0.711	-4.69782		-0.711	-4.56035		-0.711	-4.64867				-0.7179	-4.72033		-0.7179	-4.73033		-0.7179	-4.73033		-0.7179	-4.727				-0.7233	-4.71942		-0.7233	-4.72942		-0.7233
	-0.7359	-4.82333		-0.7339	-4.82333		-0.7359	-4.82103		-0.7352	-4.82256				-0.7102	-4.6515		-0.7102	-4.6615		-0.7102	-4.53298		-0.7102	-4.61533				-0.7171	-4.6811		-0.7171	-4.6911		-0.7171	-4.6911		-0.7171	-4.68777				-0.7225	-4.6834		-0.7225	-4.6934		-0.7225
	-0.7351	-4.87976		-0.7331	-4.87976		-0.7351	-4.87746		-0.7344	-4.87899				-0.7093	-4.61368		-0.7093	-4.62368		-0.7093	-4.5039		-0.7093	-4.58042				-0.7162	-4.64782		-0.7162	-4.65782		-0.7162	-4.65782		-0.7162	-4.65448				-0.7216	-4.64493		-0.7216	-4.65493		-0.7216
	-0.7343	-4.9393		-0.7323	-4.9393		-0.7343	-4.937		-0.7336	-4.93854				-0.7085	-4.58071		-0.7085	-4.59071		-0.7085	-4.47808		-0.7085	-4.54983				-0.7154	-4.61261		-0.7154	-4.62261		-0.7154	-4.62261		-0.7154	-4.61928				-0.7208	-4.61119		-0.7208	-4.62119		-0.7208
	-0.7334	-5.01233		-0.7314	-5.01233		-0.7334	-5.01003		-0.7327	-5.01157				-0.7076	-4.54592		-0.7076	-4.55592		-0.7076	-4.45038		-0.7076	-4.51741				-0.7146	-4.57774		-0.7146	-4.58774		-0.7146	-4.58774		-0.7146	-4.58441				-0.72	-4.5779		-0.72	-4.5879		-0.72
	-0.7326	-5.10018		-0.7306	-5.10018		-0.7326	-5.09788		-0.7319	-5.09941				-0.7068	-4.51414		-0.7068	-4.52414		-0.7068	-4.4247		-0.7068	-4.48766				-0.7137	-4.54729		-0.7137	-4.55729		-0.7137	-4.55729		-0.7137	-4.55396				-0.7191	-4.5447		-0.7191	-4.5547		-0.7191
	-0.7318	-5.20986		-0.7298	-5.20986		-0.7318	-5.20756		-0.7311	-5.20909				-0.706	-4.48267		-0.706	-4.49267		-0.706	-4.39892		-0.706	-4.45809				-0.7129	-4.5157		-0.7129	-4.5257		-0.7129	-4.5257		-0.7129	-4.52237				-0.7183	-4.51187		-0.7183	-4.52187		-0.7183
	-0.731	-5.35803		-0.729	-5.35803		-0.731	-5.35573		-0.7303	-5.35726				-0.7052	-4.45223		-0.7052	-4.46223		-0.7052	-4.37366		-0.7052	-4.42937				-0.7121	-4.48439		-0.7121	-4.49439		-0.7121	-4.49439		-0.7121	-4.49106				-0.7175	-4.48201		-0.7175	-4.49201		-0.7175
	-0.7301	-5.58004		-0.7281	-5.58004		-0.7301	-5.57774		-0.7294	-5.57928				-0.7043	-4.42125		-0.7043	-4.43125		-0.7043	-4.34766		-0.7043	-4.40005				-0.7113	-4.45544		-0.7113	-4.46544		-0.7113	-4.46544		-0.7113	-4.4621				-0.7166	-4.45149		-0.7166	-4.46149		-0.7166
	-0.7293	-6.09216		-0.7273	-6.09216		-0.7293	-6.08986		-0.7286	-6.09139				-0.7035	-4.39222		-0.7035	-4.40222		-0.7035	-4.32303		-0.7035	-4.37249				-0.7104	-4.42608		-0.7104	-4.43608		-0.7104	-4.43608		-0.7104	-4.43275				-0.7158	-4.42331		-0.7158	-4.43331		-0.7158
	-0.7285	-5.97964		-0.7265	-5.97964		-0.7285	-5.97734		-0.7278	-5.97887				-0.7027	-4.36331		-0.7027	-4.37331		-0.7027	-4.29826		-0.7027	-4.34496				-0.7096	-4.39805		-0.7096	-4.40805		-0.7096	-4.40805		-0.7096	-4.40472				-0.715	-4.39426		-0.715	-4.40426		-0.715
	-0.7276	-5.66015		-0.7256	-5.66015		-0.7276	-5.65785		-0.7269	-5.65938				-0.7018	-4.33536		-0.7018	-4.34536		-0.7018	-4.27409		-0.7018	-4.31827				-0.7088	-4.3711		-0.7088	-4.3811		-0.7088	-4.3811		-0.7088	-4.37777				-0.7141	-4.36694		-0.7141	-4.37694		-0.7141
	-0.7268	-5.32166		-0.7248	-5.32166		-0.7268	-5.31936		-0.7261	-5.3209				-0.701	-4.30759		-0.701	-4.31759		-0.701	-4.24988		-0.701	-4.29169				-0.7079	-4.34361		-0.7079	-4.35361		-0.7079	-4.35361		-0.7079	-4.35028				-0.7133	-4.33942		-0.7133	-4.34942		-0.7133
	-0.726	-5.18131		-0.724	-5.18131		-0.726	-5.17901		-0.7253	-5.18055				-0.7002	-4.28117		-0.7002	-4.29117		-0.7002	-4.22665		-0.7002	-4.26633				-0.7071	-4.31795		-0.7071	-4.32795		-0.7071	-4.32795		-0.7071	-4.32461				-0.7125	-4.31372		-0.7125	-4.32372		-0.7125
	-0.7252	-5.07433		-0.7232	-5.07433		-0.7252	-5.07203		-0.7245	-5.07356				-0.6994	-4.25446		-0.6994	-4.26446		-0.6994	-4.20301		-0.6994	-4.24064				-0.7063	-4.29175		-0.7063	-4.30175		-0.7063	-4.30175		-0.7063	-4.29842				-0.7117	-4.2871		-0.7117	-4.2971		-0.7117
	-0.7243	-4.9859		-0.7223	-4.9859		-0.7243	-4.9836		-0.7236	-4.98513				-0.6985	-4.22871		-0.6985	-4.23871		-0.6985	-4.18006		-0.6985	-4.21582				-0.7055	-4.26672		-0.7055	-4.27672		-0.7055	-4.27672		-0.7055	-4.27339				-0.7108	-4.26281		-0.7108	-4.27281		-0.7108
	-0.7235	-4.91328		-0.7215	-4.91328		-0.7235	-4.91098		-0.7228	-4.91252				-0.6977	-4.2035		-0.6977	-4.2135		-0.6977	-4.15745		-0.6977	-4.19148				-0.7046	-4.24192		-0.7046	-4.25192		-0.7046	-4.25192		-0.7046	-4.24859				-0.71	-4.23815		-0.71	-4.24815		-0.71
	-0.7227	-4.84986		-0.7207	-4.84986		-0.7227	-4.84756		-0.722	-4.84909				-0.6969	-4.17816		-0.6969	-4.18816		-0.6969	-4.1346		-0.6969	-4.16697				-0.7038	-4.21853		-0.7038	-4.22853		-0.7038	-4.22853		-0.7038	-4.2252				-0.7092	-4.21431		-0.7092	-4.22431		-0.7092
	-0.7218	-4.79398		-0.7198	-4.79398		-0.7218	-4.79168		-0.7211	-4.79322				-0.6961	-4.1541		-0.6961	-4.1641		-0.6961	-4.11278		-0.6961	-4.14366				-0.703	-4.19484		-0.703	-4.20484		-0.703	-4.20484		-0.703	-4.20151				-0.7084	-4.19098		-0.7084	-4.20098		-0.7084
	-0.721	-4.74232		-0.719	-4.74232		-0.721	-4.74002		-0.7203	-4.74155				-0.6952	-4.12954		-0.6952	-4.13954		-0.6952	-4.09039		-0.6952	-4.11982				-0.7021	-4.17192		-0.7021	-4.18192		-0.7021	-4.18192		-0.7021	-4.17859				-0.7075	-4.16749		-0.7075	-4.17749		-0.7075
	-0.7202	-4.69422		-0.7182	-4.69422		-0.7202	-4.69192		-0.7195	-4.69345				-0.6944	-4.10574		-0.6944	-4.11574		-0.6944	-4.06859		-0.6944	-4.09669				-0.7013	-4.14942		-0.7013	-4.15942		-0.7013	-4.15942		-0.7013	-4.15608				-0.7067	-4.14588		-0.7067	-4.15588		-0.7067
	-0.7193	-4.6515		-0.7173	-4.6515		-0.7193	-4.6492		-0.7186	-4.65073				-0.6936	-4.08297		-0.6936	-4.09297		-0.6936	-4.04764		-0.6936	-4.07453				-0.7005	-4.1279		-0.7005	-4.1379		-0.7005	-4.1379		-0.7005	-4.13457				-0.7059	-4.12401		-0.7059	-4.13401		-0.7059
	-0.7185	-4.6119		-0.7165	-4.6119		-0.7185	-4.6096		-0.7178	-4.61113				-0.6927	-4.06013		-0.6927	-4.07013		-0.6927	-4.02655		-0.6927	-4.05227				-0.6996	-4.10607		-0.6996	-4.11607		-0.6996	-4.11607		-0.6996	-4.11274				-0.705	-4.10204		-0.705	-4.11204		-0.705
	-0.7177	-4.57365		-0.7157	-4.57365		-0.7177	-4.57135		-0.717	-4.57288				-0.6919	-4.03773		-0.6919	-4.04773		-0.6919	-4.00577		-0.6919	-4.03041				-0.6988	-4.08492		-0.6988	-4.09492		-0.6988	-4.09492		-0.6988	-4.09158				-0.7042	-4.08134		-0.7042	-4.09134		-0.7042
	-0.7168	-4.53865		-0.7148	-4.53865		-0.7168	-4.53635		-0.7161	-4.53788				-0.6911	-4.01543		-0.6911	-4.02543		-0.6911	-3.98502		-0.6911	-4.00862				-0.698	-4.06409		-0.698	-4.07409		-0.698	-4.07409		-0.698	-4.07076				-0.7034	-4.06023		-0.7034	-4.07023		-0.7034
	-0.716	-4.50501		-0.714	-4.50501		-0.716	-4.50271		-0.7153	-4.50424				-0.6902	-3.99311		-0.6902	-4.00311		-0.6902	-3.96417		-0.6902	-3.98679				-0.6971	-4.04369		-0.6971	-4.05369		-0.6971	-4.05369		-0.6971	-4.05035				-0.7025	-4.04001		-0.7025	-4.05001		-0.7025
	-0.7152	-4.47444		-0.7132	-4.47444		-0.7152	-4.47214		-0.7145	-4.47367				-0.6894	-3.97224		-0.6894	-3.98224		-0.6894	-3.94462		-0.6894	-3.96637				-0.6963	-4.0236		-0.6963	-4.0336		-0.6963	-4.0336		-0.6963	-4.03027				-0.7017	-4.02041		-0.7017	-4.03041		-0.7017
	-0.7144	-4.44515		-0.7124	-4.44515		-0.7144	-4.44285		-0.7137	-4.44438				-0.6886	-3.95156		-0.6886	-3.96156		-0.6886	-3.92518		-0.6886	-3.9461				-0.6955	-4.00406		-0.6955	-4.01406		-0.6955	-4.01406		-0.6955	-4.01072				-0.7009	-4.00035		-0.7009	-4.01035		-0.7009
	-0.7135	-4.41646		-0.7115	-4.41646		-0.7135	-4.41416		-0.7128	-4.41569				-0.6877	-3.9307		-0.6877	-3.9407		-0.6877	-3.90553		-0.6877	-3.92564				-0.6947	-3.98464		-0.6947	-3.99464		-0.6947	-3.99464		-0.6947	-3.99131				-0.7001	-3.98088		-0.7001	-3.99088		-0.7001
	-0.7127	-4.38987		-0.7107	-4.38987		-0.7127	-4.38757		-0.712	-4.38911				-0.6869	-3.9108		-0.6869	-3.9208		-0.6869	-3.88673		-0.6869	-3.90611				-0.6938	-3.96617		-0.6938	-3.97617		-0.6938	-3.97617		-0.6938	-3.97284				-0.6992	-3.96178		-0.6992	-3.97178		-0.6992
	-0.7119	-4.36411		-0.7099	-4.36411		-0.7119	-4.36181		-0.7112	-4.36335				-0.6861	-3.89076		-0.6861	-3.90076		-0.6861	-3.86774		-0.6861	-3.88642				-0.693	-3.94731		-0.693	-3.95731		-0.693	-3.95731		-0.693	-3.95397				-0.6984	-3.94348		-0.6984	-3.95348		-0.6984
	-0.711	-4.33857		-0.709	-4.33857		-0.711	-4.33627		-0.7103	-4.3378				-0.6852	-3.8716		-0.6852	-3.8816		-0.6852	-3.84955		-0.6852	-3.86758				-0.6922	-3.92885		-0.6922	-3.93885		-0.6922	-3.93885		-0.6922	-3.93552				-0.6976	-3.92518		-0.6976	-3.93518		-0.6976
	-0.7102	-4.31354		-0.7082	-4.31354		-0.7102	-4.31124		-0.7095	-4.31278				-0.6844	-3.85263		-0.6844	-3.86263		-0.6844	-3.8315		-0.6844	-3.84892				-0.6913	-3.9108		-0.6913	-3.9208		-0.6913	-3.9208		-0.6913	-3.91747				-0.6967	-3.90693		-0.6967	-3.91693		-0.6967
	-0.7094	-4.28861		-0.7074	-4.28861		-0.7094	-4.28631		-0.7087	-4.28785				-0.6836	-3.83387		-0.6836	-3.84387		-0.6836	-3.81361		-0.6836	-3.83045				-0.6905	-3.89313		-0.6905	-3.90313		-0.6905	-3.90313		-0.6905	-3.8998				-0.6959	-3.88941		-0.6959	-3.89941		-0.6959
	-0.7085	-4.26456		-0.7065	-4.26456		-0.7085	-4.26226		-0.7078	-4.26379				-0.6828	-3.81559		-0.6828	-3.82559		-0.6828	-3.79615		-0.6828	-3.81245				-0.6897	-3.87582		-0.6897	-3.88582		-0.6897	-3.88582		-0.6897	-3.88249				-0.6951	-3.8716		-0.6951	-3.8816		-0.6951
	-0.7077	-4.24056		-0.7057	-4.24056		-0.7077	-4.23826		-0.707	-4.23979				-0.6819	-3.79751		-0.6819	-3.80751		-0.6819	-3.77885		-0.6819	-3.79462				-0.6889	-3.85792		-0.6889	-3.86792		-0.6889	-3.86792		-0.6889	-3.86459				-0.6942	-3.85449		-0.6942	-3.86449		-0.6942
	-0.7069	-4.21796		-0.7049	-4.21796		-0.7069	-4.21566		-0.7062	-4.21719				-0.6811	-3.78042		-0.6811	-3.79042		-0.6811	-3.76246		-0.6811	-3.77776				-0.688	-3.84134		-0.688	-3.85134		-0.688	-3.85134		-0.688	-3.848				-0.6934	-3.83744		-0.6934	-3.84744		-0.6934
	-0.7061	-4.19532		-0.7041	-4.19532		-0.7061	-4.19302		-0.7054	-4.19455				-0.6803	-3.76346		-0.6803	-3.77346		-0.6803	-3.74618		-0.6803	-3.76103				-0.6872	-3.82478		-0.6872	-3.83478		-0.6872	-3.83478		-0.6872	-3.83144				-0.6926	-3.82045		-0.6926	-3.83045		-0.6926
	-0.7052	-4.17289		-0.7032	-4.17289		-0.7052	-4.17059		-0.7045	-4.17212				-0.6795	-3.74618		-0.6795	-3.75618		-0.6795	-3.72955		-0.6795	-3.74397				-0.6864	-3.80827		-0.6864	-3.81827		-0.6864	-3.81827		-0.6864	-3.81494				-0.6917	-3.8041		-0.6917	-3.8141		-0.6917
	-0.7044	-4.15132		-0.7024	-4.15132		-0.7044	-4.14902		-0.7037	-4.15055				-0.6786	-3.72932		-0.6786	-3.73932		-0.6786	-3.71332		-0.6786	-3.72732				-0.6855	-3.7921		-0.6855	-3.8021		-0.6855	-3.8021		-0.6855	-3.79876				-0.6909	-3.78781		-0.6909	-3.79781		-0.6909
	-0.7036	-4.12995		-0.7016	-4.12995		-0.7036	-4.12765		-0.7029	-4.12918				-0.6778	-3.71309		-0.6778	-3.72309		-0.6778	-3.69767		-0.6778	-3.71129				-0.6847	-3.77599		-0.6847	-3.78599		-0.6847	-3.78599		-0.6847	-3.78265				-0.6901	-3.77186		-0.6901	-3.78186		-0.6901
	-0.7027	-4.10902		-0.7007	-4.10902		-0.7027	-4.10672		-0.702	-4.10825				-0.6769	-3.6968		-0.6769	-3.7068		-0.6769	-3.68194		-0.6769	-3.69518				-0.6839	-3.76045		-0.6839	-3.77045		-0.6839	-3.77045		-0.6839	-3.76712				-0.6892	-3.75597		-0.6892	-3.76597		-0.6892
	-0.7019	-4.08874		-0.6999	-4.08874		-0.7019	-4.08644		-0.7012	-4.08797				-0.6761	-3.68152		-0.6761	-3.69152		-0.6761	-3.66716		-0.6761	-3.68007				-0.683	-3.74497		-0.683	-3.75497		-0.683	-3.75497		-0.683	-3.75164				-0.6884	-3.74017		-0.6884	-3.75017		-0.6884
	-0.7011	-4.06803		-0.6991	-4.06803		-0.7011	-4.06573		-0.7004	-4.06727				-0.6753	-3.66575		-0.6753	-3.67575		-0.6753	-3.65189		-0.6753	-3.66446				-0.6822	-3.72909		-0.6822	-3.73909		-0.6822	-3.73909		-0.6822	-3.73576				-0.6876	-3.72423		-0.6876	-3.73423		-0.6876
	-0.7002	-4.04857		-0.6982	-4.04857		-0.7002	-4.04627		-0.6995	-4.0478				-0.6745	-3.65092		-0.6745	-3.66092		-0.6745	-3.63752		-0.6745	-3.64978				-0.6814	-3.71444		-0.6814	-3.72444		-0.6814	-3.72444		-0.6814	-3.72111				-0.6868	-3.70952		-0.6868	-3.71952		-0.6868
	-0.6994	-4.02896		-0.6974	-4.02896		-0.6994	-4.02666		-0.6987	-4.02819				-0.6736	-3.63582		-0.6736	-3.64582		-0.6736	-3.62288		-0.6736	-3.63484				-0.6805	-3.69962		-0.6805	-3.70962		-0.6805	-3.70962		-0.6805	-3.70629				-0.6859	-3.69465		-0.6859	-3.70465		-0.6859
	-0.6986	-4.00944		-0.6966	-4.00944		-0.6986	-4.00714		-0.6979	-4.00867				-0.6728	-3.62142		-0.6728	-3.63142		-0.6728	-3.60889		-0.6728	-3.62058				-0.6797	-3.68529		-0.6797	-3.69529		-0.6797	-3.69529		-0.6797	-3.69196				-0.6851	-3.68006		-0.6851	-3.69006		-0.6851
	-0.6978	-3.99012		-0.6958	-3.99012		-0.6978	-3.98782		-0.6971	-3.98936				-0.672	-3.60695		-0.672	-3.61695		-0.672	-3.59482		-0.672	-3.60624				-0.6789	-3.67142		-0.6789	-3.68142		-0.6789	-3.68142		-0.6789	-3.67808				-0.6843	-3.66555		-0.6843	-3.67555		-0.6843
	-0.6969	-3.97062		-0.6949	-3.97062		-0.6969	-3.96832		-0.6962	-3.96985				-0.6712	-3.59278		-0.6712	-3.60278		-0.6712	-3.58104		-0.6712	-3.5922				-0.678	-3.65738		-0.678	-3.66738		-0.678	-3.66738		-0.678	-3.66405				-0.6834	-3.6515		-0.6834	-3.6615		-0.6834
	-0.6961	-3.95156		-0.6941	-3.95156		-0.6961	-3.94926		-0.6954	-3.95079				-0.6703	-3.57905		-0.6703	-3.58905		-0.6703	-3.56767		-0.6703	-3.57859				-0.6772	-3.64378		-0.6772	-3.65378		-0.6772	-3.65378		-0.6772	-3.65045				-0.6826	-3.63808		-0.6826	-3.64808		-0.6826
	-0.6953	-3.93293		-0.6933	-3.93293		-0.6953	-3.93063		-0.6946	-3.93216				-0.6695	-3.56543		-0.6695	-3.57543		-0.6695	-3.5544		-0.6695	-3.56509				-0.6764	-3.63078		-0.6764	-3.64078		-0.6764	-3.64078		-0.6764	-3.63745				-0.6818	-3.62415		-0.6818	-3.63415		-0.6818
	-0.6944	-3.91435		-0.6924	-3.91435		-0.6944	-3.91205		-0.6937	-3.91359				-0.6687	-3.55176		-0.6687	-3.56176		-0.6687	-3.54106		-0.6687	-3.55153				-0.6756	-3.61762		-0.6756	-3.62762		-0.6756	-3.62762		-0.6756	-3.62429				-0.681	-3.61119		-0.681	-3.62119		-0.681
	-0.6936	-3.8962		-0.6916	-3.8962		-0.6936	-3.8939		-0.6929	-3.89543				-0.6678	-3.53835		-0.6678	-3.54835		-0.6678	-3.52798		-0.6678	-3.53823				-0.6747	-3.60467		-0.6747	-3.61467		-0.6747	-3.61467		-0.6747	-3.61134				-0.6801	-3.59808		-0.6801	-3.60808		-0.6801
	-0.6928	-3.87811		-0.6908	-3.87811		-0.6928	-3.87581		-0.6921	-3.87735				-0.667	-3.52549		-0.667	-3.53549		-0.667	-3.51542		-0.667	-3.52547				-0.6739	-3.5921		-0.6739	-3.6021		-0.6739	-3.6021		-0.6739	-3.59877				-0.6793	-3.58503		-0.6793	-3.59503		-0.6793
	-0.6919	-3.85981		-0.6899	-3.85981		-0.6919	-3.85751		-0.6912	-3.85904				-0.6662	-3.51244		-0.6662	-3.52244		-0.6662	-3.50266		-0.6662	-3.51251				-0.6731	-3.58021		-0.6731	-3.59021		-0.6731	-3.59021		-0.6731	-3.58688				-0.6785	-3.57268		-0.6785	-3.58268		-0.6785
	-0.6911	-3.84224		-0.6891	-3.84224		-0.6911	-3.83994		-0.6904	-3.84147				-0.6653	-3.50004		-0.6653	-3.51004		-0.6653	-3.49053		-0.6653	-3.5002				-0.6723	-3.56831		-0.6723	-3.57831		-0.6723	-3.57831		-0.6723	-3.57498				-0.6776	-3.56035		-0.6776	-3.57035		-0.6776
	-0.6903	-3.8242		-0.6883	-3.8242		-0.6903	-3.8219		-0.6896	-3.82343				-0.6645	-3.48732		-0.6645	-3.49732		-0.6645	-3.47808		-0.6645	-3.48757				-0.6714	-3.55596		-0.6714	-3.56596		-0.6714	-3.56596		-0.6714	-3.56262				-0.6768	-3.54852		-0.6768	-3.55852		-0.6768
	-0.6894	-3.80632		-0.6874	-3.80632		-0.6894	-3.80402		-0.6887	-3.80555				-0.6637	-3.47508		-0.6637	-3.48508		-0.6637	-3.4661		-0.6637	-3.47542				-0.6706	-3.5447		-0.6706	-3.5547		-0.6706	-3.5547		-0.6706	-3.55136				-0.676	-3.53685		-0.676	-3.54685		-0.676
	-0.6886	-3.78941		-0.6866	-3.78941		-0.6886	-3.78711		-0.6879	-3.78865				-0.6628	-3.46281		-0.6628	-3.47281		-0.6628	-3.45407		-0.6628	-3.46323				-0.6698	-3.53328		-0.6698	-3.54328		-0.6698	-3.54328		-0.6698	-3.53995				-0.6751	-3.52506		-0.6751	-3.53506		-0.6751
	-0.6878	-3.77211		-0.6858	-3.77211		-0.6878	-3.76981		-0.6871	-3.77135				-0.662	-3.45087		-0.662	-3.46087		-0.662	-3.44237		-0.662	-3.45137				-0.6689	-3.52273		-0.6689	-3.53273		-0.6689	-3.53273		-0.6689	-3.5294				-0.6743	-3.51371		-0.6743	-3.52371		-0.6743
	-0.687	-3.75473		-0.685	-3.75473		-0.687	-3.75243		-0.6863	-3.75397				-0.6612	-3.43926		-0.6612	-3.44926		-0.6612	-3.43098		-0.6612	-3.43983				-0.6681	-3.51215		-0.6681	-3.52215		-0.6681	-3.52215		-0.6681	-3.51882				-0.6735	-3.50252		-0.6735	-3.51252		-0.6735
	-0.6861	-3.73755		-0.6841	-3.73755		-0.6861	-3.73525		-0.6854	-3.73678				-0.6604	-3.42794		-0.6604	-3.43794		-0.6604	-3.41987		-0.6604	-3.42859				-0.6673	-3.50155		-0.6673	-3.51155		-0.6673	-3.51155		-0.6673	-3.50822				-0.6727	-3.49201		-0.6727	-3.50201		-0.6727
	-0.6853	-3.71988		-0.6833	-3.71988		-0.6853	-3.71758		-0.6846	-3.71911				-0.6595	-3.41669		-0.6595	-3.42669		-0.6595	-3.40882		-0.6595	-3.4174				-0.6664	-3.4916		-0.6664	-3.5016		-0.6664	-3.5016		-0.6664	-3.49827				-0.6718	-3.48162		-0.6718	-3.49162		-0.6718
	-0.6845	-3.70312		-0.6825	-3.70312		-0.6845	-3.70082		-0.6838	-3.70235				-0.6587	-3.4055		-0.6587	-3.4155		-0.6587	-3.39783		-0.6587	-3.40628				-0.6656	-3.48175		-0.6656	-3.49175		-0.6656	-3.49175		-0.6656	-3.48842				-0.671	-3.47121		-0.671	-3.48121		-0.671
	-0.6836	-3.68592		-0.6816	-3.68592		-0.6836	-3.68362		-0.6829	-3.68516				-0.6579	-3.39437		-0.6579	-3.40437		-0.6579	-3.3869		-0.6579	-3.39521				-0.6648	-3.47173		-0.6648	-3.48173		-0.6648	-3.48173		-0.6648	-3.47839				-0.6702	-3.46118		-0.6702	-3.47118		-0.6702
	-0.6828	-3.66878		-0.6808	-3.66878		-0.6828	-3.66648		-0.6821	-3.66801				-0.657	-3.38394		-0.657	-3.39394		-0.657	-3.37665		-0.657	-3.38485				-0.6639	-3.46243		-0.6639	-3.47243		-0.6639	-3.47243		-0.6639	-3.4691				-0.6693	-3.45149		-0.6693	-3.46149		-0.6693
	-0.682	-3.6517		-0.68	-3.6517		-0.682	-3.6494		-0.6813	-3.65093				-0.6562	-3.37335		-0.6562	-3.38335		-0.6562	-3.36623		-0.6562	-3.37431				-0.6631	-3.45309		-0.6631	-3.46309		-0.6631	-3.46309		-0.6631	-3.45975				-0.6685	-3.44177		-0.6685	-3.45177		-0.6685
	-0.6812	-3.63451		-0.6792	-3.63451		-0.6812	-3.63221		-0.6805	-3.63375				-0.6554	-3.36321		-0.6554	-3.37321		-0.6554	-3.35625		-0.6554	-3.36422				-0.6623	-3.4443		-0.6623	-3.4543		-0.6623	-3.4543		-0.6623	-3.45097				-0.6677	-3.43274		-0.6677	-3.44274		-0.6677
	-0.6803	-3.61762		-0.6783	-3.61762		-0.6803	-3.61532		-0.6796	-3.61686				-0.6546	-3.3533		-0.6546	-3.3633		-0.6546	-3.3465		-0.6546	-3.35437				-0.6615	-3.43581		-0.6615	-3.44581		-0.6615	-3.44581		-0.6615	-3.44247				-0.6668	-3.42354		-0.6668	-3.43354		-0.6668
	-0.6795	-3.60067		-0.6775	-3.60067		-0.6795	-3.59837		-0.6788	-3.59991				-0.6537	-3.34333		-0.6537	-3.35333		-0.6537	-3.33668		-0.6537	-3.34444				-0.6606	-3.42713		-0.6606	-3.43713		-0.6606	-3.43713		-0.6606	-3.4338				-0.666	-3.41465		-0.666	-3.42465		-0.666
	-0.6787	-3.58386		-0.6767	-3.58386		-0.6787	-3.58156		-0.678	-3.58309				-0.6529	-3.33358		-0.6529	-3.34358		-0.6529	-3.32707		-0.6529	-3.33474				-0.6598	-3.41896		-0.6598	-3.42896		-0.6598	-3.42896		-0.6598	-3.42563				-0.6652	-3.40594		-0.6652	-3.41594		-0.6652
	-0.6778	-3.56735		-0.6758	-3.56735		-0.6778	-3.56505		-0.6771	-3.56658				-0.6521	-3.32422		-0.6521	-3.33422		-0.6521	-3.31785		-0.6521	-3.32543				-0.659	-3.41061		-0.659	-3.42061		-0.659	-3.42061		-0.659	-3.41728				-0.6643	-3.3974		-0.6643	-3.4074		-0.6643
	-0.677	-3.55068		-0.675	-3.55068		-0.677	-3.54838		-0.6763	-3.54991				-0.6512	-3.31498		-0.6512	-3.32498		-0.6512	-3.30874		-0.6512	-3.31623				-0.6581	-3.40296		-0.6581	-3.41296		-0.6581	-3.41296		-0.6581	-3.40963				-0.6635	-3.38923		-0.6635	-3.39923		-0.6635
	-0.6762	-3.53462		-0.6742	-3.53462		-0.6762	-3.53232		-0.6755	-3.53385				-0.6504	-3.3061		-0.6504	-3.3161		-0.6504	-3.29999		-0.6504	-3.30739				-0.6573	-3.39534		-0.6573	-3.40534		-0.6573	-3.40534		-0.6573	-3.40201				-0.6627	-3.38112		-0.6627	-3.39112		-0.6627
	-0.6753	-3.51856		-0.6733	-3.51856		-0.6753	-3.51626		-0.6746	-3.51779				-0.6496	-3.29714		-0.6496	-3.30714		-0.6496	-3.29115		-0.6496	-3.29848				-0.6565	-3.38775		-0.6565	-3.39775		-0.6565	-3.39775		-0.6565	-3.39441				-0.6619	-3.37345		-0.6619	-3.38345		-0.6619
	-0.6745	-3.50252		-0.6725	-3.50252		-0.6745	-3.50022		-0.6738	-3.50175				-0.6487	-3.28853		-0.6487	-3.29853		-0.6487	-3.28266		-0.6487	-3.28991				-0.6556	-3.38038		-0.6556	-3.39038		-0.6556	-3.39038		-0.6556	-3.38705				-0.661	-3.36572		-0.661	-3.37572		-0.661
	-0.6737	-3.48705		-0.6717	-3.48705		-0.6737	-3.48475		-0.673	-3.48628				-0.6479	-3.28009		-0.6479	-3.29009		-0.6479	-3.27433		-0.6479	-3.2815				-0.6548	-3.37325		-0.6548	-3.38325		-0.6548	-3.38325		-0.6548	-3.37992				-0.6602	-3.35793		-0.6602	-3.36793		-0.6602
	-0.6729	-3.47134		-0.6709	-3.47134		-0.6729	-3.46904		-0.6722	-3.47057				-0.6471	-3.27189		-0.6471	-3.28189		-0.6471	-3.26624		-0.6471	-3.27334				-0.654	-3.36613		-0.654	-3.37613		-0.654	-3.37613		-0.654	-3.37279				-0.6594	-3.35057		-0.6594	-3.36057		-0.6594
	-0.672	-3.45581		-0.67	-3.45581		-0.672	-3.45351		-0.6713	-3.45504				-0.6463	-3.26408		-0.6463	-3.27408		-0.6463	-3.25853		-0.6463	-3.26557				-0.6532	-3.35962		-0.6532	-3.36962		-0.6532	-3.36962		-0.6532	-3.36628				-0.6586	-3.34342		-0.6586	-3.35342		-0.6586
	-0.6712	-3.44033		-0.6692	-3.44033		-0.6712	-3.43803		-0.6705	-3.43957				-0.6454	-3.25633		-0.6454	-3.26633		-0.6454	-3.25088		-0.6454	-3.25785				-0.6523	-3.35291		-0.6523	-3.36291		-0.6523	-3.36291		-0.6523	-3.35958				-0.6577	-3.3362		-0.6577	-3.3462		-0.6577
	-0.6704	-3.4247		-0.6684	-3.4247		-0.6704	-3.4224		-0.6697	-3.42393				-0.6446	-3.24857		-0.6446	-3.25857		-0.6446	-3.24321		-0.6446	-3.25012				-0.6515	-3.3464		-0.6515	-3.3564		-0.6515	-3.3564		-0.6515	-3.35307				-0.6569	-3.3292		-0.6569	-3.3392		-0.6569
	-0.6695	-3.40949		-0.6675	-3.40949		-0.6695	-3.40719		-0.6688	-3.40873				-0.6438	-3.24116		-0.6438	-3.25116		-0.6438	-3.2359		-0.6438	-3.24274				-0.6507	-3.34008		-0.6507	-3.35008		-0.6507	-3.35008		-0.6507	-3.34675				-0.656	-3.3223		-0.656	-3.3323		-0.656
	-0.6687	-3.39426		-0.6667	-3.39426		-0.6687	-3.39196		-0.668	-3.3935				-0.6429	-3.23388		-0.6429	-3.24388		-0.6429	-3.22871		-0.6429	-3.23549				-0.6498	-3.33348		-0.6498	-3.34348		-0.6498	-3.34348		-0.6498	-3.34015				-0.6552	-3.31542		-0.6552	-3.32542		-0.6552
	-0.6679	-3.37945		-0.6659	-3.37945		-0.6679	-3.37715		-0.6672	-3.37868				-0.6421	-3.22709		-0.6421	-3.23709		-0.6421	-3.22199		-0.6421	-3.22873				-0.649	-3.32753		-0.649	-3.33753		-0.649	-3.33753		-0.649	-3.3342				-0.6544	-3.30883		-0.6544	-3.31883		-0.6544
	-0.667	-3.36492		-0.665	-3.36492		-0.667	-3.36262		-0.6663	-3.36415				-0.6413	-3.22033		-0.6413	-3.23033		-0.6413	-3.21531		-0.6413	-3.22199				-0.6482	-3.32166		-0.6482	-3.33166		-0.6482	-3.33166		-0.6482	-3.32833				-0.6536	-3.30225		-0.6536	-3.31225		-0.6536
	-0.6662	-3.35067		-0.6642	-3.35067		-0.6662	-3.34837		-0.6655	-3.3499				-0.6404	-3.21382		-0.6404	-3.22382		-0.6404	-3.20887		-0.6404	-3.2155				-0.6474	-3.31578		-0.6474	-3.32578		-0.6474	-3.32578		-0.6474	-3.32245				-0.6527	-3.29585		-0.6527	-3.30585		-0.6527
	-0.6654	-3.33668		-0.6634	-3.33668		-0.6654	-3.33438		-0.6647	-3.33591				-0.6396	-3.20754		-0.6396	-3.21754		-0.6396	-3.20266		-0.6396	-3.20925				-0.6465	-3.31025		-0.6465	-3.32025		-0.6465	-3.32025		-0.6465	-3.31691				-0.6519	-3.28937		-0.6519	-3.29937		-0.6519
	-0.6645	-3.32276		-0.6625	-3.32276		-0.6645	-3.32046		-0.6638	-3.32199				-0.6388	-3.20114		-0.6388	-3.21114		-0.6388	-3.19634		-0.6388	-3.20287				-0.6457	-3.30452		-0.6457	-3.31452		-0.6457	-3.31452		-0.6457	-3.31118				-0.6511	-3.28316		-0.6511	-3.29316		-0.6511
	-0.6637	-3.3091		-0.6617	-3.3091		-0.6637	-3.3068		-0.663	-3.30833				-0.6379	-3.19545		-0.6379	-3.20545		-0.6379	-3.19071		-0.6379	-3.1972				-0.6449	-3.29895		-0.6449	-3.30895		-0.6449	-3.30895		-0.6449	-3.30562				-0.6502	-3.27704		-0.6502	-3.28704		-0.6502
	-0.6629	-3.29576		-0.6609	-3.29576		-0.6629	-3.29346		-0.6622	-3.295				-0.6371	-3.1901		-0.6371	-3.2001		-0.6371	-3.18542		-0.6371	-3.19188				-0.644	-3.29388		-0.644	-3.30388		-0.644	-3.30388		-0.644	-3.30055				-0.6494	-3.27084		-0.6494	-3.28084		-0.6494
	-0.6621	-3.28225		-0.6601	-3.28225		-0.6621	-3.27995		-0.6614	-3.28148				-0.6363	-3.18482		-0.6363	-3.19482		-0.6363	-3.18019		-0.6363	-3.18661				-0.6432	-3.2887		-0.6432	-3.2987		-0.6432	-3.2987		-0.6432	-3.29537				-0.6486	-3.26528		-0.6486	-3.27528		-0.6486
	-0.6612	-3.26922		-0.6592	-3.26922		-0.6612	-3.26692		-0.6605	-3.26845				-0.6355	-3.18006		-0.6355	-3.19006		-0.6355	-3.17548		-0.6355	-3.18187				-0.6424	-3.28383		-0.6424	-3.29383		-0.6424	-3.29383		-0.6424	-3.2905				-0.6478	-3.25964		-0.6478	-3.26964		-0.6478
	-0.6604	-3.25618		-0.6584	-3.25618		-0.6604	-3.25388		-0.6597	-3.25541				-0.6346	-3.17522		-0.6346	-3.18522		-0.6346	-3.1707		-0.6346	-3.17705				-0.6415	-3.27901		-0.6415	-3.28901		-0.6415	-3.28901		-0.6415	-3.28568				-0.6469	-3.25399		-0.6469	-3.26399		-0.6469
	-0.6596	-3.24298		-0.6576	-3.24298		-0.6596	-3.24068		-0.6589	-3.24222				-0.6338	-3.17095		-0.6338	-3.18095		-0.6338	-3.16647		-0.6338	-3.17279				-0.6407	-3.27433		-0.6407	-3.28433		-0.6407	-3.28433		-0.6407	-3.281				-0.6461	-3.24849		-0.6461	-3.25849		-0.6461
	-0.6587	-3.23003		-0.6567	-3.23003		-0.6587	-3.22773		-0.658	-3.22927				-0.633	-3.16724		-0.633	-3.17724		-0.633	-3.16279		-0.633	-3.16909				-0.6399	-3.26994		-0.6399	-3.27994		-0.6399	-3.27994		-0.6399	-3.27661				-0.6453	-3.24306		-0.6453	-3.25306		-0.6453
	-0.6579	-3.21724		-0.6559	-3.21724		-0.6579	-3.21494		-0.6572	-3.21647				-0.6321	-3.16361		-0.6321	-3.17361		-0.6321	-3.1592		-0.6321	-3.16548				-0.639	-3.2656		-0.639	-3.2756		-0.639	-3.2756		-0.639	-3.27227				-0.6444	-3.2383		-0.6444	-3.2483		-0.6444
	-0.6571	-3.20475		-0.6551	-3.20475		-0.6571	-3.20245		-0.6564	-3.20398				-0.6313	-3.16052		-0.6313	-3.17052		-0.6313	-3.15614		-0.6313	-3.1624				-0.6382	-3.26185		-0.6382	-3.27185		-0.6382	-3.27185		-0.6382	-3.26852				-0.6436	-3.23366		-0.6436	-3.24366		-0.6436
	-0.6563	-3.1924		-0.6543	-3.1924		-0.6563	-3.1901		-0.6556	-3.19163				-0.6305	-3.1577		-0.6305	-3.1677		-0.6305	-3.15335		-0.6305	-3.15959				-0.6374	-3.25798		-0.6374	-3.26798		-0.6374	-3.26798		-0.6374	-3.26465				-0.6428	-3.22915		-0.6428	-3.23915		-0.6428
	-0.6554	-3.18026		-0.6534	-3.18026		-0.6554	-3.17796		-0.6547	-3.17949				-0.6296	-3.1549		-0.6296	-3.1649		-0.6296	-3.15058		-0.6296	-3.15679				-0.6365	-3.25446		-0.6365	-3.26446		-0.6365	-3.26446		-0.6365	-3.26112				-0.642	-3.2249		-0.642	-3.2349		-0.642
	-0.6546	-3.16858		-0.6526	-3.16858		-0.6546	-3.16628		-0.6539	-3.16781				-0.6288	-3.15267		-0.6288	-3.16267		-0.6288	-3.14837		-0.6288	-3.15457				-0.6357	-3.25104		-0.6357	-3.26104		-0.6357	-3.26104		-0.6357	-3.2577				-0.6411	-3.22069		-0.6411	-3.23069		-0.6411
	-0.6538	-3.15702		-0.6518	-3.15702		-0.6538	-3.15472		-0.6531	-3.15625				-0.628	-3.1507		-0.628	-3.1607		-0.628	-3.14642		-0.628	-3.15261				-0.6349	-3.24757		-0.6349	-3.25757		-0.6349	-3.25757		-0.6349	-3.25423				-0.6403	-3.21695		-0.6403	-3.22695		-0.6403
	-0.6529	-3.14582		-0.6509	-3.14582		-0.6529	-3.14352		-0.6522	-3.14505				-0.6271	-3.14935		-0.6271	-3.15935		-0.6271	-3.14509		-0.6271	-3.15126				-0.6341	-3.24481		-0.6341	-3.25481		-0.6341	-3.25481		-0.6341	-3.25148				-0.6394	-3.2136		-0.6394	-3.2236		-0.6394
	-0.6521	-3.1346		-0.6501	-3.1346		-0.6521	-3.1323		-0.6514	-3.13383				-0.6263	-3.14801		-0.6263	-3.15801		-0.6263	-3.14375		-0.6263	-3.14992				-0.6332	-3.24215		-0.6332	-3.25215		-0.6332	-3.25215		-0.6332	-3.24882				-0.6386	-3.21014		-0.6386	-3.22014		-0.6386
	-0.6513	-3.12349		-0.6493	-3.12349		-0.6513	-3.12119		-0.6506	-3.12273				-0.6255	-3.14709		-0.6255	-3.15709		-0.6255	-3.14285		-0.6255	-3.14901				-0.6324	-3.2392		-0.6324	-3.2492		-0.6324	-3.2492		-0.6324	-3.24587				-0.6378	-3.20726		-0.6378	-3.21726		-0.6378
	-0.6504	-3.11266		-0.6484	-3.11266		-0.6504	-3.11036		-0.6497	-3.1119				-0.6247	-3.14618		-0.6247	-3.15618		-0.6247	-3.14194		-0.6247	-3.1481				-0.6316	-3.2368		-0.6316	-3.2468		-0.6316	-3.2468		-0.6316	-3.24346				-0.637	-3.20426		-0.637	-3.21426		-0.637
	-0.6496	-3.10199		-0.6476	-3.10199		-0.6496	-3.09969		-0.6489	-3.10122				-0.6238	-3.14569		-0.6238	-3.15569		-0.6238	-3.14146		-0.6238	-3.14762				-0.6308	-3.23426		-0.6308	-3.24426		-0.6308	-3.24426		-0.6308	-3.24092				-0.6361	-3.20149		-0.6361	-3.21149		-0.6361
	-0.6488	-3.09135		-0.6468	-3.09135		-0.6488	-3.08905		-0.6481	-3.09059				-0.623	-3.14551		-0.623	-3.15551		-0.623	-3.14128		-0.623	-3.14744				-0.6299	-3.23218		-0.6299	-3.24218		-0.6299	-3.24218		-0.6299	-3.23884				-0.6353	-3.19901		-0.6353	-3.20901		-0.6353
	-0.648	-3.08113		-0.646	-3.08113		-0.648	-3.07883		-0.6473	-3.08036				-0.6222	-3.14582		-0.6222	-3.15582		-0.6222	-3.14158		-0.6222	-3.14774				-0.6291	-3.23011		-0.6291	-3.24011		-0.6291	-3.24011		-0.6291	-3.23677				-0.6345	-3.19654		-0.6345	-3.20654		-0.6345
	-0.6471	-3.07094		-0.6451	-3.07094		-0.6471	-3.06864		-0.6464	-3.07017				-0.6213	-3.14606		-0.6213	-3.15606		-0.6213	-3.14182		-0.6213	-3.14798				-0.6283	-3.22819		-0.6283	-3.23819		-0.6283	-3.23819		-0.6283	-3.23486				-0.6336	-3.1945		-0.6336	-3.2045		-0.6336
	-0.6463	-3.06098		-0.6443	-3.06098		-0.6463	-3.05868		-0.6456	-3.06021				-0.6205	-3.14655		-0.6205	-3.15655		-0.6205	-3.14231		-0.6205	-3.14847				-0.6274	-3.22621		-0.6274	-3.23621		-0.6274	-3.23621		-0.6274	-3.23288				-0.6328	-3.19233		-0.6328	-3.20233		-0.6328
	-0.6455	-3.051		-0.6435	-3.051		-0.6455	-3.0487		-0.6448	-3.05023				-0.6197	-3.14715		-0.6197	-3.15715		-0.6197	-3.14291		-0.6197	-3.14907				-0.6266	-3.22432		-0.6266	-3.23432		-0.6266	-3.23432		-0.6266	-3.23098				-0.632	-3.19017		-0.632	-3.20017		-0.632
	-0.6446	-3.04091		-0.6426	-3.04091		-0.6446	-3.03861		-0.6439	-3.04014				-0.6188	-3.14789		-0.6188	-3.15789		-0.6188	-3.14363		-0.6188	-3.1498				-0.6258	-3.22236		-0.6258	-3.23236		-0.6258	-3.23236		-0.6258	-3.22902				-0.6312	-3.18816		-0.6312	-3.19816		-0.6312
	-0.6438	-3.03114		-0.6418	-3.03114		-0.6438	-3.02884		-0.6431	-3.03038				-0.618	-3.14899		-0.618	-3.15899		-0.618	-3.14472		-0.618	-3.1509				-0.6249	-3.22055		-0.6249	-3.23055		-0.6249	-3.23055		-0.6249	-3.22721				-0.6303	-3.18615		-0.6303	-3.19615		-0.6303
	-0.643	-3.02136		-0.641	-3.02136		-0.643	-3.01906		-0.6423	-3.0206				-0.6172	-3.15003		-0.6172	-3.16003		-0.6172	-3.14575		-0.6172	-3.15194				-0.6241	-3.2186		-0.6241	-3.2286		-0.6241	-3.2286		-0.6241	-3.22527				-0.6295	-3.18442		-0.6295	-3.19442		-0.6295
	-0.6422	-3.01189		-0.6402	-3.01189		-0.6422	-3.00959		-0.6415	-3.01112				-0.6164	-3.15107		-0.6164	-3.16107		-0.6164	-3.14679		-0.6164	-3.15298				-0.6233	-3.21681		-0.6233	-3.22681		-0.6233	-3.22681		-0.6233	-3.22348				-0.6287	-3.18263		-0.6287	-3.19263		-0.6287
	-0.6413	-3.00244		-0.6393	-3.00244		-0.6413	-3.00014		-0.6406	-3.00167				-0.6155	-3.15212		-0.6155	-3.16212		-0.6155	-3.14783		-0.6155	-3.15402				-0.6224	-3.21474		-0.6224	-3.22474		-0.6224	-3.22474		-0.6224	-3.22141				-0.6278	-3.18072		-0.6278	-3.19072		-0.6278
	-0.6405	-2.99311		-0.6385	-2.99311		-0.6405	-2.99081		-0.6398	-2.99234				-0.6147	-3.15286		-0.6147	-3.16286		-0.6147	-3.14856		-0.6147	-3.15476				-0.6216	-3.21254		-0.6216	-3.22254		-0.6216	-3.22254		-0.6216	-3.21921				-0.627	-3.17875		-0.627	-3.18875		-0.627
	-0.6396	-2.98422		-0.6376	-2.98422		-0.6396	-2.98192		-0.6389	-2.98345				-0.6139	-3.15385		-0.6139	-3.16385		-0.6139	-3.14954		-0.6139	-3.15574				-0.6208	-3.21021		-0.6208	-3.22021		-0.6208	-3.22021		-0.6208	-3.21687				-0.6262	-3.17672		-0.6262	-3.18672		-0.6262
	-0.6388	-2.97551		-0.6368	-2.97551		-0.6388	-2.97321		-0.6381	-2.97475				-0.613	-3.15453		-0.613	-3.16453		-0.613	-3.15021		-0.613	-3.15642				-0.6199	-3.20796		-0.6199	-3.21796		-0.6199	-3.21796		-0.6199	-3.21463				-0.6253	-3.17483		-0.6253	-3.18483		-0.6253
	-0.638	-2.96698		-0.636	-2.96698		-0.638	-2.96468		-0.6373	-2.96621				-0.6122	-3.15515		-0.6122	-3.16515		-0.6122	-3.15083		-0.6122	-3.15704				-0.6191	-3.20544		-0.6191	-3.21544		-0.6191	-3.21544		-0.6191	-3.21211				-0.6245	-3.17276		-0.6245	-3.18276		-0.6245
	-0.6372	-2.95821		-0.6352	-2.95821		-0.6372	-2.95591		-0.6365	-2.95745				-0.6114	-3.15552		-0.6114	-3.16552		-0.6114	-3.1512		-0.6114	-3.15741				-0.6183	-3.20301		-0.6183	-3.21301		-0.6183	-3.21301		-0.6183	-3.20968				-0.6237	-3.17063		-0.6237	-3.18063		-0.6237
	-0.6363	-2.95001		-0.6343	-2.95001		-0.6363	-2.94771		-0.6356	-2.94924				-0.6105	-3.15534		-0.6105	-3.16534		-0.6105	-3.15101		-0.6105	-3.15723				-0.6175	-3.20018		-0.6175	-3.21018		-0.6175	-3.21018		-0.6175	-3.20684				-0.6228	-3.16832		-0.6228	-3.17832		-0.6228
	-0.6355	-2.94195		-0.6335	-2.94195		-0.6355	-2.93965		-0.6348	-2.94119				-0.6097	-3.15509		-0.6097	-3.16509		-0.6097	-3.15076		-0.6097	-3.15698				-0.6167	-3.19695		-0.6167	-3.20695		-0.6167	-3.20695		-0.6167	-3.20362				-0.622	-3.1659		-0.622	-3.1759		-0.622
	-0.6347	-2.93367		-0.6327	-2.93367		-0.6347	-2.93137		-0.634	-2.93291				-0.6089	-3.15484		-0.6089	-3.16484		-0.6089	-3.15052		-0.6089	-3.15673				-0.6158	-3.19396		-0.6158	-3.20396		-0.6158	-3.20396		-0.6158	-3.20062				-0.6212	-3.1633		-0.6212	-3.1733		-0.6212
	-0.6338	-2.92518		-0.6318	-2.92518		-0.6338	-2.92288		-0.6331	-2.92442				-0.6081	-3.15397		-0.6081	-3.16397		-0.6081	-3.14966		-0.6081	-3.15587				-0.615	-3.19084		-0.615	-3.20084		-0.615	-3.20084		-0.615	-3.19751				-0.6204	-3.16077		-0.6204	-3.17077		-0.6204
	-0.633	-2.91721		-0.631	-2.91721		-0.633	-2.91491		-0.6323	-2.91645				-0.6072	-3.15304		-0.6072	-3.16304		-0.6072	-3.14874		-0.6072	-3.15494				-0.6141	-3.18749		-0.6141	-3.19749		-0.6141	-3.19749		-0.6141	-3.19415				-0.6195	-3.15802		-0.6195	-3.16802		-0.6195
	-0.6322	-2.90939		-0.6302	-2.90939		-0.6322	-2.90709		-0.6315	-2.90862				-0.6064	-3.15169		-0.6064	-3.16169		-0.6064	-3.1474		-0.6064	-3.15359				-0.6133	-3.18396		-0.6133	-3.19396		-0.6133	-3.19396		-0.6133	-3.19062				-0.6187	-3.15515		-0.6187	-3.16515		-0.6187
	-0.6314	-2.9017		-0.6294	-2.9017		-0.6314	-2.8994		-0.6307	-2.90094				-0.6056	-3.15003		-0.6056	-3.16003		-0.6056	-3.14575		-0.6056	-3.15194				-0.6125	-3.18019		-0.6125	-3.19019		-0.6125	-3.19019		-0.6125	-3.18686				-0.6179	-3.152		-0.6179	-3.162		-0.6179
	-0.6305	-2.89415		-0.6285	-2.89415		-0.6305	-2.89185		-0.6298	-2.89338				-0.6047	-3.14807		-0.6047	-3.15807		-0.6047	-3.14382		-0.6047	-3.14998				-0.6116	-3.17613		-0.6116	-3.18613		-0.6116	-3.18613		-0.6116	-3.1828				-0.617	-3.14862		-0.617	-3.15862		-0.617
	-0.6297	-2.88673		-0.6277	-2.88673		-0.6297	-2.88443		-0.629	-2.88596				-0.6039	-3.14588		-0.6039	-3.15588		-0.6039	-3.14164		-0.6039	-3.1478				-0.6108	-3.17224		-0.6108	-3.18224		-0.6108	-3.18224		-0.6108	-3.17891				-0.6162	-3.14545		-0.6162	-3.15545		-0.6162
	-0.6289	-2.87943		-0.6269	-2.87943		-0.6289	-2.87713		-0.6282	-2.87866				-0.6031	-3.14369		-0.6031	-3.15369		-0.6031	-3.13948		-0.6031	-3.14562				-0.61	-3.16819		-0.61	-3.17819		-0.61	-3.17819		-0.61	-3.17486				-0.6154	-3.14194		-0.6154	-3.15194		-0.6154
	-0.628	-2.87192		-0.626	-2.87192		-0.628	-2.86962		-0.6273	-2.87116				-0.6023	-3.14104		-0.6023	-3.15104		-0.6023	-3.13686		-0.6023	-3.14298				-0.6092	-3.16387		-0.6092	-3.17387		-0.6092	-3.17387		-0.6092	-3.17053				-0.6145	-3.13847		-0.6145	-3.14847		-0.6145
	-0.6272	-2.86487		-0.6252	-2.86487		-0.6272	-2.86257		-0.6265	-2.8641				-0.6014	-3.13829		-0.6014	-3.14829		-0.6014	-3.13413		-0.6014	-3.14023				-0.6083	-3.15958		-0.6083	-3.16958		-0.6083	-3.16958		-0.6083	-3.16625				-0.6137	-3.13472		-0.6137	-3.14472		-0.6137
	-0.6264	-2.85792		-0.6244	-2.85792		-0.6264	-2.85562		-0.6257	-2.85716				-0.6006	-3.13513		-0.6006	-3.14513		-0.6006	-3.131		-0.6006	-3.13709				-0.6075	-3.1549		-0.6075	-3.1649		-0.6075	-3.1649		-0.6075	-3.16157				-0.6129	-3.13077		-0.6129	-3.14077		-0.6129
	-0.6255	-2.85078		-0.6235	-2.85078		-0.6255	-2.84848		-0.6248	-2.85001				-0.5997	-3.13177		-0.5997	-3.14177		-0.5997	-3.12767		-0.5997	-3.13373				-0.6067	-3.15009		-0.6067	-3.16009		-0.6067	-3.16009		-0.6067	-3.15676				-0.6121	-3.12656		-0.6121	-3.13656		-0.6121
	-0.6247	-2.84406		-0.6227	-2.84406		-0.6247	-2.84176		-0.624	-2.84329				-0.5989	-3.12837		-0.5989	-3.13837		-0.5989	-3.1243		-0.5989	-3.13035				-0.6059	-3.14539		-0.6059	-3.15539		-0.6059	-3.15539		-0.6059	-3.15206				-0.6112	-3.12263		-0.6112	-3.13263		-0.6112
	-0.6239	-2.83714		-0.6219	-2.83714		-0.6239	-2.83484		-0.6232	-2.83637				-0.5981	-3.12477		-0.5981	-3.13477		-0.5981	-3.12073		-0.5981	-3.12675				-0.605	-3.14044		-0.605	-3.15044		-0.605	-3.15044		-0.605	-3.14711				-0.6104	-3.11833		-0.6104	-3.12833		-0.6104
	-0.6231	-2.83062		-0.6211	-2.83062		-0.6231	-2.82832		-0.6224	-2.82985				-0.5973	-3.12096		-0.5973	-3.13096		-0.5973	-3.11696		-0.5973	-3.12296				-0.6042	-3.13543		-0.6042	-3.14543		-0.6042	-3.14543		-0.6042	-3.1421				-0.6096	-3.11407		-0.6096	-3.12407		-0.6096
	-0.6222	-2.82391		-0.6202	-2.82391		-0.6222	-2.82161		-0.6215	-2.82314				-0.5964	-3.11702		-0.5964	-3.12702		-0.5964	-3.11306		-0.5964	-3.11903				-0.6034	-3.13042		-0.6034	-3.14042		-0.6034	-3.14042		-0.6034	-3.13708				-0.6087	-3.10941		-0.6087	-3.11941		-0.6087
	-0.6214	-2.8173		-0.6194	-2.8173		-0.6214	-2.815		-0.6207	-2.81653				-0.5956	-3.11261		-0.5956	-3.12261		-0.5956	-3.10869		-0.5956	-3.11463				-0.6025	-3.12505		-0.6025	-3.13505		-0.6025	-3.13505		-0.6025	-3.13172				-0.6079	-3.1048		-0.6079	-3.1148		-0.6079
	-0.6206	-2.81107		-0.6186	-2.81107		-0.6206	-2.80877		-0.6199	-2.8103				-0.5948	-3.10841		-0.5948	-3.11841		-0.5948	-3.10452		-0.5948	-3.11045				-0.6017	-3.11959		-0.6017	-3.12959		-0.6017	-3.12959		-0.6017	-3.12625				-0.6071	-3.10012		-0.6071	-3.11012		-0.6071
	-0.6197	-2.80493		-0.6177	-2.80493		-0.6197	-2.80263		-0.619	-2.80416				-0.594	-3.10403		-0.594	-3.11403		-0.594	-3.10018		-0.594	-3.10608				-0.6008	-3.11419		-0.6008	-3.12419		-0.6008	-3.12419		-0.6008	-3.12085				-0.6063	-3.09523		-0.6063	-3.10523		-0.6063
	-0.6189	-2.7986		-0.6169	-2.7986		-0.6189	-2.7963		-0.6182	-2.79784				-0.5931	-3.09941		-0.5931	-3.10941		-0.5931	-3.09561		-0.5931	-3.10148				-0.6	-3.1088		-0.6	-3.1188		-0.6	-3.1188		-0.6	-3.11546				-0.6054	-3.09055		-0.6054	-3.10055		-0.6054
	-0.6181	-2.79237		-0.6161	-2.79237		-0.6181	-2.79007		-0.6174	-2.7916				-0.5923	-3.0948		-0.5923	-3.1048		-0.5923	-3.09103		-0.5923	-3.09688				-0.5992	-3.10336		-0.5992	-3.11336		-0.5992	-3.11336		-0.5992	-3.11003				-0.6046	-3.0855		-0.6046	-3.0955		-0.6046
	-0.6173	-2.78648		-0.6153	-2.78648		-0.6173	-2.78418		-0.6166	-2.78572				-0.5915	-3.08986		-0.5915	-3.09986		-0.5915	-3.08613		-0.5915	-3.09195				-0.5984	-3.09767		-0.5984	-3.10767		-0.5984	-3.10767		-0.5984	-3.10434				-0.6038	-3.08045		-0.6038	-3.09045		-0.6038
	-0.6164	-2.78042		-0.6144	-2.78042		-0.6164	-2.77812		-0.6157	-2.77965				-0.5906	-3.08476		-0.5906	-3.09476		-0.5906	-3.08108		-0.5906	-3.08687				-0.5975	-3.09189		-0.5975	-3.10189		-0.5975	-3.10189		-0.5975	-3.09856				-0.6029	-3.07531		-0.6029	-3.08531		-0.6029
	-0.6156	-2.77443		-0.6136	-2.77443		-0.6156	-2.77213		-0.6149	-2.77367				-0.5898	-3.07988		-0.5898	-3.08988		-0.5898	-3.07624		-0.5898	-3.082				-0.5967	-3.08619		-0.5967	-3.09619		-0.5967	-3.09619		-0.5967	-3.09285				-0.6021	-3.07007		-0.6021	-3.08007		-0.6021
	-0.6147	-2.76828		-0.6127	-2.76828		-0.6147	-2.76598		-0.614	-2.76751				-0.589	-3.07479		-0.589	-3.08479		-0.589	-3.07119		-0.589	-3.07693				-0.5959	-3.0804		-0.5959	-3.0904		-0.5959	-3.0904		-0.5959	-3.08707				-0.6013	-3.0649		-0.6013	-3.0749		-0.6013
	-0.6139	-2.76246		-0.6119	-2.76246		-0.6139	-2.76016		-0.6132	-2.76169				-0.5881	-3.06966		-0.5881	-3.07966		-0.5881	-3.06611		-0.5881	-3.07181				-0.5951	-3.07474		-0.5951	-3.08474		-0.5951	-3.08474		-0.5951	-3.08141				-0.6004	-3.05968		-0.6004	-3.06968		-0.6004
	-0.6131	-2.75696		-0.6111	-2.75696		-0.6131	-2.75466		-0.6124	-2.7562				-0.5873	-3.06429		-0.5873	-3.07429		-0.5873	-3.06078		-0.5873	-3.06645				-0.5942	-3.06875		-0.5942	-3.07875		-0.5942	-3.07875		-0.5942	-3.07541				-0.5996	-3.05433		-0.5996	-3.06433		-0.5996
	-0.6123	-2.75129		-0.6103	-2.75129		-0.6123	-2.74899		-0.6116	-2.75052				-0.5865	-3.05899		-0.5865	-3.06899		-0.5865	-3.05552		-0.5865	-3.06116				-0.5934	-3.06298		-0.5934	-3.07298		-0.5934	-3.07298		-0.5934	-3.06965				-0.5988	-3.04891		-0.5988	-3.05891		-0.5988
	-0.6114	-2.74521		-0.6094	-2.74521		-0.6114	-2.74291		-0.6107	-2.74444				-0.5856	-3.05345		-0.5856	-3.06345		-0.5856	-3.05002		-0.5856	-3.05564				-0.5926	-3.05695		-0.5926	-3.06695		-0.5926	-3.06695		-0.5926	-3.06362				-0.5979	-3.0434		-0.5979	-3.0534		-0.5979
	-0.6106	-2.73945		-0.6086	-2.73945		-0.6106	-2.73715		-0.6099	-2.73868				-0.5848	-3.04798		-0.5848	-3.05798		-0.5848	-3.0446		-0.5848	-3.05019				-0.5917	-3.05095		-0.5917	-3.06095		-0.5917	-3.06095		-0.5917	-3.05762				-0.5971	-3.03787		-0.5971	-3.04787		-0.5971
	-0.6098	-2.734		-0.6078	-2.734		-0.6098	-2.7317		-0.6091	-2.73324				-0.584	-3.04254		-0.584	-3.05254		-0.584	-3.0392		-0.584	-3.04476				-0.5909	-3.04513		-0.5909	-3.05513		-0.5909	-3.05513		-0.5909	-3.0518				-0.5963	-3.03259		-0.5963	-3.04259		-0.5963
	-0.6089	-2.72862		-0.6069	-2.72862		-0.6089	-2.72632		-0.6082	-2.72786				-0.5832	-3.03706		-0.5832	-3.04706		-0.5832	-3.03376		-0.5832	-3.0393				-0.5901	-3.03924		-0.5901	-3.04924		-0.5901	-3.04924		-0.5901	-3.04591				-0.5955	-3.02706		-0.5955	-3.03706		-0.5955
	-0.6081	-2.72308		-0.6061	-2.72308		-0.6081	-2.72078		-0.6074	-2.72231				-0.5823	-3.03133		-0.5823	-3.04133		-0.5823	-3.02808		-0.5823	-3.03358				-0.5892	-3.0333		-0.5892	-3.0433		-0.5892	-3.0433		-0.5892	-3.03996				-0.5946	-3.02164		-0.5946	-3.03164		-0.5946
	-0.6073	-2.7176		-0.6053	-2.7176		-0.6073	-2.7153		-0.6066	-2.71684				-0.5815	-3.02563		-0.5815	-3.03563		-0.5815	-3.02241		-0.5815	-3.02789				-0.5884	-3.02729		-0.5884	-3.03729		-0.5884	-3.03729		-0.5884	-3.03395				-0.5938	-3.01597		-0.5938	-3.02597		-0.5938
	-0.6064	-2.7122		-0.6044	-2.7122		-0.6064	-2.7099		-0.6057	-2.71143				-0.5807	-3.01977		-0.5807	-3.02977		-0.5807	-3.0166		-0.5807	-3.02205				-0.5876	-3.02118		-0.5876	-3.03118		-0.5876	-3.03118		-0.5876	-3.02785				-0.593	-3.01028		-0.593	-3.02028		-0.593
	-0.6056	-2.70708		-0.6036	-2.70708		-0.6056	-2.70478		-0.6049	-2.70631				-0.5799	-3.01421		-0.5799	-3.02421		-0.5799	-3.01108		-0.5799	-3.0165				-0.5868	-3.01534		-0.5868	-3.02534		-0.5868	-3.02534		-0.5868	-3.022				-0.5921	-3.00476		-0.5921	-3.01476		-0.5921
	-0.6048	-2.70202		-0.6028	-2.70202		-0.6048	-2.69972		-0.6041	-2.70125				-0.579	-3.0086		-0.579	-3.0186		-0.579	-3.00551		-0.579	-3.0109				-0.5859	-3.00948		-0.5859	-3.01948		-0.5859	-3.01948		-0.5859	-3.01615				-0.5913	-2.99913		-0.5913	-3.00913		-0.5913
	-0.604	-2.6968		-0.602	-2.6968		-0.604	-2.6945		-0.6033	-2.69604				-0.5782	-3.00279		-0.5782	-3.01279		-0.5782	-2.99974		-0.5782	-3.00511				-0.5851	-3.00349		-0.5851	-3.01349		-0.5851	-3.01349		-0.5851	-3.01015				-0.5905	-2.99396		-0.5905	-3.00396		-0.5905
	-0.6031	-2.69186		-0.6011	-2.69186		-0.6031	-2.68956		-0.6024	-2.6911				-0.5774	-2.99697		-0.5774	-3.00697		-0.5774	-2.99396		-0.5774	-2.9993				-0.5843	-2.99783		-0.5843	-3.00783		-0.5843	-3.00783		-0.5843	-3.0045				-0.5897	-2.98843		-0.5897	-2.99843		-0.5897
	-0.6023	-2.68719		-0.6003	-2.68719		-0.6023	-2.68489		-0.6016	-2.68642				-0.5765	-2.99097		-0.5765	-3.00097		-0.5765	-2.98801		-0.5765	-2.99332				-0.5834	-2.9914		-0.5834	-3.0014		-0.5834	-3.0014		-0.5834	-2.99807				-0.5888	-2.98255		-0.5888	-2.99255		-0.5888
	-0.6015	-2.68256		-0.5995	-2.68256		-0.6015	-2.68026		-0.6008	-2.6818				-0.5757	-2.98548		-0.5757	-2.99548		-0.5757	-2.98255		-0.5757	-2.98784				-0.5826	-2.98548		-0.5826	-2.99548		-0.5826	-2.99548		-0.5826	-2.99215				-0.588	-2.97716		-0.588	-2.98716		-0.588
	-0.6006	-2.67778		-0.5986	-2.67778		-0.6006	-2.67548		-0.5999	-2.67701				-0.5749	-2.97964		-0.5749	-2.98964		-0.5749	-2.97675		-0.5749	-2.98201				-0.5818	-2.97964		-0.5818	-2.98964		-0.5818	-2.98964		-0.5818	-2.98631				-0.5872	-2.97143		-0.5872	-2.98143		-0.5872
	-0.5998	-2.67305		-0.5978	-2.67305		-0.5998	-2.67075		-0.5991	-2.67228				-0.574	-2.97388		-0.574	-2.98388		-0.574	-2.97102		-0.574	-2.97626				-0.5809	-2.97388		-0.5809	-2.98388		-0.5809	-2.98388		-0.5809	-2.98054				-0.5863	-2.96617		-0.5863	-2.97617		-0.5863
	-0.599	-2.66837		-0.597	-2.66837		-0.599	-2.66607		-0.5983	-2.6676				-0.5732	-2.96819		-0.5732	-2.97819		-0.5732	-2.96537		-0.5732	-2.97058				-0.5801	-2.96778		-0.5801	-2.97778		-0.5801	-2.97778		-0.5801	-2.97445				-0.5855	-2.96059		-0.5855	-2.97059		-0.5855
	-0.5981	-2.66394		-0.5961	-2.66394		-0.5981	-2.66164		-0.5974	-2.66317				-0.5724	-2.96218		-0.5724	-2.97218		-0.5724	-2.9594		-0.5724	-2.96458				-0.5793	-2.96218		-0.5793	-2.97218		-0.5793	-2.97218		-0.5793	-2.96884				-0.5847	-2.95507		-0.5847	-2.96507		-0.5847
	-0.5973	-2.65936		-0.5953	-2.65936		-0.5973	-2.65706		-0.5966	-2.65859				-0.5715	-2.95624		-0.5715	-2.96624		-0.5715	-2.9535		-0.5715	-2.95866				-0.5785	-2.95624		-0.5785	-2.96624		-0.5785	-2.96624		-0.5785	-2.96291				-0.5838	-2.94962		-0.5838	-2.95962		-0.5838
	-0.5965	-2.65482		-0.5945	-2.65482		-0.5965	-2.65252		-0.5958	-2.65406				-0.5707	-2.95039		-0.5707	-2.96039		-0.5707	-2.94769		-0.5707	-2.95283				-0.5776	-2.95039		-0.5776	-2.96039		-0.5776	-2.96039		-0.5776	-2.95706				-0.583	-2.94386		-0.583	-2.95386		-0.583
	-0.5957	-2.65014		-0.5937	-2.65014		-0.5957	-2.64784		-0.595	-2.64937				-0.5699	-2.94462		-0.5699	-2.95462		-0.5699	-2.94195		-0.5699	-2.94707				-0.5768	-2.94462		-0.5768	-2.95462		-0.5768	-2.95462		-0.5768	-2.95129				-0.5822	-2.93855		-0.5822	-2.94855		-0.5822
	-0.5948	-2.64589		-0.5928	-2.64589		-0.5948	-2.64359		-0.5941	-2.64512				-0.5691	-2.93892		-0.5691	-2.94892		-0.5691	-2.93629		-0.5691	-2.94138				-0.576	-2.93892		-0.576	-2.94892		-0.576	-2.94892		-0.576	-2.94559				-0.5814	-2.9333		-0.5814	-2.9433		-0.5814
	-0.594	-2.64149		-0.592	-2.64149		-0.594	-2.63919		-0.5933	-2.64073				-0.5682	-2.9333		-0.5682	-2.9433		-0.5682	-2.9307		-0.5682	-2.93577				-0.5751	-2.9333		-0.5751	-2.9433		-0.5751	-2.9433		-0.5751	-2.93997				-0.5805	-2.92775		-0.5805	-2.93775		-0.5805
	-0.5932	-2.63733		-0.5912	-2.63733		-0.5932	-2.63503		-0.5925	-2.63656				-0.5674	-2.92738		-0.5674	-2.93738		-0.5674	-2.92482		-0.5674	-2.92986				-0.5743	-2.92738		-0.5743	-2.93738		-0.5743	-2.93738		-0.5743	-2.93405				-0.5797	-2.92227		-0.5797	-2.93227		-0.5797
	-0.5923	-2.63264		-0.5903	-2.63264		-0.5923	-2.63034		-0.5916	-2.63188				-0.5666	-2.92154		-0.5666	-2.93154		-0.5666	-2.91901		-0.5666	-2.92403				-0.5735	-2.92154		-0.5735	-2.93154		-0.5735	-2.93154		-0.5735	-2.92821				-0.5789	-2.91686		-0.5789	-2.92686		-0.5789
	-0.5915	-2.62838		-0.5895	-2.62838		-0.5915	-2.62608		-0.5908	-2.62761				-0.5657	-2.91542		-0.5657	-2.92542		-0.5657	-2.91293		-0.5657	-2.91793				-0.5726	-2.91578		-0.5726	-2.92578		-0.5726	-2.92578		-0.5726	-2.92245				-0.578	-2.91151		-0.578	-2.92151		-0.578
	-0.5907	-2.62415		-0.5887	-2.62415		-0.5907	-2.62185		-0.59	-2.62339				-0.5649	-2.91009		-0.5649	-2.92009		-0.5649	-2.90763		-0.5649	-2.91261				-0.5718	-2.91045		-0.5718	-2.92045		-0.5718	-2.92045		-0.5718	-2.91711				-0.5772	-2.90623		-0.5772	-2.91623		-0.5772
	-0.5899	-2.61997		-0.5879	-2.61997		-0.5899	-2.61767		-0.5892	-2.6192				-0.5641	-2.90448		-0.5641	-2.91448		-0.5641	-2.90205		-0.5641	-2.907				-0.571	-2.90483		-0.571	-2.91483		-0.571	-2.91483		-0.571	-2.9115				-0.5764	-2.90101		-0.5764	-2.91101		-0.5764
	-0.589	-2.61565		-0.587	-2.61565		-0.589	-2.61335		-0.5883	-2.61488				-0.5632	-2.8986		-0.5632	-2.9086		-0.5632	-2.8962		-0.5632	-2.90113				-0.5702	-2.89928		-0.5702	-2.90928		-0.5702	-2.90928		-0.5702	-2.90595				-0.5755	-2.89585		-0.5755	-2.90585		-0.5755
	-0.5882	-2.61137		-0.5862	-2.61137		-0.5882	-2.60907		-0.5875	-2.6106				-0.5624	-2.89279		-0.5624	-2.90279		-0.5624	-2.89042		-0.5624	-2.89533				-0.5693	-2.89381		-0.5693	-2.90381		-0.5693	-2.90381		-0.5693	-2.90048				-0.5747	-2.89076		-0.5747	-2.90076		-0.5747
	-0.5873	-2.6073		-0.5853	-2.6073		-0.5873	-2.605		-0.5866	-2.60654				-0.5616	-2.88706		-0.5616	-2.89706		-0.5616	-2.88472		-0.5616	-2.88961				-0.5685	-2.88807		-0.5685	-2.89807		-0.5685	-2.89807		-0.5685	-2.89473				-0.5739	-2.88506		-0.5739	-2.89506		-0.5739
	-0.5865	-2.60345		-0.5845	-2.60345		-0.5865	-2.60115		-0.5858	-2.60269				-0.5607	-2.8814		-0.5607	-2.8914		-0.5607	-2.8791		-0.5607	-2.88397				-0.5677	-2.8824		-0.5677	-2.8924		-0.5677	-2.8924		-0.5677	-2.88906				-0.5731	-2.88008		-0.5731	-2.89008		-0.5731
	-0.5857	-2.59946		-0.5837	-2.59946		-0.5857	-2.59716		-0.585	-2.5987				-0.5599	-2.87582		-0.5599	-2.88582		-0.5599	-2.87354		-0.5599	-2.8784				-0.5669	-2.87713		-0.5669	-2.88713		-0.5669	-2.88713		-0.5669	-2.8838				-0.5722	-2.87484		-0.5722	-2.88484		-0.5722
	-0.5849	-2.59534		-0.5829	-2.59534		-0.5849	-2.59304		-0.5842	-2.59457				-0.5591	-2.86999		-0.5591	-2.87999		-0.5591	-2.86774		-0.5591	-2.87257				-0.566	-2.8716		-0.566	-2.8816		-0.566	-2.8816		-0.566	-2.87827				-0.5714	-2.86999		-0.5714	-2.87999		-0.5714
	-0.584	-2.59125		-0.582	-2.59125		-0.584	-2.58895		-0.5833	-2.59048				-0.5583	-2.86455		-0.5583	-2.87455		-0.5583	-2.86233		-0.5583	-2.86714				-0.5652	-2.86646		-0.5652	-2.87646		-0.5652	-2.87646		-0.5652	-2.87313				-0.5706	-2.86487		-0.5706	-2.87487		-0.5706
	-0.5832	-2.58754		-0.5812	-2.58754		-0.5832	-2.58524		-0.5825	-2.58677				-0.5574	-2.85886		-0.5574	-2.86886		-0.5574	-2.85667		-0.5574	-2.86147				-0.5643	-2.86075		-0.5643	-2.87075		-0.5643	-2.87075		-0.5643	-2.86742				-0.5697	-2.85981		-0.5697	-2.86981		-0.5697
	-0.5824	-2.58369		-0.5804	-2.58369		-0.5824	-2.58139		-0.5817	-2.58293				-0.5566	-2.85294		-0.5566	-2.86294		-0.5566	-2.85078		-0.5566	-2.85556				-0.5635	-2.85543		-0.5635	-2.86543		-0.5635	-2.86543		-0.5635	-2.86209				-0.5689	-2.8548		-0.5689	-2.8648		-0.5689
	-0.5815	-2.57988		-0.5795	-2.57988		-0.5815	-2.57758		-0.5808	-2.57911				-0.5558	-2.84741		-0.5558	-2.85741		-0.5558	-2.84527		-0.5558	-2.85003				-0.5627	-2.85017		-0.5627	-2.86017		-0.5627	-2.86017		-0.5627	-2.85683				-0.5681	-2.84955		-0.5681	-2.85955		-0.5681
	-0.5807	-2.57577		-0.5787	-2.57577		-0.5807	-2.57347		-0.58	-2.57501				-0.5549	-2.84194		-0.5549	-2.85194		-0.5549	-2.83983		-0.5549	-2.84457				-0.5618	-2.84497		-0.5618	-2.85497		-0.5618	-2.85497		-0.5618	-2.85163				-0.5673	-2.84497		-0.5673	-2.85497		-0.5673
	-0.5799	-2.57203		-0.5779	-2.57203		-0.5799	-2.56973		-0.5792	-2.57126				-0.5541	-2.83654		-0.5541	-2.84654		-0.5541	-2.83446		-0.5541	-2.83918				-0.561	-2.83983		-0.561	-2.84983		-0.561	-2.84983		-0.561	-2.8465				-0.5664	-2.83983		-0.5664	-2.84983		-0.5664
	-0.5791	-2.56848		-0.5771	-2.56848		-0.5791	-2.56618		-0.5784	-2.56771				-0.5533	-2.83121		-0.5533	-2.84121		-0.5533	-2.82915		-0.5533	-2.83386				-0.5602	-2.83476		-0.5602	-2.84476		-0.5602	-2.84476		-0.5602	-2.84142				-0.5656	-2.83505		-0.5656	-2.84505		-0.5656
	-0.5782	-2.56479		-0.5762	-2.56479		-0.5782	-2.56249		-0.5775	-2.56403				-0.5525	-2.82536		-0.5525	-2.83536		-0.5525	-2.82333		-0.5525	-2.82802				-0.5594	-2.82944		-0.5594	-2.83944		-0.5594	-2.83944		-0.5594	-2.83611				-0.5648	-2.83003		-0.5648	-2.84003		-0.5648
	-0.5774	-2.56114		-0.5754	-2.56114		-0.5774	-2.55884		-0.5767	-2.56037				-0.5516	-2.81987		-0.5516	-2.82987		-0.5516	-2.81787		-0.5516	-2.82254				-0.5585	-2.82449		-0.5585	-2.83449		-0.5585	-2.83449		-0.5585	-2.83115				-0.5639	-2.82507		-0.5639	-2.83507		-0.5639
	-0.5766	-2.55736		-0.5746	-2.55736		-0.5766	-2.55506		-0.5759	-2.5566				-0.5508	-2.81474		-0.5508	-2.82474		-0.5508	-2.81276		-0.5508	-2.81741				-0.5577	-2.8193		-0.5577	-2.8293		-0.5577	-2.8293		-0.5577	-2.82597				-0.5631	-2.82045		-0.5631	-2.83045		-0.5631
	-0.5757	-2.55377		-0.5737	-2.55377		-0.5757	-2.55147		-0.575	-2.55301				-0.5499	-2.80911		-0.5499	-2.81911		-0.5499	-2.80715		-0.5499	-2.81179				-0.5569	-2.81446		-0.5569	-2.82446		-0.5569	-2.82446		-0.5569	-2.82112				-0.5623	-2.81559		-0.5623	-2.82559		-0.5623
	-0.5749	-2.55037		-0.5729	-2.55037		-0.5749	-2.54807		-0.5742	-2.5496				-0.5491	-2.8041		-0.5491	-2.8141		-0.5491	-2.80217		-0.5491	-2.80679				-0.5561	-2.80939		-0.5561	-2.81939		-0.5561	-2.81939		-0.5561	-2.81605				-0.5614	-2.81079		-0.5614	-2.82079		-0.5614
	-0.5741	-2.54668		-0.5721	-2.54668		-0.5741	-2.54438		-0.5734	-2.54591				-0.5483	-2.79833		-0.5483	-2.80833		-0.5483	-2.79642		-0.5483	-2.80103				-0.5552	-2.80438		-0.5552	-2.81438		-0.5552	-2.81438		-0.5552	-2.81104				-0.5606	-2.80632		-0.5606	-2.81632		-0.5606
	-0.5732	-2.54303		-0.5712	-2.54303		-0.5732	-2.54073		-0.5725	-2.54226				-0.5475	-2.7929		-0.5475	-2.8029		-0.5475	-2.79102		-0.5475	-2.79561				-0.5544	-2.79915		-0.5544	-2.80915		-0.5544	-2.80915		-0.5544	-2.80582				-0.5598	-2.80134		-0.5598	-2.81134		-0.5598
	-0.5724	-2.53955		-0.5704	-2.53955		-0.5724	-2.53725		-0.5717	-2.53879				-0.5466	-2.78781		-0.5466	-2.79781		-0.5466	-2.78595		-0.5466	-2.79053				-0.5536	-2.79425		-0.5536	-2.80425		-0.5536	-2.80425		-0.5536	-2.80092				-0.5589	-2.7967		-0.5589	-2.8067		-0.5589
	-0.5716	-2.53626		-0.5696	-2.53626		-0.5716	-2.53396		-0.5709	-2.53549				-0.5458	-2.78252		-0.5458	-2.79252		-0.5458	-2.78068		-0.5458	-2.78524				-0.5527	-2.78941		-0.5527	-2.79941		-0.5527	-2.79941		-0.5527	-2.79608				-0.5581	-2.7921		-0.5581	-2.8021		-0.5581
	-0.5708	-2.53284		-0.5688	-2.53284		-0.5708	-2.53054		-0.5701	-2.53207				-0.545	-2.77754		-0.545	-2.78754		-0.545	-2.77573		-0.545	-2.78027				-0.5519	-2.78463		-0.5519	-2.79463		-0.5519	-2.79463		-0.5519	-2.79129				-0.5573	-2.78755		-0.5573	-2.79755		-0.5573
	-0.5699	-2.52915		-0.5679	-2.52915		-0.5699	-2.52685		-0.5692	-2.52838				-0.5441	-2.77211		-0.5441	-2.78211		-0.5441	-2.77032		-0.5441	-2.77485				-0.5511	-2.77989		-0.5511	-2.78989		-0.5511	-2.78989		-0.5511	-2.78656				-0.5565	-2.78304		-0.5565	-2.79304		-0.5565
	-0.5691	-2.52564		-0.5671	-2.52564		-0.5691	-2.52334		-0.5684	-2.52487				-0.5433	-2.767		-0.5433	-2.777		-0.5433	-2.76523		-0.5433	-2.76975				-0.5502	-2.77495		-0.5502	-2.78495		-0.5502	-2.78495		-0.5502	-2.78162				-0.5556	-2.77833		-0.5556	-2.78833		-0.5556
	-0.5683	-2.52244		-0.5663	-2.52244		-0.5683	-2.52014		-0.5676	-2.52168				-0.5425	-2.7617		-0.5425	-2.7717		-0.5425	-2.75995		-0.5425	-2.76445				-0.5494	-2.77006		-0.5494	-2.78006		-0.5494	-2.78006		-0.5494	-2.77673				-0.5548	-2.77366		-0.5548	-2.78366		-0.5548
	-0.5674	-2.51913		-0.5654	-2.51913		-0.5674	-2.51683		-0.5667	-2.51836				-0.5417	-2.75647		-0.5417	-2.76647		-0.5417	-2.75473		-0.5417	-2.75922				-0.5486	-2.76523		-0.5486	-2.77523		-0.5486	-2.77523		-0.5486	-2.7719				-0.554	-2.76904		-0.554	-2.77904		-0.554
	-0.5666	-2.5157		-0.5646	-2.5157		-0.5666	-2.5134		-0.5659	-2.51493				-0.5408	-2.75154		-0.5408	-2.76154		-0.5408	-2.74982		-0.5408	-2.7543				-0.5477	-2.7607		-0.5477	-2.7707		-0.5477	-2.7707		-0.5477	-2.76737				-0.5531	-2.76472		-0.5531	-2.77472		-0.5531
	-0.5658	-2.5123		-0.5638	-2.5123		-0.5658	-2.51		-0.5651	-2.51153				-0.54	-2.74618		-0.54	-2.75618		-0.54	-2.74449		-0.54	-2.74895				-0.5469	-2.75597		-0.5469	-2.76597		-0.5469	-2.76597		-0.5469	-2.76264				-0.5523	-2.76045		-0.5523	-2.77045		-0.5523
	-0.565	-2.50906		-0.563	-2.50906		-0.565	-2.50676		-0.5643	-2.50829				-0.5392	-2.74112		-0.5392	-2.75112		-0.5392	-2.73945		-0.5392	-2.7439				-0.5461	-2.75154		-0.5461	-2.76154		-0.5461	-2.76154		-0.5461	-2.7582				-0.5515	-2.75597		-0.5515	-2.76597		-0.5515
	-0.5641	-2.50598		-0.5621	-2.50598		-0.5641	-2.50368		-0.5634	-2.50522				-0.5384	-2.73589		-0.5384	-2.74589		-0.5384	-2.73424		-0.5384	-2.73867				-0.5453	-2.74642		-0.5453	-2.75642		-0.5453	-2.75642		-0.5453	-2.75309				-0.5506	-2.75154		-0.5506	-2.76154		-0.5506
	-0.5633	-2.50279		-0.5613	-2.50279		-0.5633	-2.50049		-0.5626	-2.50203				-0.5375	-2.73095		-0.5375	-2.74095		-0.5375	-2.72932		-0.5375	-2.73374				-0.5444	-2.7416		-0.5444	-2.7516		-0.5444	-2.7516		-0.5444	-2.74827				-0.5498	-2.74666		-0.5498	-2.75666		-0.5498
	-0.5625	-2.49963		-0.5605	-2.49963		-0.5625	-2.49733		-0.5618	-2.49886				-0.5367	-2.72607		-0.5367	-2.73607		-0.5367	-2.72446		-0.5367	-2.72887				-0.5436	-2.73707		-0.5436	-2.74707		-0.5436	-2.74707		-0.5436	-2.74374				-0.549	-2.74232		-0.549	-2.75232		-0.549
	-0.5616	-2.49635		-0.5596	-2.49635		-0.5616	-2.49405		-0.5609	-2.49558				-0.5358	-2.72125		-0.5358	-2.73125		-0.5358	-2.71965		-0.5358	-2.72405				-0.5428	-2.73259		-0.5428	-2.74259		-0.5428	-2.74259		-0.5428	-2.73926				-0.5481	-2.73802		-0.5481	-2.74802		-0.5481
	-0.5608	-2.49322		-0.5588	-2.49322		-0.5608	-2.49092		-0.5601	-2.49246				-0.535	-2.71647		-0.535	-2.72647		-0.535	-2.71489		-0.535	-2.71928				-0.5419	-2.72816		-0.5419	-2.73816		-0.5419	-2.73816		-0.5419	-2.73483				-0.5473	-2.73377		-0.5473	-2.74377		-0.5473
	-0.56	-2.49039		-0.558	-2.49039		-0.56	-2.48809		-0.5593	-2.48963				-0.5342	-2.71153		-0.5342	-2.72153		-0.5342	-2.70997		-0.5342	-2.71434				-0.5411	-2.72377		-0.5411	-2.73377		-0.5411	-2.73377		-0.5411	-2.73043				-0.5465	-2.72932		-0.5465	-2.73932		-0.5465
	-0.5591	-2.48718		-0.5571	-2.48718		-0.5591	-2.48488		-0.5584	-2.48642				-0.5333	-2.70642		-0.5333	-2.71642		-0.5333	-2.70487		-0.5333	-2.70924				-0.5403	-2.71919		-0.5403	-2.72919		-0.5403	-2.72919		-0.5403	-2.72586				-0.5457	-2.72492		-0.5457	-2.73492		-0.5457
	-0.5583	-2.48399		-0.5563	-2.48399		-0.5583	-2.48169		-0.5576	-2.48323				-0.5325	-2.70158		-0.5325	-2.71158		-0.5325	-2.70006		-0.5325	-2.70441				-0.5395	-2.71467		-0.5395	-2.72467		-0.5395	-2.72467		-0.5395	-2.72133				-0.5448	-2.72056		-0.5448	-2.73056		-0.5448
	-0.5575	-2.48096		-0.5555	-2.48096		-0.5575	-2.47866		-0.5568	-2.48019				-0.5317	-2.6968		-0.5317	-2.7068		-0.5317	-2.69529		-0.5317	-2.69963				-0.5386	-2.71019		-0.5386	-2.72019		-0.5386	-2.72019		-0.5386	-2.71685				-0.544	-2.71647		-0.544	-2.72647		-0.544
	-0.5566	-2.47808		-0.5546	-2.47808		-0.5566	-2.47578		-0.5559	-2.47731				-0.5309	-2.69229		-0.5309	-2.70229		-0.5309	-2.6908		-0.5309	-2.69513				-0.5378	-2.70597		-0.5378	-2.71597		-0.5378	-2.71597		-0.5378	-2.71264				-0.5432	-2.7122		-0.5432	-2.7222		-0.5432
	-0.5558	-2.47508		-0.5538	-2.47508		-0.5558	-2.47278		-0.5551	-2.47432				-0.53	-2.68761		-0.53	-2.69761		-0.53	-2.68613		-0.53	-2.69045				-0.5369	-2.70158		-0.5369	-2.71158		-0.5369	-2.71158		-0.5369	-2.70825				-0.5423	-2.70819		-0.5423	-2.71819		-0.5423
	-0.555	-2.47211		-0.553	-2.47211		-0.555	-2.46981		-0.5543	-2.47135				-0.5292	-2.68277		-0.5292	-2.69277		-0.5292	-2.68131		-0.5292	-2.68562				-0.5361	-2.69724		-0.5361	-2.70724		-0.5361	-2.70724		-0.5361	-2.7039				-0.5415	-2.70377		-0.5415	-2.71377		-0.5415
	-0.5542	-2.46903		-0.5522	-2.46903		-0.5542	-2.46673		-0.5535	-2.46827				-0.5284	-2.67799		-0.5284	-2.68799		-0.5284	-2.67654		-0.5284	-2.68084				-0.5353	-2.69272		-0.5353	-2.70272		-0.5353	-2.70272		-0.5353	-2.69938				-0.5407	-2.6994		-0.5407	-2.7094		-0.5407
	-0.5533	-2.4661		-0.5513	-2.4661		-0.5533	-2.4638		-0.5526	-2.46533				-0.5276	-2.67325		-0.5276	-2.68325		-0.5276	-2.67182		-0.5276	-2.67611				-0.5345	-2.68846		-0.5345	-2.69846		-0.5345	-2.69846		-0.5345	-2.69512				-0.5399	-2.69508		-0.5399	-2.70508		-0.5399
	-0.5525	-2.46344		-0.5505	-2.46344		-0.5525	-2.46114		-0.5518	-2.46267				-0.5267	-2.66878		-0.5267	-2.67878		-0.5267	-2.66736		-0.5267	-2.67164				-0.5336	-2.68403		-0.5336	-2.69403		-0.5336	-2.69403		-0.5336	-2.6907				-0.539	-2.69101		-0.539	-2.70101		-0.539
	-0.5517	-2.46055		-0.5497	-2.46055		-0.5517	-2.45825		-0.551	-2.45978				-0.5259	-2.66434		-0.5259	-2.67434		-0.5259	-2.66294		-0.5259	-2.66721				-0.5328	-2.68006		-0.5328	-2.69006		-0.5328	-2.69006		-0.5328	-2.68673				-0.5382	-2.68698		-0.5382	-2.69698		-0.5382
	-0.5508	-2.45767		-0.5488	-2.45767		-0.5508	-2.45537		-0.5501	-2.45691				-0.525	-2.65975		-0.525	-2.66975		-0.525	-2.65837		-0.525	-2.66263				-0.532	-2.67592		-0.532	-2.68592		-0.532	-2.68592		-0.532	-2.68259				-0.5373	-2.68298		-0.5373	-2.69298		-0.5373
	-0.55	-2.45469		-0.548	-2.45469		-0.55	-2.45239		-0.5493	-2.45393				-0.5242	-2.65521		-0.5242	-2.66521		-0.5242	-2.65384		-0.5242	-2.65809				-0.5311	-2.67162		-0.5311	-2.68162		-0.5311	-2.68162		-0.5311	-2.67829				-0.5365	-2.67882		-0.5365	-2.68882		-0.5365
	-0.5492	-2.45198		-0.5472	-2.45198		-0.5492	-2.44968		-0.5485	-2.45121				-0.5234	-2.65053		-0.5234	-2.66053		-0.5234	-2.64917		-0.5234	-2.65341				-0.5303	-2.66716		-0.5303	-2.67716		-0.5303	-2.67716		-0.5303	-2.67382				-0.5357	-2.67448		-0.5357	-2.68448		-0.5357
	-0.5483	-2.44928		-0.5463	-2.44928		-0.5483	-2.44698		-0.5476	-2.44852				-0.5226	-2.64608		-0.5226	-2.65608		-0.5226	-2.64474		-0.5226	-2.64897				-0.5295	-2.66294		-0.5295	-2.67294		-0.5295	-2.67294		-0.5295	-2.66961				-0.5349	-2.6704		-0.5349	-2.6804		-0.5349
	-0.5475	-2.44648		-0.5455	-2.44648		-0.5475	-2.44418		-0.5468	-2.44571				-0.5217	-2.64187		-0.5217	-2.65187		-0.5217	-2.64054		-0.5217	-2.64476				-0.5287	-2.65896		-0.5287	-2.66896		-0.5287	-2.66896		-0.5287	-2.66563				-0.534	-2.66635		-0.534	-2.67635		-0.534
	-0.5467	-2.4437		-0.5447	-2.4437		-0.5467	-2.4414		-0.546	-2.44293				-0.5209	-2.63752		-0.5209	-2.64752		-0.5209	-2.6362		-0.5209	-2.64041				-0.5278	-2.65482		-0.5278	-2.66482		-0.5278	-2.66482		-0.5278	-2.66149				-0.5332	-2.66254		-0.5332	-2.67254		-0.5332
	-0.5459	-2.44105		-0.5439	-2.44105		-0.5459	-2.43875		-0.5452	-2.44028				-0.5201	-2.6332		-0.5201	-2.6432		-0.5201	-2.6319		-0.5201	-2.6361				-0.527	-2.65072		-0.527	-2.66072		-0.527	-2.66072		-0.527	-2.65739				-0.5324	-2.65857		-0.5324	-2.66857		-0.5324
	-0.545	-2.43854		-0.543	-2.43854		-0.545	-2.43624		-0.5443	-2.43777				-0.5193	-2.62875		-0.5193	-2.63875		-0.5193	-2.62746		-0.5193	-2.63165				-0.5262	-2.64666		-0.5262	-2.65666		-0.5262	-2.65666		-0.5262	-2.65333				-0.5315	-2.65443		-0.5315	-2.66443		-0.5315
	-0.5442	-2.43593		-0.5422	-2.43593		-0.5442	-2.43363		-0.5435	-2.43516				-0.5184	-2.62434		-0.5184	-2.63434		-0.5184	-2.62306		-0.5184	-2.62724				-0.5253	-2.64226		-0.5253	-2.65226		-0.5253	-2.65226		-0.5253	-2.64892				-0.5307	-2.65033		-0.5307	-2.66033		-0.5307
	-0.5434	-2.43333		-0.5414	-2.43333		-0.5434	-2.43103		-0.5427	-2.43256				-0.5176	-2.62015		-0.5176	-2.63015		-0.5176	-2.61888		-0.5176	-2.62306				-0.5245	-2.63827		-0.5245	-2.64827		-0.5245	-2.64827		-0.5245	-2.64494				-0.5299	-2.64628		-0.5299	-2.65628		-0.5299
	-0.5425	-2.43063		-0.5405	-2.43063		-0.5425	-2.42833		-0.5418	-2.42986				-0.5168	-2.61601		-0.5168	-2.62601		-0.5168	-2.61475		-0.5168	-2.61892				-0.5237	-2.63432		-0.5237	-2.64432		-0.5237	-2.64432		-0.5237	-2.64099				-0.529	-2.64245		-0.529	-2.65245		-0.529
	-0.5417	-2.42806		-0.5397	-2.42806		-0.5417	-2.42576		-0.541	-2.42729				-0.5159	-2.6119		-0.5159	-2.6219		-0.5159	-2.61066		-0.5159	-2.61482				-0.5228	-2.63041		-0.5228	-2.64041		-0.5228	-2.64041		-0.5228	-2.63708				-0.5282	-2.63865		-0.5282	-2.64865		-0.5282
	-0.5409	-2.42562		-0.5389	-2.42562		-0.5409	-2.42332		-0.5402	-2.42485				-0.5151	-2.60765		-0.5151	-2.61765		-0.5151	-2.60642		-0.5151	-2.61058				-0.522	-2.62635		-0.522	-2.63635		-0.522	-2.63635		-0.522	-2.63302				-0.5274	-2.6347		-0.5274	-2.6447		-0.5274
	-0.5401	-2.42297		-0.5381	-2.42297		-0.5401	-2.42067		-0.5394	-2.4222				-0.5143	-2.60328		-0.5143	-2.61328		-0.5143	-2.60206		-0.5143	-2.60621				-0.5212	-2.62215		-0.5212	-2.63215		-0.5212	-2.63215		-0.5212	-2.62881				-0.5266	-2.6306		-0.5266	-2.6406		-0.5266
	-0.5392	-2.42033		-0.5372	-2.42033		-0.5392	-2.41803		-0.5385	-2.41956				-0.5134	-2.59894		-0.5134	-2.60894		-0.5134	-2.59774		-0.5134	-2.60188				-0.5203	-2.61816		-0.5203	-2.62816		-0.5203	-2.62816		-0.5203	-2.62483				-0.5257	-2.62654		-0.5257	-2.63654		-0.5257
	-0.5384	-2.41782		-0.5364	-2.41782		-0.5384	-2.41552		-0.5377	-2.41706				-0.5126	-2.595		-0.5126	-2.605		-0.5126	-2.5938		-0.5126	-2.59793				-0.5195	-2.61422		-0.5195	-2.62422		-0.5195	-2.62422		-0.5195	-2.62088				-0.5249	-2.62269		-0.5249	-2.63269		-0.5249
	-0.5375	-2.41544		-0.5355	-2.41544		-0.5375	-2.41314		-0.5368	-2.41468				-0.5118	-2.59108		-0.5118	-2.60108		-0.5118	-2.5899		-0.5118	-2.59402				-0.5187	-2.61048		-0.5187	-2.62048		-0.5187	-2.62048		-0.5187	-2.61715				-0.5241	-2.61907		-0.5241	-2.62907		-0.5241
	-0.5367	-2.41308		-0.5347	-2.41308		-0.5367	-2.41078		-0.536	-2.41231				-0.5109	-2.58704		-0.5109	-2.59704		-0.5109	-2.58586		-0.5109	-2.58998				-0.5179	-2.6066		-0.5179	-2.6166		-0.5179	-2.6166		-0.5179	-2.61327				-0.5232	-2.61529		-0.5232	-2.62529		-0.5232
	-0.5359	-2.41061		-0.5339	-2.41061		-0.5359	-2.40831		-0.5352	-2.40984				-0.5101	-2.58303		-0.5101	-2.59303		-0.5101	-2.58186		-0.5101	-2.58597				-0.517	-2.60258		-0.517	-2.61258		-0.517	-2.61258		-0.517	-2.60925				-0.5224	-2.61154		-0.5224	-2.62154		-0.5224
	-0.5351	-2.40805		-0.5331	-2.40805		-0.5351	-2.40575		-0.5344	-2.40728				-0.5093	-2.57889		-0.5093	-2.58889		-0.5093	-2.57774		-0.5093	-2.58184				-0.5162	-2.59843		-0.5162	-2.60843		-0.5162	-2.60843		-0.5162	-2.60509				-0.5216	-2.60765		-0.5216	-2.61765		-0.5216
	-0.5342	-2.40583		-0.5322	-2.40583		-0.5342	-2.40353		-0.5335	-2.40506				-0.5084	-2.57496		-0.5084	-2.58496		-0.5084	-2.57381		-0.5084	-2.57791				-0.5154	-2.59465		-0.5154	-2.60465		-0.5154	-2.60465		-0.5154	-2.60132				-0.5207	-2.60363		-0.5207	-2.61363		-0.5207
	-0.5334	-2.40362		-0.5314	-2.40362		-0.5334	-2.40132		-0.5327	-2.40286				-0.5076	-2.57106		-0.5076	-2.58106		-0.5076	-2.56992		-0.5076	-2.57401				-0.5145	-2.59074		-0.5145	-2.60074		-0.5145	-2.60074		-0.5145	-2.59741				-0.5199	-2.59998		-0.5199	-2.60998		-0.5199
	-0.5326	-2.40132		-0.5306	-2.40132		-0.5326	-2.39902		-0.5319	-2.40055				-0.5068	-2.56719		-0.5068	-2.57719		-0.5068	-2.56607		-0.5068	-2.57015				-0.5137	-2.5872		-0.5137	-2.5972		-0.5137	-2.5972		-0.5137	-2.59387				-0.5191	-2.59636		-0.5191	-2.60636		-0.5191
	-0.5318	-2.39881		-0.5298	-2.39881		-0.5318	-2.39651		-0.5311	-2.39804				-0.506	-2.56352		-0.506	-2.57352		-0.506	-2.56241		-0.506	-2.56648				-0.5129	-2.58353		-0.5129	-2.59353		-0.5129	-2.59353		-0.5129	-2.59019				-0.5183	-2.59278		-0.5183	-2.60278		-0.5183
	-0.5309	-2.39642		-0.5289	-2.39642		-0.5309	-2.39412		-0.5302	-2.39566				-0.5051	-2.55956		-0.5051	-2.56956		-0.5051	-2.55846		-0.5051	-2.56253				-0.512	-2.57971		-0.512	-2.58971		-0.512	-2.58971		-0.512	-2.58638				-0.5174	-2.58905		-0.5174	-2.59905		-0.5174
	-0.5301	-2.39426		-0.5281	-2.39426		-0.5301	-2.39196		-0.5294	-2.3935				-0.5043	-2.55549		-0.5043	-2.56549		-0.5043	-2.5544		-0.5043	-2.55846				-0.5112	-2.57577		-0.5112	-2.58577		-0.5112	-2.58577		-0.5112	-2.58244				-0.5166	-2.58519		-0.5166	-2.59519		-0.5166
	-0.5293	-2.39212		-0.5273	-2.39212		-0.5293	-2.38982		-0.5286	-2.39135				-0.5035	-2.55176		-0.5035	-2.56176		-0.5035	-2.55068		-0.5035	-2.55473				-0.5104	-2.57203		-0.5104	-2.58203		-0.5104	-2.58203		-0.5104	-2.57869				-0.5158	-2.58137		-0.5158	-2.59137		-0.5158
	-0.5284	-2.38977		-0.5264	-2.38977		-0.5284	-2.38747		-0.5277	-2.389				-0.5026	-2.54806		-0.5026	-2.55806		-0.5026	-2.54699		-0.5026	-2.55104				-0.5096	-2.56831		-0.5096	-2.57831		-0.5096	-2.57831		-0.5096	-2.57498				-0.5149	-2.5779		-0.5149	-2.5879		-0.5149
	-0.5276	-2.38732		-0.5256	-2.38732		-0.5276	-2.38502		-0.5269	-2.38656				-0.5018	-2.54455		-0.5018	-2.55455		-0.5018	-2.54348		-0.5018	-2.54752				-0.5087	-2.56495		-0.5087	-2.57495		-0.5087	-2.57495		-0.5087	-2.57162				-0.5141	-2.5743		-0.5141	-2.5843		-0.5141
	-0.5268	-2.38521		-0.5248	-2.38521		-0.5268	-2.38291		-0.5261	-2.38444				-0.501	-2.54076		-0.501	-2.55076		-0.501	-2.5397		-0.501	-2.54374				-0.5079	-2.5613		-0.5079	-2.5713		-0.5079	-2.5713		-0.5079	-2.56797				-0.5133	-2.57089		-0.5133	-2.58089		-0.5133
	-0.5259	-2.3831		-0.5239	-2.3831		-0.5259	-2.3808		-0.5252	-2.38234				-0.5002	-2.537		-0.5002	-2.547		-0.5002	-2.53596		-0.5002	-2.53999				-0.5071	-2.55752		-0.5071	-2.56752		-0.5071	-2.56752		-0.5071	-2.56419				-0.5125	-2.56735		-0.5125	-2.57735		-0.5125
	-0.5251	-2.38091		-0.5231	-2.38091		-0.5251	-2.37861		-0.5244	-2.38014				-0.4993	-2.53328		-0.4993	-2.54328		-0.4993	-2.53224		-0.4993	-2.53627				-0.5062	-2.55377		-0.5062	-2.56377		-0.5062	-2.56377		-0.5062	-2.56044				-0.5116	-2.56352		-0.5116	-2.57352		-0.5116
	-0.5243	-2.37851		-0.5223	-2.37851		-0.5243	-2.37621		-0.5236	-2.37775				-0.4985	-2.52959		-0.4985	-2.53959		-0.4985	-2.52856		-0.4985	-2.53258				-0.5054	-2.55021		-0.5054	-2.56021		-0.5054	-2.56021		-0.5054	-2.55688				-0.5108	-2.55988		-0.5108	-2.56988		-0.5108
	-0.5234	-2.37634		-0.5214	-2.37634		-0.5234	-2.37404		-0.5227	-2.37557				-0.4977	-2.52622		-0.4977	-2.53622		-0.4977	-2.5252		-0.4977	-2.52921				-0.5046	-2.54668		-0.5046	-2.55668		-0.5046	-2.55668		-0.5046	-2.55335				-0.5099	-2.55658		-0.5099	-2.56658		-0.5099
	-0.5226	-2.37428		-0.5206	-2.37428		-0.5226	-2.37198		-0.5219	-2.37351				-0.4968	-2.52259		-0.4968	-2.53259		-0.4968	-2.52158		-0.4968	-2.52559				-0.5037	-2.54333		-0.5037	-2.55333		-0.5037	-2.55333		-0.5037	-2.55				-0.5091	-2.55315		-0.5091	-2.56315		-0.5091
	-0.5218	-2.37222		-0.5198	-2.37222		-0.5218	-2.36992		-0.5211	-2.37146				-0.496	-2.51913		-0.496	-2.52913		-0.496	-2.51813		-0.496	-2.52213				-0.5029	-2.5397		-0.5029	-2.5497		-0.5029	-2.5497		-0.5029	-2.54637				-0.5083	-2.54975		-0.5083	-2.55975		-0.5083
	-0.521	-2.37008		-0.519	-2.37008		-0.521	-2.36778		-0.5203	-2.36931				-0.4952	-2.51556		-0.4952	-2.52556		-0.4952	-2.51456		-0.4952	-2.51856				-0.5021	-2.53611		-0.5021	-2.54611		-0.5021	-2.54611		-0.5021	-2.54277				-0.5075	-2.54622		-0.5075	-2.55622		-0.5075
	-0.5201	-2.36785		-0.5181	-2.36785		-0.5201	-2.36555		-0.5194	-2.36708				-0.4943	-2.51187		-0.4943	-2.52187		-0.4943	-2.51089		-0.4943	-2.51488				-0.5013	-2.53239		-0.5013	-2.54239		-0.5013	-2.54239		-0.5013	-2.53906				-0.5066	-2.54257		-0.5066	-2.55257		-0.5066
	-0.5193	-2.36583		-0.5173	-2.36583		-0.5193	-2.36353		-0.5186	-2.36506				-0.4935	-2.5085		-0.4935	-2.5185		-0.4935	-2.50752		-0.4935	-2.51151				-0.5004	-2.529		-0.5004	-2.539		-0.5004	-2.539		-0.5004	-2.53567				-0.5058	-2.5391		-0.5058	-2.5491		-0.5058
	-0.5185	-2.36391		-0.5165	-2.36391		-0.5185	-2.36161		-0.5178	-2.36315				-0.4927	-2.50515		-0.4927	-2.51515		-0.4927	-2.50418		-0.4927	-2.50816				-0.4996	-2.52564		-0.4996	-2.53564		-0.4996	-2.53564		-0.4996	-2.5323				-0.505	-2.53581		-0.505	-2.54581		-0.505
	-0.5176	-2.36181		-0.5156	-2.36181		-0.5176	-2.35951		-0.5169	-2.36104				-0.4918	-2.50183		-0.4918	-2.51183		-0.4918	-2.50086		-0.4918	-2.50484				-0.4987	-2.5223		-0.4987	-2.5323		-0.4987	-2.5323		-0.4987	-2.52897				-0.5042	-2.53269		-0.5042	-2.54269		-0.5042
	-0.5168	-2.35962		-0.5148	-2.35962		-0.5168	-2.35732		-0.5161	-2.35885				-0.491	-2.49853		-0.491	-2.50853		-0.491	-2.49757		-0.491	-2.50154				-0.4979	-2.51899		-0.4979	-2.52899		-0.4979	-2.52899		-0.4979	-2.52565				-0.5033	-2.5293		-0.5033	-2.5393		-0.5033
	-0.516	-2.35754		-0.514	-2.35754		-0.516	-2.35524		-0.5153	-2.35677				-0.4902	-2.49499		-0.4902	-2.50499		-0.4902	-2.49404		-0.4902	-2.498				-0.4971	-2.51542		-0.4971	-2.52542		-0.4971	-2.52542		-0.4971	-2.52208				-0.5025	-2.52593		-0.5025	-2.53593		-0.5025
	-0.5151	-2.35576		-0.5131	-2.35576		-0.5151	-2.35346		-0.5144	-2.35499				-0.4894	-2.49147		-0.4894	-2.50147		-0.4894	-2.49053		-0.4894	-2.49449				-0.4963	-2.51187		-0.4963	-2.52187		-0.4963	-2.52187		-0.4963	-2.51854				-0.5017	-2.52244		-0.5017	-2.53244		-0.5017
	-0.5143	-2.35389		-0.5123	-2.35389		-0.5143	-2.35159		-0.5136	-2.35312				-0.4885	-2.48825		-0.4885	-2.49825		-0.4885	-2.48732		-0.4885	-2.49127				-0.4954	-2.50864		-0.4954	-2.51864		-0.4954	-2.51864		-0.4954	-2.5153				-0.5008	-2.51913		-0.5008	-2.52913		-0.5008
	-0.5135	-2.35193		-0.5115	-2.35193		-0.5135	-2.34963		-0.5128	-2.35117				-0.4877	-2.48505		-0.4877	-2.49505		-0.4877	-2.48413		-0.4877	-2.48808				-0.4946	-2.50543		-0.4946	-2.51543		-0.4946	-2.51543		-0.4946	-2.51209				-0.5	-2.51613		-0.5	-2.52613		-0.5
	-0.5127	-2.34979		-0.5107	-2.34979		-0.5127	-2.34749		-0.512	-2.34902				-0.4869	-2.48201		-0.4869	-2.49201		-0.4869	-2.48109		-0.4869	-2.48504				-0.4938	-2.50224		-0.4938	-2.51224		-0.4938	-2.51224		-0.4938	-2.50891				-0.4991	-2.51286		-0.4991	-2.52286		-0.4991
	-0.5118	-2.34795		-0.5098	-2.34795		-0.5118	-2.34565		-0.5111	-2.34718				-0.486	-2.47873		-0.486	-2.48873		-0.486	-2.47782		-0.486	-2.48176				-0.4929	-2.49894		-0.4929	-2.50894		-0.4929	-2.50894		-0.4929	-2.50561				-0.4983	-2.50962		-0.4983	-2.51962		-0.4983
	-0.511	-2.34621		-0.509	-2.34621		-0.511	-2.34391		-0.5103	-2.34544				-0.4852	-2.47521		-0.4852	-2.48521		-0.4852	-2.47431		-0.4852	-2.47825				-0.4921	-2.49539		-0.4921	-2.50539		-0.4921	-2.50539		-0.4921	-2.50206				-0.4975	-2.5064		-0.4975	-2.5164		-0.4975
	-0.5102	-2.34448		-0.5082	-2.34448		-0.5102	-2.34218		-0.5095	-2.34371				-0.4844	-2.47198		-0.4844	-2.48198		-0.4844	-2.47108		-0.4844	-2.47502				-0.4913	-2.49214		-0.4913	-2.50214		-0.4913	-2.50214		-0.4913	-2.49881				-0.4967	-2.50307		-0.4967	-2.51307		-0.4967
	-0.5093	-2.34247		-0.5073	-2.34247		-0.5093	-2.34017		-0.5086	-2.3417				-0.4835	-2.46903		-0.4835	-2.47903		-0.4835	-2.46814		-0.4835	-2.47207				-0.4905	-2.48905		-0.4905	-2.49905		-0.4905	-2.49905		-0.4905	-2.49572				-0.4958	-2.4999		-0.4958	-2.5099		-0.4958
	-0.5085	-2.34056		-0.5065	-2.34056		-0.5085	-2.33826		-0.5078	-2.33979				-0.4827	-2.46597		-0.4827	-2.47597		-0.4827	-2.46509		-0.4827	-2.46901				-0.4896	-2.48598		-0.4896	-2.49598		-0.4896	-2.49598		-0.4896	-2.49265				-0.495	-2.49703		-0.495	-2.50703		-0.495
	-0.5077	-2.33885		-0.5057	-2.33885		-0.5077	-2.33655		-0.507	-2.33808				-0.4819	-2.46294		-0.4819	-2.47294		-0.4819	-2.46206		-0.4819	-2.46598				-0.4888	-2.4828		-0.4888	-2.4928		-0.4888	-2.4928		-0.4888	-2.48947				-0.4942	-2.4939		-0.4942	-2.5039		-0.4942
	-0.5068	-2.33724		-0.5048	-2.33724		-0.5068	-2.33494		-0.5061	-2.33648				-0.4811	-2.4598		-0.4811	-2.4698		-0.4811	-2.45892		-0.4811	-2.46284				-0.488	-2.47965		-0.488	-2.48965		-0.488	-2.48965		-0.488	-2.48631				-0.4934	-2.4908		-0.4934	-2.5008		-0.4934
	-0.506	-2.33555		-0.504	-2.33555		-0.506	-2.33325		-0.5053	-2.33478				-0.4802	-2.45655		-0.4802	-2.46655		-0.4802	-2.45568		-0.4802	-2.4596				-0.4871	-2.47625		-0.4871	-2.48625		-0.4871	-2.48625		-0.4871	-2.48292				-0.4925	-2.48758		-0.4925	-2.49758		-0.4925
	-0.5052	-2.33367		-0.5032	-2.33367		-0.5052	-2.33137		-0.5045	-2.3329				-0.4794	-2.45346		-0.4794	-2.46346		-0.4794	-2.45259		-0.4794	-2.4565				-0.4863	-2.47314		-0.4863	-2.48314		-0.4863	-2.48314		-0.4863	-2.47981				-0.4917	-2.48439		-0.4917	-2.49439		-0.4917
	-0.5043	-2.33199		-0.5023	-2.33199		-0.5043	-2.32969		-0.5036	-2.33122				-0.4786	-2.45051		-0.4786	-2.46051		-0.4786	-2.44965		-0.4786	-2.45355				-0.4855	-2.47031		-0.4855	-2.48031		-0.4855	-2.48031		-0.4855	-2.47698				-0.4909	-2.48162		-0.4909	-2.49162		-0.4909
	-0.5035	-2.3305		-0.5015	-2.3305		-0.5035	-2.3282		-0.5028	-2.32973				-0.4778	-2.44758		-0.4778	-2.45758		-0.4778	-2.44672		-0.4778	-2.45062				-0.4846	-2.46737		-0.4846	-2.47737		-0.4846	-2.47737		-0.4846	-2.47404				-0.4901	-2.4786		-0.4901	-2.4886		-0.4901
	-0.5027	-2.32883		-0.5007	-2.32883		-0.5027	-2.32653		-0.502	-2.32806				-0.4769	-2.44466		-0.4769	-2.45466		-0.4769	-2.44382		-0.4769	-2.44772				-0.4838	-2.46433		-0.4838	-2.47433		-0.4838	-2.47433		-0.4838	-2.47099				-0.4892	-2.47573		-0.4892	-2.48573		-0.4892
	-0.5019	-2.32707		-0.4999	-2.32707		-0.5019	-2.32477		-0.5012	-2.3263				-0.4761	-2.44153		-0.4761	-2.45153		-0.4761	-2.44069		-0.4761	-2.44458				-0.483	-2.4613		-0.483	-2.4713		-0.483	-2.4713		-0.483	-2.46797				-0.4884	-2.47263		-0.4884	-2.48263		-0.4884
	-0.501	-2.32541		-0.499	-2.32541		-0.501	-2.32311		-0.5003	-2.32465				-0.4753	-2.43842		-0.4753	-2.44842		-0.4753	-2.43759		-0.4753	-2.44148				-0.4822	-2.45805		-0.4822	-2.46805		-0.4822	-2.46805		-0.4822	-2.46471				-0.4875	-2.46954		-0.4875	-2.47954		-0.4875
	-0.5002	-2.32404		-0.4982	-2.32404		-0.5002	-2.32174		-0.4995	-2.32327				-0.4744	-2.43545		-0.4744	-2.44545		-0.4744	-2.43462		-0.4744	-2.43851				-0.4813	-2.45519		-0.4813	-2.46519		-0.4813	-2.46519		-0.4813	-2.46185				-0.4867	-2.46661		-0.4867	-2.47661		-0.4867
	-0.4994	-2.32276		-0.4974	-2.32276		-0.4994	-2.32046		-0.4987	-2.32199				-0.4736	-2.43262		-0.4736	-2.44262		-0.4736	-2.4318		-0.4736	-2.43568				-0.4805	-2.45235		-0.4805	-2.46235		-0.4805	-2.46235		-0.4805	-2.45902				-0.4859	-2.46382		-0.4859	-2.47382		-0.4859
	-0.4985	-2.3213		-0.4965	-2.3213		-0.4985	-2.319		-0.4978	-2.32053				-0.4727	-2.42981		-0.4727	-2.43981		-0.4727	-2.42899		-0.4727	-2.43287				-0.4797	-2.44953		-0.4797	-2.45953		-0.4797	-2.45953		-0.4797	-2.45619				-0.485	-2.46092		-0.485	-2.47092		-0.485
	-0.4977	-2.31976		-0.4957	-2.31976		-0.4977	-2.31746		-0.497	-2.31899				-0.4719	-2.42701		-0.4719	-2.43701		-0.4719	-2.4262		-0.4719	-2.43008				-0.4789	-2.4466		-0.4789	-2.4566		-0.4789	-2.4566		-0.4789	-2.45327				-0.4842	-2.45817		-0.4842	-2.46817		-0.4842
	-0.4969	-2.31831		-0.4949	-2.31831		-0.4969	-2.31601		-0.4962	-2.31754				-0.4711	-2.42389		-0.4711	-2.43389		-0.4711	-2.42308		-0.4711	-2.42695				-0.478	-2.44346		-0.478	-2.45346		-0.478	-2.45346		-0.478	-2.45012				-0.4834	-2.45519		-0.4834	-2.46519		-0.4834
	-0.496	-2.31722		-0.494	-2.31722		-0.496	-2.31492		-0.4953	-2.31646				-0.4703	-2.4209		-0.4703	-2.4309		-0.4703	-2.4201		-0.4703	-2.42397				-0.4772	-2.44033		-0.4772	-2.45033		-0.4772	-2.45033		-0.4772	-2.447				-0.4826	-2.4521		-0.4826	-2.4621		-0.4826
	-0.4952	-2.31605		-0.4932	-2.31605		-0.4952	-2.31375		-0.4945	-2.31529				-0.4694	-2.41816		-0.4694	-2.42816		-0.4694	-2.41737		-0.4694	-2.42123				-0.4764	-2.43759		-0.4764	-2.44759		-0.4764	-2.44759		-0.4764	-2.44425				-0.4817	-2.44928		-0.4817	-2.45928		-0.4817
	-0.4944	-2.3148		-0.4924	-2.3148		-0.4944	-2.3125		-0.4937	-2.31403				-0.4686	-2.41544		-0.4686	-2.42544		-0.4686	-2.41465		-0.4686	-2.41851				-0.4755	-2.43486		-0.4755	-2.44486		-0.4755	-2.44486		-0.4755	-2.44153				-0.4809	-2.4466		-0.4809	-2.4566		-0.4809
	-0.4936	-2.31363		-0.4916	-2.31363		-0.4936	-2.31133		-0.4929	-2.31287				-0.4678	-2.41274		-0.4678	-2.42274		-0.4678	-2.41195		-0.4678	-2.41581				-0.4747	-2.43215		-0.4747	-2.44215		-0.4747	-2.44215		-0.4747	-2.43882				-0.4801	-2.44394		-0.4801	-2.45394		-0.4801
	-0.4927	-2.31274		-0.4907	-2.31274		-0.4927	-2.31044		-0.492	-2.31197				-0.467	-2.40994		-0.467	-2.41994		-0.467	-2.40916		-0.467	-2.41301				-0.4739	-2.42922		-0.4739	-2.43922		-0.4739	-2.43922		-0.4739	-2.43589				-0.4793	-2.44105		-0.4793	-2.45105		-0.4793
	-0.4919	-2.31194		-0.4899	-2.31194		-0.4919	-2.30964		-0.4912	-2.31117				-0.4661	-2.40694		-0.4661	-2.41694		-0.4661	-2.40616		-0.4661	-2.41001				-0.473	-2.4262		-0.473	-2.4362		-0.473	-2.4362		-0.473	-2.43287				-0.4784	-2.43818		-0.4784	-2.44818		-0.4784
	-0.4911	-2.31131		-0.4891	-2.31131		-0.4911	-2.30901		-0.4904	-2.31055				-0.4653	-2.40406		-0.4653	-2.41406		-0.4653	-2.40329		-0.4653	-2.40714				-0.4722	-2.42331		-0.4722	-2.43331		-0.4722	-2.43331		-0.4722	-2.42998				-0.4776	-2.43533		-0.4776	-2.44533		-0.4776
	-0.4903	-2.31051		-0.4883	-2.31051		-0.4903	-2.30821		-0.4896	-2.30975				-0.4645	-2.40143		-0.4645	-2.41143		-0.4645	-2.40066		-0.4645	-2.40451				-0.4714	-2.42067		-0.4714	-2.43067		-0.4714	-2.43067		-0.4714	-2.42734				-0.4768	-2.43262		-0.4768	-2.44262		-0.4768
	-0.4894	-2.30989		-0.4874	-2.30989		-0.4894	-2.30759		-0.4887	-2.30913				-0.4636	-2.39881		-0.4636	-2.40881		-0.4636	-2.39805		-0.4636	-2.40189				-0.4705	-2.41805		-0.4705	-2.42805		-0.4705	-2.42805		-0.4705	-2.42472				-0.4759	-2.43004		-0.4759	-2.44004		-0.4759
	-0.4886	-2.30954		-0.4866	-2.30954		-0.4886	-2.30724		-0.4879	-2.30877				-0.4628	-2.39621		-0.4628	-2.40621		-0.4628	-2.39545		-0.4628	-2.39929				-0.4697	-2.41533		-0.4697	-2.42533		-0.4697	-2.42533		-0.4697	-2.422				-0.4751	-2.42736		-0.4751	-2.43736		-0.4751
	-0.4877	-2.3091		-0.4857	-2.3091		-0.4877	-2.3068		-0.487	-2.30833				-0.462	-2.39351		-0.462	-2.40351		-0.462	-2.39276		-0.462	-2.39659				-0.4689	-2.4124		-0.4689	-2.4224		-0.4689	-2.4224		-0.4689	-2.41907				-0.4743	-2.42458		-0.4743	-2.43458		-0.4743
	-0.4869	-2.30865		-0.4849	-2.30865		-0.4869	-2.30635		-0.4862	-2.30789				-0.4611	-2.39051		-0.4611	-2.40051		-0.4611	-2.38977		-0.4611	-2.3936				-0.4681	-2.40949		-0.4681	-2.41949		-0.4681	-2.41949		-0.4681	-2.41616				-0.4734	-2.4217		-0.4734	-2.4317		-0.4734
	-0.4861	-2.30812		-0.4841	-2.30812		-0.4861	-2.30582		-0.4854	-2.30736				-0.4603	-2.38775		-0.4603	-2.39775		-0.4603	-2.387		-0.4603	-2.39083				-0.4672	-2.40671		-0.4672	-2.41671		-0.4672	-2.41671		-0.4672	-2.41338				-0.4726	-2.41896		-0.4726	-2.42896		-0.4726
	-0.4853	-2.30795		-0.4833	-2.30795		-0.4853	-2.30565		-0.4846	-2.30718				-0.4595	-2.38521		-0.4595	-2.39521		-0.4595	-2.38447		-0.4595	-2.3883				-0.4664	-2.40417		-0.4664	-2.41417		-0.4664	-2.41417		-0.4664	-2.41084				-0.4718	-2.41646		-0.4718	-2.42646		-0.4718
	-0.4844	-2.30795		-0.4824	-2.30795		-0.4844	-2.30565		-0.4837	-2.30718				-0.4586	-2.38279		-0.4586	-2.39279		-0.4586	-2.38206		-0.4586	-2.38588				-0.4656	-2.40165		-0.4656	-2.41165		-0.4656	-2.41165		-0.4656	-2.40831				-0.4709	-2.41386		-0.4709	-2.42386		-0.4709
	-0.4836	-2.30786		-0.4816	-2.30786		-0.4836	-2.30556		-0.4829	-2.30709				-0.4578	-2.38018		-0.4578	-2.39018		-0.4578	-2.37945		-0.4578	-2.38327				-0.4647	-2.39903		-0.4647	-2.40903		-0.4647	-2.40903		-0.4647	-2.40569				-0.4701	-2.41128		-0.4701	-2.42128		-0.4701
	-0.4828	-2.30786		-0.4808	-2.30786		-0.4828	-2.30556		-0.4821	-2.30709				-0.457	-2.37748		-0.457	-2.38748		-0.457	-2.37675		-0.457	-2.38057				-0.4639	-2.39621		-0.4639	-2.40621		-0.4639	-2.40621		-0.4639	-2.40287				-0.4693	-2.4086		-0.4693	-2.4186		-0.4693
	-0.4819	-2.30795		-0.4799	-2.30795		-0.4819	-2.30565		-0.4812	-2.30718				-0.4562	-2.37458		-0.4562	-2.38458		-0.4562	-2.37387		-0.4562	-2.37768				-0.4631	-2.3934		-0.4631	-2.4034		-0.4631	-2.4034		-0.4631	-2.40007				-0.4685	-2.40583		-0.4685	-2.41583		-0.4685
	-0.4811	-2.3083		-0.4791	-2.3083		-0.4811	-2.306		-0.4804	-2.30753				-0.4553	-2.37202		-0.4553	-2.38202		-0.4553	-2.3713		-0.4553	-2.37511				-0.4623	-2.39083		-0.4623	-2.40083		-0.4623	-2.40083		-0.4623	-2.3975				-0.4676	-2.40318		-0.4676	-2.41318		-0.4676
	-0.4803	-2.30874		-0.4783	-2.30874		-0.4803	-2.30644		-0.4796	-2.30797				-0.4545	-2.36957		-0.4545	-2.37957		-0.4545	-2.36886		-0.4545	-2.37267				-0.4614	-2.38838		-0.4614	-2.39838		-0.4614	-2.39838		-0.4614	-2.39505				-0.4668	-2.40077		-0.4668	-2.41077		-0.4668
	-0.4794	-2.30901		-0.4774	-2.30901		-0.4794	-2.30671		-0.4787	-2.30824				-0.4537	-2.36714		-0.4537	-2.37714		-0.4537	-2.36643		-0.4537	-2.37024				-0.4606	-2.38595		-0.4606	-2.39595		-0.4606	-2.39595		-0.4606	-2.39261				-0.466	-2.39837		-0.466	-2.40837		-0.466
	-0.4786	-2.30927		-0.4766	-2.30927		-0.4786	-2.30697		-0.4779	-2.30851				-0.4528	-2.36462		-0.4528	-2.37462		-0.4528	-2.36391		-0.4528	-2.36772				-0.4597	-2.38331		-0.4597	-2.39331		-0.4597	-2.39331		-0.4597	-2.38998				-0.4651	-2.39577		-0.4651	-2.40577		-0.4651
	-0.4778	-2.30972		-0.4758	-2.30972		-0.4778	-2.30742		-0.4771	-2.30895				-0.452	-2.36201		-0.452	-2.37201		-0.452	-2.36131		-0.452	-2.36511				-0.4589	-2.38059		-0.4589	-2.39059		-0.4589	-2.39059		-0.4589	-2.38726				-0.4643	-2.39319		-0.4643	-2.40319		-0.4643
	-0.477	-2.31025		-0.475	-2.31025		-0.477	-2.30795		-0.4763	-2.30948				-0.4512	-2.35922		-0.4512	-2.36922		-0.4512	-2.35853		-0.4512	-2.36232				-0.4581	-2.37789		-0.4581	-2.38789		-0.4581	-2.38789		-0.4581	-2.38456				-0.4635	-2.39051		-0.4635	-2.40051		-0.4635
	-0.4761	-2.31087		-0.4741	-2.31087		-0.4761	-2.30857		-0.4754	-2.3101				-0.4504	-2.35674		-0.4504	-2.36674		-0.4504	-2.35605		-0.4504	-2.35985				-0.4573	-2.37541		-0.4573	-2.38541		-0.4573	-2.38541		-0.4573	-2.38208				-0.4627	-2.38796		-0.4627	-2.39796		-0.4627
	-0.4753	-2.31114		-0.4733	-2.31114		-0.4753	-2.30884		-0.4746	-2.31037				-0.4495	-2.35438		-0.4495	-2.36438		-0.4495	-2.35369		-0.4495	-2.35749				-0.4564	-2.37304		-0.4564	-2.38304		-0.4564	-2.38304		-0.4564	-2.37971				-0.4618	-2.38563		-0.4618	-2.39563		-0.4618
	-0.4745	-2.31158		-0.4725	-2.31158		-0.4745	-2.30928		-0.4738	-2.31081				-0.4487	-2.35193		-0.4487	-2.36193		-0.4487	-2.35125		-0.4487	-2.35504				-0.4556	-2.37069		-0.4556	-2.38069		-0.4556	-2.38069		-0.4556	-2.37736				-0.461	-2.38331		-0.461	-2.39331		-0.461
	-0.4736	-2.31229		-0.4716	-2.31229		-0.4736	-2.30999		-0.4729	-2.31153				-0.4478	-2.3496		-0.4478	-2.3596		-0.4478	-2.34892		-0.4478	-2.3527				-0.4548	-2.36815		-0.4548	-2.37815		-0.4548	-2.37815		-0.4548	-2.37482				-0.4601	-2.38091		-0.4601	-2.39091		-0.4601
	-0.4728	-2.31292		-0.4708	-2.31292		-0.4728	-2.31062		-0.4721	-2.31215				-0.447	-2.34698		-0.447	-2.35698		-0.447	-2.34631		-0.447	-2.35009				-0.4539	-2.36542		-0.4539	-2.37542		-0.4539	-2.37542		-0.4539	-2.37209				-0.4593	-2.3783		-0.4593	-2.3883		-0.4593
	-0.472	-2.31354		-0.47	-2.31354		-0.472	-2.31124		-0.4713	-2.31278				-0.4462	-2.34429		-0.4462	-2.35429		-0.4462	-2.34361		-0.4462	-2.3474				-0.4531	-2.36281		-0.4531	-2.37281		-0.4531	-2.37281		-0.4531	-2.36948				-0.4585	-2.37572		-0.4585	-2.38572		-0.4585
	-0.4712	-2.3139		-0.4692	-2.3139		-0.4712	-2.3116		-0.4705	-2.31313				-0.4454	-2.34189		-0.4454	-2.35189		-0.4454	-2.34123		-0.4454	-2.345				-0.4523	-2.36051		-0.4523	-2.37051		-0.4523	-2.37051		-0.4523	-2.36718				-0.4577	-2.37325		-0.4577	-2.38325		-0.4577
	-0.4703	-2.31453		-0.4683	-2.31453		-0.4703	-2.31223		-0.4696	-2.31376				-0.4445	-2.33961		-0.4445	-2.34961		-0.4445	-2.33894		-0.4445	-2.34272				-0.4515	-2.35823		-0.4515	-2.36823		-0.4515	-2.36823		-0.4515	-2.3649				-0.4568	-2.371		-0.4568	-2.381		-0.4568
	-0.4695	-2.31524		-0.4675	-2.31524		-0.4695	-2.31294		-0.4688	-2.31448				-0.4437	-2.33734		-0.4437	-2.34734		-0.4437	-2.33668		-0.4437	-2.34045				-0.4506	-2.35586		-0.4506	-2.36586		-0.4506	-2.36586		-0.4506	-2.36252				-0.456	-2.36866		-0.456	-2.37866		-0.456
	-0.4687	-2.31578		-0.4667	-2.31578		-0.4687	-2.31348		-0.468	-2.31502				-0.4429	-2.33489		-0.4429	-2.34489		-0.4429	-2.33423		-0.4429	-2.338				-0.4498	-2.3533		-0.4498	-2.3633		-0.4498	-2.3633		-0.4498	-2.35997				-0.4552	-2.36623		-0.4552	-2.37623		-0.4552
	-0.4678	-2.31623		-0.4658	-2.31623		-0.4678	-2.31393		-0.4671	-2.31547				-0.4421	-2.33236		-0.4421	-2.34236		-0.4421	-2.33171		-0.4421	-2.33548				-0.449	-2.35057		-0.449	-2.36057		-0.449	-2.36057		-0.449	-2.35723				-0.4544	-2.36371		-0.4544	-2.37371		-0.4544
	-0.467	-2.3165		-0.465	-2.3165		-0.467	-2.3142		-0.4663	-2.31574				-0.4412	-2.32985		-0.4412	-2.33985		-0.4412	-2.3292		-0.4412	-2.33296				-0.4481	-2.34814		-0.4481	-2.35814		-0.4481	-2.35814		-0.4481	-2.35481				-0.4535	-2.36111		-0.4535	-2.37111		-0.4535
	-0.4662	-2.31695		-0.4642	-2.31695		-0.4662	-2.31465		-0.4655	-2.31619				-0.4404	-2.32753		-0.4404	-2.33753		-0.4404	-2.32689		-0.4404	-2.33065				-0.4473	-2.34592		-0.4473	-2.35592		-0.4473	-2.35592		-0.4473	-2.35259				-0.4527	-2.35882		-0.4527	-2.36882		-0.4527
	-0.4653	-2.31731		-0.4633	-2.31731		-0.4653	-2.31501		-0.4646	-2.31655				-0.4396	-2.32541		-0.4396	-2.33541		-0.4396	-2.32477		-0.4396	-2.32853				-0.4465	-2.34361		-0.4465	-2.35361		-0.4465	-2.35361		-0.4465	-2.35028				-0.4519	-2.35665		-0.4519	-2.36665		-0.4519
	-0.4645	-2.3174		-0.4625	-2.3174		-0.4645	-2.3151		-0.4638	-2.31664				-0.4387	-2.32303		-0.4387	-2.33303		-0.4387	-2.32239		-0.4387	-2.32615				-0.4456	-2.34132		-0.4456	-2.35132		-0.4456	-2.35132		-0.4456	-2.34799				-0.451	-2.35438		-0.451	-2.36438		-0.451
	-0.4637	-2.31713		-0.4617	-2.31713		-0.4637	-2.31483		-0.463	-2.31637				-0.4379	-2.32075		-0.4379	-2.33075		-0.4379	-2.32012		-0.4379	-2.32388				-0.4448	-2.33885		-0.4448	-2.34885		-0.4448	-2.34885		-0.4448	-2.34552				-0.4502	-2.35203		-0.4502	-2.36203		-0.4502
	-0.4629	-2.31704		-0.4609	-2.31704		-0.4629	-2.31474		-0.4622	-2.31628				-0.4371	-2.31813		-0.4371	-2.32813		-0.4371	-2.31749		-0.4371	-2.32125				-0.444	-2.33639		-0.444	-2.34639		-0.444	-2.34639		-0.444	-2.34306				-0.4494	-2.3494		-0.4494	-2.3594		-0.4494
	-0.462	-2.31695		-0.46	-2.31695		-0.462	-2.31465		-0.4613	-2.31619				-0.4362	-2.31578		-0.4362	-2.32578		-0.4362	-2.31515		-0.4362	-2.31891				-0.4431	-2.33404		-0.4431	-2.34404		-0.4431	-2.34404		-0.4431	-2.34071				-0.4485	-2.34698		-0.4485	-2.35698		-0.4485
	-0.4612	-2.31677		-0.4592	-2.31677		-0.4612	-2.31447		-0.4605	-2.31601				-0.4354	-2.31363		-0.4354	-2.32363		-0.4354	-2.31301		-0.4354	-2.31676				-0.4423	-2.33189		-0.4423	-2.34189		-0.4423	-2.34189		-0.4423	-2.33856				-0.4477	-2.34477		-0.4477	-2.35477		-0.4477
	-0.4604	-2.31641		-0.4584	-2.31641		-0.4604	-2.31411		-0.4597	-2.31565				-0.4346	-2.3114		-0.4346	-2.3214		-0.4346	-2.31078		-0.4346	-2.31453				-0.4415	-2.32957		-0.4415	-2.33957		-0.4415	-2.33957		-0.4415	-2.33624				-0.4469	-2.34256		-0.4469	-2.35256		-0.4469
	-0.4595	-2.31587		-0.4575	-2.31587		-0.4595	-2.31357		-0.4588	-2.31511				-0.4337	-2.30918		-0.4337	-2.31918		-0.4337	-2.30856		-0.4337	-2.31231				-0.4407	-2.32726		-0.4407	-2.33726		-0.4407	-2.33726		-0.4407	-2.33392				-0.4461	-2.34037		-0.4461	-2.35037		-0.4461
	-0.4587	-2.3156		-0.4567	-2.3156		-0.4587	-2.3133		-0.458	-2.31484				-0.4329	-2.30689		-0.4329	-2.31689		-0.4329	-2.30627		-0.4329	-2.31002				-0.4398	-2.32477		-0.4398	-2.33477		-0.4398	-2.33477		-0.4398	-2.33144				-0.4452	-2.338		-0.4452	-2.348		-0.4452
	-0.4579	-2.31524		-0.4559	-2.31524		-0.4579	-2.31294		-0.4572	-2.31448				-0.4321	-2.30434		-0.4321	-2.31434		-0.4321	-2.30373		-0.4321	-2.30747				-0.439	-2.32221		-0.439	-2.33221		-0.439	-2.33221		-0.439	-2.32888				-0.4444	-2.33555		-0.4444	-2.34555		-0.4444
	-0.457	-2.31471		-0.455	-2.31471		-0.457	-2.31241		-0.4563	-2.31394				-0.4313	-2.30207		-0.4313	-2.31207		-0.4313	-2.30146		-0.4313	-2.3052				-0.4382	-2.32003		-0.4382	-2.33003		-0.4382	-2.33003		-0.4382	-2.32669				-0.4436	-2.33329		-0.4436	-2.34329		-0.4436
	-0.4562	-2.31408		-0.4542	-2.31408		-0.4562	-2.31178		-0.4555	-2.31331				-0.4304	-2.29999		-0.4304	-2.30999		-0.4304	-2.29938		-0.4304	-2.30312				-0.4373	-2.31795		-0.4373	-2.32795		-0.4373	-2.32795		-0.4373	-2.32461				-0.4427	-2.33115		-0.4427	-2.34115		-0.4427
[truncated: 31 more columns]

## Sheet: FTIR
650.42	75.8846	2016-06-22	650.42	78.1013	2016-06-30	650.42	78.2111	2016-07-02
652.284	76.1621		652.284	78.3869		652.284	78.4971
654.148	76.4614		654.148	78.6949		654.148	78.8056
656.011	76.8557		656.011	79.1007		656.011	79.2119
657.875	77.0572		657.875	79.3081		657.875	79.4196
659.739	77.144		659.739	79.3974		659.739	79.5091
661.602	77.1898		661.602	79.4446		661.602	79.5563
663.466	77.2095		663.466	79.4648		663.466	79.5765
665.33	77.3233		665.33	79.5819		665.33	79.6939
667.193	77.3204		667.193	79.579		667.193	79.6909
669.057	77.2455		669.057	79.5019		669.057	79.6137
670.921	77.2982		670.921	79.5562		670.921	79.6681
672.784	77.2039		672.784	79.459		672.784	79.5708
674.648	77.0107		674.648	79.2603		674.648	79.3717
676.512	76.8674		676.512	79.1127		676.512	79.224
678.375	76.7102		678.375	78.9509		678.375	79.0619
680.239	76.5312		680.239	78.7667		680.239	78.8775
682.103	73.8684		682.103	76.8713		682.103	76.7669
683.966	73.7012		683.966	76.6973		683.966	76.5931
685.83	73.8903		685.83	76.8941		685.83	76.7896
687.694	74.2164		687.694	77.2335		687.694	77.1286
689.558	74.3514		689.558	77.3739		689.558	77.2689
691.421	74.194		691.421	77.2101		691.421	77.1053
693.285	73.9969		693.285	77.005		693.285	76.9005
695.149	73.9576		695.149	76.9641		695.149	76.8596
697.012	73.8762		697.012	76.8794		697.012	76.7751
698.876	73.6357		698.876	76.6291		698.876	76.5251
700.74	73.3373		700.74	76.3186		700.74	76.215
702.603	73.1555		702.603	76.1294		702.603	76.026
704.467	73.0087		704.467	75.9767		704.467	75.8735
706.331	72.7873		706.331	75.7463		706.331	75.6434
708.194	72.6399		708.194	75.5928		708.194	75.4902
710.058	72.8144		710.058	75.7744		710.058	75.6715
711.922	73.4164		711.922	76.401		711.922	76.2972
713.785	74.1802		713.785	77.1958		713.785	77.0909
715.649	74.6604		715.649	77.6955		715.649	77.5901
717.513	74.8118		717.513	77.853		717.513	77.7473
719.376	74.8444		719.376	77.887		719.376	77.7812
721.24	74.8386		721.24	77.881		721.24	77.7752
723.104	74.9184		723.104	77.964		723.104	77.8581
724.967	75.0091		724.967	78.0584		724.967	77.9524
726.831	74.9556		726.831	78.0027		726.831	77.8968
728.695	74.8583		728.695	77.9015		728.695	77.7957
730.558	74.7441		730.558	77.7826		730.558	77.6769
732.422	74.4956		732.422	77.524		732.422	77.4187
734.286	73.9448		734.286	76.9509		734.286	76.8464
736.149	73.153		736.149	76.1268		736.149	76.0235
738.013	72.2221		738.013	75.1581		738.013	75.056
739.877	71.1068		739.877	73.9974		739.877	73.8969
741.74	70.2062		741.74	73.0603		741.74	72.9611
743.604	70.4558		743.604	73.32		743.604	73.2204
745.468	71.6482		745.468	74.5609		745.468	74.4596
747.331	72.589		747.331	75.5399		747.331	75.4373
749.195	73.1542		749.195	76.1281		749.195	76.0247
751.059	73.6778		751.059	76.673		751.059	76.5689
752.922	74.0756		752.922	77.087		752.922	76.9823
754.786	74.4412		754.786	77.4674		754.786	77.3622
756.65	74.8338		756.65	77.8759		756.65	77.7702
758.513	75.3062		758.513	78.3675		758.513	78.2611
760.377	75.865		760.377	78.9491		760.377	78.8419
762.241	76.3329		762.241	79.436		762.241	79.3282
764.104	76.728		764.104	79.8472		764.104	79.7388
765.968	77.127		765.968	80.2624		765.968	80.1534
767.832	77.4426		767.832	80.5908		767.832	80.4814
769.695	77.6591		769.695	80.8161		769.695	80.7064
771.559	77.8627		771.559	81.028		771.559	80.9179
773.423	78.0055		773.423	81.1766		773.423	81.0664
775.286	78.0477		775.286	81.2205		775.286	81.1102
777.15	78.0275		777.15	81.1995		777.15	81.0892
779.014	78.0463		779.014	81.2191		779.014	81.1088
780.877	78.0061		780.877	81.1772		780.877	81.0669
782.741	77.8889		782.741	81.0553		782.741	80.9452
784.605	77.8913		784.605	81.0577		784.605	80.9477
786.468	77.8565		786.468	81.0215		786.468	80.9115
788.332	77.7351		788.332	80.8952		788.332	80.7854
790.196	77.5038		790.196	80.6545		790.196	80.545
792.059	77.2596		792.059	80.4004		792.059	80.2912
793.923	77.3971		793.923	80.5434		793.923	80.4341
795.787	77.8157		795.787	80.9791		795.787	80.8692
797.65	78.0708		797.65	81.2446		797.65	81.1343
799.514	78.1035		799.514	81.2786		799.514	81.1683
801.378	78.0125		801.378	81.1838		801.378	81.0736
803.241	77.9329		803.241	81.101		803.241	80.9909
805.105	77.9262		805.105	81.0941		805.105	80.9839
806.969	77.9666		806.969	81.1361		806.969	81.026
808.832	78.0232		808.832	81.195		808.832	81.0847
810.696	78.0278		810.696	81.1998		810.696	81.0895
812.56	78.0173		812.56	81.1889		812.56	81.0787
814.423	78.0963		814.423	81.271		814.423	81.1607
816.287	78.2946		816.287	81.4775		816.287	81.3668
818.151	78.5151		818.151	81.7069		818.151	81.596
820.014	78.6266		820.014	81.8229		820.014	81.7118
821.878	78.7458		821.878	81.9469		821.878	81.8357
823.742	78.933		823.742	82.1418		823.742	82.0303
825.605	79.0399		825.605	82.253		825.605	82.1413
827.469	78.9507		827.469	82.1602		827.469	82.0486
829.333	78.8503		829.333	82.0557		829.333	81.9443
831.196	78.8493		831.196	82.0547		831.196	81.9433
833.06	78.8016		833.06	82.0051		833.06	81.8938
834.924	78.6975		834.924	81.8967		834.924	81.7855
836.787	78.7097		836.787	81.9094		836.787	81.7982
838.651	78.749		838.651	81.9503		838.651	81.8391
840.515	78.7539		840.515	81.9554		840.515	81.8441
842.378	78.7488		842.378	81.9501		842.378	81.8388
844.242	78.7052		844.242	81.9047		844.242	81.7935
846.106	78.6956		846.106	81.8948		846.106	81.7836
847.969	78.7191		847.969	81.9193		847.969	81.808
849.833	78.7761		849.833	81.9785		849.833	81.8672
851.697	78.7732		851.697	81.9755		851.697	81.8641
853.56	78.7703		853.56	81.9725		853.56	81.8612
855.424	78.8004		855.424	82.0038		855.424	81.8924
857.288	78.8586		857.288	82.0644		857.288	81.953
859.151	78.87		859.151	82.0762		859.151	81.9648
861.015	78.806		861.015	82.0096		861.015	81.8983
862.879	78.8194		862.879	82.0236		862.879	81.9123
864.742	78.845		864.742	82.0503		864.742	81.9389
866.606	78.8012		866.606	82.0046		866.606	81.8933
868.47	78.7459		868.47	81.9471		868.47	81.8358
870.333	78.6909		870.333	81.8899		870.333	81.7787
872.197	78.6567		872.197	81.8543		872.197	81.7431
874.061	78.6055		874.061	81.801		874.061	81.6899
875.924	78.4759		875.924	81.6661		875.924	81.5552
877.788	78.4007		877.788	81.5879		877.788	81.4771
879.652	78.4053		879.652	81.5927		879.652	81.4819
881.515	78.4447		881.515	81.6337		881.515	81.5228
883.379	78.4552		883.379	81.6445		883.379	81.5337
885.243	78.4297		885.243	81.6181		885.243	81.5072
887.106	78.4371		887.106	81.6257		887.106	81.5149
888.97	78.4047		888.97	81.5921		888.97	81.4813
890.834	78.2499		890.834	81.4309		890.834	81.3204
892.697	78.1312		892.697	81.3074		892.697	81.197
894.561	78.0837		894.561	81.258		894.561	81.1477
896.425	78.0127		896.425	81.1841		896.425	81.0738
898.288	77.9776		898.288	81.1476		898.288	81.0374
900.152	78.0286		900.152	81.2006		900.152	81.0903
902.016	78.0279		902.016	81.1999		902.016	81.0896
903.879	77.9896		903.879	81.16		903.879	81.0498
905.743	78.0183		905.743	81.19		905.743	81.0797
907.607	78.0091		907.607	81.1804		907.607	81.0701
909.47	77.9956		909.47	81.1663		909.47	81.0561
911.334	78.0081		911.334	81.1793		911.334	81.0691
913.198	78.0526		913.198	81.2256		913.198	81.1153
915.061	78.1806		915.061	81.3588		915.061	81.2483
916.925	78.2755		916.925	81.4575		916.925	81.3469
918.789	78.4054		918.789	81.5927		918.789	81.4819
920.652	78.5445		920.652	81.7375		920.652	81.6265
922.516	78.6894		922.516	81.8883		922.516	81.7771
924.38	78.7829		924.38	81.9856		924.38	81.8743
926.243	78.8478		926.243	82.0532		926.243	81.9417
928.107	78.8866		928.107	82.0935		928.107	81.982
929.971	78.8333		929.971	82.0381		929.971	81.9267
931.834	78.7971		931.834	82.0004		931.834	81.889
933.698	78.7959		933.698	81.9991		933.698	81.8878
935.562	78.7033		935.562	81.9028		935.562	81.7915
937.425	78.5521		937.425	81.7454		937.425	81.6344
939.289	78.3928		939.289	81.5797		939.289	81.4689
941.153	78.2495		941.153	81.4305		941.153	81.3199
943.016	78.1134		943.016	81.2889		943.016	81.1785
944.88	77.9637		944.88	81.1331		944.88	81.0229
946.744	77.7669		946.744	80.9283		946.744	80.8184
948.607	77.5516		948.607	80.7042		948.607	80.5947
950.471	77.3313		950.471	80.4749		950.471	80.3657
952.335	77.0629		952.335	80.1957		952.335	80.0868
954.198	76.7933		954.198	79.9151		954.198	79.8066
956.062	76.632		956.062	79.7473		956.062	79.639
957.926	76.6224		957.926	79.7373		957.926	79.629
959.789	76.5343		959.789	79.6456		959.789	79.5375
961.653	76.3696		961.653	79.4742		961.653	79.3663
963.517	76.2283		963.517	79.3271		963.517	79.2194
965.38	76.1139		965.38	79.2081		965.38	79.1005
967.244	75.9209		967.244	79.0072		967.244	78.9
969.108	75.7019		969.108	78.7793		969.108	78.6723
970.972	75.5623		970.972	78.634		970.972	78.5273
972.835	75.3543		972.835	78.4177		972.835	78.3112
974.699	75.1361		974.699	78.1905		974.699	78.0844
976.563	75.0221		976.563	78.0719		976.563	77.9659
978.426	74.806		978.426	77.847		978.426	77.7413
980.29	74.5331		980.29	77.5631		980.29	77.4577
982.154	74.2317		982.154	77.2494		982.154	77.1445
984.017	73.9469		984.017	76.953		984.017	76.8485
985.881	73.698		985.881	76.6939		985.881	76.5898
987.745	73.4139		987.745	76.3983		987.745	76.2946
989.608	73.1811		989.608	76.1561		989.608	76.0527
991.472	72.968		991.472	75.9343		991.472	75.8312
993.336	72.7439		993.336	75.7011		993.336	75.5983
995.199	72.4515		995.199	75.3968		995.199	75.2944
997.063	72.1113		997.063	75.0428		997.063	74.9409
998.927	71.851		998.927	74.7719		998.927	74.6703
1000.79	71.6628		1000.79	74.576		1000.79	74.4748
1002.65	71.457		1002.65	74.3619		1002.65	74.2609
1004.52	71.2003		1004.52	74.0948		1004.52	73.9941
1006.38	70.9698		1006.38	73.8549		1006.38	73.7546
1008.24	70.7375		1008.24	73.6131		1008.24	73.5131
1010.11	70.4791		1010.11	73.3442		1010.11	73.2446
1011.97	70.3041		1011.97	73.1622		1011.97	73.0628
1013.84	70.1535		1013.84	73.0054		1013.84	72.9063
1015.7	69.9862		1015.7	72.8313		1015.7	72.7324
1017.56	69.8465		1017.56	72.6859		1017.56	72.5872
1019.43	69.7023		1019.43	72.5358		1019.43	72.4373
1021.29	69.4996		1021.29	72.3249		1021.29	72.2267
1023.15	69.3021		1023.15	72.1194		1023.15	72.0215
1025.02	69.0723		1025.02	71.8802		1025.02	71.7826
1026.88	68.7442		1026.88	71.5388		1026.88	71.4417
1028.75	68.4854		1028.75	71.2694		1028.75	71.1727
1030.61	68.2881		1030.61	71.0641		1030.61	70.9676
1032.47	68.0943		1032.47	70.8625		1032.47	70.7662
1034.34	67.9747		1034.34	70.7381		1034.34	70.642
1036.2	67.8445		1036.2	70.6025		1036.2	70.5066
1038.06	67.5802		1038.06	70.3275		1038.06	70.232
1039.93	67.2665		1039.93	70.001		1039.93	69.906
1041.79	67.0238		1041.79	69.7485		1041.79	69.6538
1043.65	67.0198		1043.65	69.7443		1043.65	69.6496
1045.52	67.1491		1045.52	69.8788		1045.52	69.7839
1047.38	66.8324		1047.38	69.5492		1047.38	69.4548
1049.25	66.2846		1049.25	68.9792		1049.25	68.8855
1051.11	66.5115		1051.11	69.2153		1051.11	69.1213
1052.97	67.5826		1052.97	70.33		1052.97	70.2345
1054.84	68.5681		1054.84	71.3555		1054.84	71.2586
1056.7	69.0889		1056.7	71.8975		1056.7	71.7999
1058.56	69.2332		1058.56	72.0477		1058.56	71.9499
1060.43	69.1875		1060.43	72.0001		1060.43	71.9023
1062.29	69.1345		1062.29	71.945		1062.29	71.8473
1064.15	69.0782		1064.15	71.8863		1064.15	71.7887
1066.02	69.0334		1066.02	71.8397		1066.02	71.7422
1067.88	69.0502		1067.88	71.8572		1067.88	71.7596
1069.75	68.9927		1069.75	71.7974		1069.75	71.6999
1071.61	68.9389		1071.61	71.7414		1071.61	71.644
1073.47	68.975		1073.47	71.7789		1073.47	71.6815
1075.34	69.0446		1075.34	71.8514		1075.34	71.7539
1077.2	69.0968		1077.2	71.9057		1077.2	71.8081
1079.06	69.1895		1079.06	72.0022		1079.06	71.9045
1080.93	69.3888		1080.93	72.2097		1080.93	72.1116
1082.79	69.5378		1082.79	72.3647		1082.79	72.2664
1084.66	69.6949		1084.66	72.5282		1084.66	72.4297
1086.52	69.9231		1086.52	72.7656		1086.52	72.6668
1088.38	70.1235		1088.38	72.9742		1088.38	72.8751
1090.25	70.2987		1090.25	73.1565		1090.25	73.0571
1092.11	70.5048		1092.11	73.371		1092.11	73.2713
1093.97	70.7614		1093.97	73.638		1093.97	73.538
1095.84	70.9537		1095.84	73.8382		1095.84	73.7379
1097.7	71.1363		1097.7	74.0281		1097.7	73.9276
1099.56	71.336		1099.56	74.236		1099.56	74.1352
1101.43	71.571		1101.43	74.4805		1101.43	74.3794
1103.29	71.7639		1103.29	74.6812		1103.29	74.5798
1105.16	71.9385		1105.16	74.8629		1105.16	74.7613
1107.02	72.1633		1107.02	75.0969		1107.02	74.9949
1108.88	72.3727		1108.88	75.3148		1108.88	75.2125
1110.75	72.5675		1110.75	75.5175		1110.75	75.415
1112.61	72.7673		1112.61	75.7254		1112.61	75.6226
1114.47	72.9725		1114.47	75.9389		1114.47	75.8358
1116.34	73.1573		1116.34	76.1313		1116.34	76.0279
1118.2	73.2996		1118.2	76.2794		1118.2	76.1759
1120.07	73.4378		1120.07	76.4232		1120.07	76.3194
1121.93	73.6077		1121.93	76.6		1121.93	76.496
1123.79	73.8389		1123.79	76.8406		1123.79	76.7363
1125.66	74.1085		1125.66	77.1211		1125.66	77.0164
1127.52	74.4479		1127.52	77.4744		1127.52	77.3692
1129.38	74.8067		1129.38	77.8478		1129.38	77.7421
1131.25	75.0862		1131.25	78.1387		1131.25	78.0326
1133.11	75.3012		1133.11	78.3624		1133.11	78.2559
1134.97	75.5517		1134.97	78.623		1134.97	78.5163
1136.84	75.7519		1136.84	78.8314		1136.84	78.7244
1138.7	75.9511		1138.7	79.0387		1138.7	78.9313
1140.57	76.151		1140.57	79.2467		1140.57	79.1391
1142.43	76.3434		1142.43	79.4469		1142.43	79.339
1144.29	76.5822		1144.29	79.6955		1144.29	79.5873
1146.16	76.8143		1146.16	79.937		1146.16	79.8284
1148.02	77.0614		1148.02	80.1941		1148.02	80.0852
1149.88	77.3898		1149.88	80.5358		1149.88	80.4265
1151.75	77.6638		1151.75	80.821		1151.75	80.7113
1153.61	77.877		1153.61	81.0429		1153.61	80.9329
1155.47	78.0962		1155.47	81.271		1155.47	81.1606
1157.34	78.2572		1157.34	81.4385		1157.34	81.3279
1159.2	78.3973		1159.2	81.5844		1159.2	81.4736
1161.07	78.555		1161.07	81.7484		1161.07	81.6374
1162.93	78.6873		1162.93	81.8861		1162.93	81.775
1164.79	78.824		1164.79	82.0284		1164.79	81.917
1166.66	79.0187		1166.66	82.2309		1166.66	82.1193
1168.52	79.1867		1168.52	82.4058		1168.52	82.2939
1170.38	79.3979		1170.38	82.6256		1170.38	82.5134
1172.25	79.672		1172.25	82.9108		1172.25	82.7982
1174.11	79.9092		1174.11	83.1577		1174.11	83.0447
1175.98	80.19		1175.98	83.4499		1175.98	83.3366
1177.84	80.4786		1177.84	83.7503		1177.84	83.6365
1179.7	80.6404		1179.7	83.9186		1179.7	83.8047
1181.57	80.7314		1181.57	84.0133		1181.57	83.8992
1183.43	80.8414		1183.43	84.1278		1183.43	84.0136
1185.29	80.8654		1185.29	84.1528		1185.29	84.0385
1187.16	80.8367		1187.16	84.1229		1187.16	84.0087
1189.02	80.8273		1189.02	84.1131		1189.02	83.9989
1190.88	80.8443		1190.88	84.1308		1190.88	84.0165
1192.75	80.7595		1192.75	84.0425		1192.75	83.9284
1194.61	80.6684		1194.61	83.9477		1194.61	83.8337
1196.48	80.6214		1196.48	83.8989		1196.48	83.7849
1198.34	80.5289		1198.34	83.8026		1198.34	83.6888
1200.2	80.4219		1200.2	83.6912		1200.2	83.5776
1202.07	80.3103		1202.07	83.5751		1202.07	83.4616
1203.93	80.147		1203.93	83.4052		1203.93	83.2919
1205.79	80.0407		1205.79	83.2945		1205.79	83.1814
1207.66	79.9507		1207.66	83.2009		1207.66	83.0879
1209.52	79.8124		1209.52	83.057		1209.52	82.9442
1211.38	79.675		1211.38	82.914		1211.38	82.8014
1213.25	79.5811		1213.25	82.8163		1213.25	82.7038
1215.11	79.438		1215.11	82.6673		1215.11	82.5551
1216.98	79.2895		1216.98	82.5128		1216.98	82.4007
1218.84	79.1462		1218.84	82.3637		1218.84	82.2519
1220.7	79.0351		1220.7	82.248		1220.7	82.1363
1222.57	78.9387		1222.57	82.1478		1222.57	82.0362
1224.43	78.7985		1224.43	82.0018		1224.43	81.8904
1226.29	78.6886		1226.29	81.8875		1226.29	81.7763
1228.16	78.6224		1228.16	81.8186		1228.16	81.7075
1230.02	78.5682		1230.02	81.7621		1230.02	81.6511
1231.89	78.4927		1231.89	81.6836		1231.89	81.5727
1233.75	78.4095		1233.75	81.597		1233.75	81.4862
1235.61	78.3217		1235.61	81.5057		1235.61	81.395
1237.48	78.2635		1237.48	81.4451		1237.48	81.3345
1239.34	78.2333		1239.34	81.4136		1239.34	81.3031
1241.2	78.1765		1241.2	81.3545		1241.2	81.244
1243.07	78.103		1243.07	81.2781		1243.07	81.1677
1244.93	78.063		1244.93	81.2364		1244.93	81.1261
1246.79	78.042		1246.79	81.2146		1246.79	81.1043
1248.66	78.044		1248.66	81.2167		1248.66	81.1064
1250.52	78.0876		1250.52	81.262		1250.52	81.1517
1252.39	78.1478		1252.39	81.3247		1252.39	81.2143
1254.25	78.1657		1254.25	81.3433		1254.25	81.2328
1256.11	78.1859		1256.11	81.3643		1256.11	81.2538
1257.98	78.213		1257.98	81.3925		1257.98	81.282
1259.84	78.1822		1259.84	81.3605		1259.84	81.25
1261.7	78.1365		1261.7	81.313		1261.7	81.2025
1263.57	78.1865		1263.57	81.3649		1263.57	81.2544
1265.43	78.3536		1265.43	81.5389		1265.43	81.4282
1267.29	78.7279		1267.29	81.9284		1267.29	81.8171
1269.16	79.2015		1269.16	82.4212		1269.16	82.3093
1271.02	79.5301		1271.02	82.7632		1271.02	82.6508
1272.89	79.7469		1272.89	82.9888		1272.89	82.8761
1274.75	79.8086		1274.75	83.053		1274.75	82.9402
1276.61	79.7917		1276.61	83.0354		1276.61	82.9226
1278.48	79.7464		1278.48	82.9883		1278.48	82.8756
1280.34	79.6617		1280.34	82.9001		1280.34	82.7876
1282.2	79.542		1282.2	82.7755		1282.2	82.6631
1284.07	79.5017		1284.07	82.7336		1284.07	82.6213
1285.93	79.6168		1285.93	82.8534		1285.93	82.7409
1287.8	79.7149		1287.8	82.9555		1287.8	82.8428
1289.66	79.7941		1289.66	83.0379		1289.66	82.9252
1291.52	79.7957		1291.52	83.0396		1291.52	82.9268
1293.39	79.7843		1293.39	83.0277		1293.39	82.9149
1295.25	79.7643		1295.25	83.0069		1295.25	82.8942
1297.11	79.6936		1297.11	82.9333		1297.11	82.8207
1298.98	79.6015		1298.98	82.8374		1298.98	82.725
1300.84	79.5562		1300.84	82.7904		1300.84	82.678
1302.7	79.5926		1302.7	82.8282		1302.7	82.7157
1304.57	79.6394		1304.57	82.8769		1304.57	82.7644
1306.43	79.6092		1306.43	82.8455		1306.43	82.733
1308.3	79.5338		1308.3	82.767		1308.3	82.6546
1310.16	79.5684		1310.16	82.803		1310.16	82.6906
1312.02	79.7148		1312.02	82.9554		1312.02	82.8427
1313.89	79.9086		1313.89	83.157		1313.89	83.0441
1315.75	80.1324		1315.75	83.39		1315.75	83.2768
1317.61	80.4006		1317.61	83.6691		1317.61	83.5555
1319.48	80.8143		1319.48	84.0996		1319.48	83.9854
1321.34	81.2847		1321.34	84.5891		1321.34	84.4743
1323.2	81.7225		1323.2	85.0447		1323.2	84.9292
1325.07	82.0143		1325.07	85.3483		1325.07	85.2324
1326.93	82.1495		1326.93	85.4891		1326.93	85.373
1328.8	82.2239		1328.8	85.5664		1328.8	85.4503
1330.66	82.2626		1330.66	85.6068		1330.66	85.4905
1332.52	82.3022		1332.52	85.6479		1332.52	85.5316
1334.39	82.3239		1334.39	85.6706		1334.39	85.5542
1336.25	82.2407		1336.25	85.584		1336.25	85.4678
1338.11	82.1559		1338.11	85.4957		1338.11	85.3796
1339.98	82.0637		1339.98	85.3998		1339.98	85.2838
1341.84	81.9675		1341.84	85.2996		1341.84	85.1838
1343.71	81.8318		1343.71	85.1584		1343.71	85.0428
1345.57	81.7163		1345.57	85.0382		1345.57	84.9227
1347.43	81.64		1347.43	84.9589		1347.43	84.8435
1349.3	81.5203		1349.3	84.8343		1349.3	84.7191
1351.16	81.3721		1351.16	84.68		1351.16	84.565
1353.02	81.2247		1353.02	84.5266		1353.02	84.4119
1354.89	81.0196		1354.89	84.3133		1354.89	84.1988
1356.75	80.8624		1356.75	84.1496		1356.75	84.0353
1358.61	80.7083		1358.61	83.9892		1358.61	83.8752
1360.48	80.4675		1360.48	83.7387		1360.48	83.6249
1362.34	80.0479		1362.34	83.302		1362.34	83.1889
1364.21	79.657		1364.21	82.8953		1364.21	82.7827
1366.07	79.3671		1366.07	82.5936		1366.07	82.4814
1367.93	79.0338		1367.93	82.2467		1367.93	82.135
1369.8	78.7052		1369.8	81.9047		1369.8	81.7935
1371.66	78.3693		1371.66	81.5552		1371.66	81.4444
1373.52	77.9051		1373.52	81.0721		1373.52	80.962
1375.39	77.4805		1375.39	80.6303		1375.39	80.5208
1377.25	77.2179		1377.25	80.357		1377.25	80.2478
1379.12	76.9745		1379.12	80.1037		1379.12	79.995
1380.98	76.7909		1380.98	79.9126		1380.98	79.8041
1382.84	76.6715		1382.84	79.7884		1382.84	79.68
1384.71	76.5989		1384.71	79.7128		1384.71	79.6046
1386.57	76.3756		1386.57	79.4805		1386.57	79.3725
1388.43	76.1363		1388.43	79.2314		1388.43	79.1238
1390.3	76.0591		1390.3	79.1511		1390.3	79.0436
1392.16	76.0264		1392.16	79.117		1392.16	79.0096
1394.02	75.919		1394.02	79.0053		1394.02	78.898
1395.89	75.8341		1395.89	78.917		1395.89	78.8098
1397.75	75.8936		1397.75	78.9789		1397.75	78.8716
1399.62	75.9593		1399.62	79.0472		1399.62	78.9398
1401.48	76.1906		1401.48	79.2879		1401.48	79.1802
1403.34	76.4466		1403.34	79.5543		1403.34	79.4463
1405.21	76.6714		1405.21	79.7883		1405.21	79.68
1407.07	76.9589		1407.07	80.0875		1407.07	79.9788
1408.93	77.3775		1408.93	80.5231		1408.93	80.4138
1410.8	77.8935		1410.8	81.0601		1410.8	80.95
1412.66	78.3809		1412.66	81.5673		1412.66	81.4565
1414.52	78.837		1414.52	82.0419		1414.52	81.9305
1416.39	79.1748		1416.39	82.3934		1416.39	82.2815
1418.25	79.2377		1418.25	82.4589		1418.25	82.3469
1420.12	79.316		1420.12	82.5404		1420.12	82.4283
1421.98	79.5026		1421.98	82.7345		1421.98	82.6222
1423.84	79.4813		1423.84	82.7124		1423.84	82.6001
1425.71	79.434		1425.71	82.6632		1425.71	82.5509
1427.57	79.1766		1427.57	82.3953		1427.57	82.2834
1429.43	78.6629		1429.43	81.8607		1429.43	81.7496
1431.3	78.1246		1431.3	81.3006		1431.3	81.1902
1433.16	77.7968		1433.16	80.9594		1433.16	80.8495
1435.03	77.6168		1435.03	80.7721		1435.03	80.6624
1436.89	77.8327		1436.89	80.9968		1436.89	80.8868
1438.75	78.6017		1438.75	81.797		1438.75	81.6859
1440.62	79.1107		1440.62	82.3267		1440.62	82.2149
1442.48	79.3245		1442.48	82.5492		1442.48	82.4372
1444.34	79.4568		1444.34	82.6869		1444.34	82.5746
1446.21	79.6181		1446.21	82.8547		1446.21	82.7422
1448.07	79.6899		1448.07	82.9295		1448.07	82.8169
1449.93	79.7753		1449.93	83.0183		1449.93	82.9056
1451.8	79.937		1451.8	83.1866		1451.8	83.0737
1453.66	80.0864		1453.66	83.3421		1453.66	83.2289
1455.53	80.0275		1455.53	83.2808		1455.53	83.1677
1457.39	79.5777		1457.39	82.8127		1457.39	82.7003
1459.25	79.6807		1459.25	82.9199		1459.25	82.8073
1461.12	79.9177		1461.12	83.1666		1461.12	83.0536
1462.98	79.8857		1462.98	83.1332		1462.98	83.0204
1464.84	79.6409		1464.84	82.8784		1464.84	82.7659
1466.71	79.652		1466.71	82.89		1466.71	82.7774
1468.57	79.7737		1468.57	83.0167		1468.57	82.904
1470.43	79.7922		1470.43	83.0359		1470.43	82.9232
1472.3	79.7132		1472.3	82.9537		1472.3	82.841
1474.16	79.8851		1474.16	83.1326		1474.16	83.0197
1476.03	80.2539		1476.03	83.5164		1476.03	83.403
1477.89	80.7125		1477.89	83.9937		1477.89	83.8796
1479.75	81.1698		1479.75	84.4696		1479.75	84.3549
1481.62	81.5562		1481.62	84.8716		1481.62	84.7564
1483.48	81.9092		1483.48	85.239		1483.48	85.1232
1485.34	82.092		1485.34	85.4292		1485.34	85.3132
1487.21	81.9966		1487.21	85.3299		1487.21	85.2141
1489.07	81.6649		1489.07	84.9847		1489.07	84.8693
1490.94	81.4642		1490.94	84.7759		1490.94	84.6608
1492.8	81.5823		1492.8	84.8988		1492.8	84.7835
1494.66	81.514		1494.66	84.8277		1494.66	84.7125
1496.53	81.1009		1496.53	84.3978		1496.53	84.2832
1498.39	80.7623		1498.39	84.0455		1498.39	83.9313
1500.25	80.6352		1500.25	83.9132		1500.25	83.7993
1502.12	80.6186		1502.12	83.8959		1502.12	83.782
1503.98	80.4924		1503.98	83.7646		1503.98	83.6509
1505.84	79.7669		1505.84	83.0096		1505.84	82.8969
1507.71	78.6364		1507.71	81.8332		1507.71	81.722
1509.57	78.489		1509.57	81.6798		1509.57	81.5689
1511.44	78.3404		1511.44	81.5251		1511.44	81.4144
1513.3	78.0554		1513.3	81.2285		1513.3	81.1183
1515.16	77.7889		1515.16	80.9512		1515.16	80.8413
1517.03	77.5582		1517.03	80.7111		1517.03	80.6015
1518.89	77.5241		1518.89	80.6756		1518.89	80.5661
1520.75	77.1588		1520.75	80.2954		1520.75	80.1864
1522.62	76.6747		1522.62	79.7917		1522.62	79.6834
1524.48	76.5719		1524.48	79.6847		1524.48	79.5765
1526.34	76.2902		1526.34	79.3916		1526.34	79.2838
1528.21	76.1171		1528.21	79.2114		1528.21	79.1039
1530.07	76.0121		1530.07	79.1022		1530.07	78.9948
1531.94	75.6988		1531.94	78.7761		1531.94	78.6692
1533.8	75.1479		1533.8	78.2028		1533.8	78.0966
1535.66	75.1593		1535.66	78.2147		1535.66	78.1085
1537.53	75.1346		1537.53	78.189		1537.53	78.0829
1539.39	74.3179		1539.39	77.339		1539.39	77.234
1541.25	73.6075		1541.25	76.5998		1541.25	76.4958
1543.12	73.4915		1543.12	76.479		1543.12	76.3752
1544.98	73.3242		1544.98	76.305		1544.98	76.2013
1546.85	73.2706		1546.85	76.2493		1546.85	76.1457
1548.71	73.1979		1548.71	76.1736		1548.71	76.0701
1550.57	73.1798		1550.57	76.1547		1550.57	76.0513
1552.44	73.3197		1552.44	76.3003		1552.44	76.1967
1554.3	73.4111		1554.3	76.3955		1554.3	76.2917
1556.16	73.6479		1556.16	76.6418		1556.16	76.5377
1558.03	73.5111		1558.03	76.4995		1558.03	76.3956
1559.89	73.5348		1559.89	76.5241		1559.89	76.4202
1561.75	74.3288		1561.75	77.3504		1561.75	77.2454
1563.62	74.7262		1563.62	77.764		1563.62	77.6584
1565.48	74.8913		1565.48	77.9358		1565.48	77.83
1567.35	74.9132		1567.35	77.9586		1567.35	77.8527
1569.21	74.6031		1569.21	77.6359		1569.21	77.5305
1571.07	74.4731		1571.07	77.5006		1571.07	77.3953
1572.94	74.5824		1572.94	77.6143		1572.94	77.5089
1574.8	74.293		1574.8	77.3131		1574.8	77.2081
1576.66	73.837		1576.66	76.8386		1576.66	76.7343
1578.53	73.9609		1578.53	76.9675		1578.53	76.863
1580.39	74.1104		1580.39	77.1232		1580.39	77.0184
1582.25	74.1192		1582.25	77.1324		1582.25	77.0276
1584.12	74.1827		1584.12	77.1984		1584.12	77.0936
1585.98	74.2515		1585.98	77.27		1585.98	77.1651
1587.85	74.306		1587.85	77.3267		1587.85	77.2217
1589.71	74.4203		1589.71	77.4457		1589.71	77.3405
1591.57	74.5601		1591.57	77.5911		1591.57	77.4857
1593.44	74.8237		1593.44	77.8654		1593.44	77.7597
1595.3	75.2536		1595.3	78.3128		1595.3	78.2065
1597.16	75.5328		1597.16	78.6034		1597.16	78.4967
1599.03	75.6968		1599.03	78.774		1599.03	78.6671
1600.89	75.8603		1600.89	78.9442		1600.89	78.837
1602.76	75.9601		1602.76	79.0481		1602.76	78.9407
1604.62	75.9775		1604.62	79.0662		1604.62	78.9588
1606.48	75.8518		1606.48	78.9353		1606.48	78.8281
1608.35	75.6384		1608.35	78.7133		1608.35	78.6064
1610.21	75.4688		1610.21	78.5367		1610.21	78.4301
1612.07	75.3328		1612.07	78.3952		1612.07	78.2888
1613.94	75.1216		1613.94	78.1755		1613.94	78.0694
1615.8	74.5656		1615.8	77.5969		1615.8	77.4915
1617.66	74.0106		1617.66	77.0193		1617.66	76.9147
1619.53	74.0506		1619.53	77.061		1619.53	76.9563
1621.39	73.8359		1621.39	76.8374		1621.39	76.7331
1623.26	73.372		1623.26	76.3548		1623.26	76.2511
1625.12	73.1941		1625.12	76.1696		1625.12	76.0662
1626.98	73.1332		1626.98	76.1062		1626.98	76.0029
1628.85	73.0494		1628.85	76.019		1628.85	75.9158
1630.71	73.2511		1630.71	76.2289		1630.71	76.1254
1632.57	73.4593		1632.57	76.4456		1632.57	76.3418
1634.44	73.3668		1634.44	76.3493		1634.44	76.2456
1636.3	73.0929		1636.3	76.0643		1636.3	75.961
1638.16	73.2489		1638.16	76.2267		1638.16	76.1232
1640.03	73.4348		1640.03	76.4201		1640.03	76.3164
1641.89	73.5508		1641.89	76.5408		1641.89	76.4369
1643.76	73.6155		1643.76	76.6082		1643.76	76.5042
1645.62	73.454		1645.62	76.44		1645.62	76.3362
1647.48	73.3776		1647.48	76.3606		1647.48	76.2569
1649.35	73.7741		1649.35	76.7732		1649.35	76.6689
1651.21	73.7433		1651.21	76.7411		1651.21	76.6369
1653.07	73.1093		1653.07	76.0813		1653.07	75.978
1654.94	73.5575		1654.94	76.5478		1654.94	76.4438
1656.8	74.1593		1656.8	77.174		1656.8	77.0692
1658.67	74.4555		1658.67	77.4822		1658.67	77.377
1660.53	74.7271		1660.53	77.7649		1660.53	77.6593
1662.39	74.9139		1662.39	77.9593		1662.39	77.8534
1664.26	75.382		1664.26	78.4464		1664.26	78.3399
1666.12	75.918		1666.12	79.0042		1666.12	78.8969
1667.98	76.1957		1667.98	79.2932		1667.98	79.1855
1669.85	76.3934		1669.85	79.4989		1669.85	79.391
1671.71	76.7902		1671.71	79.9119		1671.71	79.8034
1673.57	77.1593		1673.57	80.296		1673.57	80.187
1675.44	77.3582		1675.44	80.5029		1675.44	80.3936
1677.3	77.6692		1677.3	80.8266		1677.3	80.7169
1679.17	78.0494		1679.17	81.2223		1679.17	81.112
1681.03	78.3295		1681.03	81.5138		1681.03	81.4031
1682.89	78.4301		1682.89	81.6185		1682.89	81.5077
1684.76	78.5889		1684.76	81.7837		1684.76	81.6726
1686.62	79.2278		1686.62	82.4486		1686.62	82.3366
1688.48	79.6327		1688.48	82.87		1688.48	82.7574
1690.35	80.0561		1690.35	83.3105		1690.35	83.1974
1692.21	80.4662		1692.21	83.7373		1692.21	83.6236
1694.08	80.8036		1694.08	84.0884		1694.08	83.9743
1695.94	81.3275		1695.94	84.6336		1695.94	84.5187
1697.8	81.8203		1697.8	85.1464		1697.8	85.0308
1699.67	81.9756		1699.67	85.3081		1699.67	85.1922
1701.53	82.4422		1701.53	85.7937		1701.53	85.6772
1703.39	82.7798		1703.39	86.145		1703.39	86.028
1705.26	83.0866		1705.26	86.4643		1705.26	86.3469
1707.12	83.4586		1707.12	86.8514		1707.12	86.7334
1708.98	83.65		1708.98	87.0505		1708.98	86.9323
1710.85	83.8081		1710.85	87.2151		1710.85	87.0967
1712.71	84.0086		1712.71	87.4238		1712.71	87.3051
1714.58	84.1508		1714.58	87.5717		1714.58	87.4528
1716.44	84.3104		1716.44	87.7378		1716.44	87.6187
1718.3	84.5669		1718.3	88.0047		1718.3	87.8852
1720.17	84.8131		1720.17	88.261		1720.17	88.1411
1722.03	84.9262		1722.03	88.3787		1722.03	88.2586
1723.89	85.1411		1723.89	88.6023		1723.89	88.482
1725.76	85.365		1725.76	88.8352		1725.76	88.7146
1727.62	85.5283		1727.62	89.0052		1727.62	88.8844
1729.48	85.6956		1729.48	89.1794		1729.48	89.0583
1731.35	85.8319		1731.35	89.3211		1731.35	89.1998
1733.21	85.9895		1733.21	89.4851		1733.21	89.3636
1735.08	86.2334		1735.08	89.739		1735.08	89.6172
1736.94	86.4435		1736.94	89.9576		1736.94	89.8354
1738.8	86.5861		1738.8	90.106		1738.8	89.9836
1740.67	86.7636		1740.67	90.2908		1740.67	90.1682
1742.53	86.9989		1742.53	90.5356		1742.53	90.4126
1744.39	87.1101		1744.39	90.6513		1744.39	90.5282
1746.26	87.2094		1746.26	90.7546		1746.26	90.6314
1748.12	87.3385		1748.12	90.889		1748.12	90.7656
1749.99	87.5174		1749.99	91.0752		1749.99	90.9515
1751.85	87.6211		1751.85	91.1831		1751.85	91.0592
1753.71	87.6665		1753.71	91.2303		1753.71	91.1064
1755.58	87.7071		1755.58	91.2726		1755.58	91.1487
1757.44	87.7874		1757.44	91.3562		1757.44	91.2321
1759.3	87.9052		1759.3	91.4787		1759.3	91.3545
1761.17	88.0095		1761.17	91.5873		1761.17	91.4629
1763.03	88.0031		1763.03	91.6132		1763.03	91.4807
1764.89	88.0154		1764.89	91.6436		1764.89	91.5067
1766.76	88.1089		1766.76	91.7199		1766.76	91.5881
1768.62	88.1095		1768.62	91.7224		1768.62	91.5902
1770.49	88.0156		1770.49	91.6446		1770.49	91.5075
1772.35	88.1885		1772.35	91.7735		1772.35	91.6489
1774.21	88.2608		1774.21	91.8488		1774.21	91.724
1776.08	88.2898		1776.08	91.879		1776.08	91.7543
1777.94	88.2547		1777.94	91.8425		1777.94	91.7178
1779.8	88.1815		1779.8	91.7663		1779.8	91.6416
1781.67	88.1738		1781.67	91.7582		1781.67	91.6336
1783.53	88.2415		1783.53	91.8287		1783.53	91.704
1785.39	88.2564		1785.39	91.8442		1785.39	91.7195
1787.26	88.2918		1787.26	91.8811		1787.26	91.7563
1789.12	88.2977		1789.12	91.8872		1789.12	91.7625
1790.99	88.3101		1790.99	91.9001		1790.99	91.7754
1792.85	88.3802		1792.85	91.9731		1792.85	91.8482
1794.71	88.3936		1794.71	91.987		1794.71	91.8621
1796.58	88.3917		1796.58	91.985		1796.58	91.8601
1798.44	88.3283		1798.44	91.919		1798.44	91.7942
1800.3	88.2413		1800.3	91.8286		1800.3	91.7039
1802.17	88.2411		1802.17	91.8283		1802.17	91.7036
1804.03	88.2868		1804.03	91.8758		1804.03	91.7511
1805.9	88.3517		1805.9	91.9434		1805.9	91.8186
1807.76	88.3222		1807.76	91.9126		1807.76	91.7878
1809.62	88.2768		1809.62	91.8655		1809.62	91.7408
1811.49	88.2979		1811.49	91.8874		1811.49	91.7627
1813.35	88.2366		1813.35	91.8236		1813.35	91.6989
1815.21	88.166		1815.21	91.7501		1815.21	91.6255
1817.08	88.2976		1817.08	91.8871		1817.08	91.7623
1818.94	88.3116		1818.94	91.9017		1818.94	91.7769
1820.8	88.2138		1820.8	91.7999		1820.8	91.6752
1822.67	88.2162		1822.67	91.8024		1822.67	91.6777
1824.53	88.1583		1824.53	91.7421		1824.53	91.6176
1826.4	88.181		1826.4	91.7657		1826.4	91.6411
1828.26	88.3066		1828.26	91.8964		1828.26	91.7716
1830.12	88.2753		1830.12	91.8639		1830.12	91.7392
1831.99	88.1982		1831.99	91.7837		1831.99	91.659
1833.85	88.2141		1833.85	91.8002		1833.85	91.6755
1835.71	88.2719		1835.71	91.8604		1835.71	91.7356
1837.58	88.2897		1837.58	91.8789		1837.58	91.7541
1839.44	88.2205		1839.44	91.8069		1839.44	91.6822
1841.3	88.2327		1841.3	91.8196		1841.3	91.6949
1843.17	88.4335		1843.17	92.0286		1843.17	91.9036
1845.03	88.463		1845.03	92.0592		1845.03	91.9342
1846.9	88.3291		1846.9	91.9199		1846.9	91.795
1848.76	88.2859		1848.76	91.8749		1848.76	91.7501
1850.62	88.3581		1850.62	91.9501		1850.62	91.8252
1852.49	88.4562		1852.49	92.0522		1852.49	91.9272
1854.35	88.2957		1854.35	91.8851		1854.35	91.7603
1856.21	88.0754		1856.21	91.6558		1856.21	91.5314
1858.08	88.1258		1858.08	91.7083		1858.08	91.5838
1859.94	88.2297		1859.94	91.8164		1859.94	91.6917
1861.81	88.3034		1861.81	91.8931		1861.81	91.7684
1863.67	88.3242		1863.67	91.9147		1863.67	91.7899
1865.53	88.2194		1865.53	91.8057		1865.53	91.6811
1867.4	88.1564		1867.4	91.7401		1867.4	91.6156
1869.26	88.2656		1869.26	91.8538		1869.26	91.7291
1871.12	88.469		1871.12	92.0655		1871.12	91.9405
1872.99	88.5237		1872.99	92.1224		1872.99	91.9973
1874.85	88.3329		1874.85	91.9238		1874.85	91.799
1876.71	88.3141		1876.71	91.9042		1876.71	91.7794
1878.58	88.4749		1878.58	92.0716		1878.58	91.9466
1880.44	88.4624		1880.44	92.0586		1880.44	91.9336
1882.31	88.349		1882.31	91.9405		1882.31	91.8157
1884.17	88.374		1884.17	91.9665		1884.17	91.8417
1886.03	88.4119		1886.03	92.0061		1886.03	91.8811
1887.9	88.3278		1887.9	91.9185		1887.9	91.7937
1889.76	88.3011		1889.76	91.8907		1889.76	91.766
1891.62	88.2252		1891.62	91.8117		1891.62	91.6871
1893.49	88.1437		1893.49	91.727		1893.49	91.6024
1895.35	88.3585		1895.35	91.9504		1895.35	91.8256
1897.21	88.6459		1897.21	92.2496		1897.21	92.1243
1899.08	88.5814		1899.08	92.1825		1899.08	92.0573
1900.94	88.4353		1900.94	92.0304		1900.94	91.9054
1902.81	88.5483		1902.81	92.148		1902.81	92.0229
1904.67	88.5172		1904.67	92.1156		1904.67	91.9906
1906.53	88.4941		1906.53	92.0916		1906.53	91.9666
1908.4	88.4612		1908.4	92.0574		1908.4	91.9324
1910.26	88.1425		1910.26	91.7257		1910.26	91.6011
1912.12	88.1866		1912.12	91.7716		1912.12	91.6469
1913.99	88.4435		1913.99	92.0389		1913.99	91.9139
1915.85	88.577		1915.85	92.1778		1915.85	92.0527
1917.72	88.4602		1917.72	92.0563		1917.72	91.9313
1919.58	88.2492		1919.58	91.8368		1919.58	91.7121
1921.44	88.3698		1921.44	91.9622		1921.44	91.8373
1923.31	88.4344		1923.31	92.0294		1923.31	91.9044
1925.17	88.5665		1925.17	92.167		1925.17	92.0418
1927.03	88.787		1927.03	92.3964		1927.03	92.2709
1928.9	88.5682		1928.9	92.1687		1928.9	92.0435
1930.76	88.3935		1930.76	91.9869		1930.76	91.862
1932.62	88.548		1932.62	92.1477		1932.62	92.0226
1934.49	88.4415		1934.49	92.0369		1934.49	91.9119
1936.35	88.306		1936.35	91.8958		1936.35	91.771
1938.22	88.3301		1938.22	91.9209		1938.22	91.7961
1940.08	88.3597		1940.08	91.9517		1940.08	91.8268
1941.94	88.5781		1941.94	92.179		1941.94	92.0539
1943.81	88.875		1943.81	92.4879		1943.81	92.3624
1945.67	88.875		1945.67	92.5415		1945.67	92.4026
1947.53	88.9738		1947.53	92.5908		1947.53	92.465
1949.4	88.9842		1949.4	92.6016		1949.4	92.4758
1951.26	89.1372		1951.26	92.7609		1951.26	92.6349
1953.13	89.2485		1953.13	92.8767		1953.13	92.7506
1954.99	89.5206		1954.99	93.1599		1954.99	93.0334
1956.85	89.2685		1956.85	92.8975		1956.85	92.7713
1958.72	88.7321		1958.72	92.3392		1958.72	92.2138
1960.58	89.0239		1960.58	92.6429		1960.58	92.5171
1962.44	89.2068		1962.44	92.8332		1962.44	92.7072
1964.31	88.7101		1964.31	92.3164		1964.31	92.191
1966.17	88.4089		1966.17	92.0029		1966.17	91.878
1968.03	88.4232		1968.03	92.0178		1968.03	91.8928
1969.9	88.5211		1969.9	92.1197		1969.9	91.9946
1971.76	89.0781		1971.76	92.6993		1971.76	92.5734
1973.63	89.5286		1973.63	93.1681		1973.63	93.0416
1975.49	89.6003		1975.49	93.2428		1975.49	93.1162
1977.35	89.9634		1977.35	93.6206		1977.35	93.4935
1979.22	89.8594		1979.22	93.5124		1979.22	93.3854
1981.08	89.8841		1981.08	93.5381		1981.08	93.4111
1982.94	90.0495		1982.94	93.7102		1982.94	93.583
1984.81	89.8016		1984.81	93.4522		1984.81	93.3253
1986.67	89.3156		1986.67	92.9465		1986.67	92.8203
1988.53	89.0943		1988.53	92.7162		1988.53	92.5903
1990.4	89.2612		1990.4	92.8899		1990.4	92.7638
1992.26	89.3386		1992.26	92.9704		1992.26	92.8441
1994.13	89.3413		1994.13	92.9732		1994.13	92.8469
1995.99	89.0623		1995.99	92.6829		1995.99	92.5571
1997.85	88.3353		1997.85	91.9263		1997.85	91.8015
1999.72	88.2502		1999.72	91.8377		1999.72	91.713
2001.58	89.1655		2001.58	92.7903		2001.58	92.6643
2003.44	89.9951		2003.44	93.6536		2003.44	93.5264
2005.31	89.7446		2005.31	93.3929		2005.31	93.2661
2007.17	89.4481		2007.17	93.0844		2007.17	92.958
2009.04	90.2145		2009.04	93.8819		2009.04	93.7544
2010.9	90.1284		2010.9	93.7923		2010.9	93.665
2012.76	89.2317		2012.76	92.8592		2012.76	92.7331
2014.63	89.1852		2014.63	92.8108		2014.63	92.6847
2016.49	89.4283		2016.49	93.0637		2016.49	92.9374
2018.35	89.2974		2018.35	92.9275		2018.35	92.8014
2020.22	89.634		2020.22	93.2778		2020.22	93.1512
2022.08	89.9476		2022.08	93.6042		2022.08	93.4771
2023.94	89.9804		2023.94	93.6383		2023.94	93.5111
2025.81	90.1313		2025.81	93.7953		2025.81	93.668
2027.67	89.8481		2027.67	93.5006		2027.67	93.3737
2029.54	89.5577		2029.54	93.1984		2029.54	93.0719
2031.4	89.4939		2031.4	93.1321		2031.4	93.0056
2033.26	89.7037		2033.26	93.3504		2033.26	93.2236
2035.13	90.1733		2035.13	93.8391		2035.13	93.7116
2036.99	89.9883		2036.99	93.6465		2036.99	93.5194
2038.85	89.4177		2038.85	93.0528		2038.85	92.9264
2040.72	89.1211		2040.72	92.7441		2040.72	92.6182
2042.58	88.9768		2042.58	92.5939		2042.58	92.4681
2044.44	89.0131		2044.44	92.6316		2044.44	92.5058
2046.31	89.4219		2046.31	93.0571		2046.31	92.9307
2048.17	89.6265		2048.17	93.27		2048.17	93.1434
2050.04	89.2867		2050.04	92.9164		2050.04	92.7902
2051.9	89.1389		2051.9	92.7626		2051.9	92.6367
2053.76	89.0915		2053.76	92.7133		2053.76	92.5874
2055.63	88.8187		2055.63	92.4293		2055.63	92.3038
2057.49	88.6027		2057.49	92.2046		2057.49	92.0794
2059.35	88.5847		2059.35	92.1859		2059.35	92.0607
2061.22	88.7276		2061.22	92.3346		2061.22	92.2092
2063.08	88.8177		2063.08	92.4284		2063.08	92.3029
2064.95	88.706		2064.95	92.3121		2064.95	92.1868
2066.81	88.599		2066.81	92.2007		2066.81	92.0755
2068.67	88.8597		2068.67	92.4721		2068.67	92.3465
2070.54	88.6569		2070.54	92.261		2070.54	92.1358
2072.4	88.3052		2072.4	91.895		2072.4	91.7703
2074.26	88.6322		2074.26	92.2353		2074.26	92.11
2076.13	88.6954		2076.13	92.3011		2076.13	92.1757
2077.99	88.4179		2077.99	92.0123		2077.99	91.8874
2079.85	88.3917		2079.85	91.985		2079.85	91.8601
2081.72	88.5235		2081.72	92.1222		2081.72	91.9971
2083.58	88.6446		2083.58	92.2482		2083.58	92.123
2085.45	88.6261		2085.45	92.229		2085.45	92.1037
2087.31	88.7035		2087.31	92.3094		2087.31	92.1841
2089.17	88.7231		2089.17	92.3299		2089.17	92.2045
2091.04	88.3684		2091.04	91.9608		2091.04	91.8359
2092.9	88.1316		2092.9	91.7143		2092.9	91.5898
2094.76	88.3556		2094.76	91.9474		2094.76	91.8226
2096.63	88.3919		2096.63	91.9853		2096.63	91.8604
2098.49	88.3881		2098.49	91.9813		2098.49	91.8564
2100.35	88.5768		2100.35	92.1776		2100.35	92.0524
2102.22	88.6208		2102.22	92.2234		2102.22	92.0982
2104.08	88.6192		2104.08	92.2218		2104.08	92.0966
2105.95	88.8367		2105.95	92.4482		2105.95	92.3226
2107.81	88.7871		2107.81	92.3965		2107.81	92.271
2109.67	88.2475		2109.67	91.835		2109.67	91.7103
2111.54	88.1392		2111.54	91.7223		2111.54	91.5977
2113.4	88.4545		2113.4	92.0504		2113.4	91.9254
2115.26	88.5041		2115.26	92.102		2115.26	91.977
2117.13	88.4752		2117.13	92.0719		2117.13	91.9469
2118.99	88.5134		2118.99	92.1117		2118.99	91.9866
2120.86	88.4062		2120.86	92.0001		2120.86	91.8751
2122.72	88.5535		2122.72	92.1534		2122.72	92.0283
2124.58	88.6504		2124.58	92.2542		2124.58	92.129
2126.45	88.5638		2126.45	92.1641		2126.45	92.039
2128.31	88.8309		2128.31	92.4421		2128.31	92.3166
2130.17	88.8663		2130.17	92.4789		2130.17	92.3533
2132.04	88.9678		2132.04	92.5846		2132.04	92.4589
2133.9	89.115		2133.9	92.7378		2133.9	92.6118
2135.76	88.776		2135.76	92.3849		2135.76	92.2595
2137.63	88.2306		2137.63	91.8174		2137.63	91.6927
2139.49	88.3597		2139.49	91.9518		2139.49	91.8269
2141.36	89.0126		2141.36	92.6311		2141.36	92.5053
2143.22	88.8214		2143.22	92.4322		2143.22	92.3067
2145.08	88.6708		2145.08	92.2755		2145.08	92.1502
2146.95	89.0383		2146.95	92.6579		2146.95	92.5321
2148.81	89.2237		2148.81	92.8508		2148.81	92.7247
2150.67	89.0478		2150.67	92.6678		2150.67	92.542
2152.54	88.7603		2152.54	92.3686		2152.54	92.2432
2154.4	88.6086		2154.4	92.2107		2154.4	92.0855
2156.26	88.6825		2156.26	92.2877		2156.26	92.1624
2158.13	89.6999		2158.13	93.3464		2158.13	93.2197
2159.99	90.4213		2159.99	94.0972		2159.99	93.9694
2161.86	90.0081		2161.86	93.6671		2161.86	93.54
2163.72	90.0981		2163.72	93.7608		2163.72	93.6335
2165.58	90.315		2165.58	93.9865		2165.58	93.8589
2167.45	89.8619		2167.45	93.5149		2167.45	93.388
2169.31	89.4415		2169.31	93.0775		2169.31	92.9511
2171.17	89.193		2171.17	92.8189		2171.17	92.6929
2173.04	89.0007		2173.04	92.6188		2173.04	92.4931
2174.9	88.9501		2174.9	92.5661		2174.9	92.4404
2176.77	89.0972		2176.77	92.7192		2176.77	92.5933
2178.63	90.0964		2178.63	93.7591		2178.63	93.6317
2180.49	90.3708		2180.49	94.0446		2180.49	93.9169
2182.36	89.4816		2182.36	93.1192		2182.36	92.9928
2184.22	89.2177		2184.22	92.8446		2184.22	92.7186
2186.08	89.2638		2186.08	92.8926		2186.08	92.7664
2187.95	89.2896		2187.95	92.9195		2187.95	92.7933
2189.81	89.7573		2189.81	93.4061		2189.81	93.2793
2191.67	89.026		2191.67	92.6451		2191.67	92.5193
2193.54	88.0695		2193.54	91.6497		2193.54	91.5252
2195.4	88.8326		2195.4	92.4438		2195.4	92.3183
2197.27	89.1666		2197.27	92.7914		2197.27	92.6655
2199.13	88.6506		2199.13	92.2544		2199.13	92.1291
2200.99	88.3805		2200.99	91.9733		2200.99	91.8485
2202.86	88.3824		2202.86	91.9753		2202.86	91.8504
2204.72	88.4053		2204.72	91.9991		2204.72	91.8742
2206.58	88.6486		2206.58	92.2523		2206.58	92.1271
2208.45	88.6783		2208.45	92.2832		2208.45	92.1579
2210.31	88.5814		2210.31	92.1824		2210.31	92.0572
2212.18	88.4714		2212.18	92.0679		2212.18	91.9429
2214.04	88.4197		2214.04	92.0141		2214.04	91.8892
2215.9	88.7086		2215.9	92.3147		2215.9	92.1894
2217.77	88.8477		2217.77	92.4595		2217.77	92.334
2219.63	88.5292		2219.63	92.1281		2219.63	92.003
2221.49	88.7907		2221.49	92.4003		2221.49	92.2748
2223.36	89.1467		2223.36	92.7707		2223.36	92.6447
2225.22	88.7817		2225.22	92.3908		2225.22	92.2654
2227.08	88.4973		2227.08	92.0949		2227.08	91.9698
2228.95	88.5732		2228.95	92.1739		2228.95	92.0488
2230.81	88.4937		2230.81	92.0912		2230.81	91.9661
2232.68	88.4043		2232.68	91.9981		2232.68	91.8732
2234.54	88.1421		2234.54	91.7253		2234.54	91.6007
2236.4	88.1749		2236.4	91.7594		2236.4	91.6348
2238.27	88.7009		2238.27	92.3067		2238.27	92.1814
2240.13	88.8505		2240.13	92.4625		2240.13	92.3369
2241.99	88.4185		2241.99	92.0129		2241.99	91.888
2243.86	88.003		2243.86	91.5805		2243.86	91.4562
2245.72	88.2043		2245.72	91.79		2245.72	91.6654
2247.58	88.6105		2247.58	92.2127		2247.58	92.0875
2249.45	88.2401		2249.45	91.8273		2249.45	91.7026
2251.31	87.9091		2251.31	91.4828		2251.31	91.3586
2253.18	87.894		2253.18	91.4671		2253.18	91.3429
2255.04	87.9526		2255.04	91.5281		2255.04	91.4038
2256.9	88.0272		2256.9	91.6057		2256.9	91.4813
2258.77	87.9879		2258.77	91.5648		2258.77	91.4405
2260.63	88.0048		2260.63	91.5824		2260.63	91.458
2262.49	88.0135		2262.49	91.5914		2262.49	91.467
2264.36	87.9791		2264.36	91.5556		2264.36	91.4313
2266.22	87.7913		2266.22	91.3602		2266.22	91.2362
2268.09	87.6425		2268.09	91.2054		2268.09	91.0816
2269.95	87.8819		2269.95	91.4545		2269.95	91.3303
2271.81	88.0773		2271.81	91.6579		2271.81	91.5334
2273.68	88.1247		2273.68	91.7071		2273.68	91.5826
2275.54	88.1675		2275.54	91.7517		2275.54	91.6271
2277.4	88.0109		2277.4	91.5887		2277.4	91.4644
2279.27	87.5452		2279.27	91.1041		2279.27	90.9804
2281.13	87.5943		2281.13	91.1552		2281.13	91.0314
2282.99	87.7328		2282.99	91.2993		2282.99	91.1754
2284.86	87.4285		2284.86	90.9826		2284.86	90.8591
2286.72	87.3154		2286.72	90.8649		2286.72	90.7416
2288.59	87.4521		2288.59	91.0072		2288.59	90.8837
2290.45	87.4382		2290.45	90.9927		2290.45	90.8692
2292.31	87.3832		2292.31	90.9355		2292.31	90.812
2294.18	87.4132		2294.18	90.9667		2294.18	90.8432
2296.04	87.4799		2296.04	91.0362		2296.04	90.9125
2297.9	87.3832		2297.9	90.9356		2297.9	90.8121
2299.77	87.2863		2299.77	90.8347		2299.77	90.7113
2301.63	87.1872		2301.63	90.7315		2301.63	90.6083
2303.49	87.2993		2303.49	90.8482		2303.49	90.7248
2305.36	87.4834		2305.36	91.0398		2305.36	90.9162
2307.22	87.4908		2307.22	91.0475		2307.22	90.9238
2309.09	87.4369		2309.09	90.9914		2309.09	90.8679
2310.95	87.35		2310.95	90.901		2310.95	90.7776
2312.81	87.1657		2312.81	90.7091		2312.81	90.586
2314.68	87.1554		2314.68	90.6984		2314.68	90.5753
2316.54	87.2272		2316.54	90.7732		2316.54	90.6499
2318.4	87.3561		2318.4	90.9073		2318.4	90.7839
2320.27	87.4106		2320.27	90.9641		2320.27	90.8406
2322.13	87.3177		2322.13	90.8673		2322.13	90.7439
2324	87.2977		2324	90.8465		2324	90.7232
2325.86	87.378		2325.86	90.9301		2325.86	90.8067
2327.72	87.3328		2327.72	90.8831		2327.72	90.7597
2329.59	87.2307		2329.59	90.7768		2329.59	90.6535
2331.45	87.2521		2331.45	90.7991		2331.45	90.6758
2333.31	87.2846		2333.31	90.8329		2333.31	90.7096
2335.18	87.2531		2335.18	90.8001		2335.18	90.6768
2337.04	87.2886		2337.04	90.8371		2337.04	90.7138
2338.9	87.3325		2338.9	90.8828		2338.9	90.7594
2340.77	87.14		2340.77	90.6824		2340.77	90.5593
2342.63	86.9145		2342.63	90.4478		2342.63	90.3249
2344.5	86.9969		2344.5	90.5335		2344.5	90.4106
2346.36	87.1105		2346.36	90.6518		2346.36	90.5287
2348.22	87.1926		2348.22	90.7371		2348.22	90.6139
2350.09	87.4449		2350.09	90.9997		2350.09	90.8761
2351.95	87.5875		2351.95	91.1481		2351.95	91.0244
2353.81	87.4095		2353.81	90.9629		2353.81	90.8394
2355.68	87.211		2355.68	90.7564		2355.68	90.6331
2357.54	87.2139		2357.54	90.7593		2357.54	90.6361
2359.4	87.3058		2359.4	90.8549		2359.4	90.7316
2361.27	87.271		2361.27	90.8188		2361.27	90.6954
2363.13	87.3599		2363.13	90.9113		2363.13	90.7879
2365	87.4895		2365	91.0461		2365	90.9225
2366.86	87.3273		2366.86	90.8774		2366.86	90.754
2368.72	87.087		2368.72	90.6273		2368.72	90.5043
2370.59	86.9671		2370.59	90.5025		2370.59	90.3796
2372.45	87.0269		2372.45	90.5647		2372.45	90.4417
2374.31	87.1164		2374.31	90.6579		2374.31	90.5348
2376.18	87.0103		2376.18	90.5475		2376.18	90.4245
2378.04	86.8557		2378.04	90.3866		2378.04	90.2639
2379.91	86.7971		2379.91	90.3256		2379.91	90.203
2381.77	86.8431		2381.77	90.3735		2381.77	90.2508
2383.63	86.8673		2383.63	90.3987		2383.63	90.2759
2385.5	86.9311		2385.5	90.4651		2385.5	90.3422
2387.36	86.9995		2387.36	90.5362		2387.36	90.4133
2389.22	86.974		2389.22	90.5097		2389.22	90.3868
2391.09	87.091		2391.09	90.6315		2391.09	90.5084
2392.95	87.0587		2392.95	90.5978		2392.95	90.4748
2394.81	86.9531		2394.81	90.4879		2394.81	90.3651
2396.68	87.0285		2396.68	90.5664		2396.68	90.4434
2398.54	87.0964		2398.54	90.6371		2398.54	90.514
2400.41	86.9378		2400.41	89.7476		2400.41	89.2625
2402.27	86.818		2402.27	89.6239		2402.27	89.1395
2404.13	86.8182		2404.13	89.624		2404.13	89.1396
2406	86.966		2406	89.7766		2406	89.2914
2407.86	86.9984		2407.86	89.8101		2407.86	89.3247
2409.72	86.8957		2409.72	89.704		2409.72	89.2192
2411.59	86.8591		2411.59	89.6663		2411.59	89.1817
2413.45	86.7884		2413.45	89.5933		2413.45	89.109
2415.31	86.7666		2415.31	89.5708		2415.31	89.0866
2417.18	86.8076		2417.18	89.6131		2417.18	89.1288
2419.04	86.9295		2419.04	89.739		2419.04	89.2539
2420.91	86.8979		2420.91	89.7064		2420.91	89.2215
2422.77	86.8799		2422.77	89.6877		2422.77	89.203
2424.63	86.9629		2424.63	89.7734		2424.63	89.2882
2426.5	86.9307		2426.5	89.7402		2426.5	89.2552
2428.36	86.7676		2428.36	89.5719		2428.36	89.0877
2430.22	86.7186		2430.22	89.5213		2430.22	89.0374
2432.09	86.7687		2432.09	89.573		2432.09	89.0888
2433.95	86.7161		2433.95	89.5186		2433.95	89.0348
2435.82	86.6084		2435.82	89.4075		2435.82	88.9242
2437.68	86.6884		2437.68	89.49		2437.68	89.0063
2439.54	86.6408		2439.54	89.4409		2439.54	88.9575
2441.41	86.8712		2441.41	89.6788		2441.41	89.1941
2443.27	87.0664		2443.27	89.8803		2443.27	89.3945
2445.13	86.8482		2445.13	89.655		2445.13	89.1705
2447	86.6999		2447	89.5019		2447	89.0181
2448.86	86.7279		2448.86	89.5308		2448.86	89.0469
2450.72	86.7956		2450.72	89.6008		2450.72	89.1165
2452.59	86.65		2452.59	89.4505		2452.59	88.967
2454.45	86.5844		2454.45	89.3827		2454.45	88.8996
2456.32	86.8083		2456.32	89.6139		2456.32	89.1295
2458.18	86.7478		2458.18	89.5514		2458.18	89.0673
2460.04	86.5269		2460.04	89.3233		2460.04	88.8405
2461.91	86.5026		2461.91	89.2983		2461.91	88.8156
2463.77	86.6693		2463.77	89.4703		2463.77	88.9867
2465.63	86.7479		2465.63	89.5515		2465.63	89.0675
2467.5	86.6315		2467.5	89.4313		2467.5	88.9479
2469.36	86.6068		2469.36	89.4058		2469.36	88.9226
2471.22	86.5488		2471.22	89.3459		2471.22	88.863
2473.09	86.5469		2473.09	89.344		2473.09	88.8611
2474.95	86.5971		2474.95	89.3958		2474.95	88.9126
2476.82	86.6555		2476.82	89.4561		2476.82	88.9726
2478.68	86.7456		2478.68	89.5491		2478.68	89.0651
2480.54	86.8147		2480.54	89.6204		2480.54	89.136
2482.41	86.5927		2482.41	89.3913		2482.41	88.9081
2484.27	86.4356		2484.27	89.2291		2484.27	88.7469
2486.13	86.425		2486.13	89.2181		2486.13	88.7359
2488	86.4977		2488	89.2932		2488	88.8106
2489.86	86.6216		2489.86	89.4211		2489.86	88.9378
2491.73	86.6647		2491.73	89.4656		2491.73	88.982
2493.59	86.5856		2493.59	89.384		2493.59	88.9009
2495.45	86.4174		2495.45	89.2103		2495.45	88.7281
2497.32	86.4158		2497.32	89.2086		2497.32	88.7264
2499.18	86.4394		2499.18	89.233		2499.18	88.7507
2501.04	86.4042		2501.04	89.1967		2501.04	88.7146
2502.91	86.5121		2502.91	89.3081		2502.91	88.8254
2504.77	86.6892		2504.77	89.4909		2504.77	89.0072
2506.63	86.6548		2506.63	89.4554		2506.63	88.9719
2508.5	86.659		2508.5	89.4597		2508.5	88.9762
2510.36	86.6		2510.36	89.3988		2510.36	88.9156
2512.23	86.4326		2512.23	89.226		2512.23	88.7437
2514.09	86.4952		2514.09	89.2906		2514.09	88.808
2515.95	86.4623		2515.95	89.2567		2515.95	88.7743
2517.82	86.3976		2517.82	89.1898		2517.82	88.7077
2519.68	86.5749		2519.68	89.3729		2519.68	88.8898
2521.54	86.5533		2521.54	89.3506		2521.54	88.8677
2523.41	86.374		2523.41	89.1655		2523.41	88.6835
2525.27	86.4782		2525.27	89.2731		2525.27	88.7905
2527.14	86.6486		2527.14	89.449		2527.14	88.9656
2529	86.6496		2529	89.45		2529	88.9665
2530.86	86.5968		2530.86	89.3956		2530.86	88.9124
2532.73	86.513		2532.73	89.309		2532.73	88.8263
2534.59	86.3912		2534.59	89.1833		2534.59	88.7012
2536.45	86.2557		2536.45	89.0434		2536.45	88.5621
2538.32	86.1329		2538.32	88.9166		2538.32	88.436
2540.18	86.335		2540.18	88.2619		2540.18	87.3485
2542.04	86.439		2542.04	88.3682		2542.04	87.4537
2543.91	86.4354		2543.91	88.3645		2543.91	87.45
2545.77	86.4472		2545.77	88.3766		2545.77	87.462
2547.64	86.5306		2547.64	88.4619		2547.64	87.5464
2549.5	86.4924		2549.5	88.4228		2549.5	87.5078
2551.36	86.3408		2551.36	88.2679		2551.36	87.3544
2553.23	86.308		2553.23	88.2343		2553.23	87.3212
2555.09	86.2433		2555.09	88.1681		2555.09	87.2557
2556.95	86.2847		2556.95	88.2105		2556.95	87.2976
2558.82	86.4146		2558.82	88.3432		2558.82	87.429
2560.68	86.4736		2560.68	88.4036		2560.68	87.4887
2562.54	86.4092		2562.54	88.3378		2562.54	87.4236
2564.41	86.3456		2564.41	88.2728		2564.41	87.3592
2566.27	86.2551		2566.27	88.1803		2566.27	87.2677
2568.14	86.3177		2568.14	88.2442		2568.14	87.331
2570	86.3933		2570	88.3215		2570	87.4074
2571.86	86.3717		2571.86	88.2994		2571.86	87.3856
2573.73	86.4095		2573.73	88.3381		2573.73	87.4239
2575.59	86.2488		2575.59	88.1738		2575.59	87.2613
2577.45	86.2642		2577.45	88.1896		2577.45	87.2769
2579.32	86.2625		2579.32	88.1878		2579.32	87.2751
2581.18	86.0967		2581.18	87.1573		2581.18	85.8159
2583.05	85.9906		2583.05	87.05		2583.05	85.7102
2584.91	86.0217		2584.91	87.0814		2584.91	85.7412
2586.77	86.09		2586.77	87.1505		2586.77	85.8092
2588.64	86.0992		2588.64	87.1599		2588.64	85.8185
2590.5	86.0876		2590.5	87.1481		2590.5	85.8069
2592.36	86.1846		2592.36	87.2463		2592.36	85.9036
2594.23	86.2605		2594.23	87.3231		2594.23	85.9792
2596.09	86.1041		2596.09	87.1648		2596.09	85.8233
2597.95	85.9625		2597.95	87.0215		2597.95	85.6822
2599.82	85.8089		2599.82	86.8659		2599.82	85.5291
2601.68	85.8449		2601.68	86.9024		2601.68	85.565
2603.55	85.9371		2603.55	86.9958		2603.55	85.6569
2605.41	85.9073		2605.41	86.9656		2605.41	85.6272
2607.27	85.9469		2607.27	87.0056		2607.27	85.6666
2609.14	85.9021		2609.14	86.9603		2609.14	85.622
2611	85.6994		2611	86.7551		2611	85.42
2612.86	85.7248		2612.86	86.7808		2612.86	85.4452
2614.73	85.8299		2614.73	86.8872		2614.73	85.55
2616.59	85.7741		2616.59	86.8308		2616.59	85.4945
2618.45	85.8131		2618.45	86.8703		2618.45	85.5333
2620.32	85.8943		2620.32	86.9524		2620.32	85.6142
2622.18	85.9678		2622.18	87.0268		2622.18	85.6874
2624.05	85.9031		2624.05	86.9614		2624.05	85.623
2625.91	85.7428		2625.91	86.799		2625.91	85.4632
2627.77	85.6355		2627.77	86.6904		2627.77	85.3562
2629.64	85.666		2629.64	86.7213		2629.64	85.3867
2631.5	85.7362		2631.5	86.7924		2631.5	85.4566
2633.36	85.767		2633.36	86.8236		2633.36	85.4874
2635.23	85.6964		2635.23	86.7521		2635.23	85.417
2637.09	85.5481		2637.09	86.602		2637.09	85.2691
2638.96	85.5828		2638.96	86.637		2638.96	85.3037
2640.82	85.6278		2640.82	86.6827		2640.82	85.3486
2642.68	85.6526		2642.68	86.7077		2642.68	85.3733
2644.55	85.6849		2644.55	86.7404		2644.55	85.4055
2646.41	85.5626		2646.41	86.6167		2646.41	85.2836
2648.27	85.4296		2648.27	86.482		2648.27	85.1511
2650.14	85.4		2650.14	86.452		2650.14	85.1215
2652	85.4155		2652	86.4678		2652	85.137
2653.86	85.5786		2653.86	86.6328		2653.86	85.2995
2655.73	85.6331		2655.73	86.6881		2655.73	85.3539
2657.59	85.5738		2657.59	86.628		2657.59	85.2947
2659.46	85.5001		2659.46	86.5533		2659.46	85.2213
2661.32	85.4867		2661.32	86.5398		2661.32	85.2079
2663.18	85.5424		2663.18	86.5962		2663.18	85.2635
2665.05	85.5106		2665.05	86.564		2665.05	85.2318
2666.91	85.4201		2666.91	86.4724		2666.91	85.1416
2668.77	85.3809		2668.77	86.4327		2668.77	85.1025
2670.64	85.4679		2670.64	86.5208		2670.64	85.1892
2672.5	85.5331		2672.5	86.5868		2672.5	85.2542
2674.36	85.4045		2674.36	86.4566		2674.36	85.126
2676.23	85.3425		2676.23	86.3938		2676.23	85.0642
2678.09	85.3113		2678.09	86.3622		2678.09	85.0331
2679.96	85.2974		2679.96	86.3481		2679.96	85.0192
2681.82	85.2996		2681.82	86.3504		2681.82	85.0215
2683.68	85.2238		2683.68	86.2737		2683.68	84.9459
2685.55	85.2123		2685.55	86.262		2685.55	84.9344
2687.41	85.1457		2687.41	86.1946		2687.41	84.8681
2689.27	85.1031		2689.27	86.1515		2689.27	84.8256
2691.14	85.2655		2691.14	86.3159		2691.14	84.9875
2693	85.2664		2693	86.3168		2693	84.9884
2694.87	85.2173		2694.87	86.2671		2694.87	84.9395
2696.73	85.2187		2696.73	86.2685		2696.73	84.9408
2698.59	85.2134		2698.59	86.2631		2698.59	84.9355
2700.46	85.2221		2700.46	86.272		2700.46	84.9442
2702.32	85.2346		2702.32	86.2846		2702.32	84.9567
2704.18	85.1665		2704.18	86.2156		2704.18	84.8888
2706.05	85.0569		2706.05	86.1047		2706.05	84.7795
2707.91	85.0891		2707.91	86.1373		2707.91	84.8116
2709.77	85.101		2709.77	86.1494		2709.77	84.8235
2711.64	85.0273		2711.64	86.0748		2711.64	84.7501
2713.5	84.9772		2713.5	86.024		2713.5	84.7001
2715.37	84.9763		2715.37	86.0231		2715.37	84.6992
2717.23	84.9103		2717.23	85.9563		2717.23	84.6334
2719.09	84.8479		2719.09	85.8932		2719.09	84.5713
2720.96	84.815		2720.96	85.8598		2720.96	84.5384
2722.82	84.8395		2722.82	85.8847		2722.82	84.5629
2724.68	84.8452		2724.68	85.8904		2724.68	84.5685
2726.55	84.7706		2726.55	85.8149		2726.55	84.4942
2728.41	84.7083		2728.41	85.7518		2728.41	84.432
2730.27	84.693		2730.27	85.7363		2730.27	84.4168
2732.14	84.7407		2732.14	85.7846		2732.14	84.4644
2734	84.7197		2734	85.7634		2734	84.4435
2735.87	84.6343		2735.87	85.6769		2735.87	84.3584
2737.73	84.5737		2737.73	85.6155		2737.73	84.2979
2739.59	84.5885		2739.59	85.6305		2739.59	84.3126
2741.46	84.6679		2741.46	85.7109		2741.46	84.3918
2743.32	84.643		2743.32	85.6857		2743.32	84.367
2745.18	84.535		2745.18	85.5763		2745.18	84.2593
2747.05	84.4529		2747.05	85.4933		2747.05	84.1775
2748.91	84.3956		2748.91	85.4353		2748.91	84.1204
2750.78	84.3881		2750.78	85.4276		2750.78	84.1129
2752.64	84.3249		2752.64	85.3637		2752.64	84.0499
2754.5	84.2447		2754.5	85.2825		2754.5	83.97
2756.37	84.2873		2756.37	85.3256		2756.37	84.0124
2758.23	84.3392		2758.23	85.3782		2758.23	84.0642
2760.09	84.2921		2760.09	85.3305		2760.09	84.0173
2761.96	84.0825		2761.96	85.1183		2761.96	83.8084
2763.82	84.0514		2763.82	85.0869		2763.82	83.7774
2765.68	84.1723		2765.68	85.2092		2765.68	83.8978
2767.55	84.1494		2767.55	84.625		2767.55	83.0335
2769.41	84.0211		2769.41	84.496		2769.41	82.9069
2771.28	84.108		2771.28	84.5834		2771.28	82.9926
2773.14	84.0769		2773.14	84.5522		2773.14	82.962
2775	84.0019		2775	84.4767		2775	82.8879
2776.87	84.0182		2776.87	84.4931		2776.87	82.9041
2778.73	84.0245		2778.73	84.4994		2778.73	82.9103
2780.59	83.9296		2780.59	84.404		2780.59	82.8166
2782.46	83.7868		2782.46	84.2604		2782.46	82.6758
2784.32	83.7485		2784.32	84.2218		2784.32	82.6379
2786.19	83.8517		2786.19	84.3257		2786.19	82.7398
2788.05	83.9123		2788.05	84.3866		2788.05	82.7995
2789.91	83.888		2789.91	84.3622		2789.91	82.7756
2791.78	83.7899		2791.78	84.2635		2791.78	82.6787
2793.64	83.6166		2793.64	84.0892		2793.64	82.5078
2795.5	83.5944		2795.5	84.0669		2795.5	82.4859
2797.37	83.5493		2797.37	84.0216		2797.37	82.4414
2799.23	83.4284		2799.23	83.8999		2799.23	82.322
2801.09	83.4369		2801.09	83.9084		2801.09	82.3304
2802.96	83.4307		2802.96	83.9023		2802.96	82.3243
2804.82	83.2785		2804.82	83.7493		2804.82	82.1742
2806.69	83.2254		2806.69	83.6958		2806.69	82.1218
2808.55	83.2552		2808.55	83.7258		2808.55	82.1512
2810.41	83.2094		2810.41	83.6797		2810.41	82.106
2812.28	83.2417		2812.28	83.7121		2812.28	82.1378
2814.14	83.2509		2814.14	83.7215		2814.14	82.147
2816	83.1421		2816	83.6121		2816	82.0396
2817.87	83.1125		2817.87	83.5823		2817.87	82.0104
2819.73	83.022		2819.73	83.4913		2819.73	81.9211
2821.59	82.9901		2821.59	83.4592		2821.59	81.8896
2823.46	83.0674		2823.46	83.5369		2823.46	81.9659
2825.32	82.9225		2825.32	83.3912		2825.32	81.8229
2827.19	82.8535		2827.19	83.3218		2827.19	81.7548
2829.05	82.9185		2829.05	83.3872		2829.05	81.819
2830.91	82.8361		2830.91	83.3043		2830.91	81.7377
2832.78	82.7855		2832.78	83.2534		2832.78	81.6876
2834.64	82.6485		2834.64	83.1156		2834.64	81.5525
2836.5	82.5333		2836.5	82.9998		2836.5	81.4388
2838.37	82.4699		2838.37	82.936		2838.37	81.3763
2840.23	82.2733		2840.23	82.7383		2840.23	81.1823
2842.1	82.0893		2842.1	82.5533		2842.1	81.0007
2843.96	81.909		2843.96	82.372		2843.96	80.8228
2845.82	81.7697		2845.82	82.2319		2845.82	80.6854
2847.69	81.7007		2847.69	82.1625		2847.69	80.6173
2849.55	81.5444		2849.55	82.0053		2849.55	80.463
2851.41	81.3219		2851.41	81.7815		2851.41	80.2435
2853.28	81.1205		2853.28	81.579		2853.28	80.0448
2855.14	81.0225		2855.14	81.4805		2855.14	79.9481
2857	81.1092		2857	81.5677		2857	80.0336
2858.87	81.1615		2858.87	81.6202		2858.87	80.0852
2860.73	81.086		2860.73	81.5443		2860.73	80.0108
2862.6	81.0962		2862.6	81.5546		2862.6	80.0208
2864.46	81.1067		2864.46	81.5651		2864.46	80.0311
2866.32	81.0288		2866.32	81.4868		2866.32	79.9543
2868.19	80.8908		2868.19	81.348		2868.19	79.8181
2870.05	80.9703		2870.05	81.428		2870.05	79.8966
2871.91	81.0192		2871.91	81.4771		2871.91	79.9448
2873.78	80.9584		2873.78	81.416		2873.78	79.8849
2875.64	80.9274		2875.64	81.3848		2875.64	79.8542
2877.5	80.9236		2877.5	81.381		2877.5	79.8505
2879.37	81.0733		2879.37	81.5316		2879.37	79.9982
2881.23	81.2203		2881.23	81.6794		2881.23	80.1432
2883.1	81.2164		2883.1	81.6755		2883.1	80.1394
2884.96	81.2573		2884.96	81.7166		2884.96	80.1798
2886.82	81.2217		2886.82	81.6808		2886.82	80.1446
2888.69	81.0547		2888.69	81.5128		2888.69	79.9798
2890.55	81.0141		2890.55	81.472		2890.55	79.9397
2892.41	80.8934		2892.41	81.3506		2892.41	79.8207
2894.28	80.7372		2894.28	81.1935		2894.28	79.6666
2896.14	80.664		2896.14	81.1199		2896.14	79.5943
2898.01	80.6223		2898.01	81.078		2898.01	79.5532
2899.87	80.5543		2899.87	81.0096		2899.87	79.4861
2901.73	80.5184		2901.73	80.9735		2901.73	79.4506
2903.6	80.3849		2903.6	80.8392		2903.6	79.3189
2905.46	80.2361		2905.46	80.6896		2905.46	79.1721
2907.32	80.0382		2907.32	80.4905		2907.32	78.9768
2909.19	79.8873		2909.19	80.3388		2909.19	78.8279
2911.05	79.7587		2911.05	80.2095		2911.05	78.701
2912.91	79.6501		2912.91	80.1003		2912.91	78.5939
2914.78	79.4447		2914.78	79.8938		2914.78	78.3912
2916.64	79.1271		2916.64	79.5743		2916.64	78.0778
2918.51	79.0218		2918.51	79.4685		2918.51	77.9739
2920.37	79.062		2920.37	79.5089		2920.37	78.0136
2922.23	78.9271		2922.23	79.3732		2922.23	77.8804
2924.1	78.8232		2924.1	79.2687		2924.1	77.7779
2925.96	78.7729		2925.96	79.2182		2925.96	77.7283
2927.82	78.7314		2927.82	79.1764		2927.82	77.6874
2929.69	78.7377		2929.69	79.1828		2929.69	77.6936
2931.55	78.8394		2931.55	79.2851		2931.55	77.794
2933.41	79.0146		2933.41	79.4612		2933.41	77.9668
2935.28	79.2634		2935.28	79.7114		2935.28	78.2123
2937.14	79.5184		2937.14	79.9679		2937.14	78.4639
2939.01	79.6103		2939.01	80.0603		2939.01	78.5546
2940.87	79.6839		2940.87	80.1343		2940.87	78.6272
2942.73	79.7592		2942.73	80.21		2942.73	78.7015
2944.6	79.7458		2944.6	80.1965		2944.6	78.6883
2946.46	79.665		2946.46	80.1152		2946.46	78.6085
2948.32	79.6478		2948.32	80.0979		2948.32	78.5916
2950.19	79.5313		2950.19	79.9809		2950.19	78.4767
2952.05	79.36		2952.05	79.8086		2952.05	78.3077
2953.92	79.3314		2953.92	79.7798		2953.92	78.2794
2955.78	79.5006		2955.78	79.95		2955.78	78.4464
2957.64	79.4219		2957.64	79.8708		2957.64	78.3687
2959.51	79.2754		2959.51	79.7235		2959.51	78.2242
2961.37	79.3364		2961.37	79.7848		2961.37	78.2843
2963.23	79.5111		2963.23	79.9605		2963.23	78.4567
2965.1	79.6771		2965.1	80.1274		2965.1	78.6205
2966.96	79.8357		2966.96	80.2869		2966.96	78.777
2968.82	79.9976		2968.82	80.4497		2968.82	78.9367
2970.69	80.1767		2970.69	80.6299		2970.69	79.1135
2972.55	80.3174		2972.55	80.7714		2972.55	79.2523
2974.42	80.5978		2974.42	81.0533		2974.42	79.529
2976.28	80.8923		2976.28	81.3495		2976.28	79.8196
2978.14	80.8432		2978.14	81.3002		2978.14	79.7712
2980.01	80.8262		2980.01	81.283		2980.01	79.7544
2981.87	80.9699		2981.87	81.4276		2981.87	79.8962
2983.73	80.8863		2983.73	81.3434		2983.73	79.8136
2985.6	80.8687		2985.6	81.3258		2985.6	79.7963
2987.46	80.8689		2987.46	81.326		2987.46	79.7965
2989.32	80.7145		2989.32	81.1707		2989.32	79.6441
2991.19	80.7507		2991.19	81.2071		2991.19	79.6798
2993.05	80.9512		2993.05	81.4088		2993.05	79.8778
2994.92	81.0485		2994.92	81.5066		2994.92	79.9737
2996.78	80.9872		2996.78	81.445		2996.78	79.9133
2998.64	80.9765		2998.64	81.4342		2998.64	79.9026
3000.51	81.0262		3000.51	81.4842		3000.51	79.9518
3002.37	80.9878		3002.37	81.4456		3002.37	79.9139
3004.23	80.9769		3004.23	81.4346		3004.23	79.9031
3006.1	80.9403		3006.1	81.3978		3006.1	79.867
3007.96	80.829		3007.96	81.2859		3007.96	79.7572
3009.83	80.766		3009.83	81.2225		3009.83	79.6949
3011.69	80.7639		3011.69	81.2204		3011.69	79.6929
3013.55	80.7243		3013.55	81.1806		3013.55	79.6539
3015.42	80.7218		3015.42	81.178		3015.42	79.6513
3017.28	80.776		3017.28	81.2325		3017.28	79.7048
3019.14	80.6828		3019.14	81.1389		3019.14	79.6129
3021.01	80.5975		3021.01	81.053		3021.01	79.5287
3022.87	80.6024		3022.87	81.058		3022.87	79.5335
3024.73	80.5977		3024.73	81.0533		3024.73	79.5289
3026.6	80.4136		3026.6	80.8681		3026.6	79.3472
3028.46	80.2381		3028.46	80.6916		3028.46	79.1741
3030.33	80.2551		3030.33	80.7087		3030.33	79.1908
3032.19	80.3504		3032.19	80.8046		3032.19	79.2849
3034.05	80.3124		3034.05	80.7663		3034.05	79.2474
3035.92	80.2113		3035.92	80.6646		3035.92	79.1476
3037.78	80.1653		3037.78	80.6184		3037.78	79.1022
3039.64	80.1914		3039.64	80.6447		3039.64	79.128
3041.51	80.2304		3041.51	80.6839		3041.51	79.1665
3043.37	80.1169		3043.37	80.5697		3043.37	79.0544
3045.24	79.9964		3045.24	80.4486		3045.24	78.9356
3047.1	79.9122		3047.1	80.3638		3047.1	78.8525
3048.96	79.8473		3048.96	80.2986		3048.96	78.7885
3050.83	79.7454		3050.83	80.1961		3050.83	78.6879
3052.69	79.7539		3052.69	80.2047		3052.69	78.6963
3054.55	79.8322		3054.55	80.2834		3054.55	78.7735
3056.42	79.5966		3056.42	80.0465		3056.42	78.5411
3058.28	79.5146		3058.28	79.964		3058.28	78.4601
3060.14	79.503		3060.14	79.9524		3060.14	78.4488
3062.01	79.4975		3062.01	79.9468		3062.01	78.4433
3063.87	79.5123		3063.87	79.9618		3063.87	78.4579
3065.74	79.3747		3065.74	79.8233		3065.74	78.3221
3067.6	79.3604		3067.6	79.809		3067.6	78.308
3069.46	79.3567		3069.46	79.8052		3069.46	78.3043
3071.33	79.3927		3071.33	79.8414		3071.33	78.3399
3073.19	79.3778		3073.19	79.8265		3073.19	78.3252
3075.05	79.3322		3075.05	79.7806		3075.05	78.2801
3076.92	79.31		3076.92	79.7582		3076.92	78.2582
3078.78	79.2918		3078.78	79.74		3078.78	78.2403
3080.64	79.226		3080.64	79.6738		3080.64	78.1754
3082.51	79.2214		3082.51	79.6692		3082.51	78.1709
3084.37	79.2964		3084.37	79.7446		3084.37	78.2448
3086.24	79.2197		3086.24	79.6674		3086.24	78.1691
3088.1	79.1319		3088.1	79.5792		3088.1	78.0825
3089.96	79.1601		3089.96	79.6075		3089.96	78.1103
3091.83	79.1599		3091.83	79.6073		3091.83	78.1102
3093.69	79.1442		3093.69	79.5915		3093.69	78.0947
3095.55	79.0965		3095.55	79.5436		3095.55	78.0477
3097.42	79.0302		3097.42	79.4769		3097.42	77.9822
3099.28	79.0627		3099.28	79.5096		3099.28	78.0143
3101.15	79.1625		3101.15	79.6099		3101.15	78.1127
3103.01	79.2588		3103.01	79.7068		3103.01	78.2078
3104.87	79.3302		3104.87	79.7786		3104.87	78.2782
3106.74	79.2691		3106.74	79.7172		3106.74	78.2179
3108.6	79.0635		3108.6	79.5103		3108.6	78.015
3110.46	78.955		3110.46	79.4013		3110.46	77.908
3112.33	78.9941		3112.33	79.4405		3112.33	77.9465
3114.19	79.03		3114.19	79.4767		3114.19	77.982
3116.05	79.1159		3116.05	79.5631		3116.05	78.0667
3117.92	79.0541		3117.92	79.5009		3117.92	78.0058
3119.78	78.9012		3119.78	79.3472		3119.78	77.8549
3121.65	78.782		3121.65	79.2273		3121.65	77.7373
3123.51	78.7513		3123.51	79.1965		3123.51	77.707
3125.37	78.7781		3125.37	79.2233		3125.37	77.7334
3127.24	78.8208		3127.24	79.2663		3127.24	77.7756
3129.1	78.9007		3129.1	79.3466		3129.1	77.8544
3130.96	78.7953		3130.96	79.2407		3130.96	77.7504
3132.83	78.5219		3132.83	78.9657		3132.83	77.4806
3134.69	78.5193		3134.69	78.9631		3134.69	77.4781
3136.55	78.6424		3136.55	79.0869		3136.55	77.5995
3138.42	78.6008		3138.42	79.045		3138.42	77.5585
3140.28	78.4291		3140.28	78.8724		3140.28	77.3891
3142.15	78.3638		3142.15	78.8067		3142.15	77.3246
3144.01	78.3579		3144.01	78.8008		3144.01	77.3188
3145.87	78.2402		3145.87	78.6824		3145.87	77.2027
3147.74	78.1165		3147.74	78.5581		3147.74	77.0806
3149.6	78.1662		3149.6	78.608		3149.6	77.1296
3151.46	78.221		3151.46	78.6631		3151.46	77.1837
3153.33	78.2628		3153.33	78.7051		3153.33	77.2249
3155.19	78.1949		3155.19	78.6369		3155.19	77.158
3157.06	78.1054		3157.06	78.5469		3157.06	77.0697
3158.92	78.064		3158.92	78.5053		3158.92	77.0288
3160.78	77.9387		3160.78	78.3793		3160.78	76.9052
3162.65	77.8145		3162.65	78.2544		3162.65	76.7827
3164.51	77.6731		3164.51	78.1121		3164.51	76.6431
3166.37	77.5294		3166.37	77.9676		3166.37	76.5013
3168.24	77.6817		3168.24	78.1208		3168.24	76.6516
3170.1	77.763		3170.1	78.2026		3170.1	76.7318
3171.96	77.5352		3171.96	77.9734		3171.96	76.507
3173.83	77.4605		3173.83	77.8984		3173.83	76.4334
3175.69	77.4903		3175.69	77.9283		3175.69	76.4627
3177.56	77.3611		3177.56	77.7983		3177.56	76.3352
3179.42	77.3444		3179.42	77.7816		3179.42	76.3188
3181.28	77.4324		3181.28	77.87		3181.28	76.4055
3183.15	77.4391		3183.15	77.8768		3183.15	76.4122
3185.01	77.4091		3185.01	77.8466		3185.01	76.3826
3186.87	77.3674		3186.87	77.8047		3186.87	76.3414
3188.74	77.2842		3188.74	77.7211		3188.74	76.2594
3190.6	77.2139		3190.6	77.6503		3190.6	76.19
3192.46	77.1456		3192.46	77.5816		3192.46	76.1225
3194.33	77.0644		3194.33	77.4999		3194.33	76.0424
3196.19	77.1219		3196.19	77.5578		3196.19	76.0991
3198.06	77.1838		3198.06	77.6201		3198.06	76.1603
3199.92	77.196		3199.92	77.6324		3199.92	76.1724
3201.78	77.2159		3201.78	77.6523		3201.78	76.1919
3203.65	77.1998		3203.65	77.6362		3203.65	76.1761
3205.51	76.9966		3205.51	77.4318		3205.51	75.9756
3207.37	76.8515		3207.37	77.2859		3207.37	75.8324
3209.24	76.9352		3209.24	77.37		3209.24	75.9149
3211.1	76.9755		3211.1	77.4106		3211.1	75.9548
3212.97	76.8511		3212.97	77.2855		3212.97	75.832
3214.83	76.7154		3214.83	77.149		3214.83	75.698
3216.69	76.6369		3216.69	77.0701		3216.69	75.6207
3218.56	76.6405		3218.56	77.0737		3218.56	75.6242
3220.42	76.6227		3220.42	77.0558		3220.42	75.6066
3222.28	76.5736		3222.28	77.0064		3222.28	75.5582
3224.15	76.5424		3224.15	76.975		3224.15	75.5274
3226.01	76.635		3226.01	77.0682		3226.01	75.6188
3227.87	76.6882		3227.87	77.1217		3227.87	75.6713
3229.74	76.5557		3229.74	76.9884		3229.74	75.5405
3231.6	76.5323		3231.6	76.9648		3231.6	75.5174
3233.47	76.5423		3233.47	76.975		3233.47	75.5273
3235.33	76.4921		3235.33	76.9244		3235.33	75.4777
3237.19	76.5488		3237.19	76.9814		3237.19	75.5337
3239.06	76.6198		3239.06	77.0529		3239.06	75.6037
3240.92	76.5661		3240.92	76.9988		3240.92	75.5507
3242.78	76.4343		3242.78	76.8664		3242.78	75.4208
3244.65	76.3477		3244.65	76.7792		3244.65	75.3352
3246.51	76.1782		3246.51	76.6088		3246.51	75.168
3248.37	76.0235		3248.37	76.4531		3248.37	75.0153
3250.24	76.1015		3250.24	76.5317		3250.24	75.0924
3252.1	76.1735		3252.1	76.6041		3252.1	75.1634
3253.97	76.0543		3253.97	76.4842		3253.97	75.0457
3255.83	75.9368		3255.83	76.366		3255.83	74.9298
3257.69	75.9943		3257.69	76.4239		3257.69	74.9866
3259.56	76.153		3259.56	76.5834		3259.56	75.1431
3261.42	76.0996		3261.42	76.5297		3261.42	75.0904
3263.28	75.9959		3263.28	76.4255		3263.28	74.9881
3265.15	75.9464		3265.15	76.3757		3265.15	74.9393
3267.01	75.9371		3267.01	76.3663		3267.01	74.9301
3268.88	76.0422		3268.88	76.472		3268.88	75.0338
3270.74	75.9574		3270.74	76.3868		3270.74	74.9502
3272.6	75.8215		3272.6	76.25		3272.6	74.816
3274.47	75.721		3274.47	76.149		3274.47	74.7169
3276.33	75.6643		3276.33	76.0919		3276.33	74.6609
3278.19	75.7416		3278.19	76.1697		3278.19	74.7372
3280.06	75.9182		3280.06	76.3474		3280.06	74.9115
3281.92	76.0152		3281.92	76.4448		3281.92	75.0071
3283.78	75.8894		3283.78	76.3183		3283.78	74.883
3285.65	75.7786		3285.65	76.2069		3285.65	74.7737
3287.51	75.9396		3287.51	76.3688		3287.51	74.9325
3289.38	76.1982		3289.38	76.6289		3289.38	75.1877
3291.24	76.1455		3291.24	76.5759		3291.24	75.1357
3293.1	76.0203		3293.1	76.45		3293.1	75.0123
3294.97	76.1363		3294.97	76.5666		3294.97	75.1266
3296.83	76.1594		3296.83	76.5899		3296.83	75.1495
3298.69	76.0574		3298.69	76.4873		3298.69	75.0488
3300.56	76.1938		3300.56	76.6245		3300.56	75.1834
3302.42	76.4866		3302.42	76.9189		3302.42	75.4723
3304.28	76.4513		3304.28	76.8834		3304.28	75.4375
3306.15	76.2717		3306.15	76.7028		3306.15	75.2603
3308.01	76.4378		3308.01	76.8698		3308.01	75.4242
3309.88	76.6754		3309.88	77.1088		3309.88	75.6587
3311.74	76.6988		3311.74	77.1323		3311.74	75.6817
3313.6	76.5252		3313.6	76.9577		3313.6	75.5104
3315.47	76.3141		3315.47	76.7454		3315.47	75.3021
3317.33	76.5796		3317.33	77.0124		3317.33	75.5641
3319.19	76.9162		3319.19	77.3509		3319.19	75.8962
3321.06	76.8833		3321.06	77.3179		3321.06	75.8638
3322.92	76.9393		3322.92	77.3742		3322.92	75.9191
3324.79	76.9769		3324.79	77.412		3324.79	75.9561
3326.65	76.9664		3326.65	77.4014		3326.65	75.9457
3328.51	77.0961		3328.51	77.5319		3328.51	76.0737
3330.38	77.15		3330.38	77.586		3330.38	76.1269
3332.24	77.067		3332.24	77.5026		3332.24	76.045
3334.1	76.9841		3334.1	77.4192		3334.1	75.9632
3335.97	77.1275		3335.97	77.5634		3335.97	76.1047
3337.83	77.2824		3337.83	77.7192		3337.83	76.2576
3339.69	77.1398		3339.69	77.5758		3339.69	76.1169
3341.56	77.0127		3341.56	77.448		3341.56	75.9914
3343.42	77.0959		3343.42	77.5317		3343.42	76.0735
3345.29	77.2307		3345.29	77.6672		3345.29	76.2065
3347.15	77.2916		3347.15	77.7285		3347.15	76.2666
3349.01	77.2648		3349.01	77.7015		3349.01	76.2402
3350.88	77.1974		3350.88	77.6338		3350.88	76.1737
3352.74	77.2099		3352.74	77.6463		3352.74	76.186
3354.6	77.4379		3354.6	77.8756		3354.6	76.411
3356.47	77.5933		3356.47	78.0319		3356.47	76.5643
3358.33	77.6186		3358.33	78.0573		3358.33	76.5893
3360.2	77.7292		3360.2	78.1686		3360.2	76.6985
3362.06	77.7021		3362.06	78.1413		3362.06	76.6717
3363.92	77.7589		3363.92	78.1984		3363.92	76.7278
3365.79	77.8454		3365.79	78.2854		3365.79	76.8131
3367.65	77.6303		3367.65	78.0691		3367.65	76.6009
3369.51	77.5372		3369.51	77.9754		3369.51	76.509
3371.38	77.7201		3371.38	78.1594		3371.38	76.6895
3373.24	77.8328		3373.24	78.2728		3373.24	76.8007
3375.1	77.7642		3375.1	78.2037		3375.1	76.7329
3376.97	77.732		3376.97	78.1713		3376.97	76.7012
3378.83	77.7572		3378.83	78.1967		3378.83	76.7261
3380.7	77.7645		3380.7	78.204		3380.7	76.7333
3382.56	77.9322		3382.56	78.3727		3382.56	76.8988
3384.42	78.1634		3384.42	78.6052		3384.42	77.1269
3386.29	78.0825		3386.29	78.5239		3386.29	77.0471
3388.15	77.9094		3388.15	78.3498		3388.15	76.8763
3390.01	78.0323		3390.01	78.4733		3390.01	76.9975
3391.88	78.1142		3391.88	78.5557		3391.88	77.0784
3393.74	78.1408		3393.74	78.5825		3393.74	77.1046
3395.6	78.3138		3395.6	78.7565		3395.6	77.2753
3397.47	78.3423		3397.47	78.7851		3397.47	77.3034
3399.33	78.4056		3399.33	78.8488		3399.33	77.3659
3401.2	78.5297		3401.2	78.9736		3401.2	77.4883
3403.06	78.4701		3403.06	78.9137		3403.06	77.4296
3404.92	78.416		3404.92	78.8592		3404.92	77.3761
3406.79	78.348		3406.79	78.7908		3406.79	77.309
3408.65	78.4115		3408.65	78.8547		3408.65	77.3717
3410.51	78.6859		3410.51	79.1306		3410.51	77.6424
3412.38	78.8316		3412.38	79.2772		3412.38	77.7862
3414.24	78.8934		3414.24	79.3393		3414.24	77.8472
3416.11	78.966		3416.11	79.4124		3416.11	77.9189
3417.97	78.9812		3417.97	79.4276		3417.97	77.9338
3419.83	79.0942		3419.83	79.5412		3419.83	78.0453
3421.7	79.1875		3421.7	79.6351		3421.7	78.1374
3423.56	79.2027		3423.56	79.6503		3423.56	78.1524
3425.42	79.1446		3425.42	79.592		3425.42	78.0951
3427.29	79.0856		3427.29	79.5326		3427.29	78.0369
3429.15	79.1239		3429.15	79.5712		3429.15	78.0747
3431.01	79.2185		3431.01	79.6663		3431.01	78.168
3432.88	79.2766		3432.88	79.7246		3432.88	78.2253
3434.74	79.3067		3434.74	79.7549		3434.74	78.255
3436.61	79.3735		3436.61	79.8221		3436.61	78.3209
3438.47	79.5292		3438.47	79.9787		3438.47	78.4746
3440.33	79.7029		3440.33	80.1534		3440.33	78.6459
3442.2	79.7589		3442.2	80.2097		3442.2	78.7012
3444.06	79.7916		3444.06	80.2426		3444.06	78.7335
3445.92	79.793		3445.92	80.244		3445.92	78.7348
3447.79	79.6543		3447.79	80.1045		3447.79	78.598
3449.65	79.7796		3449.65	80.2306		3449.65	78.7217
3451.51	80.1478		3451.51	80.6008		3451.51	79.085
3453.38	80.2977		3453.38	80.7515		3453.38	79.2329
3455.24	80.3081		3455.24	80.762		3455.24	79.2432
3457.11	80.1964		3457.11	80.6496		3457.11	79.1329
3458.97	80.0942		3458.97	80.5469		3458.97	79.0321
3460.83	80.1032		3460.83	80.5559		3460.83	79.0409
3462.7	80.0918		3462.7	80.5445		3462.7	79.0297
3464.56	80.2746		3464.56	80.7284		3464.56	79.2101
3466.42	80.3855		3466.42	80.8399		3466.42	79.3195
3468.29	80.249		3468.29	80.7026		3468.29	79.1848
3470.15	80.3224		3470.15	80.7763		3470.15	79.2572
3472.02	80.7152		3472.02	81.1715		3472.02	79.6449
3473.88	80.8358		3473.88	81.2927		3473.88	79.7638
3475.74	80.6428		3475.74	81.0986		3475.74	79.5734
3477.61	80.5453		3477.61	81.0005		3477.61	79.4772
3479.47	80.739		3479.47	81.1954		3479.47	79.6684
3481.33	80.9884		3481.33	81.4461		3481.33	79.9144
3483.2	81.2837		3483.2	81.7432		3483.2	80.2058
3485.06	81.5263		3485.06	81.9871		3485.06	80.4452
3486.92	81.4666		3486.92	81.927		3486.92	80.3862
3488.79	81.1757		3488.79	81.6345		3488.79	80.0992
3490.65	81.088		3490.65	81.5463		3490.65	80.0127
3492.52	81.4149		3492.52	81.8751		3492.52	80.3353
3494.38	81.7224		3494.38	82.1843		3494.38	80.6387
3496.24	81.7334		3496.24	82.1954		3496.24	80.6496
3498.11	81.6356		3498.11	82.097		3498.11	80.553
3499.97	81.7305		3499.97	82.1925		3499.97	80.6467
3501.83	81.8742		3501.83	82.337		3501.83	80.7885
3503.7	81.8418		3503.7	82.3043		3503.7	80.7565
3505.56	81.8604		3505.56	82.3231		3505.56	80.7749
3507.42	82.0282		3507.42	82.4919		3507.42	80.9405
3509.29	82.0742		3509.29	82.5381		3509.29	80.9858
3511.15	82.2662		3511.15	82.7312		3511.15	81.1753
3513.02	82.5448		3513.02	83.0114		3513.02	81.4502
3514.88	82.6741		3514.88	83.1413		3514.88	81.5777
3516.74	82.7397		3516.74	83.2074		3516.74	81.6425
3518.61	82.725		3518.61	83.1926		3518.61	81.628
3520.47	82.6556		3520.47	83.1228		3520.47	81.5595
3522.33	82.725		3522.33	83.1926		3522.33	81.628
3524.2	82.7611		3524.2	83.2289		3524.2	81.6636
3526.06	82.7346		3526.06	83.2022		3526.06	81.6374
3527.93	82.6329		3527.93	83.1		3527.93	81.5371
3529.79	82.7061		3529.79	83.1736		3529.79	81.6094
3531.65	83.1344		3531.65	83.6043		3531.65	82.0319
3533.52	83.508		3533.52	83.98		3533.52	82.4006
3535.38	83.7011		3535.38	84.1742		3535.38	82.5912
3537.24	83.6141		3537.24	84.0867		3537.24	82.5053
3539.11	83.5956		3539.11	84.0681		3539.11	82.4871
3540.97	83.6501		3540.97	84.1229		3540.97	82.5409
3542.83	83.5293		3542.83	84.0014		3542.83	82.4216
3544.7	83.4016		3544.7	83.873		3544.7	82.2956
3546.56	83.5032		3546.56	83.9751		3546.56	82.3958
3548.43	83.7725		3548.43	84.246		3548.43	82.6616
3550.29	83.8783		3550.29	84.3524		3550.29	82.766
3552.15	83.9752		3552.15	84.4499		3552.15	82.8617
3554.02	84.1509		3554.02	84.6266		3554.02	83.035
3555.88	84.0576		3555.88	84.5327		3555.88	82.943
3557.74	83.9758		3557.74	84.4505		3557.74	82.8623
3559.61	84.2784		3559.61	84.7548		3559.61	83.1608
3561.47	84.5971		3561.47	85.0752		3561.47	83.4752
3563.33	84.8029		3563.33	85.2822		3563.33	83.6784
3565.2	84.7449		3565.2	85.2239		3565.2	83.6211
3567.06	84.7627		3567.06	85.2418		3567.06	83.6387
3568.93	85.0555		3568.93	85.5363		3568.93	83.9276
3570.79	84.9653		3570.79	85.4455		3570.79	83.8386
3572.65	84.973		3572.65	85.4533		3572.65	83.8462
3574.52	84.9976		3574.52	85.478		3574.52	83.8704
3576.38	85.2477		3576.38	85.7296		3576.38	84.1173
3578.24	85.7192		3578.24	86.2037		3578.24	84.5825
[truncated: 226 more rows]
